# Supplementary material for: Co-expression network analysis reveals the pivotal role of mitochondrial dysfunction and interferon signature in juvenile dermatomyositis
Source: PeerJ. 2020 Feb 18;8:e8611. doi: 10.7717/peerj.8611 (PMC7034382; doi:10.7717/peerj.8611)
Supplement: Table S1 [file peerj-08-8611-s001.xlsx]

## Sheet: Sheet1
The information of samples from GEO dataset
GEO ID	platform	Sample ID	State	Tissue
GSE3307	Affymetrix Human Genome U133A Array, Affymetrix Human Genome U133B Array	GSM121205	JDM	muscle
		GSM121206	JDM	muscle
		GSM121207	JDM	muscle
		GSM121208	JDM	muscle
		GSM121209	JDM	muscle
		GSM121210	JDM	muscle
		GSM121211	JDM	muscle
		GSM121212	JDM	muscle
		GSM121213	JDM	muscle
		GSM121214	JDM	muscle
		GSM121215	JDM	muscle
		GSM121216	JDM	muscle
		GSM121217	JDM	muscle
		GSM121218	JDM	muscle
		GSM121234	JDM	muscle
		GSM121243	JDM	muscle
		GSM121244	JDM	muscle
		GSM121245	JDM	muscle
		GSM121246	JDM	muscle
		GSM121247	JDM	muscle
		GSM121248	HC	muscle
		GSM121400	HC	muscle
		GSM121401	HC	muscle
		GSM121402	HC	muscle
		GSM121403	HC	muscle
		GSM121404	HC	muscle
		GSM121405	HC	muscle
		GSM121406	HC	muscle
		GSM121408	HC	muscle
		GSM121409	HC	muscle
		GSM121410	HC	muscle
		GSM121412	HC	muscle
		GSM121413	HC	muscle
		GSM121414	HC	muscle
		GSM121415	HC	muscle
		GSM121416	HC	muscle
		GSM120765	HC	muscle
		GSM120767	HC	muscle
		GSM120784	HC	muscle
GSE11971	Affymetrix Human Genome U133A Array	GSM303190	JDM	muscle
		GSM303191	JDM	muscle
		GSM303192	JDM	muscle
		GSM303193	JDM	muscle
		GSM303194	JDM	muscle
		GSM303195	JDM	muscle
		GSM303196	JDM	muscle
		GSM303197	JDM	muscle
		GSM303198	JDM	muscle
		GSM303199	JDM	muscle
		GSM303200	JDM	muscle
		GSM303201	JDM	muscle
		GSM303202	JDM	muscle
		GSM303203	JDM	muscle
		GSM303204	JDM	muscle
		GSM303205	Control	muscle
		GSM303206	Control	muscle
		GSM303207	Control	muscle
		GSM303208	Control	muscle
		GSM303209	JDM	muscle
		GSM303210	JDM	muscle
		GSM303211	JDM	muscle
		GSM303212	JDM	muscle
