# Supplementary material for: Co-expression network analysis reveals the pivotal role of mitochondrial dysfunction and interferon signature in juvenile dermatomyositis
Source: PeerJ. 2020 Feb 18;8:e8611. doi: 10.7717/peerj.8611 (PMC7034382; doi:10.7717/peerj.8611)
Supplement: Table S3 [file peerj-08-8611-s003.xlsx]

## Sheet: blue
source	term_name	term_id	adjusted_p_value	negative_log10_of_adjusted_p_value	term_size	query_size	intersection_size	effective_domain_size	intersections
GO:MF	structural constituent of ribosome	GO:0003735	2.68873e-60	59.5705	171	1151	91	18098	MRPS7,RPL21,RPS11,RPS4Y1,RPS14,RPL27,UBA52,RPS15A,RPS16,RPL13A,RPL3L,RPS15,RPS3A,RPS5,RPS29,RPLP0,RPL6,RPS24,RPLP1,RPL8,RPL9,RPS27,FAU,RPS20,RPL27A,RPL30,MRPL33,RPL7,RPL4,RPS9,RPL22,RPL37,RPL38,RPL10,RPL32,RPL35,MRPL11,MRPL16,MRPL2,MRPL23,MRPL34,MRPL35,RPL29,MRPL41,MRPL46,MRPL52,MRPL55,MRPS18B,MRPS33,RPL10A,NDUFA7,RPS25,RPL13,RPS28,RPL15,RPL11,RPL12,RPS6,RPL14,RPL18A,RPL39,RPL23,RPL23A,RPS23,RPL3…
GO:MF	structural molecule activity	GO:0005198	1.50895e-36	35.8213	680	1151	144	18098	ACTA1,ACTN2,ACTN3,ADD3,AEBP1,MRPS7,RPL21,ASPN,RPS11,RPS4Y1,RPS14,RPL27,UBA52,RPS15A,RPS16,RPL13A,RPL3L,COL21A1,COL27A1,COL9A2,COPB1,RPS15,RPS3A,CRYAB,CRYBG3,CSRP3,RPS5,CAPN3,RPS29,RPLP0,DCTN3,DES,RPL6,RPS24,RPLP1,RPL8,RPL9,EMILIN3,TPM2,RPS27,FAU,FBLN5,RPS20,FMOD,RPL27A,RPL30,MRPL33,RPL7,RPL4,HSPB6,IGFBP7,SNTA1,ISCA1,JPH1,RPS9,KRT10,KRT82,LAMB1,LAMC1,RPL22,RPL37,RPL38,RPL10,RPL32,RPL35,MRPL11,OPTC…
GO:MF	oxidoreductase activity	GO:0016491	1.10357e-27	26.9572	765	1151	139	18098	NDUFB10,ACAD11,ACADM,ACADVL,COX5B,NDUFA4,AIFM1,COX6A2,NDUFB4,ALDH5A1,MDH2,COX7C,NDUFC2,DHRS7C,NDUFA8,NDUFV2,UQCRC1,COX4I1,BLVRB,CARNS1,ALKBH5,COX3,COX6C,COX7A2,COX7A2L,MGST3,CYC1,CYB561A3,CYB5R1,CYCS,DCXR,DECR1,DECR2,COX6B1,DHRS4,DLAT,UQCRH,NDUFB7,UQCRFS1,NDUFB2,IDH2,ETFB,ETFDH,NDUFB9,UQCR11,PRDX2,NDUFB3,UQCR10,FOXRED1,UQCRQ,FTH1,GAPDH,GFOD1,GLRX5,GMPR,GPD1,GPD1L,GPX4,NDUFS3,NDUFA1,GSTK1,GSTO1,GS…
GO:MF	NADH dehydrogenase (quinone) activity	GO:0050136	1.85062e-26	25.7327	47	1151	33	18098	NDUFB10,NDUFA4,NDUFB4,NDUFC2,NDUFA8,NDUFV2,NDUFB7,NDUFB2,NDUFB9,NDUFB3,NDUFS3,NDUFA1,NDUFAB1,NDUFS7,ND4,NDUFA10,NDUFA3,NDUFA5,NDUFA6,NDUFA7,NDUFB1,NDUFA2,NDUFC1,NDUFS1,NDUFS2,NDUFS4,NDUFS5,NDUFV1,NDUFA9,NDUFS6,NDUFB6,NDUFA13,WDR93
GO:MF	NADH dehydrogenase (ubiquinone) activity	GO:0008137	1.85062e-26	25.7327	47	1151	33	18098	NDUFB10,NDUFA4,NDUFB4,NDUFC2,NDUFA8,NDUFV2,NDUFB7,NDUFB2,NDUFB9,NDUFB3,NDUFS3,NDUFA1,NDUFAB1,NDUFS7,ND4,NDUFA10,NDUFA3,NDUFA5,NDUFA6,NDUFA7,NDUFB1,NDUFA2,NDUFC1,NDUFS1,NDUFS2,NDUFS4,NDUFS5,NDUFV1,NDUFA9,NDUFS6,NDUFB6,NDUFA13,WDR93
GO:MF	NADH dehydrogenase activity	GO:0003954	5.56628e-26	25.2544	48	1151	33	18098	NDUFB10,NDUFA4,NDUFB4,NDUFC2,NDUFA8,NDUFV2,NDUFB7,NDUFB2,NDUFB9,NDUFB3,NDUFS3,NDUFA1,NDUFAB1,NDUFS7,ND4,NDUFA10,NDUFA3,NDUFA5,NDUFA6,NDUFA7,NDUFB1,NDUFA2,NDUFC1,NDUFS1,NDUFS2,NDUFS4,NDUFS5,NDUFV1,NDUFA9,NDUFS6,NDUFB6,NDUFA13,WDR93
GO:MF	oxidoreductase activity, acting on NAD(P)H, quinone or similar compound as acceptor	GO:0016655	5.69955e-25	24.2442	61	1151	36	18098	NDUFB10,NDUFA4,NDUFB4,NDUFC2,NDUFA8,NDUFV2,DCXR,DHRS4,NDUFB7,NDUFB2,NDUFB9,NDUFB3,NDUFS3,NDUFA1,NDUFAB1,NDUFS7,ND4,NDUFA10,NDUFA3,NDUFA5,NDUFA6,NDUFA7,NDUFB1,NDUFA2,NDUFC1,NDUFS1,NDUFS2,NDUFS4,NDUFS5,NDUFV1,NQO2,NDUFA9,NDUFS6,NDUFB6,NDUFA13,WDR93
GO:MF	oxidoreductase activity, acting on NAD(P)H	GO:0016651	3.11885e-21	20.506	107	1151	43	18098	NDUFB10,NDUFA4,AIFM1,NDUFB4,NDUFC2,NDUFA8,NDUFV2,CYB5R1,DCXR,DHRS4,NDUFB7,NDUFB2,NDUFB9,NDUFB3,GMPR,NDUFS3,NDUFA1,NDUFAB1,NDUFS7,ND4,NDUFA10,NDUFA3,NDUFA5,NDUFA6,NDUFA7,NDUFB1,NDUFA2,NDUFC1,NDUFS1,NDUFS2,NDUFS4,NDUFS5,NDUFV1,NNT,NOS1,NQO2,PGK1,NDUFA9,NDUFS6,NDUFB6,NDUFA13,ECSIT,WDR93
GO:MF	electron transfer activity	GO:0009055	3.41946e-18	17.466	113	1151	41	18098	COX5B,NDUFA4,COX6A2,COX7C,NDUFV2,UQCRC1,COX4I1,COX3,COX6C,COX7A2,COX7A2L,CYC1,CYCS,COX6B1,UQCRH,UQCRFS1,ETFB,ETFDH,UQCR11,UQCR10,UQCRQ,GLRX5,NDUFS3,AKR7A2,MAOB,COX7B,UQCRB,NDUFS1,NDUFS2,NQO2,COX7A1,COX8A,PTGES2,QDPR,COX5A,NDUFS6,SDHB,SDHA,SDHC,SDHD,AKR1B1
GO:MF	structural constituent of muscle	GO:0008307	1.04128e-11	10.9824	43	1151	21	18098	ACTN2,ACTN3,CSRP3,CAPN3,TPM2,JPH1,MYBPC2,MYL1,MYL2,MYL3,MYLPF,MYOT,PDLIM3,PLEC,MYOM1,TPM1,SMTN,TCAP,NEB,TTN,MYBPC1
GO:MF	rRNA binding	GO:0019843	3.65098e-11	10.4376	60	1151	24	18098	MRPS7,RPS11,RPS4Y1,RPS14,EEF2,RPS5,RPLP0,RPL8,RPL9,GTF3A,NGRN,RPS9,RPL37,MRPL11,MRPL16,RPL11,RPL12,RPL23,RPL23A,RPL3,RPL5,RPS18,RPS3,RPS4X
GO:MF	actin binding	GO:0003779	2.1897e-10	9.65962	432	1151	70	18098	ACTN2,ACTN3,ADD3,SYNPO,PARVB,CAMK2B,MYOZ1,EEF2,ADSSL1,CSRP3,CTNNA3,CYFIP1,DAAM2,TMOD4,BIN1,EPS8,TPM2,FHDC1,FHOD1,FHOD3,FLII,FHL3,SNTA1,KLHL17,SVIL,LMOD1,LMOD2,CAP2,MEFV,MIB2,MPRIP,MSRB2,MYBPC2,MYH1,MYH14,MYH4,MYH6,MYH7,MYH7B,MYL2,MYL3,MYOZ3,MYPN,MYOT,PRICKLE4,PDLIM1,PDLIM3,PDLIM7,PLEC,PLS3,PSTPIP2,RCSD1,MYOM1,TPM1,SMTN,SORBS1,OPHN1,MYH2,SYNPO2L,TNNC1,TNNC2,TNNI1,TNNI2,TNNT3,NEB,TPM3,TTN,TWF2,MYBP…
GO:MF	RNA binding	GO:0003723	1.41565e-09	8.84904	1902	1151	196	18098	EIF3K,EIF1,AHCYL1,MDH2,EIF4A2,ANXA2,MRPS7,RPL21,RPS11,RPS4Y1,RPS14,RPL27,AUH,YBX3,BTF3,EEF1D,YBX1,ALKBH5,RPS15A,RPS16,CLUH,RPL13A,RPL3L,EEF2,RPS15,RPS3A,CS,CSDE1,RPS5,CYFIP1,RPS29,RPLP0,DDX3X,RPL6,RPS24,EIF3F,EEF1G,DNTTIP2,RPL8,RPL9,EEF1A1,EEF1A2,EEF2K,EIF1AX,EIF1B,EIF2D,EIF3E,EIF3H,EIF4G1,EIF5A,EIF3L,EPRS,HDLBP,RPS27,FAU,FBL,FBLL1,RPS20,FXR2,RPL27A,GANAB,RPL30,GRSF1,RPL7,GTF3A,GTPBP4,RPL4,HDGF,N…
GO:MF	translation regulator activity	GO:0045182	4.19203e-08	7.37758	151	1151	34	18098	EIF3K,EIF1,EIF4A2,RPS14,EEF1D,EEF2,CYFIP1,EIF3F,EEF1G,EEF1A1,EEF1A2,EEF2K,EIF1AX,EIF1B,EIF2D,EIF3E,EIF3H,EIF4G1,EIF5A,EIF3L,FXR2,RPS9,RPL22,RPL10,MTIF2,MTIF3,EIF3G,EEF1B2,EIF1AY,SAMD4A,CNBP,TUFM,EIF3I,ELOF1
GO:MF	oxidoreductase activity, acting on a heme group of donors, oxygen as acceptor	GO:0016676	9.17188e-08	7.03754	27	1151	14	18098	COX5B,NDUFA4,COX6A2,COX7C,COX4I1,COX3,COX6C,COX7A2,COX7A2L,COX6B1,COX7B,COX7A1,COX8A,COX5A
GO:MF	cytochrome-c oxidase activity	GO:0004129	9.17188e-08	7.03754	27	1151	14	18098	COX5B,NDUFA4,COX6A2,COX7C,COX4I1,COX3,COX6C,COX7A2,COX7A2L,COX6B1,COX7B,COX7A1,COX8A,COX5A
GO:MF	heme-copper terminal oxidase activity	GO:0015002	9.17188e-08	7.03754	27	1151	14	18098	COX5B,NDUFA4,COX6A2,COX7C,COX4I1,COX3,COX6C,COX7A2,COX7A2L,COX6B1,COX7B,COX7A1,COX8A,COX5A
GO:MF	translation factor activity, RNA binding	GO:0008135	1.6252e-07	6.78909	98	1151	26	18098	EIF3K,EIF1,EIF4A2,EEF1D,EEF2,EIF3F,EEF1G,EEF1A1,EEF1A2,EEF2K,EIF1AX,EIF1B,EIF2D,EIF3E,EIF3H,EIF4G1,EIF5A,EIF3L,MTIF2,MTIF3,EIF3G,EEF1B2,EIF1AY,TUFM,EIF3I,ELOF1
GO:MF	oxidoreductase activity, acting on a heme group of donors	GO:0016675	1.72707e-07	6.76269	28	1151	14	18098	COX5B,NDUFA4,COX6A2,COX7C,COX4I1,COX3,COX6C,COX7A2,COX7A2L,COX6B1,COX7B,COX7A1,COX8A,COX5A
GO:MF	cofactor binding	GO:0048037	2.64225e-07	6.57803	513	1151	71	18098	ACAD11,ACADM,ACADVL,AIFM1,ALAS1,NDUFV2,PGAM2,CISD1,COQ10A,CYC1,CYB5D2,CYB5R1,CYCS,DBI,DECR1,ECI2,UQCRFS1,IDH2,ETFDH,FLVCR2,GAPDH,GLRX5,GOT1,GPD1,GPD1L,GPT2,GSTP1,HADH,HBD,HBG1,HIBADH,ISCA1,ISCU,LMO2,MDH1,MAOB,ACADS,MB,NDUFAB1,NDUFS7,ND4,PYGM,NDUFS1,NDUFS2,NDUFV1,NFU1,NNT,NOS1,NQO2,NR1D1,OGDH,HSD17B8,PHYH,CYP2S1,PTGES2,GRHPR,QDPR,LDHA,HBB,ACAT1,RPS3,NDUFA9,SDHB,SDHA,SDHC,SDHD,SDR39U1,LDHD,ACO2,SUC…
GO:MF	cytoskeletal protein binding	GO:0008092	1.1061e-06	5.95621	984	1151	111	18098	ACTA1,ACTN2,ACTN3,ACTR1B,ADD3,SYNPO,AMPD1,ANKRD23,ANXA2,PARVB,CAMK2B,CAPN2,MYOZ1,CDH24,CLSTN1,EEF2,ADSSL1,CRYAB,CSRP3,CAPN3,CTNNA3,CYFIP1,DAAM2,TMOD4,DES,BIN1,EPS8,FABP3,TPM2,FHDC1,FHOD1,FHOD3,FLII,GABARAP,GAPDH,GNB1,GOLGA2,HOOK2,HSPA2,HSPB7,FHL3,FRMD3,SNTA1,IQGAP3,KLHL17,KTN1,SVIL,LMOD1,LMOD2,CAP2,LRPPRC,MEFV,MIB2,MPRIP,MSRB2,MYBPC2,MYH1,MYH14,MYH4,MYH6,MYH7,MYH7B,MYL2,MYL3,MYLK2,MYOC,MYOZ3,MYPN…
GO:MF	translation regulator activity, nucleic acid binding	GO:0090079	2.00898e-05	4.69703	121	1151	26	18098	EIF3K,EIF1,EIF4A2,EEF1D,EEF2,EIF3F,EEF1G,EEF1A1,EEF1A2,EEF2K,EIF1AX,EIF1B,EIF2D,EIF3E,EIF3H,EIF4G1,EIF5A,EIF3L,MTIF2,MTIF3,EIF3G,EEF1B2,EIF1AY,TUFM,EIF3I,ELOF1
GO:MF	oxidoreductase activity, acting on diphenols and related substances as donors, cytochrome as acceptor	GO:0016681	8.10436e-05	4.09128	9	1151	7	18098	UQCRC1,UQCRH,UQCRFS1,UQCR11,UQCR10,UQCRQ,UQCRB
GO:MF	ubiquinol-cytochrome-c reductase activity	GO:0008121	8.10436e-05	4.09128	9	1151	7	18098	UQCRC1,UQCRH,UQCRFS1,UQCR11,UQCR10,UQCRQ,UQCRB
GO:MF	translation initiation factor activity	GO:0003743	0.00014567	3.83663	56	1151	16	18098	EIF3K,EIF1,EIF4A2,EIF3F,EIF1AX,EIF1B,EIF2D,EIF3E,EIF3H,EIF4G1,EIF3L,MTIF2,MTIF3,EIF3G,EIF1AY,EIF3I
GO:MF	catalytic activity	GO:0003824	0.000161626	3.79149	5840	1151	450	18098	NDUFB10,AATK,ABCA1,ABCA8,ABCD3,ACAD11,ACADM,TPI1,ACADVL,COX5B,NDUFA4,ACOT1,ACOT13,ACSL1,ACY3,ACYP2,ADAMTS1,ADSL,AEBP1,AGMAT,AHCYL1,AIFM1,AK1,AK8,COX6A2,NDUFB4,ALAS1,ALDH5A1,MDH2,ALG11,COX7C,AMPD1,AMT,EIF4A2,NDUFC2,ARAF,ARF5,ARL2,DHRS7C,ASH2L,ASNSD1,NDUFA8,ATP13A4,ATP1A2,NDUFV2,UQCRC1,PGAM2,COX4I1,ATP6,ATP6V1G1,AUH,PPP1R3C,AZGP1,B3GNT9,HAGHL,BCKDK,BIRC2,BLVRB,MAPK12,CA14,CA2,CA3,CAMK2B,CAPN2,CARM1…
GO:MF	oxidoreductase activity, acting on diphenols and related substances as donors	GO:0016679	0.000255224	3.59308	10	1151	7	18098	UQCRC1,UQCRH,UQCRFS1,UQCR11,UQCR10,UQCRQ,UQCRB
GO:MF	NAD binding	GO:0051287	0.000668659	3.1748	55	1151	15	18098	IDH2,GAPDH,GPD1,GPD1L,HADH,HIBADH,MDH1,NDUFS2,NDUFV1,NNT,HSD17B8,GRHPR,QDPR,LDHA,SIRT2
GO:MF	actin filament binding	GO:0051015	0.0011421	2.9423	194	1151	31	18098	ACTN2,ACTN3,ADD3,EEF2,ADSSL1,CTNNA3,CYFIP1,TMOD4,BIN1,TPM2,FLII,KLHL17,SVIL,MYH1,MYH14,MYH4,MYH6,MYH7,MYH7B,PLS3,RCSD1,MYOM1,TPM1,MYH2,TNNC1,TNNC2,NEB,TPM3,TTN,TWF2,XIRP2
GO:MF	proton transmembrane transporter activity	GO:0015078	0.00190146	2.72091	133	1151	24	18098	COX5B,NDUFA4,COX6A2,COX7C,ATP2A1,COX4I1,ATP6,ATP6AP1L,ATP6V1G1,SLC25A3,COX3,COX6C,COX7A2,COX7A2L,COX6B1,COX7B,NNT,COX7A1,ATP5J,COX8A,ATP5G1,COX5A,ATP2A2,SLC45A3
GO:MF	coenzyme binding	GO:0050662	0.00547683	2.26147	292	1151	39	18098	ACAD11,ACADM,ACADVL,AIFM1,ALAS1,CYB5R1,DBI,DECR1,ECI2,IDH2,ETFDH,GAPDH,GOT1,GPD1,GPD1L,GPT2,HADH,HIBADH,MDH1,MAOB,ACADS,PYGM,NDUFS2,NDUFV1,NNT,NOS1,NQO2,OGDH,HSD17B8,PHYH,GRHPR,QDPR,LDHA,ACAT1,NDUFA9,SDHA,SDR39U1,LDHD,SIRT2
GO:MF	protein binding	GO:0005515	0.00620553	2.20722	12715	1151	872	18098	NDUFB10,AATK,ABCA1,ABCD3,EIF3K,ABI3,ACAD11,ACADM,TPI1,COX5B,NDUFA4,ACTA1,ACTN2,ACTN3,ACTR1B,ACY3,ACYP2,LRRC20,EIF1,ADD3,ADIPOR1,ADRM1,LMO1,AEBP1,NECAB3,SYNPO,AHCYL1,AIFM1,AK8,ALAS1,ALDH5A1,MDH2,AMIGO1,AMPD1,AMT,ANAPC13,ANGPTL2,TEX37,EIF4A2,ANKRD23,ANKRD33B,ANKRD46,ANXA2,AP2S1,AP3S1,APCDD1,APOC2,APP,ARAF,ARF5,ARHGAP29,ARHGEF6,ARID5B,ARL2,RPL21,ARPP19,COA3,ASB14,ASH2L,ASPN,ATG14,ATG2A,ATP1A2,ATP2A1…
GO:MF	metal cluster binding	GO:0051540	0.00639207	2.19436	65	1151	15	18098	NDUFV2,CISD1,UQCRFS1,ETFDH,GLRX5,ISCA1,ISCU,NDUFS7,NDUFS1,NDUFS2,NDUFV1,NFU1,RPS3,SDHB,ACO2
GO:MF	iron-sulfur cluster binding	GO:0051536	0.00639207	2.19436	65	1151	15	18098	NDUFV2,CISD1,UQCRFS1,ETFDH,GLRX5,ISCA1,ISCU,NDUFS7,NDUFS1,NDUFS2,NDUFV1,NFU1,RPS3,SDHB,ACO2
GO:MF	quinone binding	GO:0048038	0.0063988	2.1939	19	1151	8	18098	COQ10A,ETFDH,NDUFS7,ND4,NDUFS2,HSD17B8,SDHB,SDHD
GO:MF	cadherin binding	GO:0045296	0.00837941	2.07679	330	1151	42	18098	ANXA2,EEF1D,CDH24,BZW2,EEF2,CTNNA3,DDX3X,RPL6,EEF1G,EIF3E,HDLBP,GOLGA2,HSPA1A,HSPA8,IQGAP1,IST1,ITGA6,KTN1,MPRIP,RPL29,RTN4,OLA1,PACSIN2,PCBP1,PDLIM1,RPL15,PKM,PLEC,PRDX1,PRDX6,PSMB6,PTPRO,LDHA,RPL14,RPL23A,RPL34,RPL7A,RPL24,RPS2,STK24,TWF2,VAPA
GO:MF	large ribosomal subunit rRNA binding	GO:0070180	0.00992688	2.00319	4	1151	4	18098	RPLP0,MRPL11,RPL12,RPL23
GO:MF	translation elongation factor activity	GO:0003746	0.0165712	1.78065	27	1151	9	18098	EEF1D,EEF2,EEF1G,EEF1A1,EEF1A2,EIF5A,EEF1B2,TUFM,ELOF1
GO:MF	oxidoreductase activity, acting on the CH-OH group of donors, NAD or NADP as acceptor	GO:0016616	0.0184403	1.73423	123	1151	21	18098	MDH2,DHRS7C,CARNS1,DCXR,DHRS4,IDH2,GPD1,GPD1L,HADH,HIBADH,HSD17B10,HSD17B12,IMPDH2,LDHB,AKR7A2,MDH1,HSD17B8,GRHPR,LDHA,LDHD,AKR1B1
GO:MF	protein tag	GO:0031386	0.0299565	1.52351	8	1151	5	18098	UBA52,RPS27A,UBB,UBC,UBL5
GO:MF	ubiquinone binding	GO:0048039	0.0299565	1.52351	8	1151	5	18098	COQ10A,ETFDH,ND4,SDHB,SDHD
GO:MF	2 iron, 2 sulfur cluster binding	GO:0051537	0.0330137	1.48131	23	1151	8	18098	NDUFV2,CISD1,UQCRFS1,GLRX5,ISCA1,ISCU,NDUFS1,SDHB
GO:MF	muscle alpha-actinin binding	GO:0051371	0.0430464	1.36606	18	1151	7	18098	MYPN,PRICKLE4,PDLIM1,PDLIM3,PDLIM7,MYOM1,TTN
GO:MF	FATZ binding	GO:0051373	0.0471173	1.32682	5	1151	4	18098	ACTN2,MYOZ1,MYOZ3,TCAP
GO:MF	porin activity	GO:0015288	0.0471173	1.32682	5	1151	4	18098	VDAC1,VDAC3,VDAC2,TOMM40
GO:BP	SRP-dependent cotranslational protein targeting to membrane	GO:0006614	2.94894e-66	65.5303	96	1126	74	17847	RPL21,RPS11,RPS4Y1,RPS14,RPL27,UBA52,RPS15A,RPS16,RPL13A,RPS15,RPS3A,RPS5,RPS29,RPLP0,RPL6,RPS24,RPLP1,RPL8,RPL9,RPS27,FAU,RPS20,RPL27A,RPL30,RPL7,RPL4,RPS9,RPL22,RPL37,RPL38,RPL10,RPL32,RPL35,RPL29,RPL10A,RPS25,RPL13,RPS28,RPL15,RPL11,RPL12,RPS6,RPL14,RPL18A,RPL39,RPL23,RPL23A,RPS23,RPL3,RPL34,RPL35A,RPL36,RPL36A,RPL31,RPL37A,RPL41,RPL5,RPL7A,RPL24,RPLP2,RPS17,RPS18,RPS19,RPS2,RPS21,RPS27A,RPS3,…
GO:BP	cotranslational protein targeting to membrane	GO:0006613	4.85079e-65	64.3142	101	1126	75	17847	RPL21,RPS11,RPS4Y1,RPS14,RPL27,UBA52,RPS15A,RPS16,RPL13A,RPS15,RPS3A,RPS5,RPS29,RPLP0,RPL6,RPS24,RPLP1,RPL8,RPL9,RPS27,FAU,RPS20,RPL27A,RPL30,RPL7,RPL4,RPS9,RPL22,RPL37,RPL38,RPL10,RPL32,RPL35,RPL29,RPL10A,RPS25,RPL13,RPS28,RPL15,RPL11,RPL12,RPS6,RPL14,RPL18A,RPL39,RPL23,RPL23A,RPS23,RPL3,RPL34,RPL35A,RPL36,RPL36A,RPL31,RPL37A,RPL41,RPL5,RPL7A,RPL24,RPLP2,RPS17,RPS18,RPS19,RPS2,RPS21,RPS27A,RPS3,…
GO:BP	protein targeting to ER	GO:0045047	2.1339e-59	58.6708	109	1126	74	17847	RPL21,RPS11,RPS4Y1,RPS14,RPL27,UBA52,RPS15A,RPS16,RPL13A,RPS15,RPS3A,RPS5,RPS29,RPLP0,RPL6,RPS24,RPLP1,RPL8,RPL9,RPS27,FAU,RPS20,RPL27A,RPL30,RPL7,RPL4,RPS9,RPL22,RPL37,RPL38,RPL10,RPL32,RPL35,RPL29,RPL10A,RPS25,RPL13,RPS28,RPL15,RPL11,RPL12,RPS6,RPL14,RPL18A,RPL39,RPL23,RPL23A,RPS23,RPL3,RPL34,RPL35A,RPL36,RPL36A,RPL31,RPL37A,RPL41,RPL5,RPL7A,RPL24,RPLP2,RPS17,RPS18,RPS19,RPS2,RPS21,RPS27A,RPS3,…
GO:BP	nuclear-transcribed mRNA catabolic process, nonsense-mediated decay	GO:0000184	3.27063e-58	57.4854	122	1126	77	17847	RPL21,RPS11,RPS4Y1,RPS14,RPL27,UBA52,RPS15A,RPS16,RPL13A,RPS15,RPS3A,RPS5,RPS29,RPLP0,RPL6,RPS24,RPLP1,RPL8,RPL9,EIF3E,EIF4G1,RPS27,FAU,RPS20,RPL27A,RPL30,RPL7,RPL4,RPS9,RPL22,RPL37,RPL38,RPL10,RPL32,RPL35,RPL29,RPL10A,RPS25,RPL13,RPS28,RPL15,PPP2R1A,RPL11,RPL12,RPS6,RPL14,RPL18A,RPL39,RPL23,RPL23A,RPS23,RPL3,RPL34,RPL35A,RPL36,RPL36A,RPL31,RPL37A,RPL41,RPL5,RPL7A,RPL24,RPLP2,RPS17,RPS18,RPS19,RP…
GO:BP	establishment of protein localization to endoplasmic reticulum	GO:0072599	1.31257e-57	56.8819	113	1126	74	17847	RPL21,RPS11,RPS4Y1,RPS14,RPL27,UBA52,RPS15A,RPS16,RPL13A,RPS15,RPS3A,RPS5,RPS29,RPLP0,RPL6,RPS24,RPLP1,RPL8,RPL9,RPS27,FAU,RPS20,RPL27A,RPL30,RPL7,RPL4,RPS9,RPL22,RPL37,RPL38,RPL10,RPL32,RPL35,RPL29,RPL10A,RPS25,RPL13,RPS28,RPL15,RPL11,RPL12,RPS6,RPL14,RPL18A,RPL39,RPL23,RPL23A,RPS23,RPL3,RPL34,RPL35A,RPL36,RPL36A,RPL31,RPL37A,RPL41,RPL5,RPL7A,RPL24,RPLP2,RPS17,RPS18,RPS19,RPS2,RPS21,RPS27A,RPS3,…
GO:BP	cellular respiration	GO:0045333	8.40754e-57	56.0753	191	1126	93	17847	NDUFB10,COX5B,NDUFA4,ACTN3,ADSL,COX6A2,NDUFB4,ALDH5A1,MDH2,COX7C,NDUFC2,NDUFA8,NDUFV2,UQCRC1,COX4I1,BLOC1S1,NDUFB11,CISD1,COQ10A,COX3,COX6C,COX7A2L,CS,CYC1,CYCS,COX6B1,DLAT,DLST,UQCRH,NDUFB7,UQCRFS1,NDUFB2,IDH2,ETFB,ETFDH,NDUFB9,UQCR11,FH,NDUFB3,UQCR10,UQCRQ,GPD1,NDUFS3,NDUFA1,COQ9,ISCU,MDH1,COX7B,NDUFAB1,MTFR1L,NDUFS7,ND4,NDUFA10,UQCRB,NDUFA3,NDUFA5,NDUFA6,NDUFA7,NDUFB1,NDUFA2,NDUFC1,NDUFS1,NDUF…
GO:BP	translational initiation	GO:0006413	1.11013e-56	55.9546	196	1126	94	17847	EIF3K,EIF1,EIF4A2,RPL21,RPS11,RPS4Y1,RPS14,RPL27,UBA52,CDC123,RPS15A,RPS16,RPL13A,RPS15,RPS3A,RPS5,RPS29,RPLP0,DDX3X,RPL6,RPS24,EIF3F,RPLP1,RPL8,RPL9,EIF1AX,EIF1B,EIF2D,EIF3E,EIF3H,EIF4G1,EIF3L,RPS27,FAU,RPS20,RPL27A,RPL30,RPL7,RPL4,RPS9,RPL22,RPL37,RPL38,RPL10,RPL32,RPL35,RPL29,RPL10A,MTIF2,MTIF3,NCK2,ATF4,EIF3G,RPS25,RPL13,RPS28,RPL15,EIF1AY,RPL11,RPL12,RPS6,RPL14,RPL18A,RPL39,RPL23,RPL23A,RPS2…
GO:BP	energy derivation by oxidation of organic compounds	GO:0015980	2.00397e-55	54.6981	287	1126	111	17847	NDUFB10,ACADM,ACADVL,COX5B,NDUFA4,ACTN3,ADSL,COX6A2,NDUFB4,ALDH5A1,MDH2,COX7C,NDUFC2,NDUFA8,NDUFV2,UQCRC1,COX4I1,PPP1R3C,BLOC1S1,NDUFB11,CISD1,PFKM,COQ10A,COX3,COX6C,COX7A2L,CS,CYC1,CYCS,COX6B1,PGM1,DLAT,DLST,DYRK2,UQCRH,NDUFB7,UQCRFS1,NDUFB2,IDH2,ETFB,ETFDH,NDUFB9,UQCR11,FH,NDUFB3,UQCR10,UQCRQ,GBE1,GNAS,GPD1,NDUFS3,NDUFA1,COQ9,AGL,ISCU,MDH1,COX7B,NDUFAB1,MTFR1L,NDUFS7,ND4,PYGM,NDUFA10,UQCRB,NDUF…
GO:BP	protein localization to endoplasmic reticulum	GO:0070972	1.94128e-51	50.7119	137	1126	76	17847	RPL21,RPS11,RPS4Y1,RPS14,RPL27,UBA52,RPS15A,RPS16,RPL13A,RPS15,RPS3A,RPS5,RPS29,RPLP0,RPL6,RPS24,RPLP1,RPL8,RPL9,RPS27,FAU,RPS20,RPL27A,RPL30,RPL7,RPL4,RPS9,RPL22,RPL37,RPL38,RPL10,RPL32,RPL35,RPL29,RPL10A,RTN4,RPS25,RPL13,RPS28,RPL15,RPL11,RPL12,RPS6,RPL14,RPL18A,RPL39,RPL23,RPL23A,RPS23,RPL3,RPL34,RPL35A,RPL36,RPL36A,RPL31,RPL37A,RPL41,RPL5,RPL7A,RPL24,RPLP2,RPS17,RPS18,RPS19,RPS2,RPS21,RPS27A,…
GO:BP	generation of precursor metabolites and energy	GO:0006091	6.04708e-49	48.2185	543	1126	144	17847	NDUFB10,ACADM,TPI1,ACADVL,COX5B,NDUFA4,ACTN3,ADSL,COX6A2,NDUFB4,ALDH5A1,MDH2,COX7C,NDUFC2,APOPT1,APP,NDUFA8,NDUFV2,UQCRC1,PGAM2,COX4I1,ATP6,PPP1R3C,BLOC1S1,NDUFB11,CISD1,PFKM,COQ10A,COX17,COX3,COX6C,COX7A2,COX7A2L,CS,CYC1,CYCS,DDIT4,COX6B1,PGM1,DLAT,DLST,SLC25A4,DYRK2,UQCRH,NDUFB7,UQCRFS1,NDUFB2,IDH2,ETFB,ETFDH,NDUFB9,UQCR11,FH,NDUFB3,UQCR10,UQCRQ,GAPDH,GBE1,GLRX5,GNAS,GPD1,NDUFS3,NDUFA1,COQ9,HK2…
GO:BP	respiratory electron transport chain	GO:0022904	6.01623e-46	45.2207	118	1126	67	17847	NDUFB10,COX5B,NDUFA4,COX6A2,NDUFB4,ALDH5A1,COX7C,NDUFC2,NDUFA8,NDUFV2,UQCRC1,COX4I1,NDUFB11,COX3,COX6C,COX7A2L,CYC1,CYCS,COX6B1,UQCRH,NDUFB7,UQCRFS1,NDUFB2,ETFB,ETFDH,NDUFB9,UQCR11,NDUFB3,UQCR10,UQCRQ,GPD1,NDUFS3,NDUFA1,COQ9,ISCU,COX7B,NDUFAB1,NDUFS7,ND4,NDUFA10,UQCRB,NDUFA3,NDUFA5,NDUFA6,NDUFA7,NDUFB1,NDUFA2,NDUFC1,NDUFS1,NDUFS2,NDUFS4,NDUFS5,NDUFV1,UQCRC2,PINK1,PPARGC1A,COX8A,COX5A,NDUFA9,NDUFS…
GO:BP	oxidation-reduction process	GO:0055114	3.69508e-45	44.4324	1026	1126	198	17847	NDUFB10,ABCD3,ACAD11,ACADM,TPI1,ACADVL,COX5B,NDUFA4,ACTN3,ADIPOR1,ADSL,AIFM1,COX6A2,NDUFB4,ALDH5A1,MDH2,COX7C,NDUFC2,DHRS7C,NDUFA8,NDUFV2,UQCRC1,PGAM2,COX4I1,AUH,PPP1R3C,BLOC1S1,BLVRB,NDUFB11,CARNS1,ALKBH5,CISD1,PFKM,COQ10A,COX3,COX6C,COX7A2,COX7A2L,MGST3,CRAT,CS,CYC1,CYB561A3,CYB5R1,CYCS,DCXR,DECR1,DECR2,COX6B1,DHRS4,PGM1,DLAT,DLST,DYRK2,UQCRH,ECHDC2,ECHS1,ECI2,NDUFB7,UQCRFS1,NDUFB2,IDH2,ETFB,ET…
GO:BP	mitochondrial ATP synthesis coupled electron transport	GO:0042775	1.25585e-43	42.9011	98	1126	60	17847	NDUFB10,COX5B,NDUFA4,COX6A2,NDUFB4,COX7C,NDUFC2,NDUFA8,NDUFV2,UQCRC1,COX4I1,NDUFB11,COX3,COX6C,COX7A2L,CYC1,CYCS,COX6B1,UQCRH,NDUFB7,UQCRFS1,NDUFB2,NDUFB9,UQCR11,NDUFB3,UQCR10,UQCRQ,NDUFS3,NDUFA1,COQ9,ISCU,COX7B,NDUFAB1,NDUFS7,ND4,NDUFA10,UQCRB,NDUFA3,NDUFA5,NDUFA6,NDUFA7,NDUFB1,NDUFA2,NDUFC1,NDUFS1,NDUFS2,NDUFS4,NDUFS5,NDUFV1,UQCRC2,PINK1,COX8A,COX5A,NDUFA9,NDUFS6,NDUFB6,SDHA,SDHC,SDHD,NDUFA13
GO:BP	ATP synthesis coupled electron transport	GO:0042773	2.99973e-43	42.5229	99	1126	60	17847	NDUFB10,COX5B,NDUFA4,COX6A2,NDUFB4,COX7C,NDUFC2,NDUFA8,NDUFV2,UQCRC1,COX4I1,NDUFB11,COX3,COX6C,COX7A2L,CYC1,CYCS,COX6B1,UQCRH,NDUFB7,UQCRFS1,NDUFB2,NDUFB9,UQCR11,NDUFB3,UQCR10,UQCRQ,NDUFS3,NDUFA1,COQ9,ISCU,COX7B,NDUFAB1,NDUFS7,ND4,NDUFA10,UQCRB,NDUFA3,NDUFA5,NDUFA6,NDUFA7,NDUFB1,NDUFA2,NDUFC1,NDUFS1,NDUFS2,NDUFS4,NDUFS5,NDUFV1,UQCRC2,PINK1,COX8A,COX5A,NDUFA9,NDUFS6,NDUFB6,SDHA,SDHC,SDHD,NDUFA13
GO:BP	viral gene expression	GO:0019080	1.9493e-42	41.7101	195	1126	81	17847	RPL21,RPS11,RPS4Y1,RPS14,RPL27,UBA52,RPS15A,RPS16,RPL13A,RPS15,RPS3A,RPS5,RPS29,RPLP0,RPL6,RPS24,EIF3F,RPLP1,RPL8,RPL9,EIF2D,EIF3L,RPS27,FAU,RPS20,RPL27A,RPL30,RPL7,RPL4,RPS9,RPL22,POLR2I,RPL37,RPL38,RPL10,RPL32,RPL35,RPL29,RPL10A,EIF3G,RPS25,RPL13,RPS28,RPL15,POLR2J,POLR2L,RPL11,RPL12,RPS6,RPL14,RPL18A,RPL39,RPL23,RPL23A,RPS23,RPL3,RPL34,RPL35A,RPL36,RPL36A,RPL31,RPL37A,RPL41,RPL5,RPL7A,RPL24,RP…
GO:BP	viral transcription	GO:0019083	8.98003e-42	41.0467	178	1126	77	17847	RPL21,RPS11,RPS4Y1,RPS14,RPL27,UBA52,RPS15A,RPS16,RPL13A,RPS15,RPS3A,RPS5,RPS29,RPLP0,RPL6,RPS24,RPLP1,RPL8,RPL9,RPS27,FAU,RPS20,RPL27A,RPL30,RPL7,RPL4,RPS9,RPL22,POLR2I,RPL37,RPL38,RPL10,RPL32,RPL35,RPL29,RPL10A,RPS25,RPL13,RPS28,RPL15,POLR2J,POLR2L,RPL11,RPL12,RPS6,RPL14,RPL18A,RPL39,RPL23,RPL23A,RPS23,RPL3,RPL34,RPL35A,RPL36,RPL36A,RPL31,RPL37A,RPL41,RPL5,RPL7A,RPL24,RPLP2,RPS17,RPS18,RPS19,RP…
GO:BP	oxidative phosphorylation	GO:0006119	7.90383e-41	40.1022	144	1126	69	17847	NDUFB10,COX5B,NDUFA4,ACTN3,COX6A2,NDUFB4,COX7C,NDUFC2,NDUFA8,NDUFV2,UQCRC1,COX4I1,ATP6,NDUFB11,COX3,COX6C,COX7A2L,CYC1,CYCS,COX6B1,UQCRH,NDUFB7,UQCRFS1,NDUFB2,NDUFB9,UQCR11,NDUFB3,UQCR10,UQCRQ,NDUFS3,NDUFA1,COQ9,ISCU,COX7B,NDUFAB1,NDUFS7,ND4,NDUFA10,UQCRB,NDUFA3,NDUFA5,NDUFA6,NDUFA7,NDUFB1,NDUFA2,NDUFC1,NDUFS1,NDUFS2,NDUFS4,NDUFS5,NDUFV1,UQCRC2,NUPR1,COX7A1,ATP5J,PGK1,PINK1,PPIF,COX8A,ATP5G1,COX5…
GO:BP	protein targeting to membrane	GO:0006612	2.39469e-40	39.6208	195	1126	79	17847	RPL21,RPS11,RPS4Y1,RPS14,RPL27,UBA52,RPS15A,RPS16,RPL13A,RPS15,RPS3A,RPS5,RPS29,RPLP0,RPL6,RPS24,RPLP1,RPL8,RPL9,RPS27,FAU,RPS20,FIS1,RPL27A,RPL30,GDI1,RPL7,RPL4,RPS9,RPL22,RPL37,RPL38,RPL10,RPL32,RPL35,RPL29,RPL10A,RPS25,RPL13,RPS28,RPL15,ZDHHC7,RPL11,RPL12,RPS6,RPL14,RPL18A,RPL39,RPL23,RPL23A,RPS23,RPL3,RPL34,RPL35A,RPL36,RPL36A,RPL31,RPL37A,RPL41,RPL5,RPL7A,RPL24,RPLP2,RPS17,RPS18,RPS19,RPS2,R…
GO:BP	electron transport chain	GO:0022900	1.13545e-39	38.9448	188	1126	77	17847	NDUFB10,COX5B,NDUFA4,COX6A2,NDUFB4,ALDH5A1,COX7C,NDUFC2,NDUFA8,NDUFV2,UQCRC1,COX4I1,NDUFB11,COX3,COX6C,COX7A2,COX7A2L,CYC1,CYCS,COX6B1,UQCRH,NDUFB7,UQCRFS1,NDUFB2,ETFB,ETFDH,NDUFB9,UQCR11,NDUFB3,UQCR10,UQCRQ,GLRX5,GPD1,NDUFS3,NDUFA1,COQ9,ISCU,AKR7A2,MAOB,COX7B,NDUFAB1,NDUFS7,ND4,NDUFA10,UQCRB,NDUFA3,NDUFA5,NDUFA6,NDUFA7,NDUFB1,NDUFA2,NDUFC1,NDUFS1,NDUFS2,NDUFS4,NDUFS5,NDUFV1,UQCRC2,NQO2,COX7A1,PI…
GO:BP	nuclear-transcribed mRNA catabolic process	GO:0000956	2.52088e-39	38.5984	211	1126	81	17847	RPL21,RPS11,RPS4Y1,RPS14,RPL27,UBA52,RPS15A,RPS16,RPL13A,RPS15,RPS3A,CSDE1,RPS5,RPS29,RPLP0,RPL6,RPS24,RPLP1,RPL8,RPL9,EIF3E,EIF4G1,RPS27,FAU,RPS20,RPL27A,RPL30,RPL7,RPL4,RPS9,RPL22,RPL37,RPL38,RPL10,RPL32,RPL35,RPL29,RPL10A,RPS25,RPL13,RPS28,RPL15,PPP2R1A,RPL11,RPL12,RPS6,RPL14,RPL18A,RPL39,RPL23,RPL23A,RPS23,RPL3,RPL34,RPL35A,RPL36,RPL36A,RPL31,RPL37A,RPL41,RPL5,RPL7A,RPL24,RPLP2,RPS17,RPS18,RP…
GO:BP	protein targeting	GO:0006605	2.17898e-37	36.6617	428	1126	113	17847	RPL21,RPS11,RPS4Y1,RPS14,RPL27,UBA52,RPS15A,RPS16,RPL13A,RPS15,RPS3A,CRAT,RPS5,RPS29,RPLP0,DECR2,DHRS4,RPL6,RPS24,RPLP1,RPL8,RPL9,ECI2,RPS27,FAU,RPS20,FIS1,RPL27A,GABARAP,RPL30,GDI1,GNPAT,RPL7,GSTK1,RPL4,SAMM50,HSPA8,HUWE1,IMMP1L,RPS9,RPL22,RPL37,RPL38,RPL10,RPL32,RPL35,MFN2,MLYCD,RPL29,RPL10A,NCOA4,NEDD4,UQCRC2,RPS25,OXA1L,RPL13,RPS28,PAM16,PEX2,RPL15,PHYH,PINK1,PMPCB,ZDHHC7,ROMO1,RPL11,RPL12,RP…
GO:BP	ATP metabolic process	GO:0046034	1.4921e-36	35.8262	306	1126	94	17847	NDUFB10,TPI1,COX5B,NDUFA4,ACTN3,AK1,COX6A2,NDUFB4,COX7C,NDUFC2,APP,NDUFA8,ATP1A2,NDUFV2,UQCRC1,PGAM2,COX4I1,ATP6,NDUFB11,PFKM,COX3,COX6C,COX7A2L,CYC1,CYCS,DDIT4,COX6B1,PGM1,UQCRH,NDUFB7,UQCRFS1,NDUFB2,NDUFB9,UQCR11,NDUFB3,UQCR10,UQCRQ,GAPDH,GPD1,NDUFS3,NDUFA1,COQ9,HK2,HSPA1A,HSPA8,ISCU,JMJD8,ENO3,COX7B,NDUFAB1,MYH4,MYH6,MYH7,NDUFS7,ND4,NDUFA10,UQCRB,NDUFA3,NDUFA5,NDUFA6,NDUFA7,NDUFB1,NDUFA2,NDUFC…
GO:BP	translation	GO:0006412	3.95779e-35	34.4025	730	1126	148	17847	EIF3K,EIF1,EIF4A2,MRPS7,APP,RPL21,COA3,RPS11,RPS4Y1,RPS14,RPL27,YBX3,UBA52,EEF1D,CDC123,RPS15A,RPS16,RPL13A,RPL3L,EEF2,RPS15,RPS3A,RPS5,CYFIP1,RPS29,RPLP0,DDX3X,RPL6,RPS24,EIF3F,EEF1G,RPLP1,RPL8,RPL9,EEF1A1,EEF1A2,EEF2K,EIF1AX,EIF1B,EIF2D,EIF3E,EIF3H,EIF4G1,EIF5A,EIF3L,EPRS,RPS27,FAU,RPS20,FXR2,RPL27A,GAPDH,RPL30,GGT7,MRPL33,RPL7,RPL4,NGRN,RPS9,AURKAIP1,RPL22,RPL37,RPL38,RPL10,RPL32,LRPPRC,RPL35,…
GO:BP	amide biosynthetic process	GO:0043604	1.3756e-34	33.8615	897	1126	166	17847	EIF3K,ACSL1,EIF1,EIF4A2,MRPS7,APP,RPL21,COA3,ASNSD1,RPS11,RPS4Y1,RPS14,RPL27,YBX3,UBA52,EEF1D,CARNS1,CDC123,RPS15A,RPS16,RPL13A,RPL3L,EEF2,RPS15,RPS3A,RPS5,CYFIP1,RPS29,RPLP0,DDX3X,RPL6,RPS24,DLAT,EIF3F,EEF1G,RPLP1,RPL8,RPL9,EEF1A1,EEF1A2,EEF2K,EIF1AX,EIF1B,EIF2D,EIF3E,EIF3H,EIF4G1,EIF5A,EIF3L,EPRS,RPS27,FAU,RPS20,FXR2,RPL27A,GAPDH,RPL30,GGT7,MRPL33,RPL7,HAGH,RPL4,NGRN,HSD17B12,RPS9,AURKAIP1,RPL2…
GO:BP	peptide biosynthetic process	GO:0043043	1.43154e-34	33.8442	755	1126	150	17847	EIF3K,EIF1,EIF4A2,MRPS7,APP,RPL21,COA3,RPS11,RPS4Y1,RPS14,RPL27,YBX3,UBA52,EEF1D,CARNS1,CDC123,RPS15A,RPS16,RPL13A,RPL3L,EEF2,RPS15,RPS3A,RPS5,CYFIP1,RPS29,RPLP0,DDX3X,RPL6,RPS24,EIF3F,EEF1G,RPLP1,RPL8,RPL9,EEF1A1,EEF1A2,EEF2K,EIF1AX,EIF1B,EIF2D,EIF3E,EIF3H,EIF4G1,EIF5A,EIF3L,EPRS,RPS27,FAU,RPS20,FXR2,RPL27A,GAPDH,RPL30,GGT7,MRPL33,RPL7,HAGH,RPL4,NGRN,RPS9,AURKAIP1,RPL22,RPL37,RPL38,RPL10,RPL32,L…
GO:BP	peptide metabolic process	GO:0006518	2.022e-32	31.6942	895	1126	162	17847	EIF3K,EIF1,AEBP1,ALDH5A1,EIF4A2,MRPS7,APP,RPL21,COA3,RPS11,RPS4Y1,RPS14,RPL27,BECN1,YBX3,UBA52,EEF1D,CARNS1,CDC123,RPS15A,RPS16,RPL13A,RPL3L,EEF2,RPS15,RPS3A,CPE,CPXM2,RPS5,CYFIP1,RPS29,RPLP0,DDX3X,RPL6,RPS24,EIF3F,EEF1G,RPLP1,RPL8,RPL9,EEF1A1,EEF1A2,EEF2K,PCSK4,EIF1AX,EIF1B,EIF2D,EIF3E,EIF3H,EIF4G1,EIF5A,BIN1,EIF3L,EPRS,RPS27,FAU,RPS20,FXR2,RPL27A,GAPDH,RPL30,GGT7,MRPL33,GPX4,RPL7,GSTK1,GSTP1,HA…
GO:BP	cellular amide metabolic process	GO:0043603	2.34439e-31	30.63	1163	1126	188	17847	EIF3K,ACOT1,ACOT13,ACSL1,EIF1,AEBP1,ALDH5A1,EIF4A2,MRPS7,APP,RPL21,COA3,ASNSD1,RPS11,RPS4Y1,RPS14,RPL27,BECN1,YBX3,UBA52,EEF1D,CARNS1,CDC123,RPS15A,RPS16,RPL13A,RPL3L,EEF2,RPS15,RPS3A,CPE,CPXM2,RPS5,CYFIP1,RPS29,DBI,RPLP0,DDX3X,RPL6,RPS24,DLAT,DLST,EIF3F,EEF1G,RPLP1,RPL8,RPL9,EEF1A1,EEF1A2,EEF2K,PCSK4,EIF1AX,EIF1B,EIF2D,EIF3E,EIF3H,EIF4G1,EIF5A,BIN1,EIF3L,EPRS,RPS27,FAU,RPS20,FXR2,RPL27A,GAPDH,RP…
GO:BP	mRNA catabolic process	GO:0006402	8.8976e-30	29.0507	371	1126	95	17847	RPL21,RPS11,RPS4Y1,RPS14,RPL27,YBX3,UBA52,YBX1,ALKBH5,RPS15A,RPS16,RPL13A,RPS15,RPS3A,CSDE1,RPS5,RPS29,RPLP0,RPL6,RPS24,RPLP1,RPL8,RPL9,EIF3E,EIF4G1,RPS27,FAU,RPS20,FXR2,RPL27A,RPL30,RPL7,RPL4,HSPA1A,HSPA8,RPS9,RPL22,RPL37,RPL38,RPL10,RPL32,RPL35,MAPKAPK2,RPL29,RPL10A,RPS25,RPL13,RPS28,RPL15,PPP2R1A,PSMB1,PSMB5,PSMB6,PSME4,RBM38,RPL11,RPL12,RPS6,RPL14,RPL18A,RPL39,RPL23,RPL23A,RPS23,RPL3,RPL34,RP…
GO:BP	establishment of protein localization to membrane	GO:0090150	8.11086e-29	28.0909	330	1126	88	17847	RPL21,RPS11,RPS4Y1,RPS14,RPL27,BAG6,UBA52,RPS15A,RPS16,CLSTN1,RPL13A,RPS15,RPS3A,RPS5,RPS29,RPLP0,RPL6,RPS24,RPLP1,RPL8,RPL9,RPS27,FAU,RPS20,FIS1,RPL27A,RPL30,GDI1,GOLGA4,RPL7,RPL4,SAMM50,RPS9,RPL22,RPL37,RPL38,RPL10,RPL32,RPL35,RPL29,RPL10A,RPS25,OXA1L,RPL13,RPS28,RPL15,ZDHHC7,RFTN1,ROMO1,RPL11,RPL12,RPS6,RPL14,RPL18A,RPL39,RPL23,RPL23A,RPS23,RPL3,RPL34,RPL35A,RPL36,RPL36A,RPL31,RPL37A,RPL41,RPL…
GO:BP	establishment of protein localization to organelle	GO:0072594	1.5123e-28	27.8204	565	1126	118	17847	RPL21,RPS11,RPS4Y1,RPS14,RPL27,UBA52,RPS15A,RPS16,RPL13A,RPS15,RPS3A,CRAT,RPS5,RPS29,RPLP0,DECR2,DHRS4,RPL6,RPS24,RPLP1,RPL8,RPL9,ECI2,GSG1L,RPS27,FAU,RPS20,FIS1,RPL27A,RPL30,GNPAT,RPL7,GSTK1,RPL4,HK2,SAMM50,HSPA8,HUWE1,IMMP1L,IPO13,RPS9,RPL22,RPL37,RPL38,RPL10,RPL32,RPL35,MFN2,MLYCD,RPL29,RPL10A,NCOA4,PHB2,NEDD4,UQCRC2,RPS25,OXA1L,RPL13,RPS28,PAM16,PEX2,RPL15,PHYH,PIH1D1,PIK3R1,PINK1,PMPCB,ROMO1…
GO:BP	RNA catabolic process	GO:0006401	1.22507e-27	26.9118	408	1126	97	17847	RPL21,RPS11,RPS4Y1,RPS14,RPL27,YBX3,UBA52,YBX1,ALKBH5,RPS15A,RPS16,RPL13A,RPS15,RPS3A,CSDE1,RPS5,RPS29,RPLP0,RPL6,RPS24,RPLP1,RPL8,RPL9,EIF3E,EIF4G1,RPS27,FAU,RPS20,FXR2,RPL27A,RPL30,GRSF1,RPL7,RPL4,HSPA1A,HSPA8,RPS9,RPL22,RPL37,RPL38,RPL10,RPL32,LRPPRC,RPL35,MAPKAPK2,RPL29,RPL10A,RPS25,RPL13,RPS28,RPL15,PPP2R1A,PSMB1,PSMB5,PSMB6,PSME4,RBM38,RPL11,RPL12,RPS6,RPL14,RPL18A,RPL39,RPL23,RPL23A,RPS23,…
GO:BP	mitochondrial electron transport, NADH to ubiquinone	GO:0006120	2.24361e-26	25.6491	56	1126	36	17847	NDUFB10,NDUFA4,NDUFB4,NDUFC2,NDUFA8,NDUFV2,NDUFB11,NDUFB7,NDUFB2,NDUFB9,NDUFB3,NDUFS3,NDUFA1,COQ9,ISCU,NDUFAB1,NDUFS7,ND4,NDUFA10,NDUFA3,NDUFA5,NDUFA6,NDUFA7,NDUFB1,NDUFA2,NDUFC1,NDUFS1,NDUFS2,NDUFS4,NDUFS5,NDUFV1,PINK1,NDUFA9,NDUFS6,NDUFB6,NDUFA13
GO:BP	mitochondrial respiratory chain complex I assembly	GO:0032981	1.00736e-25	24.9968	65	1126	38	17847	NDUFB10,NDUFB4,NDUFC2,NDUFA8,NDUFV2,BCS1L,NDUFB11,NDUFB7,NDUFB2,NDUFB9,NDUFB3,FOXRED1,NDUFS3,NDUFA1,NDUFAB1,NDUFS7,ND4,NDUFA10,NDUFA3,NDUFA5,NDUFA6,NDUFA7,NDUFAF3,NDUFAF5,NDUFB1,NDUFA2,NDUFC1,NDUFS1,NDUFS2,NDUFS4,NDUFS5,NDUFV1,OXA1L,NDUFA9,NDUFS6,NDUFB6,NDUFA13,ECSIT
GO:BP	NADH dehydrogenase complex assembly	GO:0010257	1.00736e-25	24.9968	65	1126	38	17847	NDUFB10,NDUFB4,NDUFC2,NDUFA8,NDUFV2,BCS1L,NDUFB11,NDUFB7,NDUFB2,NDUFB9,NDUFB3,FOXRED1,NDUFS3,NDUFA1,NDUFAB1,NDUFS7,ND4,NDUFA10,NDUFA3,NDUFA5,NDUFA6,NDUFA7,NDUFAF3,NDUFAF5,NDUFB1,NDUFA2,NDUFC1,NDUFS1,NDUFS2,NDUFS4,NDUFS5,NDUFV1,OXA1L,NDUFA9,NDUFS6,NDUFB6,NDUFA13,ECSIT
GO:BP	aerobic respiration	GO:0009060	1.13404e-25	24.9454	90	1126	44	17847	COX5B,NDUFA4,ACTN3,ADSL,COX6A2,MDH2,COX7C,UQCRC1,COX4I1,BLOC1S1,COX3,COX6C,COX7A2L,CS,CYCS,COX6B1,DLAT,DLST,UQCRH,IDH2,FH,UQCR10,MDH1,COX7B,MTFR1L,NDUFS7,ND4,UQCRB,NNT,UQCRC2,OGDH,OXA1L,PDHA1,PDHB,COX8A,COX5A,SDHB,SDHA,SDHC,SDHD,ACO2,SUCLA2,SUCLG1,SUCLG2
GO:BP	aromatic compound catabolic process	GO:0019439	6.08791e-25	24.2155	607	1126	117	17847	AIFM1,RPL21,RPS11,RPS4Y1,RPS14,RPL27,BLVRB,YBX3,UBA52,YBX1,CARNS1,ALKBH5,RPS15A,RPS16,RPL13A,RPS15,RPS3A,CSDE1,RPS5,RPS29,RPLP0,RPL6,RPS24,RPLP1,RPL8,RPL9,EIF3E,EIF4G1,EPHX1,RPS27,FAU,RPS20,FXR2,RPL27A,RPL30,GDA,GRSF1,RPL7,RPL4,HSPA1A,HSPA8,RPS9,ENDOG,RPL22,RPL37,RPL38,RPL10,RPL32,LRPPRC,RPL35,LRTOMT,MAOA,MAOB,MAPKAPK2,MLYCD,RPL29,RPL10A,MTHFS,NT5C1A,NUDT17,NUDT3,RPS25,RPL13,RPS28,PDE4B,PAM16,RPL…
GO:BP	mitochondrial respiratory chain complex assembly	GO:0033108	1.40566e-24	23.8521	99	1126	45	17847	NDUFB10,NDUFB4,NDUFC2,APOPT1,COA3,NDUFA8,NDUFV2,BCS1L,NDUFB11,COX17,NDUFB7,NDUFB2,NDUFB9,NDUFB3,UQCR10,FOXRED1,NDUFS3,NDUFA1,SAMM50,NDUFAB1,NDUFS7,ND4,NDUFA10,UQCRB,NDUFA3,NDUFA5,NDUFA6,NDUFA7,NDUFAF3,NDUFAF5,NDUFB1,NDUFA2,NDUFC1,NDUFS1,NDUFS2,NDUFS4,NDUFS5,NDUFV1,OXA1L,PET100,NDUFA9,NDUFS6,NDUFB6,NDUFA13,ECSIT
GO:BP	nucleobase-containing compound catabolic process	GO:0034655	1.63313e-24	23.787	544	1126	109	17847	AIFM1,RPL21,RPS11,RPS4Y1,RPS14,RPL27,YBX3,UBA52,YBX1,ALKBH5,RPS15A,RPS16,RPL13A,RPS15,RPS3A,CSDE1,RPS5,RPS29,RPLP0,RPL6,RPS24,RPLP1,RPL8,RPL9,EIF3E,EIF4G1,RPS27,FAU,RPS20,FXR2,RPL27A,RPL30,GDA,GRSF1,RPL7,RPL4,HSPA1A,HSPA8,RPS9,ENDOG,RPL22,RPL37,RPL38,RPL10,RPL32,LRPPRC,RPL35,MAPKAPK2,MLYCD,RPL29,RPL10A,NT5C1A,NUDT17,NUDT3,RPS25,RPL13,RPS28,PDE4B,PAM16,RPL15,PPP2R1A,PSMB1,PSMB5,PSMB6,PSME4,RBM38,R…
GO:BP	cellular nitrogen compound catabolic process	GO:0044270	1.32918e-23	22.8764	592	1126	113	17847	AIFM1,RPL21,RPS11,RPS4Y1,RPS14,RPL27,BLVRB,YBX3,UBA52,YBX1,CARNS1,ALKBH5,RPS15A,RPS16,RPL13A,RPS15,RPS3A,CSDE1,RPS5,RPS29,RPLP0,RPL6,RPS24,RPLP1,RPL8,RPL9,EIF3E,EIF4G1,RPS27,FAU,RPS20,FXR2,RPL27A,RPL30,GDA,GRSF1,RPL7,RPL4,HSPA1A,HSPA8,RPS9,ENDOG,RPL22,RPL37,RPL38,RPL10,RPL32,LRPPRC,RPL35,MAPKAPK2,MLYCD,MPST,RPL29,RPL10A,MTHFS,NT5C1A,NUDT17,NUDT3,RPS25,RPL13,RPS28,PDE4B,PAM16,RPL15,PPP2R1A,PSMB1,P…
GO:BP	heterocycle catabolic process	GO:0046700	4.33255e-23	22.3633	591	1126	112	17847	AIFM1,RPL21,RPS11,RPS4Y1,RPS14,RPL27,BLVRB,YBX3,UBA52,YBX1,CARNS1,ALKBH5,RPS15A,RPS16,RPL13A,RPS15,RPS3A,CSDE1,RPS5,RPS29,RPLP0,RPL6,RPS24,RPLP1,RPL8,RPL9,EIF3E,EIF4G1,RPS27,FAU,RPS20,FXR2,RPL27A,RPL30,GDA,GRSF1,RPL7,RPL4,HSPA1A,HSPA8,RPS9,ENDOG,RPL22,RPL37,RPL38,RPL10,RPL32,LRPPRC,RPL35,MAPKAPK2,MLYCD,RPL29,RPL10A,MTHFS,NT5C1A,NUDT17,NUDT3,RPS25,RPL13,RPS28,PDE4B,PAM16,RPL15,PPP2R1A,PSMB1,PSMB5,…
GO:BP	organic cyclic compound catabolic process	GO:1901361	2.18995e-22	21.6596	638	1126	116	17847	AIFM1,RPL21,RPS11,RPS4Y1,RPS14,RPL27,BLVRB,YBX3,UBA52,YBX1,CARNS1,ALKBH5,RPS15A,RPS16,RPL13A,RPS15,RPS3A,CSDE1,RPS5,RPS29,RPLP0,RPL6,RPS24,RPLP1,RPL8,RPL9,EIF3E,EIF4G1,RPS27,FAU,RPS20,FXR2,RPL27A,RPL30,GDA,GRSF1,RPL7,RPL4,HSPA1A,HSPA8,RPS9,ENDOG,RPL22,RPL37,RPL38,RPL10,RPL32,LRPPRC,RPL35,LRTOMT,MAOA,MAOB,MAPKAPK2,MLYCD,RPL29,RPL10A,MTHFS,NT5C1A,NUDT17,NUDT3,RPS25,RPL13,RPS28,PDE4B,PAM16,RPL15,PPP…
GO:BP	cytoplasmic translation	GO:0002181	5.82947e-22	21.2344	101	1126	43	17847	EIF3K,EIF4A2,YBX3,RPL13A,EEF2,RPS29,RPLP0,RPL6,EIF3F,RPLP1,RPL8,RPL9,EIF2D,EIF3E,EIF3H,EIF4G1,EIF3L,RPL30,RPL22,RPL38,RPL32,RPL29,RPL10A,EIF3G,RPS28,RPL15,RPL11,RPL18A,RPL39,RPS23,RPL35A,RPL36,RPL36A,RPL31,RPL41,RPL24,RPS21,RPSA,RWDD1,CNBP,TMA7,RPL19,EIF3I
GO:BP	organonitrogen compound biosynthetic process	GO:1901566	7.28004e-22	21.1379	1884	1126	233	17847	ABCA1,EIF3K,ACADM,COX5B,ACSL1,EIF1,ADSL,NECAB3,AGMAT,AK1,ALAS1,ALG11,AMPD1,EIF4A2,MRPS7,APP,RPL21,COA3,ASNSD1,RPS11,RPS4Y1,RPS14,RPL27,ATP6,B3GNT9,YBX3,UBA52,EEF1D,CAPN2,CARNS1,CDC123,RPS15A,CHKB,RPS16,CKM,RPL13A,RPL3L,EEF2,ADSSL1,RPS15,MGST3,RPS3A,RPS5,CYC1,NMNAT3,CYFIP1,RPS29,RPLP0,DDOST,DDX3X,RPL6,RPS24,DLAT,EIF3F,EEF1G,RPLP1,RPL8,RPL9,EEF1A1,EEF1A2,EEF2K,EGF,EIF1AX,EIF1B,EIF2D,EIF3E,EIF3H,IDH…
GO:BP	muscle contraction	GO:0006936	1.01635e-19	18.993	359	1126	79	17847	ACTA1,ACTN2,ACTN3,ATP1A2,ATP2A1,PGAM2,CACNA1S,CLCN1,EEF2,CRYAB,CSRP3,CTNNA3,TMOD4,DES,BIN1,TPM2,GPD1L,GSTO1,SCN1B,HRC,HSBP1,HSPB6,SNTA1,KCNJ12,LMOD1,LMOD2,MB,MIR1-2,MYBPC2,MYH1,MYH14,MYH4,MYH6,MYH7,MYL1,MYL12A,MYL12B,MYL2,MYL3,MYLK2,MYLPF,MYOT,CKMT2,FXYD1,NMUR2,NOS1,PDE4B,GAMT,KLHL41,PLN,PPP1R12B,RCSD1,MYOM1,TPM1,CASQ1,SMTN,ATP2A2,NDUFS6,RYR1,SLC6A8,SMPX,SOD1,SORBS1,STAC2,STAC3,MYH2,TCAP,TMEM38A,…
GO:BP	mitochondrion organization	GO:0007005	1.35478e-19	18.8681	530	1126	99	17847	NDUFB10,NDUFB4,ALAS1,NDUFC2,APOPT1,COA3,ATAD3B,NDUFA8,ATG14,ATG2A,ATP2A1,NDUFV2,ATP6,ATPAF1,BCS1L,BECN1,NDUFB11,ESRRA,CHCHD3,CHCHD6,CIDEB,CLUH,COX17,VDAC1,COX7A2L,CYCS,APOO,DNAJA3,SLC25A4,NDUFB7,NDUFB2,NDUFB9,NDUFB3,FIS1,UQCR10,FOXRED1,GABARAP,NDUFS3,NDUFA1,HIGD1A,HK2,HSD17B10,SAMM50,HSPA1A,HUWE1,IMMP1L,CHCHD2,NDUFAB1,MFN2,MIR29B2,MTFR1L,MYH14,NDUFS7,ND4,NDUFA10,UQCRB,NDUFA3,NDUFA5,NDUFA6,NDUFA7,…
GO:BP	protein localization to membrane	GO:0072657	2.93826e-19	18.5319	636	1126	110	17847	ACTN2,ANXA2,RPL21,RPS11,RPS4Y1,RPS14,RPL27,BAG6,UBA52,RPS15A,RPS16,CLSTN1,RPL13A,RPS15,RPS3A,CPE,CSRP3,RPS5,CAPN3,RPS29,RPLP0,RPL6,RPS24,DNAJA3,RPLP1,RPL8,RPL9,EFR3A,RPS27,FAU,RPS20,FIS1,RPL27A,RPL30,GDI1,GOLGA4,RPL7,RPL4,SAMM50,RPS9,RPL22,LHFPL4,LIN7B,RPL37,RPL38,RPL10,RPL32,RPL35,RPL29,RPL10A,MYL12A,NLGN2,RPS25,OXA1L,RPL13,RPS28,RPL15,PIK3R1,ZDHHC7,RFTN1,RHOQ,ROMO1,ANK1,RPL11,RPL12,RPS6,RPL14,R…
GO:BP	cellular catabolic process	GO:0044248	3.91739e-19	18.407	2287	1126	259	17847	ABCD3,ACAD11,ACADM,TPI1,ACADVL,ACSL1,ADRM1,AIFM1,ALDH5A1,AMT,ANAPC1,ANXA2,AP2S1,APOC2,APP,ARAF,RPL21,ATG14,ATG2A,RPS11,RPS4Y1,RPS14,RPL27,ATP6V1G1,ATRAID,AUH,BAG6,HAGHL,BCKDK,BECN1,BIRC2,BLVRB,YBX3,UBA52,YBX1,CALCOCO2,CAPN2,CARNS1,ALKBH5,RPS15A,RPS16,CLPP,PFKM,RPL13A,VDAC1,RPS15,RPS3A,CPTP,CRAT,CSDE1,RPS5,RPS29,RPLP0,DCXR,DECR1,DECR2,PGM1,RPL6,RPS24,DLST,RPLP1,RPL8,RPL9,ECHDC2,ECHS1,ECI2,EEF1A1,E…
GO:BP	muscle filament sliding	GO:0030049	4.62289e-19	18.3351	39	1126	26	17847	ACTA1,ACTN2,ACTN3,DES,TPM2,MYBPC2,MYH4,MYH6,MYH7,MYL1,MYL2,MYL3,MYLK2,TPM1,MYH2,TCAP,TNNC1,TNNC2,TNNI1,TNNI2,TNNT1,TNNT3,NEB,TPM3,TTN,MYBPC1
GO:BP	actin-myosin filament sliding	GO:0033275	4.62289e-19	18.3351	39	1126	26	17847	ACTA1,ACTN2,ACTN3,DES,TPM2,MYBPC2,MYH4,MYH6,MYH7,MYL1,MYL2,MYL3,MYLK2,TPM1,MYH2,TCAP,TNNC1,TNNC2,TNNI1,TNNI2,TNNT1,TNNT3,NEB,TPM3,TTN,MYBPC1
GO:BP	muscle system process	GO:0003012	2.42778e-18	17.6148	470	1126	90	17847	ACTA1,ACTN2,ACTN3,ATP1A2,ATP2A1,PGAM2,BECN1,CACNA1S,CAMK2B,MYOZ1,CLCN1,EEF2,CRYAB,CSRP3,CTNNA3,TMOD4,DES,BIN1,TPM2,FBXO32,GATM,GPD1L,GSTO1,SCN1B,HRC,HSBP1,HSPB6,SNTA1,KCNJ12,LMOD1,LMOD2,PI16,MB,MEF2C,MIR1-2,MYBPC2,MYH1,MYH14,MYH4,MYH6,MYH7,MYL1,MYL12A,MYL12B,MYL2,MYL3,MYLK2,MYLPF,MYOC,MYOT,CKMT2,FXYD1,NMUR2,NOS1,NR4A3,PDE4B,GAMT,KLHL41,PLN,PPARGC1A,PPP1R12B,RCSD1,MYOM1,TPM1,CASQ1,SMTN,ATP2A2,NDUF…
GO:BP	viral process	GO:0016032	1.03592e-17	16.9847	832	1126	127	17847	ACY3,EIF4A2,AP2S1,RPL21,RPS11,RPS4Y1,RPS14,RPL27,BANF1,BECN1,UBA52,CALCOCO2,CARM1,RPS15A,CFH,RPS16,RPL13A,COPB1,COPS7A,VDAC1,RPS15,RPS3A,CRTC2,RPS5,RPS29,RPLP0,DDX3X,RPL6,RPS24,EIF3F,RPLP1,SLC25A4,RPL8,RPL9,EIF2D,EIF4G1,BIN1,EIF3L,EXOC1,RPS27,FAU,RPS20,RPL27A,RPL30,GPS2,RPL7,RPL4,HNRNPA1,HSPA1A,HSPA8,IQGAP1,IST1,KEAP1,RPS9,RPL22,SKP1,POLR2I,RPL37,RPL38,RPL10,RPL32,RPL35,RPL29,RPL10A,LAMTOR5,EIF3G…
GO:BP	protein localization to organelle	GO:0033365	1.57452e-17	16.8029	949	1126	138	17847	ARL2,RPL21,RPS11,RPS4Y1,RPS14,RPL27,BAG6,BECN1,UBA52,YBX1,CARM1,RPS15A,RPS16,RPL13A,RPS15,RPS3A,CPE,CRAT,CSRP3,RPS5,RPS29,RPLP0,DDX3X,DECR2,DHRS4,RPL6,RPS24,RPLP1,RPL8,RPL9,ECI2,GSG1L,EGF,RPS27,FAU,RPS20,FIS1,RPL27A,RPL30,GLUL,GNPAT,RPL7,GSTK1,RPL4,HK2,SAMM50,HSPA8,HUWE1,IMMP1L,IPO13,RPS9,KLHL21,RPL22,SKP1,RPL37,RPL38,RPL10,RPL32,RPL35,LZTS2,MFN2,MLYCD,RPL29,RPL10A,LAMTOR5,NCOA4,RTN4,PHB2,NEDD4,U…
GO:BP	symbiotic process	GO:0044403	4.0292e-17	16.3948	886	1126	131	17847	ACY3,EIF4A2,ANXA2,AP2S1,ARAF,RPL21,RPS11,RPS4Y1,RPS14,RPL27,BANF1,BECN1,UBA52,CALCOCO2,CARM1,RPS15A,CFH,RPS16,RPL13A,COPB1,COPS7A,VDAC1,RPS15,RPS3A,CRTC2,RPS5,RPS29,RPLP0,DDX3X,RPL6,RPS24,EIF3F,RPLP1,SLC25A4,RPL8,RPL9,EIF2D,EIF4G1,BIN1,EIF3L,EXOC1,RPS27,FAU,RPS20,RPL27A,GAPDH,RPL30,GPS2,RPL7,RPL4,HNRNPA1,HSPA1A,HSPA8,IQGAP1,IST1,KEAP1,RPS9,RPL22,SKP1,POLR2I,RPL37,RPL38,RPL10,RPL32,RPL35,RPL29,RPL…
GO:BP	organic substance catabolic process	GO:1901575	9.73261e-17	16.0118	2216	1126	246	17847	ABCD3,ACAD11,ACADM,TPI1,ACADVL,ACTN3,ADRM1,AIFM1,ALDH5A1,AMT,ANAPC1,ANXA2,AP2S1,APOC2,APP,ARAF,RPL21,RPS11,RPS4Y1,PGAM2,RPS14,RPL27,ATRAID,AUH,BAG6,HAGHL,BCKDK,BECN1,BIRC2,BLVRB,YBX3,UBA52,YBX1,CAPN2,CARNS1,ALKBH5,RPS15A,RPS16,CLPP,PFKM,RPL13A,RPS15,RPS3A,CRAT,CSDE1,RPS5,CAPN3,RPS29,RPLP0,DCXR,DDIT4,DECR1,DECR2,PGM1,RPL6,RPS24,DLST,RPLP1,RPL8,RPL9,ECHDC2,ECHS1,ECI2,EEF1A1,EEF1A2,EGF,EIF3E,EIF4G1,…
GO:BP	mRNA metabolic process	GO:0016071	1.8418e-16	15.7348	860	1126	127	17847	AHCYL1,APP,RPL21,RPS11,RPS4Y1,RPS14,RPL27,YBX3,UBA52,YBX1,ALKBH5,RPS15A,RPS16,RPL13A,RPS15,RPS3A,CSDE1,RPS5,RPS29,RPLP0,RPL6,RPS24,RPLP1,RPL8,RPL9,EIF3E,SNRNP25,EIF4G1,RPS27,FAU,RPS20,FXR2,RPL27A,TXNL4A,RPL30,GRSF1,RPL7,RPL4,HNRNPA1,HSPA1A,HSPA8,IWS1,RPS9,AURKAIP1,RPL22,POLR2I,LMO2,RPL37,RPL38,RPL10,RPL32,RPL35,MAPKAPK2,RPL29,RPL10A,ATF4,RPS25,RPL13,PCBP1,RPS28,RPL15,PNN,POLR2J,POLR2L,PPARGC1A,PP…
GO:BP	interspecies interaction between organisms	GO:0044419	1.80333e-15	14.7439	936	1126	132	17847	ACY3,EIF4A2,ANXA2,AP2S1,ARAF,RPL21,RPS11,RPS4Y1,RPS14,RPL27,BANF1,BECN1,UBA52,CALCOCO2,CARM1,RPS15A,CFH,RPS16,RPL13A,COPB1,COPS7A,VDAC1,RPS15,RPS3A,CRTC2,RPS5,RPS29,RPLP0,DDX3X,RPL6,RPS24,EIF3F,RPLP1,SLC25A4,RPL8,RPL9,EIF2D,EIF4G1,BIN1,EIF3L,EXOC1,RPS27,FAU,RPS20,RPL27A,GAPDH,RPL30,GPS2,RPL7,RPL4,HNRNPA1,HSPA1A,HSPA8,IQGAP1,IST1,KEAP1,RPS9,RPL22,SKP1,POLR2I,RPL37,RPL38,RPL10,RPL32,RPL35,RPL29,RPL…
GO:BP	catabolic process	GO:0009056	2.45417e-15	14.6101	2665	1126	277	17847	ABCD3,ACAD11,ACADM,TPI1,ACADVL,ACSL1,ACTN3,ADRM1,AIFM1,ALDH5A1,AMT,ANAPC1,ANXA2,AP2S1,APOC2,APP,ARAF,RPL21,ATG14,ATG2A,RPS11,RPS4Y1,PGAM2,RPS14,RPL27,ATP6V1G1,ATRAID,AUH,BAG6,HAGHL,BCKDK,BECN1,BIRC2,BLVRB,YBX3,UBA52,YBX1,CALCOCO2,CAPN2,CARNS1,ALKBH5,RPS15A,RPS16,CLPP,PFKM,RPL13A,VDAC1,RPS15,RPS3A,CPTP,CRAT,CSDE1,RPS5,CAPN3,RPS29,RPLP0,DCXR,DDIT4,DECR1,DECR2,PGM1,RPL6,RPS24,DLST,RPLP1,RPL8,RPL9,EC…
GO:BP	cellular metabolic process	GO:0044237	8.41994e-15	14.0747	10785	1126	815	17847	NDUFB10,AATK,ABCA1,ABCD3,EIF3K,ACAD11,ACADM,TPI1,ACADVL,COX5B,NDUFA4,ACOT1,ACOT13,ACSL1,ACTN2,ACTN3,ACY3,ACYP2,EIF1,ADIPOR1,ADRM1,ADSL,LMO1,AEBP1,NECAB3,AGMAT,AHCYL1,AIFM1,AK1,AK8,COX6A2,NDUFB4,ALAS1,ALDH5A1,MDH2,ALG11,SP8,COX7C,AMPD1,AMT,ANAPC1,ANAPC13,EIF4A2,ANXA2,AP2S1,NDUFC2,APOC2,MRPS7,APOPT1,APP,ARAF,ARHGEF6,ARID5B,RPL21,ARPP19,ARX,COA3,ASB14,ASH2L,ASNSD1,NDUFA8,ATG14,ATG2A,RPS11,NDUFV2,RPS…
GO:BP	protein-containing complex subunit organization	GO:0043933	4.62906e-13	12.3345	2177	1126	231	17847	NDUFB10,ABCA1,EIF3K,ACOT13,ACTN2,ADD3,ADRM1,ADSL,AEBP1,NDUFB4,ALDH5A1,ANXA2,AP2S1,NDUFC2,APOC2,MRPS7,APOPT1,ARL2,COA3,ASH2L,NDUFA8,ATG14,NDUFV2,RPS14,ATPAF1,BCS1L,BIRC2,NDUFB11,UBA52,C16ORF45,CALCOCO2,CCDC151,CDC123,CENPP,CLPP,PFKM,RPL13A,RPL3L,COPS7A,COX17,COX3,RPS15,COX7A2L,CPTP,CRTC2,CRYAB,RPS5,CAPN3,CUTC,CYFIP1,RPLP0,TMOD4,DCXR,DDIT4,DDX3X,DECR1,DHRS4,RPL6,EIF3F,NDUFB7,EGF,EIF2D,EIF3E,NDUFB2,…
GO:BP	actin-mediated cell contraction	GO:0070252	6.09424e-13	12.2151	121	1126	37	17847	ACTA1,ACTN2,ACTN3,ATP1A2,ATP2A1,CTNNA3,DES,BIN1,TPM2,GPD1L,SCN1B,SNTA1,MIR1-2,MYBPC2,MYH4,MYH6,MYH7,MYL1,MYL2,MYL3,MYLK2,PDE4B,PLN,TPM1,ATP2A2,MYH2,TCAP,TNNC1,TNNC2,TNNI1,TNNI2,TNNT1,TNNT3,NEB,TPM3,TTN,MYBPC1
GO:BP	cellular protein-containing complex assembly	GO:0034622	1.39745e-12	11.8547	1103	1126	140	17847	NDUFB10,EIF3K,ADD3,ADRM1,NDUFB4,AP2S1,NDUFC2,MRPS7,APOPT1,ARL2,COA3,NDUFA8,NDUFV2,RPS14,ATPAF1,BCS1L,NDUFB11,UBA52,CCDC151,CENPP,RPL13A,RPL3L,COPS7A,COX17,COX3,RPS15,COX7A2L,CPTP,CRYAB,RPS5,CYFIP1,RPLP0,TMOD4,DDX3X,RPL6,EIF3F,NDUFB7,EGF,EIF2D,EIF3E,NDUFB2,EIF3H,EIF4G1,BIN1,EIF3L,EPS8,NDUFB9,RPS27,NDUFB3,FHOD3,FKBP1A,UQCR10,FMOD,FOXRED1,TXNL4A,GOLGA2,GPX4,NDUFS3,NDUFA1,HIST1H1C,SAMM50,HSPA1A,LMOD1…
GO:BP	striated muscle contraction	GO:0006941	3.79344e-12	11.421	176	1126	44	17847	ACTN3,ATP1A2,ATP2A1,PGAM2,EEF2,CSRP3,CTNNA3,BIN1,GPD1L,GSTO1,SCN1B,HRC,SNTA1,MB,MIR1-2,MYH14,MYH6,MYH7,MYL1,MYL2,MYL3,MYLK2,NOS1,PDE4B,KLHL41,PLN,RCSD1,TPM1,CASQ1,SMTN,ATP2A2,SMPX,STAC2,STAC3,TCAP,TMEM38A,TNNC1,TNNC2,TNNI1,TNNI2,TNNT1,TNNT3,TTN,NPPA
GO:BP	intracellular transport	GO:0046907	1.00163e-11	10.9993	1759	1126	193	17847	ABCA1,ABCD3,COX5B,ACTN2,ACTR1B,AHCYL1,ANXA2,AP2S1,AP3S1,APP,ARF5,RPL21,ATG14,ATP2A1,RPS11,RPS4Y1,RPS14,RPL27,ATP6,BANF1,BECN1,BLOC1S1,UBA52,ALKBH5,RPS15A,RPS16,RPL13A,COG8,COPB1,RPS15,RPS3A,CRAT,CRYAB,RPS5,CYC1,RPS29,RPLP0,DCTN3,DECR2,DHRS4,RPL6,RPS24,RPLP1,RPL8,RPL9,ECI2,EIF2D,EIF5A,BIN1,FABP3,FAM160A2,RPS27,FAU,RPS20,FHOD1,FIS1,RPL27A,GABARAP,RPL30,GDI1,GNAS,GNPAT,GOLGA2,RPL7,GSTK1,RPL4,HNRNPA1…
GO:BP	metabolic process	GO:0008152	2.08588e-11	10.6807	11612	1126	849	17847	NDUFB10,AATK,ABCA1,ABCD3,EIF3K,ACAD11,ACADM,TPI1,ACADVL,COX5B,NDUFA4,ACOT1,ACOT13,ACSL1,ACTA1,ACTN2,ACTN3,ACY3,ACYP2,ADAMTS1,EIF1,ADIPOR1,ADRM1,ADSL,LMO1,AEBP1,NECAB3,AGMAT,AHCYL1,AIFM1,AK1,AK8,COX6A2,NDUFB4,ALAS1,ALDH5A1,MDH2,ALG11,SP8,COX7C,AMPD1,AMT,ANAPC1,ANAPC13,EIF4A2,ANXA2,AP2S1,NDUFC2,APOC2,APOL3,APOLD1,MRPS7,APOPT1,APP,ARAF,ARHGEF6,ARID5B,RPL21,ARPP19,ARX,COA3,ASB14,DHRS7C,ASH2L,ASNSD1,N…
GO:BP	cellular macromolecule catabolic process	GO:0044265	3.66931e-11	10.4354	1194	1126	144	17847	ADRM1,AIFM1,ANAPC1,ANXA2,AP2S1,ARAF,RPL21,RPS11,RPS4Y1,RPS14,RPL27,ATRAID,BAG6,BIRC2,YBX3,UBA52,YBX1,CAPN2,ALKBH5,RPS15A,RPS16,CLPP,RPL13A,RPS15,RPS3A,CSDE1,RPS5,RPS29,RPLP0,RPL6,RPS24,RPLP1,RPL8,RPL9,EGF,EIF3E,EIF4G1,USP5,RPS27,FAU,FBXW4,RPS20,FXR2,RPL27A,RPL30,GRSF1,RPL7,RPL4,HSPA1A,HSPA8,HUWE1,KEAP1,RPS9,ENDOG,LAPTM4B,RPL22,SKP1,RPL37,RPL38,RPL10,RPL32,LRPPRC,RPL35,MAPK9,MAPKAPK2,RPL29,RPL10A,…
GO:BP	actin filament-based movement	GO:0030048	3.9426e-11	10.4042	143	1126	38	17847	ACTA1,ACTN2,ACTN3,ATP1A2,ATP2A1,CTNNA3,DES,BIN1,TPM2,GPD1L,SCN1B,SNTA1,MIR1-2,MYBPC2,MYH14,MYH4,MYH6,MYH7,MYL1,MYL2,MYL3,MYLK2,PDE4B,PLN,TPM1,ATP2A2,MYH2,TCAP,TNNC1,TNNC2,TNNI1,TNNI2,TNNT1,TNNT3,NEB,TPM3,TTN,MYBPC1
GO:BP	intracellular protein transport	GO:0006886	4.40603e-11	10.356	1162	1126	141	17847	AHCYL1,AP2S1,AP3S1,ARF5,RPL21,RPS11,RPS4Y1,RPS14,RPL27,UBA52,ALKBH5,RPS15A,RPS16,RPL13A,COPB1,RPS15,RPS3A,CRAT,RPS5,RPS29,RPLP0,DECR2,DHRS4,RPL6,RPS24,RPLP1,RPL8,RPL9,ECI2,EIF2D,EIF5A,RPS27,FAU,RPS20,FIS1,RPL27A,GABARAP,RPL30,GDI1,GNPAT,RPL7,GSTK1,RPL4,SAMM50,HSPA8,HUWE1,IFT172,IMMP1L,IPO13,IWS1,RPS9,RPL22,RPL37,RPL38,RPL10,RPL32,RPL35,MFN2,MLYCD,RPL29,RPL10A,NCOA4,PHB2,NEDD4,NPLOC4,UQCRC2,OAZ2,R…
GO:BP	macromolecule catabolic process	GO:0009057	8.56229e-11	10.0674	1431	1126	163	17847	ADRM1,AIFM1,ANAPC1,ANXA2,AP2S1,ARAF,RPL21,RPS11,RPS4Y1,RPS14,RPL27,ATRAID,BAG6,BECN1,BIRC2,YBX3,UBA52,YBX1,CAPN2,ALKBH5,RPS15A,RPS16,CLPP,PFKM,RPL13A,RPS15,RPS3A,CSDE1,RPS5,CAPN3,RPS29,RPLP0,PGM1,RPL6,RPS24,RPLP1,RPL8,RPL9,EEF1A1,EEF1A2,EGF,EIF3E,EIF4G1,USP5,RPS27,FAU,FBXW4,RPS20,FMOD,FXR2,RPL27A,RPL30,GRSF1,RPL7,RPL4,AGL,HSPA1A,HSPA8,HUWE1,KEAP1,RPS9,ENDOG,LAPTM4B,RPL22,SKP1,RPL37,RPL38,RPL10,RP…
GO:BP	tricarboxylic acid cycle	GO:0006099	1.10519e-10	9.95656	36	1126	19	17847	MDH2,CS,DLAT,DLST,IDH2,FH,MDH1,NNT,OGDH,PDHA1,PDHB,SDHB,SDHA,SDHC,SDHD,ACO2,SUCLA2,SUCLG1,SUCLG2
GO:BP	carboxylic acid metabolic process	GO:0019752	3.08798e-10	9.51033	1075	1126	131	17847	ABCD3,ACAD11,ACADM,TPI1,ACADVL,ACOT1,ACSL1,ACTN3,ADIPOR1,AGMAT,ALDH5A1,MDH2,AMT,APOC2,APP,ASNSD1,PGAM2,AUH,HAGHL,BCKDK,CARNS1,CKM,PFKM,ADSSL1,VDAC1,MGST3,CRAT,CS,DCXR,DDIT4,DECR1,DECR2,PGM1,DLAT,DLST,ECHDC2,ECHDC3,ECHS1,ECI2,EGF,IDH2,EPRS,ETFB,ETFDH,FAAH2,FABP3,FH,GAPDH,GATM,GCSH,GGT7,GLUL,GNPAT,GOT1,GPD1,GPT2,GPX4,GSTO1,GSTP1,HADH,HAGH,HIBADH,HK2,HSD17B10,HSD17B12,HYI,JMJD8,ENO3,LDHB,MDH1,ACADS,…
GO:BP	myofibril assembly	GO:0030239	3.89474e-10	9.40952	68	1126	25	17847	ACTA1,ACTN2,MYOZ1,CSRP3,CAPN3,TMOD4,FHOD3,LMOD1,LMOD2,MEF2C,MIR1-2,MYH6,MYL2,MYPN,KLHL41,PRKAR1A,MYOM1,TPM1,CASQ1,SYNPO2L,TCAP,TNNT1,TNNT3,NEB,TTN
GO:BP	small molecule metabolic process	GO:0044281	7.73827e-10	9.11136	1991	1126	205	17847	ABCA1,ABCD3,ACAD11,ACADM,TPI1,ACADVL,COX5B,ACOT1,ACOT13,ACSL1,ACTN3,ADIPOR1,ADSL,AGMAT,AHCYL1,AK1,AK8,ALDH5A1,MDH2,AMPD1,AMT,APOC2,APP,ARPP19,ASNSD1,PGAM2,ATP6,AUH,HAGHL,BCKDK,CARNS1,CKM,CLK2,PFKM,COQ10A,ADSSL1,VDAC1,MGST3,CRAT,CRTC2,CS,CYC1,NMNAT3,DBI,DCXR,DDIT4,DECR1,DECR2,DHRS4,PGM1,DLAT,DLST,DYRK2,ECHDC2,ECHDC3,ECHS1,ECI2,EGF,IDH2,EPHX1,EPRS,ETFB,ETFDH,FAAH2,FABP3,HDLBP,FH,FMOD,FUOM,GAPDH,GAT…
GO:BP	monocarboxylic acid metabolic process	GO:0032787	8.275e-10	9.08223	657	1126	92	17847	ABCD3,ACAD11,ACADM,TPI1,ACADVL,ACOT1,ACSL1,ACTN3,ADIPOR1,ALDH5A1,APOC2,APP,ASNSD1,PGAM2,AUH,HAGHL,CARNS1,CKM,PFKM,VDAC1,CRAT,DCXR,DDIT4,DECR1,DECR2,PGM1,DLAT,ECHDC2,ECHDC3,ECHS1,ECI2,IDH2,ETFB,ETFDH,FAAH2,FABP3,GAPDH,GATM,GNPAT,GPD1,GPX4,GSTP1,HADH,HAGH,HK2,HSD17B12,HYI,JMJD8,ENO3,LDHB,ACADS,NDUFAB1,MID1IP1,MLYCD,MPC1,MTHFS,GPI,CKMT2,NR1D1,NR4A3,NUPR1,OGDH,OSBPL9,PCCB,GAMT,PDHA1,PDHB,PDK2,PDK4,HS…
GO:BP	protein-containing complex assembly	GO:0065003	1.49594e-09	8.82509	1852	1126	193	17847	NDUFB10,ABCA1,EIF3K,ACOT13,ACTN2,ADD3,ADRM1,ADSL,NDUFB4,ALDH5A1,ANXA2,AP2S1,NDUFC2,APOC2,MRPS7,APOPT1,ARL2,COA3,ASH2L,NDUFA8,NDUFV2,RPS14,ATPAF1,BCS1L,BIRC2,NDUFB11,UBA52,CCDC151,CDC123,CENPP,CLPP,PFKM,RPL13A,RPL3L,COPS7A,COX17,COX3,RPS15,COX7A2L,CPTP,CRTC2,CRYAB,RPS5,CAPN3,CUTC,CYFIP1,RPLP0,TMOD4,DCXR,DDX3X,DECR1,DHRS4,RPL6,EIF3F,NDUFB7,EGF,EIF2D,EIF3E,NDUFB2,EIF3H,EIF4G1,BIN1,EIF3L,EPRS,EPS8,ND…
GO:BP	cellular component biogenesis	GO:0044085	1.5634e-09	8.80593	3253	1126	299	17847	NDUFB10,ABCA1,EIF3K,ACOT13,ACTA1,ACTN2,ACTN3,ADD3,ADRM1,ADSL,SYNPO,NDUFB4,ALDH5A1,AMIGO1,ANXA2,AP2S1,NDUFC2,APOC2,MRPS7,APOPT1,APP,ARHGEF6,ARL2,COA3,ASH2L,NDUFA8,ATG14,ATG2A,NDUFV2,RPS14,RPL27,ATPAF1,BAG6,BCS1L,BECN1,PARVB,BIRC2,NDUFB11,UBA52,CCDC151,CCDC155,MYOZ1,CDC123,CDH24,CENPP,RPS16,CLPP,CLSTN1,PFKM,RPL13A,RPL3L,COPS7A,COX17,COX3,RPS15,COX7A2L,CPTP,CRTC2,CRYAB,CSRP3,RPS5,CAPN3,CUTC,CYFIP1,R…
GO:BP	organonitrogen compound metabolic process	GO:1901564	3.05209e-09	8.5154	6854	1126	545	17847	AATK,ABCA1,EIF3K,ACADM,TPI1,COX5B,ACOT1,ACOT13,ACSL1,ACTN2,ACTN3,ADAMTS1,EIF1,ADRM1,ADSL,AEBP1,NECAB3,AGMAT,AHCYL1,AIFM1,AK1,ALAS1,ALDH5A1,MDH2,ALG11,AMPD1,AMT,ANAPC1,ANAPC13,EIF4A2,ANXA2,AP2S1,APOL3,APOLD1,MRPS7,APOPT1,APP,ARAF,ARHGEF6,RPL21,ARPP19,COA3,ASB14,ASH2L,ASNSD1,ATG14,RPS11,RPS4Y1,PGAM2,RPS14,RPL27,ATP6,ATRAID,AUH,PPP1R3C,B3GNT9,BAG6,BCKDK,BECN1,BIRC2,BLOC1S1,BLVRB,BTBD1,YBX3,UBA52,EEF…
GO:BP	skeletal muscle contraction	GO:0003009	3.991e-09	8.39892	42	1126	19	17847	ACTN3,ATP2A1,EEF2,GSTO1,MB,MYH14,MYH7,RCSD1,CASQ1,ATP2A2,STAC2,STAC3,TCAP,TNNC1,TNNC2,TNNI1,TNNI2,TNNT1,TNNT3
GO:BP	establishment of localization in cell	GO:0051649	4.0049e-09	8.39741	2271	1126	224	17847	ABCA1,ABCD3,COX5B,ACTN2,ACTR1B,AHCYL1,ANXA2,AP2S1,AP3S1,APP,ARF5,RPL21,DHRS7C,ATG14,ATP1A2,ATP2A1,RPS11,RPS4Y1,RPS14,RPL27,ATP6,BANF1,BECN1,BLOC1S1,UBA52,ALKBH5,CCDC155,RPS15A,RPS16,RPL13A,COG8,COPB1,RPS15,RPS3A,CRAT,CRYAB,RPS5,CYC1,CAPN3,CYFIP1,RPS29,RPLP0,DCTN3,DECR2,DHRS4,RPL6,RPS24,RPLP1,RPL8,RPL9,ECI2,GSG1L,EIF2D,EIF5A,BIN1,FABP3,FAM160A2,RPS27,FAU,RPS20,FHOD1,FIS1,FKBP1A,RPL27A,GABARAP,RPL3…
GO:BP	sarcomere organization	GO:0045214	4.23564e-09	8.37308	47	1126	20	17847	ACTN2,MYOZ1,CSRP3,CAPN3,FHOD3,LMOD2,MEF2C,MIR1-2,MYH6,MYPN,KLHL41,PRKAR1A,MYOM1,TPM1,CASQ1,SYNPO2L,TCAP,TNNT1,TNNT3,TTN
GO:BP	oxoacid metabolic process	GO:0043436	1.21197e-08	7.91651	1166	1126	134	17847	ABCD3,ACAD11,ACADM,TPI1,ACADVL,ACOT1,ACSL1,ACTN3,ADIPOR1,AGMAT,ALDH5A1,MDH2,AMT,APOC2,APP,ASNSD1,PGAM2,AUH,HAGHL,BCKDK,CARNS1,CKM,PFKM,ADSSL1,VDAC1,MGST3,CRAT,CS,DCXR,DDIT4,DECR1,DECR2,PGM1,DLAT,DLST,ECHDC2,ECHDC3,ECHS1,ECI2,EGF,IDH2,EPRS,ETFB,ETFDH,FAAH2,FABP3,FH,FMOD,GAPDH,GATM,GCSH,GGT7,GLUL,GNPAT,GOT1,GPD1,GPT2,GPX4,GSTO1,GSTP1,HADH,HAGH,HIBADH,HK2,HSD17B10,HSD17B12,HYI,JMJD8,ENO3,LDHB,MDH1,A…
GO:BP	ribosome assembly	GO:0042255	2.58075e-08	7.58825	62	1126	22	17847	MRPS7,RPS14,RPL3L,RPS15,RPS5,RPLP0,DDX3X,RPL6,RPS27,RPL38,RPL10,MRPL11,RPS28,RPL11,RPL12,RPL23A,RPL3,RPL5,RPL24,RPS19,RPSA,RPS10
GO:BP	aerobic electron transport chain	GO:0019646	3.15971e-08	7.50035	20	1126	13	17847	COX5B,NDUFA4,COX6A2,COX7C,COX4I1,COX3,COX6C,COX7A2L,CYCS,COX6B1,COX7B,COX8A,COX5A
GO:BP	mitochondrial electron transport, cytochrome c to oxygen	GO:0006123	3.15971e-08	7.50035	20	1126	13	17847	COX5B,NDUFA4,COX6A2,COX7C,COX4I1,COX3,COX6C,COX7A2L,CYCS,COX6B1,COX7B,COX8A,COX5A
GO:BP	ribosomal large subunit biogenesis	GO:0042273	3.87478e-08	7.41175	69	1126	23	17847	RPL3L,RPLP0,RPL6,RPL7,GTF3A,GTPBP4,RPL38,RPL10,RPL35,MRPL11,RPL10A,RPL11,RPL12,RPL14,RPL23A,RPL3,RPL35A,RPL5,RPL7A,NHP2,RPL24,ZNF622,ZNHIT3
GO:BP	organic acid metabolic process	GO:0006082	4.06635e-08	7.3908	1186	1126	134	17847	ABCD3,ACAD11,ACADM,TPI1,ACADVL,ACOT1,ACSL1,ACTN3,ADIPOR1,AGMAT,ALDH5A1,MDH2,AMT,APOC2,APP,ASNSD1,PGAM2,AUH,HAGHL,BCKDK,CARNS1,CKM,PFKM,ADSSL1,VDAC1,MGST3,CRAT,CS,DCXR,DDIT4,DECR1,DECR2,PGM1,DLAT,DLST,ECHDC2,ECHDC3,ECHS1,ECI2,EGF,IDH2,EPRS,ETFB,ETFDH,FAAH2,FABP3,FH,FMOD,GAPDH,GATM,GCSH,GGT7,GLUL,GNPAT,GOT1,GPD1,GPT2,GPX4,GSTO1,GSTP1,HADH,HAGH,HIBADH,HK2,HSD17B10,HSD17B12,HYI,JMJD8,ENO3,LDHB,MDH1,A…
GO:BP	glucose metabolic process	GO:0006006	5.88245e-08	7.23044	211	1126	42	17847	ACADM,TPI1,ACTN3,ADIPOR1,ALDH5A1,MDH2,ARPP19,PGAM2,CLK2,PFKM,CRTC2,DCXR,PGM1,DLAT,DYRK2,GAPDH,GOT1,GPD1,HK2,IGFBP3,ENO3,SLC25A11,MDH1,MLYCD,ATF4,GPI,NISCH,NR1D1,PDHA1,PDHB,PDK2,PDK4,PGK1,PKM,PPARGC1A,PPP1CB,RORC,SLC25A12,SLC45A3,SORBS1,FBP2,ZMPSTE24
GO:BP	ribosome biogenesis	GO:0042254	9.50428e-08	7.02208	294	1126	51	17847	MRPS7,RPS14,RPL27,RPS16,RPL3L,RPS15,RPS5,RPLP0,DDX3X,RPL6,RPS24,RPS27,FBL,FBLL1,GLUL,RPL7,GTF3A,GTPBP4,IMP4,RPS9,RPL38,RPL10,RPL35,MRPL11,RPL10A,NSA2,RPS28,PIH1D1,RPL11,RPL12,RPS6,RPL14,RPL23A,RPL3,RPL35A,RPL5,RPL7A,NHP2,RPL24,RPS17,RPS19,RPS2,RPS21,RPS7,RPS8,RPSA,RPUSD1,RPS10,YBEY,ZNF622,ZNHIT3
GO:BP	cellular protein localization	GO:0034613	1.26094e-07	6.8993	1945	1126	193	17847	ACTN2,AHCYL1,ANXA2,AP2S1,AP3S1,ARF5,ARL2,RPL21,RPS11,RPS4Y1,RPS14,RPL27,BAG6,BECN1,UBA52,YBX1,CARM1,ALKBH5,RPS15A,RPS16,CLSTN1,RPL13A,COPB1,RPS15,RPS3A,CPE,CRAT,CSRP3,RPS5,CAPN3,RPS29,RPLP0,DDX3X,DECR2,DHRS4,RPL6,RPS24,DNAJA3,RPLP1,RPL8,RPL9,ECI2,GSG1L,EFR3A,EGF,EIF2D,EIF5A,EXOC1,RPS27,FAU,FBLN5,RPS20,FIS1,RPL27A,GABARAP,RPL30,GDI1,GLUL,GNPAT,GOLGA4,GPD1L,RPL7,GSTK1,RPL4,HK2,SAMM50,HSPA8,HUWE1,IF…
GO:BP	cellular component assembly	GO:0022607	1.43277e-07	6.84382	3017	1126	273	17847	NDUFB10,ABCA1,EIF3K,ACOT13,ACTA1,ACTN2,ACTN3,ADD3,ADRM1,ADSL,SYNPO,NDUFB4,ALDH5A1,AMIGO1,ANXA2,AP2S1,NDUFC2,APOC2,MRPS7,APOPT1,APP,ARHGEF6,ARL2,COA3,ASH2L,NDUFA8,ATG14,ATG2A,NDUFV2,RPS14,ATPAF1,BAG6,BCS1L,BECN1,PARVB,BIRC2,NDUFB11,UBA52,CCDC151,CCDC155,MYOZ1,CDC123,CDH24,CENPP,CLPP,CLSTN1,PFKM,RPL13A,RPL3L,COPS7A,COX17,COX3,RPS15,COX7A2L,CPTP,CRTC2,CRYAB,CSRP3,RPS5,CAPN3,CUTC,CYFIP1,RPLP0,TMOD4,D…
GO:BP	cellular macromolecule localization	GO:0070727	2.05672e-07	6.68682	1956	1126	193	17847	ACTN2,AHCYL1,ANXA2,AP2S1,AP3S1,ARF5,ARL2,RPL21,RPS11,RPS4Y1,RPS14,RPL27,BAG6,BECN1,UBA52,YBX1,CARM1,ALKBH5,RPS15A,RPS16,CLSTN1,RPL13A,COPB1,RPS15,RPS3A,CPE,CRAT,CSRP3,RPS5,CAPN3,RPS29,RPLP0,DDX3X,DECR2,DHRS4,RPL6,RPS24,DNAJA3,RPLP1,RPL8,RPL9,ECI2,GSG1L,EFR3A,EGF,EIF2D,EIF5A,EXOC1,RPS27,FAU,FBLN5,RPS20,FIS1,RPL27A,GABARAP,RPL30,GDI1,GLUL,GNPAT,GOLGA4,GPD1L,RPL7,GSTK1,RPL4,HK2,SAMM50,HSPA8,HUWE1,IF…
GO:BP	phosphate-containing compound metabolic process	GO:0006796	4.00635e-07	6.39725	3351	1126	295	17847	NDUFB10,AATK,TPI1,COX5B,NDUFA4,ACOT1,ACOT13,ACSL1,ACTN2,ACTN3,ACYP2,ADSL,AK1,AK8,COX6A2,NDUFB4,ALDH5A1,COX7C,AMPD1,ANXA2,NDUFC2,APOC2,APP,ARAF,ARHGEF6,ARPP19,NDUFA8,ATG14,NDUFV2,UQCRC1,PGAM2,COX4I1,ATP6,PPP1R3C,BCKDK,NDUFB11,UBA52,MAPK12,CA3,CAMK2B,CAPN2,MYOZ1,CCNB3,CEP85,CHKB,CKM,CLK1,CLK2,PFKM,CNKSR1,CNTD2,ADSSL1,COX3,COX6C,MAPKAP1,COX7A2L,CRYAB,CYC1,NMNAT3,CYCS,DBI,DCXR,DDIT4,DDX3X,DEPTOR,COX6…
GO:BP	cardiac muscle contraction	GO:0060048	5.21195e-07	6.283	142	1126	32	17847	ATP1A2,ATP2A1,CSRP3,CTNNA3,BIN1,GPD1L,GSTO1,SCN1B,HRC,SNTA1,MIR1-2,MYH6,MYH7,MYL1,MYL2,MYL3,MYLK2,NOS1,PDE4B,PLN,TPM1,SMTN,ATP2A2,TCAP,TMEM38A,TNNC1,TNNI1,TNNI2,TNNT1,TNNT3,TTN,NPPA
GO:BP	phosphorus metabolic process	GO:0006793	5.99651e-07	6.2221	3377	1126	296	17847	NDUFB10,AATK,TPI1,COX5B,NDUFA4,ACOT1,ACOT13,ACSL1,ACTN2,ACTN3,ACYP2,ADSL,AK1,AK8,COX6A2,NDUFB4,ALDH5A1,COX7C,AMPD1,ANXA2,NDUFC2,APOC2,APP,ARAF,ARHGEF6,ARPP19,NDUFA8,ATG14,NDUFV2,UQCRC1,PGAM2,COX4I1,ATP6,PPP1R3C,BCKDK,NDUFB11,UBA52,MAPK12,CA3,CAMK2B,CAPN2,MYOZ1,CCNB3,CEP85,CHKB,CKM,CLK1,CLK2,PFKM,CNKSR1,CNTD2,ADSSL1,COX3,COX6C,MAPKAP1,COX7A2L,CRYAB,CYC1,NMNAT3,CYCS,DBI,DCXR,DDIT4,DDX3X,DEPTOR,COX6…
GO:BP	ribonucleoprotein complex biogenesis	GO:0022613	7.43204e-07	6.12889	460	1126	66	17847	EIF3K,MRPS7,RPS14,RPL27,RPS16,RPL13A,RPL3L,RPS15,RPS5,RPLP0,DDX3X,RPL6,RPS24,EIF3F,EIF2D,EIF3E,EIF3H,EIF3L,RPS27,FBL,FBLL1,TXNL4A,GLUL,RPL7,GTF3A,GTPBP4,IMP4,RPS9,RPL38,RPL10,RPL35,MRPL11,RPL10A,EIF3G,NSA2,RPS28,PIH1D1,RPL11,RPL12,RPS6,RPL14,RPL23A,RPS23,RPL3,RPL35A,RPL5,RPL7A,NHP2,RPL24,RPS17,RPS19,RPS2,RPS21,RPS7,RPS8,RPSA,RPUSD1,SF1,SNRPD2,SRPK3,RPS10,EIF3I,LSM3,YBEY,ZNF622,ZNHIT3
GO:BP	NADH metabolic process	GO:0006734	1.25447e-06	5.90154	44	1126	17	17847	TPI1,ACTN3,MDH2,PGAM2,PFKM,GAPDH,GPD1,GPD1L,HK2,ENO3,MDH1,GPI,NUDT17,OGDH,PGK1,PKM,SLC25A12
GO:BP	NAD metabolic process	GO:0019674	1.51072e-06	5.82082	50	1126	18	17847	TPI1,ACTN3,PGAM2,PFKM,NMNAT3,GAPDH,GPD1,GPD1L,HK2,ENO3,MDH1,GPI,NMRK1,NMRK2,PGK1,PKM,LDHA,SLC25A12
GO:BP	cellular localization	GO:0051641	1.53445e-06	5.81405	2974	1126	265	17847	ABCA1,ABCD3,COX5B,ACTN2,ACTR1B,AHCYL1,ANXA2,AP2S1,AP3S1,APP,ARF5,ARL2,RPL21,DHRS7C,ATG14,ATP1A2,ATP2A1,RPS11,RPS4Y1,RPS14,RPL27,ATP6,BAG6,BANF1,BECN1,BLOC1S1,UBA52,YBX1,CARM1,ALKBH5,CCDC155,RPS15A,RPS16,CLSTN1,CLUH,RPL13A,COG8,COPB1,RPS15,RPS3A,CPE,CRAT,CRYAB,CSRP3,RPS5,CYC1,CAPN3,CYFIP1,RPS29,RPLP0,DCTN3,DDX3X,DECR2,DHRS4,RPL6,RPS24,DNAJA3,RPLP1,RPL8,RPL9,ECI2,GSG1L,EFR3A,EGF,EIF2D,EIF5A,BIN1,EX…
GO:BP	musculoskeletal movement	GO:0050881	1.62436e-06	5.78932	56	1126	19	17847	ACTN3,ATP2A1,EEF2,GSTO1,MB,MYH14,MYH7,RCSD1,CASQ1,ATP2A2,STAC2,STAC3,TCAP,TNNC1,TNNC2,TNNI1,TNNI2,TNNT1,TNNT3
GO:BP	multicellular organismal movement	GO:0050879	1.62436e-06	5.78932	56	1126	19	17847	ACTN3,ATP2A1,EEF2,GSTO1,MB,MYH14,MYH7,RCSD1,CASQ1,ATP2A2,STAC2,STAC3,TCAP,TNNC1,TNNC2,TNNI1,TNNI2,TNNT1,TNNT3
GO:BP	mitochondrial electron transport, ubiquinol to cytochrome c	GO:0006122	2.00638e-06	5.69759	14	1126	10	17847	UQCRC1,CYC1,CYCS,UQCRH,UQCRFS1,UQCR11,UQCR10,UQCRQ,UQCRB,UQCRC2
GO:BP	hexose metabolic process	GO:0019318	2.21182e-06	5.65525	254	1126	44	17847	ACADM,TPI1,ACTN3,ADIPOR1,ALDH5A1,MDH2,ARPP19,PGAM2,CLK2,PFKM,CRTC2,DCXR,PGM1,DLAT,DYRK2,FUOM,GAPDH,GOT1,GPD1,HK2,IGFBP3,ENO3,SLC25A11,MDH1,MLYCD,ATF4,GPI,NISCH,NR1D1,PDHA1,PDHB,PDK2,PDK4,PGK1,PKM,PPARGC1A,PPP1CB,RORC,SLC25A12,SLC45A3,SORBS1,FBP2,AKR1B1,ZMPSTE24
GO:BP	cellular component assembly involved in morphogenesis	GO:0010927	2.22515e-06	5.65264	111	1126	27	17847	ACTA1,ACTN2,MYOZ1,CSRP3,CAPN3,TMOD4,FHOD3,GNPAT,LMOD1,LMOD2,MEF2C,MIR1-2,MYH6,MYL2,MYPN,KLHL41,PMP22,PRKAR1A,MYOM1,TPM1,CASQ1,SYNPO2L,TCAP,TNNT1,TNNT3,NEB,TTN
GO:BP	muscle cell development	GO:0055001	3.52635e-06	5.45267	186	1126	36	17847	ACTA1,ACTN2,ACTN3,MYOZ1,CSRP3,CAPN3,TMOD4,BIN1,FHOD3,LMOD1,LMOD2,PI16,MEF2C,MIR1-2,MYH6,MYL2,MYPN,NACA,KLHL41,PRKAR1A,MYOM1,TPM1,CASQ1,ATP2A2,RYR1,STAC3,SYNPO2L,SYPL2,TCAP,TNNT1,TNNT3,NEB,TTN,NPPA,VEGFA,ZMPSTE24
GO:BP	cellular protein metabolic process	GO:0044267	4.49543e-06	5.34723	5324	1126	426	17847	AATK,ABCA1,EIF3K,ACSL1,ACTN2,EIF1,ADRM1,AIFM1,MDH2,ALG11,ANAPC1,ANAPC13,EIF4A2,ANXA2,AP2S1,MRPS7,APOPT1,APP,ARAF,ARHGEF6,RPL21,ARPP19,COA3,ASB14,ASH2L,ATG14,RPS11,RPS4Y1,RPS14,RPL27,ATRAID,PPP1R3C,B3GNT9,BAG6,BCKDK,BECN1,BIRC2,BLOC1S1,BTBD1,YBX3,UBA52,EEF1D,MAPK12,CAMK2B,CAPN2,CARM1,MYOZ1,CCNB3,CDC123,RPS15A,CEP85,CHRDL1,CIDEB,RPS16,CLK1,CLK2,CLPP,RPL13A,CNTD2,RPL3L,EEF2,COPS7A,RPS15,MAPKAP1,RPS3…
GO:BP	purine ribonucleotide metabolic process	GO:0009150	6.10717e-06	5.21416	400	1126	58	17847	TPI1,COX5B,ACOT1,ACOT13,ACSL1,ACTN3,ADSL,AK1,AMPD1,APP,PGAM2,ATP6,PFKM,ADSSL1,CYC1,DBI,DDIT4,PGM1,DLAT,DLST,GAPDH,GMPR,GPD1,HK2,HSD17B12,IMPDH2,JMJD8,ENO3,MLYCD,MPC1,GPI,NME1-NME2,NME7,NUDT3,NUPR1,OGDH,PDE4B,PDHA1,PDHB,PDK2,PDK4,HSD17B8,ATP5J,PGK1,PINK1,PKM,PPARGC1A,RHOQ,LDHA,ACAT1,TECR,ATP5G1,SCD5,SLC25A12,SUCLA2,SUCLG1,SUCLG2,NPPA
GO:BP	fatty acid oxidation	GO:0019395	6.32852e-06	5.1987	101	1126	25	17847	ABCD3,ACAD11,ACADM,ACADVL,ADIPOR1,AUH,CRAT,DECR1,DECR2,ECHDC2,ECHS1,ECI2,ETFB,ETFDH,FABP3,HADH,ACADS,MLYCD,NR4A3,PDK4,PEX2,PHYH,PPARGC1A,ACAT1,ECH1
GO:BP	translational elongation	GO:0006414	6.86984e-06	5.16305	140	1126	30	17847	MRPS7,EEF1D,EEF2,EEF1G,RPLP1,EEF1A1,EEF1A2,EEF2K,EIF5A,MRPL33,AURKAIP1,MRPL11,MRPL16,MRPL2,MRPL23,MRPL34,MRPL35,MRPL40,MRPL41,MRPL46,MRPL52,MRPL55,MRPS18B,MRPS33,EEF1B2,OXA1L,RPLP2,MRPL4,TUFM,ELOF1
GO:BP	purine nucleotide metabolic process	GO:0006163	8.76403e-06	5.0573	435	1126	61	17847	TPI1,COX5B,ACOT1,ACOT13,ACSL1,ACTN3,ADSL,AK1,AMPD1,APP,PGAM2,ATP6,PFKM,ADSSL1,CYC1,DBI,DDIT4,PGM1,DLAT,DLST,GAPDH,GDA,GMPR,GPD1,HK2,HSD17B12,IMPDH2,JMJD8,ENO3,MLYCD,MPC1,GPI,NME1-NME2,NME7,NOS1,NT5C1A,NUDT3,NUPR1,OGDH,PDE4B,PDHA1,PDHB,PDK2,PDK4,HSD17B8,ATP5J,PGK1,PINK1,PKM,PPARGC1A,RHOQ,LDHA,ACAT1,TECR,ATP5G1,SCD5,SLC25A12,SUCLA2,SUCLG1,SUCLG2,NPPA
GO:BP	lipid oxidation	GO:0034440	9.79962e-06	5.00879	103	1126	25	17847	ABCD3,ACAD11,ACADM,ACADVL,ADIPOR1,AUH,CRAT,DECR1,DECR2,ECHDC2,ECHS1,ECI2,ETFB,ETFDH,FABP3,HADH,ACADS,MLYCD,NR4A3,PDK4,PEX2,PHYH,PPARGC1A,ACAT1,ECH1
GO:BP	muscle structure development	GO:0061061	9.93716e-06	5.00274	677	1126	83	17847	ACADM,ACTA1,ACTN2,ACTN3,ARID5B,BTBD1,YBX3,BTG1,MAPK12,CAPN2,MYOZ1,CD164,CHKB,EEF2,CRYAB,CSRP3,CAPN3,TMOD4,DLL4,BIN1,FHL1,ASB2,FHOD3,FKBP1A,ID3,FHL3,IGFBP3,ITGB1BP2,JPH1,FER1L5,SVIL,LMOD1,LMOD2,PI16,MAFF,MEF2C,MESP1,MIR1-2,MYH14,MYH6,MYH7,MYL2,MYL3,MYLK2,MYLPF,MYPN,NACA,PRICKLE4,NMRK2,NOS1,NUPR1,PDLIM1,PDLIM3,PDLIM7,KLHL41,PRKAR1A,RBFOX1,RBM38,MYOM1,TPM1,CASQ1,SMTN,ATP2A2,RYR1,SRPK3,STAC3,SYNPO2L,…
GO:BP	actin filament-based process	GO:0030029	1.15874e-05	4.93601	771	1126	91	17847	ACTA1,ACTN2,ACTN3,ADD3,SYNPO,ATP1A2,ATP2A1,PARVB,CCDC155,MYOZ1,MAPKAP1,CSRP3,CAPN3,CTNNA3,CYFIP1,DAAM2,TMOD4,DES,BIN1,EPS8,TPM2,FHDC1,FHOD1,FHOD3,FLII,GPD1L,SCN1B,FHL3,FRMD3,SNTA1,KLHL17,LMOD1,LMOD2,CAP2,LURAP1,MEF2C,MIR1-2,MSRB2,MYBPC2,MYH14,MYH4,MYH6,MYH7,MYL1,MYL2,MYL3,MYLK2,MYOC,MYPN,NCK2,PRICKLE4,NISCH,PACSIN2,PDE4B,PDLIM1,PDLIM3,PDLIM7,KLHL41,PIK3R1,PLN,PLS3,PRKAR1A,RHOB,RHOQ,MYOM1,TPM1,CAS…
GO:BP	ribonucleoprotein complex subunit organization	GO:0071826	1.55333e-05	4.80874	251	1126	42	17847	EIF3K,MRPS7,RPS14,RPL13A,RPL3L,RPS15,RPS5,RPLP0,DDX3X,RPL6,EIF3F,EIF2D,EIF3E,EIF3H,EIF3L,RPS27,TXNL4A,RPL38,RPL10,MRPL11,MRRF,MTIF2,MTIF3,EIF3G,RPS28,PIH1D1,RPL11,RPL12,RPL23A,RPS23,RPL3,RPL5,RPL24,RPS19,RPSA,SF1,SNRPD2,SRPK3,RPS10,EIF3I,LSM3,ZNHIT3
GO:BP	organic substance transport	GO:0071702	1.66383e-05	4.77889	2893	1126	254	17847	ABCA1,ABCA8,ABCD3,ACSL1,NECAB3,AHCYL1,ANXA2,AP2S1,AP3S1,APOC2,APOL3,APOLD1,ARF5,ARL2,RPL21,ARPP19,ATP1A2,RPS11,RPS4Y1,RPS14,RPL27,ATP6V1G1,AZGP1,BTF3,UBA52,CA14,CA2,CA3,ALKBH5,RPS15A,RPS16,CLSTN1,PFKM,RPL13A,COG8,COPB1,RPS15,RPS3A,CPE,CPTP,CRAT,RPS5,CYB5R1,RPS29,RPLP0,DECR2,DHRS4,RPL6,APOO,RPS24,RPLP1,SLC25A4,RPL8,RPL9,ECI2,GSG1L,EGF,EIF2D,IDH2,EIF5A,EPRS,EXOC1,FABP3,FAM160A2,HDLBP,RPS27,FAM3D,FA…
GO:BP	ribonucleotide metabolic process	GO:0009259	2.42512e-05	4.61527	415	1126	58	17847	TPI1,COX5B,ACOT1,ACOT13,ACSL1,ACTN3,ADSL,AK1,AMPD1,APP,PGAM2,ATP6,PFKM,ADSSL1,CYC1,DBI,DDIT4,PGM1,DLAT,DLST,GAPDH,GMPR,GPD1,HK2,HSD17B12,IMPDH2,JMJD8,ENO3,MLYCD,MPC1,GPI,NME1-NME2,NME7,NUDT3,NUPR1,OGDH,PDE4B,PDHA1,PDHB,PDK2,PDK4,HSD17B8,ATP5J,PGK1,PINK1,PKM,PPARGC1A,RHOQ,LDHA,ACAT1,TECR,ATP5G1,SCD5,SLC25A12,SUCLA2,SUCLG1,SUCLG2,NPPA
GO:BP	striated muscle cell development	GO:0055002	2.48927e-05	4.60393	173	1126	33	17847	ACTA1,ACTN2,ACTN3,MYOZ1,CSRP3,CAPN3,TMOD4,FHOD3,LMOD1,LMOD2,PI16,MEF2C,MIR1-2,MYH6,MYL2,MYPN,NACA,KLHL41,PRKAR1A,MYOM1,TPM1,CASQ1,RYR1,STAC3,SYNPO2L,TCAP,TNNT1,TNNT3,NEB,TTN,NPPA,VEGFA,ZMPSTE24
GO:BP	hexose biosynthetic process	GO:0019319	2.79195e-05	4.55409	93	1126	23	17847	ACADM,TPI1,MDH2,ARPP19,PGAM2,CLK2,CRTC2,PGM1,GAPDH,GOT1,GPD1,ENO3,SLC25A11,MDH1,ATF4,GPI,NR1D1,PDK2,PGK1,PPARGC1A,SLC25A12,FBP2,AKR1B1
GO:BP	heart contraction	GO:0060047	3.19087e-05	4.49609	286	1126	45	17847	AHCYL1,ATP1A2,ATP2A1,CACNA1S,CACNG6,CSRP3,CTNNA3,DES,BIN1,GPD1L,GSTO1,SCN1B,HRC,HSPB7,SNTA1,KCNJ12,MIR1-2,MYH6,MYH7,MYL1,MYL2,MYL3,MYLK2,FXYD1,NOS1,PDE4B,ATP5J,PLN,TPM1,CASQ1,SMTN,ATP2A2,RYR1,S100A1,SOD1,TCAP,TMEM38A,TNNC1,TNNI1,TNNI2,TNNT1,TNNT3,TTN,NPPA,ZMPSTE24
GO:BP	organelle organization	GO:0006996	3.31351e-05	4.47971	3920	1126	325	17847	NDUFB10,ABCA1,ABCD3,ACTA1,ACTN2,ACTR1B,ADD3,SYNPO,AIFM1,NDUFB4,ALAS1,ANAPC1,ANXA2,NDUFC2,MRPS7,APOPT1,ARL2,COA3,ASH2L,ATAD3B,NDUFA8,ATG14,ATG2A,ATP2A1,NDUFV2,RPS14,ATP6,ATP6V1G1,ATPAF1,BAG6,BANF1,BCS1L,BECN1,PARVB,BLOC1S1,BRD3,NDUFB11,ESRRA,UBA52,C16ORF45,CALCOCO2,CAPN2,CARM1,CCDC151,CCDC155,MYOZ1,CENPP,CEP85,CHCHD3,CHCHD6,CIDEB,CLUH,RPL3L,COPS7A,COX17,VDAC1,RPS15,MAPKAP1,COX7A2L,CRAT,CRTC2,CRYAB…
GO:BP	cofactor metabolic process	GO:0051186	3.58838e-05	4.4451	462	1126	62	17847	ACOT1,ACOT13,ACSL1,AHCYL1,ALAS1,ALDH5A1,BLVRB,COQ10A,NMNAT3,DBI,DLAT,DLST,IDH2,PRDX2,GGT7,GOT1,GPT2,GPX4,GSTK1,GSTO1,GSTP1,HAGH,HBD,HBG1,COQ9,HSD17B12,ISCA1,ISCU,AKR7A2,MAOB,MLYCD,MPC1,MTHFS,NFU1,NMRK1,NMRK2,NNT,NOXA1,NUDT17,OGDH,PCCB,PDHA1,PDHB,PDK2,PDK4,HSD17B8,PHYH,PINK1,PRDX1,PRDX6,PTS,QDPR,HBB,ACAT1,TECR,NDUFA9,SCD5,SOD1,SUCLA2,SUCLG1,SUCLG2,AKR1B1
GO:BP	phosphorylation	GO:0016310	3.60223e-05	4.44343	2462	1126	221	17847	NDUFB10,AATK,TPI1,COX5B,NDUFA4,ACSL1,ACTN2,ACTN3,AK1,AK8,COX6A2,NDUFB4,COX7C,ANXA2,NDUFC2,APP,ARAF,ARHGEF6,NDUFA8,ATG14,NDUFV2,UQCRC1,PGAM2,COX4I1,ATP6,BCKDK,NDUFB11,UBA52,MAPK12,CAMK2B,CCNB3,CEP85,CHKB,CKM,CLK1,CLK2,PFKM,CNKSR1,CNTD2,COX3,COX6C,MAPKAP1,COX7A2L,CRYAB,CYC1,CYCS,DDIT4,DDX3X,DEPTOR,COX6B1,PGM1,RPLP1,DUSP10,DYRK2,UQCRH,EEF1A1,EEF1A2,NDUFB7,EEF2K,EFR3A,EGF,UQCRFS1,NDUFB2,EIF4G1,NDUFB9…
GO:BP	peptide transport	GO:0015833	3.65296e-05	4.43736	2124	1126	196	17847	ABCA1,NECAB3,AHCYL1,AP2S1,AP3S1,APOC2,ARF5,ARL2,RPL21,RPS11,RPS4Y1,RPS14,RPL27,ATP6V1G1,AZGP1,BTF3,UBA52,CA2,ALKBH5,RPS15A,RPS16,CLSTN1,PFKM,RPL13A,COG8,COPB1,RPS15,RPS3A,CPE,CPTP,CRAT,RPS5,RPS29,RPLP0,DECR2,DHRS4,RPL6,RPS24,RPLP1,SLC25A4,RPL8,RPL9,ECI2,GSG1L,EIF2D,IDH2,EIF5A,EXOC1,FAM160A2,RPS27,FAM3D,FAU,RPS20,FIS1,RPL27A,GABARAP,GAPDH,RPL30,GDI1,GLUL,GNAS,GNPAT,GOLGA2,GOLGA4,RPL7,GSTK1,HADH,RP…
GO:BP	protein transport	GO:0015031	3.68015e-05	4.43413	2084	1126	193	17847	ABCA1,NECAB3,AHCYL1,AP2S1,AP3S1,APOC2,ARF5,ARL2,RPL21,RPS11,RPS4Y1,RPS14,RPL27,ATP6V1G1,AZGP1,BTF3,UBA52,ALKBH5,RPS15A,RPS16,CLSTN1,PFKM,RPL13A,COG8,COPB1,RPS15,RPS3A,CPTP,CRAT,RPS5,RPS29,RPLP0,DECR2,DHRS4,RPL6,RPS24,RPLP1,SLC25A4,RPL8,RPL9,ECI2,GSG1L,EIF2D,IDH2,EIF5A,EXOC1,FAM160A2,RPS27,FAM3D,FAU,RPS20,FIS1,RPL27A,GABARAP,GAPDH,RPL30,GDI1,GLUL,GNAS,GNPAT,GOLGA2,GOLGA4,RPL7,GSTK1,HADH,RPL4,HOOK2…
GO:BP	small molecule catabolic process	GO:0044282	4.76525e-05	4.32191	444	1126	60	17847	ABCD3,ACAD11,ACADM,TPI1,ACADVL,ACTN3,ALDH5A1,AMT,PGAM2,AUH,HAGHL,BCKDK,CARNS1,PFKM,CRAT,DCXR,DECR1,DECR2,PGM1,DLST,ECHDC2,ECHS1,ECI2,ETFB,ETFDH,GAPDH,GCSH,GLUL,GOT1,GPT2,HADH,HAGH,HIBADH,HK2,HSD17B10,ENO3,ACADS,MLYCD,MPST,MTHFS,TXN2,GPI,NOS1,NT5C1A,NUDT3,OGDH,OXCT1,PCCB,PEX2,PGK1,PHYH,PKM,QDPR,ACAT1,ECH1,APOBEC2,LDHD,IMPA2,SLC25A12,SLC27A4
GO:BP	actomyosin structure organization	GO:0031032	5.27552e-05	4.27774	196	1126	35	17847	ACTA1,ACTN2,MYOZ1,CSRP3,CAPN3,TMOD4,FHDC1,FHOD1,FHOD3,FRMD3,LMOD1,LMOD2,LURAP1,MEF2C,MIR1-2,MYH14,MYH6,MYL2,MYOC,MYPN,KLHL41,PIK3R1,PRKAR1A,MYOM1,TPM1,CASQ1,SORBS1,SYNPO2L,TCAP,TESK1,TNNT1,TNNT3,NEB,TTN,VPS4A
GO:BP	ribose phosphate metabolic process	GO:0019693	5.78856e-05	4.23743	425	1126	58	17847	TPI1,COX5B,ACOT1,ACOT13,ACSL1,ACTN3,ADSL,AK1,AMPD1,APP,PGAM2,ATP6,PFKM,ADSSL1,CYC1,DBI,DDIT4,PGM1,DLAT,DLST,GAPDH,GMPR,GPD1,HK2,HSD17B12,IMPDH2,JMJD8,ENO3,MLYCD,MPC1,GPI,NME1-NME2,NME7,NUDT3,NUPR1,OGDH,PDE4B,PDHA1,PDHB,PDK2,PDK4,HSD17B8,ATP5J,PGK1,PINK1,PKM,PPARGC1A,RHOQ,LDHA,ACAT1,TECR,ATP5G1,SCD5,SLC25A12,SUCLA2,SUCLG1,SUCLG2,NPPA
GO:BP	purine-containing compound metabolic process	GO:0072521	5.85218e-05	4.23268	468	1126	62	17847	TPI1,COX5B,ACOT1,ACOT13,ACSL1,ACTN3,ADSL,AK1,AMPD1,APP,PGAM2,ATP6,PFKM,ADSSL1,CYC1,DBI,DDIT4,PGM1,DLAT,DLST,GAPDH,GDA,GMPR,GPD1,MACROD1,HK2,HSD17B12,IMPDH2,JMJD8,ENO3,MLYCD,MPC1,GPI,NME1-NME2,NME7,NOS1,NT5C1A,NUDT3,NUPR1,OGDH,PDE4B,PDHA1,PDHB,PDK2,PDK4,HSD17B8,ATP5J,PGK1,PINK1,PKM,PPARGC1A,RHOQ,LDHA,ACAT1,TECR,ATP5G1,SCD5,SLC25A12,SUCLA2,SUCLG1,SUCLG2,NPPA
GO:BP	macromolecule localization	GO:0033036	6.00542e-05	4.22146	3228	1126	275	17847	ABCA1,ABCA8,ABCD3,ACSL1,ACTN2,NECAB3,AHCYL1,ANXA2,AP2S1,AP3S1,APOC2,APOL3,APOLD1,ARF5,ARL2,RPL21,RPS11,RPS4Y1,RPS14,RPL27,ATP6V1G1,AZGP1,BAG6,BECN1,BTF3,UBA52,YBX1,CARM1,ALKBH5,RPS15A,RPS16,CLSTN1,PFKM,RPL13A,COG8,COPB1,RPS15,RPS3A,CPE,CPTP,CRAT,CSRP3,RPS5,CAPN3,RPS29,RPLP0,DDX3X,DECR2,DHRS4,RPL6,APOO,RPS24,DNAJA3,RPLP1,SLC25A4,RPL8,RPL9,ECI2,GSG1L,EFR3A,EGF,EIF2D,IDH2,EIF5A,EPRS,EXOC1,FABP3,FAM1…
GO:BP	ribosomal small subunit assembly	GO:0000028	6.94342e-05	4.15843	18	1126	10	17847	MRPS7,RPS14,RPS15,RPS5,RPS27,RPL38,RPS28,RPS19,RPSA,RPS10
GO:BP	pyruvate metabolic process	GO:0006090	7.06341e-05	4.15099	154	1126	30	17847	TPI1,ACTN3,APP,PGAM2,PFKM,VDAC1,DDIT4,PGM1,DLAT,GAPDH,GPD1,HAGH,HK2,JMJD8,ENO3,LDHB,MPC1,GPI,NR4A3,NUPR1,OGDH,PDHA1,PDHB,PDK2,PDK4,PGK1,PKM,PPARGC1A,LDHA,SLC16A1
GO:BP	gluconeogenesis	GO:0006094	7.30787e-05	4.13621	90	1126	22	17847	ACADM,TPI1,MDH2,ARPP19,PGAM2,CLK2,CRTC2,PGM1,GAPDH,GOT1,GPD1,ENO3,SLC25A11,MDH1,ATF4,GPI,NR1D1,PDK2,PGK1,PPARGC1A,SLC25A12,FBP2
GO:BP	amide transport	GO:0042886	7.677e-05	4.11481	2158	1126	197	17847	ABCA1,NECAB3,AHCYL1,AP2S1,AP3S1,APOC2,ARF5,ARL2,RPL21,RPS11,RPS4Y1,RPS14,RPL27,ATP6V1G1,AZGP1,BTF3,UBA52,CA2,ALKBH5,RPS15A,RPS16,CLSTN1,PFKM,RPL13A,COG8,COPB1,RPS15,RPS3A,CPE,CPTP,CRAT,RPS5,RPS29,RPLP0,DECR2,DHRS4,RPL6,RPS24,RPLP1,SLC25A4,RPL8,RPL9,ECI2,GSG1L,EIF2D,IDH2,EIF5A,EXOC1,FAM160A2,RPS27,FAM3D,FAU,RPS20,FIS1,RPL27A,GABARAP,GAPDH,RPL30,GDI1,GLUL,GNAS,GNPAT,GOLGA2,GOLGA4,RPL7,GSTK1,HADH,RP…
GO:BP	ribonucleoprotein complex assembly	GO:0022618	8.64735e-05	4.06312	237	1126	39	17847	EIF3K,MRPS7,RPS14,RPL13A,RPL3L,RPS15,RPS5,RPLP0,DDX3X,RPL6,EIF3F,EIF2D,EIF3E,EIF3H,EIF3L,RPS27,TXNL4A,RPL38,RPL10,MRPL11,EIF3G,RPS28,PIH1D1,RPL11,RPL12,RPL23A,RPS23,RPL3,RPL5,RPL24,RPS19,RPSA,SF1,SNRPD2,SRPK3,RPS10,EIF3I,LSM3,ZNHIT3
GO:BP	protein localization	GO:0008104	9.09322e-05	4.04128	2863	1126	248	17847	ABCA1,ACTN2,NECAB3,AHCYL1,ANXA2,AP2S1,AP3S1,APOC2,ARF5,ARL2,RPL21,RPS11,RPS4Y1,RPS14,RPL27,ATP6V1G1,AZGP1,BAG6,BECN1,BTF3,UBA52,YBX1,CARM1,ALKBH5,RPS15A,RPS16,CLSTN1,PFKM,RPL13A,COG8,COPB1,RPS15,RPS3A,CPE,CPTP,CRAT,CSRP3,RPS5,CAPN3,RPS29,RPLP0,DDX3X,DECR2,DHRS4,RPL6,RPS24,DNAJA3,RPLP1,SLC25A4,RPL8,RPL9,ECI2,GSG1L,EFR3A,EGF,EIF2D,IDH2,EIF5A,EXOC1,FAM160A2,RPS27,FAM3D,FAU,FBLN5,RPS20,FIS1,FKBP1A,RP…
GO:BP	heart process	GO:0003015	9.23715e-05	4.03446	296	1126	45	17847	AHCYL1,ATP1A2,ATP2A1,CACNA1S,CACNG6,CSRP3,CTNNA3,DES,BIN1,GPD1L,GSTO1,SCN1B,HRC,HSPB7,SNTA1,KCNJ12,MIR1-2,MYH6,MYH7,MYL1,MYL2,MYL3,MYLK2,FXYD1,NOS1,PDE4B,ATP5J,PLN,TPM1,CASQ1,SMTN,ATP2A2,RYR1,S100A1,SOD1,TCAP,TMEM38A,TNNC1,TNNI1,TNNI2,TNNT1,TNNT3,TTN,NPPA,ZMPSTE24
GO:BP	monosaccharide biosynthetic process	GO:0046364	9.93741e-05	4.00273	99	1126	23	17847	ACADM,TPI1,MDH2,ARPP19,PGAM2,CLK2,CRTC2,PGM1,GAPDH,GOT1,GPD1,ENO3,SLC25A11,MDH1,ATF4,GPI,NR1D1,PDK2,PGK1,PPARGC1A,SLC25A12,FBP2,AKR1B1
GO:BP	monosaccharide metabolic process	GO:0005996	0.000102383	3.98977	297	1126	45	17847	ACADM,TPI1,ACTN3,ADIPOR1,ALDH5A1,MDH2,ARPP19,PGAM2,CLK2,PFKM,CRTC2,DCXR,PGM1,DLAT,DYRK2,FUOM,GAPDH,GOT1,GPD1,GSTO1,HK2,IGFBP3,ENO3,SLC25A11,MDH1,MLYCD,ATF4,GPI,NISCH,NR1D1,PDHA1,PDHB,PDK2,PDK4,PGK1,PKM,PPARGC1A,PPP1CB,RORC,SLC25A12,SLC45A3,SORBS1,FBP2,AKR1B1,ZMPSTE24
GO:BP	nitrogen compound transport	GO:0071705	0.000103526	3.98495	2466	1126	219	17847	ABCA1,NECAB3,AHCYL1,AP2S1,AP3S1,APOC2,ARF5,ARL2,RPL21,ATP1A2,RPS11,RPS4Y1,RPS14,RPL27,ATP6V1G1,AZGP1,BTF3,UBA52,CA2,ALKBH5,RPS15A,RPS16,CLSTN1,PFKM,RPL13A,COG8,COPB1,RPS15,RPS3A,CPE,CPTP,CRAT,RPS5,RPS29,RPLP0,DECR2,DHRS4,RPL6,RPS24,RPLP1,SLC25A4,RPL8,RPL9,ECI2,GSG1L,EIF2D,IDH2,EIF5A,EXOC1,FAM160A2,RPS27,FAM3D,FAU,RPS20,FIS1,FLVCR2,RPL27A,GABARAP,GAPDH,RPL30,GDI1,GLUL,GNAS,GNPAT,GOLGA2,GOLGA4,RPL7…
GO:BP	establishment of protein localization	GO:0045184	0.000125376	3.90179	2199	1126	199	17847	ABCA1,NECAB3,AHCYL1,AP2S1,AP3S1,APOC2,ARF5,ARL2,RPL21,RPS11,RPS4Y1,RPS14,RPL27,ATP6V1G1,AZGP1,BAG6,BTF3,UBA52,ALKBH5,RPS15A,RPS16,CLSTN1,PFKM,RPL13A,COG8,COPB1,RPS15,RPS3A,CPTP,CRAT,RPS5,RPS29,RPLP0,DECR2,DHRS4,RPL6,RPS24,RPLP1,SLC25A4,RPL8,RPL9,ECI2,GSG1L,EIF2D,IDH2,EIF5A,EXOC1,FAM160A2,RPS27,FAM3D,FAU,RPS20,FIS1,RPL27A,GABARAP,GAPDH,RPL30,GDI1,GLUL,GNAS,GNPAT,GOLGA2,GOLGA4,RPL7,GSTK1,HADH,RPL4,…
GO:BP	cellular component disassembly	GO:0022411	0.000144609	3.83981	546	1126	68	17847	ACTN2,ADD3,AIFM1,MRPS7,ATG14,ATG2A,BECN1,C16ORF45,CALCOCO2,CAPN2,VDAC1,TMOD4,DDIT4,EIF2D,EIF5A,EPS8,FIS1,GABARAP,MRPL33,GOLGA2,HK2,HSPA2,HSPA8,IST1,AURKAIP1,KLK7,LAMC1,ENDOG,LMOD1,LMOD2,MRPL11,MFN2,MID1IP1,MRPL16,MRPL2,MRPL23,MRPL34,MRPL35,MRPL40,MRPL41,MRPL46,MRPL52,MRPL55,MRPS18B,MRPS33,MRRF,MTIF2,MTIF3,TRIM54,OXA1L,PAM16,PINK1,PPARGC1A,DUSP3,RPL23,HAX1,CTDNEP1,SCAF8,SCUBE1,SLN,SQSTM1,TBC1D25,M…
GO:BP	nucleotide metabolic process	GO:0009117	0.000144609	3.83981	546	1126	68	17847	TPI1,COX5B,ACOT1,ACOT13,ACSL1,ACTN3,ADSL,AK1,AK8,AMPD1,APP,PGAM2,ATP6,PFKM,ADSSL1,CYC1,NMNAT3,DBI,DDIT4,PGM1,DLAT,DLST,IDH2,GAPDH,GDA,GMPR,GPD1,HK2,HSD17B12,IMPDH2,JMJD8,ENO3,MLYCD,MPC1,GPI,NME1-NME2,NME7,NMRK1,NMRK2,NOS1,NT5C1A,NUDT17,NUDT3,NUPR1,OGDH,PDE4B,PDHA1,PDHB,PDK2,PDK4,HSD17B8,ATP5J,PGK1,PINK1,PKM,PPARGC1A,RHOQ,LDHA,ACAT1,TECR,ATP5G1,SCD5,SLC25A12,SMARCAD1,SUCLA2,SUCLG1,SUCLG2,NPPA
GO:BP	proton transmembrane transport	GO:1902600	0.000150255	3.82317	159	1126	30	17847	COX5B,NDUFA4,COX6A2,COX7C,APOPT1,ATP2A1,COX4I1,ATP6,ATP6AP1L,ATP6V1G1,SLC25A3,COX17,COX3,COX6C,COX7A2,COX7A2L,CYC1,COX6B1,COX7B,NDUFS7,ND4,PHB2,NNT,COX7A1,ATP5J,PPIF,COX8A,ATP5G1,COX5A,ATP2A2
GO:BP	fatty acid beta-oxidation	GO:0006635	0.000171228	3.76642	72	1126	19	17847	ABCD3,ACAD11,ACADM,ACADVL,AUH,CRAT,DECR1,DECR2,ECHDC2,ECHS1,ECI2,ETFB,ETFDH,HADH,ACADS,MLYCD,PEX2,ACAT1,ECH1
GO:BP	ribosomal large subunit assembly	GO:0000027	0.000187857	3.72617	29	1126	12	17847	RPL3L,RPLP0,RPL6,RPL38,RPL10,MRPL11,RPL11,RPL12,RPL23A,RPL3,RPL5,RPL24
GO:BP	regulation of muscle contraction	GO:0006937	0.000235797	3.62746	171	1126	31	17847	ACTN3,ATP1A2,ATP2A1,CTNNA3,BIN1,GSTO1,HRC,HSPB6,MIR1-2,MYH7,MYL2,MYL3,MYLK2,NMUR2,NOS1,PDE4B,PLN,PPP1R12B,TPM1,CASQ1,SMTN,ATP2A2,SOD1,TMEM38A,TNNC1,TNNC2,TNNI1,TNNI2,TNNT1,TNNT3,NPPA
GO:BP	nucleoside phosphate metabolic process	GO:0006753	0.000254047	3.59509	554	1126	68	17847	TPI1,COX5B,ACOT1,ACOT13,ACSL1,ACTN3,ADSL,AK1,AK8,AMPD1,APP,PGAM2,ATP6,PFKM,ADSSL1,CYC1,NMNAT3,DBI,DDIT4,PGM1,DLAT,DLST,IDH2,GAPDH,GDA,GMPR,GPD1,HK2,HSD17B12,IMPDH2,JMJD8,ENO3,MLYCD,MPC1,GPI,NME1-NME2,NME7,NMRK1,NMRK2,NOS1,NT5C1A,NUDT17,NUDT3,NUPR1,OGDH,PDE4B,PDHA1,PDHB,PDK2,PDK4,HSD17B8,ATP5J,PGK1,PINK1,PKM,PPARGC1A,RHOQ,LDHA,ACAT1,TECR,ATP5G1,SCD5,SLC25A12,SMARCAD1,SUCLA2,SUCLG1,SUCLG2,NPPA
GO:BP	transport	GO:0006810	0.000279383	3.5538	5296	1126	413	17847	ABCA1,ABCA8,ABCD3,COX5B,NDUFA4,ACSL1,ACTN2,ACTR1B,ADD3,NECAB3,AHCYL1,COX6A2,COX7C,AMIGO1,ANXA2,AP2S1,AP3S1,NDUFC2,APOC2,APOL3,APOLD1,APOPT1,APP,ARF5,ARL2,RPL21,ARPP19,DHRS7C,ATAD3B,ATG14,ATP13A4,ATP1A2,ATP2A1,RPS11,RPS4Y1,RPS14,RPL27,COX4I1,ATP6,ATP6AP1L,ATP6V1G1,AZGP1,BANF1,BECN1,BLOC1S1,BRI3,BTF3,UBA52,CA14,CA2,CA3,CACNA1S,CACNG6,CAMK2B,SLC25A3,ALKBH5,RPS15A,RPS16,CLCN1,CLIC5,CLSTN1,PFKM,RPL13A…
GO:BP	establishment of localization	GO:0051234	0.000301073	3.52133	5419	1126	421	17847	ABCA1,ABCA8,ABCD3,COX5B,NDUFA4,ACSL1,ACTN2,ACTR1B,ADD3,NECAB3,AHCYL1,COX6A2,COX7C,AMIGO1,ANXA2,AP2S1,AP3S1,NDUFC2,APOC2,APOL3,APOLD1,APOPT1,APP,ARF5,ARL2,RPL21,ARPP19,DHRS7C,ATAD3B,ATG14,ATP13A4,ATP1A2,ATP2A1,RPS11,RPS4Y1,RPS14,RPL27,COX4I1,ATP6,ATP6AP1L,ATP6V1G1,AZGP1,BAG6,BANF1,BECN1,BLOC1S1,BRI3,BTF3,UBA52,CA14,CA2,CA3,CACNA1S,CACNG6,CAMK2B,SLC25A3,ALKBH5,CCDC155,RPS15A,RPS16,CLCN1,CLIC5,CLSTN…
GO:BP	mitochondrial translation	GO:0032543	0.000316006	3.5003	138	1126	27	17847	MRPS7,COA3,MRPL33,NGRN,AURKAIP1,LRPPRC,MRPL11,MRPL16,MRPL2,MRPL23,MRPL34,MRPL35,MRPL40,MRPL41,MRPL46,MRPL52,MRPL55,MRPS18B,MRPS33,MRRF,MTIF2,MTIF3,NDUFA7,NOA1,OXA1L,MRPL4,TUFM
GO:BP	cellular component organization or biogenesis	GO:0071840	0.000323995	3.48946	6636	1126	501	17847	NDUFB10,ABCA1,ABCD3,EIF3K,ACOT13,ACTA1,ACTN2,ACTN3,ACTR1B,ADD3,ADIPOR1,ADRM1,ADSL,AEBP1,SYNPO,AIFM1,NDUFB4,ALAS1,ALDH5A1,AMIGO1,ANAPC1,ANXA2,AP2S1,NDUFC2,APOC2,MRPS7,APOPT1,APP,ARHGEF6,ARL2,ARX,COA3,ASH2L,ATAD3B,NDUFA8,ATG14,ATG2A,ATP2A1,NDUFV2,RPS14,RPL27,ATP6,ATP6V1G1,ATPAF1,BAG6,BANF1,BCS1L,BECN1,PARVB,BIRC2,BLOC1S1,BRD3,NDUFB11,BTG1,ESRRA,UBA52,C16ORF45,CALCOCO2,CAMK2B,CAPN2,CARM1,CCDC151,CCD…
GO:BP	protein-containing complex disassembly	GO:0032984	0.000350534	3.45527	330	1126	47	17847	ACTN2,ADD3,MRPS7,ATG14,C16ORF45,CALCOCO2,TMOD4,DDIT4,EIF2D,EIF5A,EPS8,GABARAP,MRPL33,HSPA8,IST1,AURKAIP1,LMOD1,LMOD2,MRPL11,MID1IP1,MRPL16,MRPL2,MRPL23,MRPL34,MRPL35,MRPL40,MRPL41,MRPL46,MRPL52,MRPL55,MRPS18B,MRPS33,MRRF,MTIF2,MTIF3,TRIM54,OXA1L,RPL23,SCAF8,SLN,TBC1D25,MRPL4,TSG101,TWF2,VPS4A,VPS4B,ZMPSTE24
GO:BP	carbohydrate biosynthetic process	GO:0016051	0.000449984	3.3468	213	1126	35	17847	ACADM,TPI1,MDH2,ARPP19,PGAM2,PPP1R3C,B3GNT9,CLK2,CRTC2,PGM1,DYRK2,EGF,GAPDH,GBE1,GOT1,GPD1,AGL,ENO3,SLC25A11,MDH1,ATF4,GPI,NR1D1,PDK2,PGK1,PHKG1,PPARGC1A,PPP1CB,IMPA2,SLC25A12,GYG1,SORBS1,FBP2,AKR1B1,UGP2
GO:BP	organic acid catabolic process	GO:0016054	0.00052244	3.28196	273	1126	41	17847	ABCD3,ACAD11,ACADM,ACADVL,ALDH5A1,AMT,AUH,BCKDK,CARNS1,CRAT,DCXR,DECR1,DECR2,DLST,ECHDC2,ECHS1,ECI2,ETFB,ETFDH,GCSH,GLUL,GOT1,GPT2,HADH,HIBADH,HSD17B10,ACADS,MLYCD,MPST,MTHFS,TXN2,NOS1,OGDH,PCCB,PEX2,PHYH,QDPR,ACAT1,ECH1,LDHD,SLC27A4
GO:BP	carboxylic acid catabolic process	GO:0046395	0.00052244	3.28196	273	1126	41	17847	ABCD3,ACAD11,ACADM,ACADVL,ALDH5A1,AMT,AUH,BCKDK,CARNS1,CRAT,DCXR,DECR1,DECR2,DLST,ECHDC2,ECHS1,ECI2,ETFB,ETFDH,GCSH,GLUL,GOT1,GPT2,HADH,HIBADH,HSD17B10,ACADS,MLYCD,MPST,MTHFS,TXN2,NOS1,OGDH,PCCB,PEX2,PHYH,QDPR,ACAT1,ECH1,LDHD,SLC27A4
GO:BP	purine ribonucleotide biosynthetic process	GO:0009152	0.000796812	3.09864	171	1126	30	17847	COX5B,ACSL1,ADSL,AK1,AMPD1,ATP6,ADSSL1,CYC1,DLAT,HSD17B12,IMPDH2,MLYCD,MPC1,NME1-NME2,NME7,PDHA1,PDHB,PDK2,PDK4,HSD17B8,ATP5J,PINK1,PKM,PPARGC1A,ACAT1,TECR,ATP5G1,SCD5,SLC25A12,NPPA
GO:BP	transmembrane transport	GO:0055085	0.000922124	3.03521	1625	1126	152	17847	ABCA1,ABCA8,ABCD3,COX5B,NDUFA4,ACTN2,ADD3,AHCYL1,COX6A2,COX7C,AMIGO1,ANXA2,APOPT1,APP,ARPP19,DHRS7C,ATP13A4,ATP1A2,ATP2A1,COX4I1,ATP6,ATP6AP1L,ATP6V1G1,AZGP1,UBA52,CA2,CACNA1S,CACNG6,SLC25A3,CLCN1,CLIC5,CNNM4,COX17,COX3,VDAC1,COX6C,COX7A2,COX7A2L,CYC1,CAPN3,COX6B1,SLC25A4,GSG1L,BIN1,FHL1,FKBP1A,FLVCR2,GPD1L,GSTO1,SCN1B,HK2,HRC,HSPA2,HSPA8,SNTA1,ISCU,JPH1,KCNH3,KCNJ12,KCNK17,KCNS3,BSND,SLC25A11,CO…
GO:BP	monocarboxylic acid catabolic process	GO:0072329	0.000952478	3.02114	128	1126	25	17847	ABCD3,ACAD11,ACADM,ACADVL,ALDH5A1,AUH,CRAT,DCXR,DECR1,DECR2,ECHDC2,ECHS1,ECI2,ETFB,ETFDH,HADH,ACADS,MLYCD,PCCB,PEX2,PHYH,ACAT1,ECH1,LDHD,SLC27A4
GO:BP	striated muscle tissue development	GO:0014706	0.000979253	3.00911	395	1126	52	17847	ACADM,ACTA1,ACTN2,ACTN3,NDUFV2,YBX3,MYOZ1,EEF2,CSRP3,DLL4,ASB2,FHOD3,FKBP1A,ID2,SVIL,PI16,MAFF,MEF2C,MESP1,MIR1-2,MYH14,MYH6,MYH7,MYL2,MYL3,MYLK2,MYLPF,NACA,NUPR1,KLHL41,PLN,PRKAR1A,RBFOX1,MYOM1,TPM1,CASQ1,RYR1,SEMA3C,SRPK3,STAC3,TCAP,TNNC1,TNNI1,NEB,SIRT2,TTN,NPPA,VEGFA,VGLL2,XIRP2,ZFPM1,ZMPSTE24
GO:BP	succinate metabolic process	GO:0006105	0.00108568	2.9643	7	1126	6	17847	ALDH5A1,SDHB,SDHA,SUCLA2,SUCLG1,SUCLG2
GO:BP	fatty acid catabolic process	GO:0009062	0.00113083	2.9466	104	1126	22	17847	ABCD3,ACAD11,ACADM,ACADVL,AUH,CRAT,DECR1,DECR2,ECHDC2,ECHS1,ECI2,ETFB,ETFDH,HADH,ACADS,MLYCD,PCCB,PEX2,PHYH,ACAT1,ECH1,SLC27A4
GO:BP	muscle organ development	GO:0007517	0.00125025	2.903	409	1126	53	17847	ACTA1,ACTN3,ARID5B,BTBD1,YBX3,MAPK12,MYOZ1,CD164,CHKB,EEF2,CRYAB,CSRP3,CAPN3,DLL4,FHL1,ASB2,FKBP1A,ID3,FHL3,ITGB1BP2,JPH1,SVIL,PI16,MAFF,MEF2C,MIR1-2,MYH14,MYH6,MYH7,MYL2,MYL3,MYLK2,MYLPF,NACA,NUPR1,KLHL41,RBFOX1,MYOM1,TPM1,CASQ1,SMTN,RYR1,SRPK3,STAC3,TCAP,TNNC1,TNNI1,NEB,SIRT2,TTN,VGLL2,XIRP2,ZFPM1
GO:BP	skeletal muscle adaptation	GO:0043501	0.00125204	2.90238	28	1126	11	17847	ACTA1,ACTN3,CAMK2B,MYOZ1,MYH7,MYOC,PPARGC1A,ATP2A2,TNNC1,TNNI1,TNNT1
GO:BP	regulation of striated muscle contraction	GO:0006942	0.00137073	2.86305	97	1126	21	17847	ACTN3,ATP1A2,ATP2A1,CTNNA3,BIN1,GSTO1,HRC,MIR1-2,MYH7,MYL2,MYL3,NOS1,PDE4B,PLN,CASQ1,SMTN,ATP2A2,TMEM38A,TNNI1,TNNT3,NPPA
GO:BP	muscle tissue development	GO:0060537	0.00157341	2.80316	412	1126	53	17847	ACADM,ACTA1,ACTN2,ACTN3,NDUFV2,YBX3,MYOZ1,EEF2,CSRP3,DLL4,ASB2,FHOD3,FKBP1A,ID2,SVIL,PI16,MAFF,MEF2C,MESP1,MIR1-2,MYH14,MYH6,MYH7,MYL2,MYL3,MYLK2,MYLPF,NACA,NUPR1,KLHL41,PLN,PPARGC1A,PRKAR1A,RBFOX1,MYOM1,TPM1,CASQ1,RYR1,SEMA3C,SRPK3,STAC3,TCAP,TNNC1,TNNI1,NEB,SIRT2,TTN,NPPA,VEGFA,VGLL2,XIRP2,ZFPM1,ZMPSTE24
GO:BP	ribosomal small subunit biogenesis	GO:0042274	0.00194002	2.71219	68	1126	17	17847	MRPS7,RPS14,RPS16,RPS15,RPS5,RPS24,RPS27,RPL38,RPS28,RPS6,RPS17,RPS19,RPS21,RPS7,RPS8,RPSA,RPS10
GO:BP	nucleobase-containing small molecule metabolic process	GO:0055086	0.00234428	2.62999	635	1126	72	17847	TPI1,COX5B,ACOT1,ACOT13,ACSL1,ACTN3,ADSL,AK1,AK8,AMPD1,APP,PGAM2,ATP6,PFKM,ADSSL1,CYC1,NMNAT3,DBI,DDIT4,PGM1,DLAT,DLST,IDH2,GAPDH,GDA,GMPR,GPD1,MACROD1,HK2,HSD17B12,IMPDH2,JMJD8,ENO3,MLYCD,MPC1,GPI,NME1-NME2,NME7,NMRK1,NMRK2,NOS1,NT5C1A,NUDT17,NUDT3,NUPR1,OGDH,PDE4B,PDHA1,PDHB,PDK2,PDK4,HSD17B8,ATP5J,PGK1,PINK1,PKM,PPARGC1A,RHOQ,LDHA,ACAT1,TECR,ATP5G1,APOBEC2,SCD5,SLC25A12,SMARCAD1,SUCLA2,SUCLG1,…
GO:BP	cellular protein complex disassembly	GO:0043624	0.00234968	2.62899	218	1126	34	17847	ACTN2,ADD3,MRPS7,C16ORF45,TMOD4,EIF5A,EPS8,MRPL33,HSPA8,AURKAIP1,LMOD1,LMOD2,MRPL11,MID1IP1,MRPL16,MRPL2,MRPL23,MRPL34,MRPL35,MRPL40,MRPL41,MRPL46,MRPL52,MRPL55,MRPS18B,MRPS33,MRRF,TRIM54,OXA1L,SLN,MRPL4,TWF2,VPS4A,VPS4B
GO:BP	protein metabolic process	GO:0019538	0.00235905	2.62726	5905	1126	447	17847	AATK,ABCA1,EIF3K,ACSL1,ACTN2,ADAMTS1,EIF1,ADRM1,AEBP1,NECAB3,AIFM1,MDH2,ALG11,ANAPC1,ANAPC13,EIF4A2,ANXA2,AP2S1,APOL3,APOLD1,MRPS7,APOPT1,APP,ARAF,ARHGEF6,RPL21,ARPP19,COA3,ASB14,ASH2L,ATG14,RPS11,RPS4Y1,RPS14,RPL27,ATRAID,PPP1R3C,B3GNT9,BAG6,BCKDK,BECN1,BIRC2,BLOC1S1,BTBD1,YBX3,UBA52,EEF1D,MAPK12,CAMK2B,CAPN2,CARM1,MYOZ1,CCNB3,CDC123,RPS15A,CEP85,CHRDL1,CIDEB,RPS16,CLK1,CLK2,CLPP,RPL13A,CNTD2,RP…
GO:BP	rRNA processing	GO:0006364	0.0025536	2.59285	209	1126	33	17847	RPS14,RPL27,RPS16,RPS15,RPS24,RPS27,FBL,FBLL1,RPL7,GTPBP4,IMP4,RPS9,RPL35,RPL10A,NSA2,RPS28,PIH1D1,RPL11,RPS6,RPL14,RPL35A,RPL5,RPL7A,NHP2,RPS17,RPS19,RPS2,RPS21,RPS7,RPS8,RPUSD1,YBEY,ZNHIT3
GO:BP	regulation of muscle system process	GO:0090257	0.00262023	2.58166	259	1126	38	17847	ACTN3,ATP1A2,ATP2A1,BECN1,CAMK2B,CTNNA3,BIN1,FBXO32,GSTO1,HRC,HSPB6,PI16,MIR1-2,MYH7,MYL2,MYL3,MYLK2,NMUR2,NOS1,NR4A3,PDE4B,PLN,PPARGC1A,PPP1R12B,TPM1,CASQ1,SMTN,ATP2A2,SLN,SOD1,TMEM38A,TNNC1,TNNC2,TNNI1,TNNI2,TNNT1,TNNT3,NPPA
GO:BP	sarcoplasmic reticulum calcium ion transport	GO:0070296	0.00281615	2.55034	42	1126	13	17847	DHRS7C,ATP1A2,ATP2A1,GSTO1,HRC,MIR1-2,PLN,CASQ1,ATP2A2,RYR1,SLN,TMEM38A,ZMPSTE24
GO:BP	ribonucleotide biosynthetic process	GO:0009260	0.00397567	2.40059	184	1126	30	17847	COX5B,ACSL1,ADSL,AK1,AMPD1,ATP6,ADSSL1,CYC1,DLAT,HSD17B12,IMPDH2,MLYCD,MPC1,NME1-NME2,NME7,PDHA1,PDHB,PDK2,PDK4,HSD17B8,ATP5J,PINK1,PKM,PPARGC1A,ACAT1,TECR,ATP5G1,SCD5,SLC25A12,NPPA
GO:BP	mitochondrial translational elongation	GO:0070125	0.00411232	2.38591	87	1126	19	17847	MRPS7,MRPL33,AURKAIP1,MRPL11,MRPL16,MRPL2,MRPL23,MRPL34,MRPL35,MRPL40,MRPL41,MRPL46,MRPL52,MRPL55,MRPS18B,MRPS33,OXA1L,MRPL4,TUFM
GO:BP	cytoplasmic translational initiation	GO:0002183	0.00414126	2.38287	31	1126	11	17847	EIF3K,EIF4A2,RPL13A,EIF3F,EIF2D,EIF3E,EIF3H,EIF4G1,EIF3L,EIF3G,EIF3I
GO:BP	carbohydrate metabolic process	GO:0005975	0.00415336	2.3816	633	1126	71	17847	ACADM,TPI1,ACTN3,ADIPOR1,ALDH5A1,MDH2,APP,ARPP19,PGAM2,PPP1R3C,B3GNT9,CLK2,PFKM,CRTC2,CS,DCXR,DDIT4,PGM1,DLAT,DYRK2,EGF,IDH2,FUOM,GANAB,GAPDH,GBE1,GNPTG,GOT1,GPD1,GPD1L,GSTO1,HK2,AGL,IGFBP3,JMJD8,ENO3,LDHB,SLC25A11,AKR7A2,MDH1,MLYCD,PYGM,ATF4,GPI,NISCH,NR1D1,NUPR1,OGDH,PDHA1,PDHB,PDK2,PDK4,PGK1,PHKG1,PKM,PPARGC1A,PPP1CB,PPP1CC,RORC,LDHA,SIAE,IMPA2,SLC25A12,SLC37A4,SLC45A3,GYG1,SORBS1,FBP2,AKR1B1,…
GO:BP	purine nucleotide biosynthetic process	GO:0006164	0.00416202	2.3807	194	1126	31	17847	COX5B,ACSL1,ADSL,AK1,AMPD1,ATP6,ADSSL1,CYC1,DLAT,HSD17B12,IMPDH2,MLYCD,MPC1,NME1-NME2,NME7,NOS1,PDHA1,PDHB,PDK2,PDK4,HSD17B8,ATP5J,PINK1,PKM,PPARGC1A,ACAT1,TECR,ATP5G1,SCD5,SLC25A12,NPPA
GO:BP	striated muscle adaptation	GO:0014888	0.00428978	2.36756	57	1126	15	17847	ACTA1,ACTN3,CAMK2B,MYOZ1,MEF2C,MYH6,MYH7,MYOC,PPARGC1A,ATP2A2,TCAP,TNNC1,TNNI1,TNNT1,NPPA
GO:BP	mitochondrial gene expression	GO:0140053	0.004425	2.35409	166	1126	28	17847	MRPS7,COA3,MRPL33,NGRN,HSD17B10,AURKAIP1,LRPPRC,MRPL11,MRPL16,MRPL2,MRPL23,MRPL34,MRPL35,MRPL40,MRPL41,MRPL46,MRPL52,MRPL55,MRPS18B,MRPS33,MRRF,MTIF2,MTIF3,NDUFA7,NOA1,OXA1L,MRPL4,TUFM
GO:BP	thioester metabolic process	GO:0035383	0.00459354	2.33785	104	1126	21	17847	ACOT1,ACOT13,ACSL1,DBI,DLAT,DLST,HSD17B12,MLYCD,MPC1,OGDH,PDHA1,PDHB,PDK2,PDK4,HSD17B8,ACAT1,TECR,SCD5,SUCLA2,SUCLG1,SUCLG2
GO:BP	acyl-CoA metabolic process	GO:0006637	0.00459354	2.33785	104	1126	21	17847	ACOT1,ACOT13,ACSL1,DBI,DLAT,DLST,HSD17B12,MLYCD,MPC1,OGDH,PDHA1,PDHB,PDK2,PDK4,HSD17B8,ACAT1,TECR,SCD5,SUCLA2,SUCLG1,SUCLG2
GO:BP	cellular carbohydrate metabolic process	GO:0044262	0.00474599	2.32367	286	1126	40	17847	ACADM,TPI1,ACTN3,ADIPOR1,ARPP19,PPP1R3C,B3GNT9,CLK2,PFKM,DDIT4,PGM1,DYRK2,IDH2,GBE1,GNPTG,GOT1,HK2,AGL,IGFBP3,MLYCD,PYGM,NR1D1,NUPR1,PDK2,PDK4,PHKG1,PPARGC1A,PPP1CB,PPP1CC,RORC,IMPA2,SLC25A12,SLC37A4,SLC45A3,GYG1,SORBS1,FBP2,AKR1B1,UGP2,ZMPSTE24
GO:BP	mitochondrial translational termination	GO:0070126	0.00493825	2.30643	88	1126	19	17847	MRPS7,MRPL33,AURKAIP1,MRPL11,MRPL16,MRPL2,MRPL23,MRPL34,MRPL35,MRPL40,MRPL41,MRPL46,MRPL52,MRPL55,MRPS18B,MRPS33,MRRF,OXA1L,MRPL4
GO:BP	purine-containing compound biosynthetic process	GO:0072522	0.00533571	2.27281	206	1126	32	17847	COX5B,ACSL1,ADSL,AK1,AMPD1,ATP6,ADSSL1,CYC1,DLAT,GMPR,HSD17B12,IMPDH2,MLYCD,MPC1,NME1-NME2,NME7,NOS1,PDHA1,PDHB,PDK2,PDK4,HSD17B8,ATP5J,PINK1,PKM,PPARGC1A,ACAT1,TECR,ATP5G1,SCD5,SLC25A12,NPPA
GO:BP	regulation of ion transmembrane transporter activity	GO:0032412	0.00733396	2.13466	270	1126	38	17847	ACTN2,AHCYL1,AMIGO1,APOPT1,APP,ATP1A2,ATP2A1,COX17,GSG1L,FHL1,FKBP1A,GPD1L,GSTO1,SCN1B,HRC,HSPA2,JPH1,MEF2C,MIR1-2,PHB2,NEDD4,FXYD1,NLGN2,NOS1,PDE4B,PINK1,PLN,PPARGC1A,PPIF,PTPN3,CASQ1,S100A1,SLN,STAC2,STAC3,STOM,TLR9,NPPA
GO:BP	fatty acid metabolic process	GO:0006631	0.00766302	2.1156	378	1126	48	17847	ABCD3,ACAD11,ACADM,ACADVL,ACOT1,ACSL1,ADIPOR1,ALDH5A1,APOC2,AUH,CRAT,DECR1,DECR2,ECHDC2,ECHDC3,ECHS1,ECI2,ETFB,ETFDH,FAAH2,FABP3,GNPAT,GPX4,GSTP1,HADH,HSD17B12,ACADS,NDUFAB1,MID1IP1,MLYCD,NR4A3,PCCB,PDK2,PDK4,HSD17B8,PEX2,PHYH,CYP2S1,PLA2G4F,PPARGC1A,PTGES2,ACAT1,TECR,ECH1,NDUFS6,SCD5,SLC27A4,SLC45A3
GO:BP	rRNA metabolic process	GO:0016072	0.00815629	2.08851	220	1126	33	17847	RPS14,RPL27,RPS16,RPS15,RPS24,RPS27,FBL,FBLL1,RPL7,GTPBP4,IMP4,RPS9,RPL35,RPL10A,NSA2,RPS28,PIH1D1,RPL11,RPS6,RPL14,RPL35A,RPL5,RPL7A,NHP2,RPS17,RPS19,RPS2,RPS21,RPS7,RPS8,RPUSD1,YBEY,ZNHIT3
GO:BP	cellular process	GO:0009987	0.00873343	2.05882	16113	1126	1058	17847	NDUFB10,AATK,ABCA1,ABCD3,EIF3K,ABI3,ACAD11,ACADM,TPI1,ACADVL,COX5B,NDUFA4,ACOT1,ACOT13,ACSL1,ACTA1,ACTN2,ACTN3,ACTR1B,ACY3,ACYP2,ADAMTS1,EIF1,ADD3,ADIPOR1,ADRM1,ADSL,LMO1,AEBP1,NECAB3,AGMAT,SYNPO,AHCYL1,AIFM1,AK1,AK8,COX6A2,NDUFB4,ALAS1,ALDH5A1,MDH2,ALG11,SP8,COX7C,AMIGO1,AMPD1,AMT,ANAPC1,ANAPC13,EIF4A2,ANXA2,AP2S1,AP3S1,APCDD1,NDUFC2,APOC2,APOL3,APOLD1,MRPS7,APOPT1,APP,ARAF,ARHGAP29,ARHGEF6,ARID…
GO:BP	ribose phosphate biosynthetic process	GO:0046390	0.00876189	2.0574	191	1126	30	17847	COX5B,ACSL1,ADSL,AK1,AMPD1,ATP6,ADSSL1,CYC1,DLAT,HSD17B12,IMPDH2,MLYCD,MPC1,NME1-NME2,NME7,PDHA1,PDHB,PDK2,PDK4,HSD17B8,ATP5J,PINK1,PKM,PPARGC1A,ACAT1,TECR,ATP5G1,SCD5,SLC25A12,NPPA
GO:BP	dicarboxylic acid metabolic process	GO:0043648	0.00940683	2.02656	100	1126	20	17847	ALDH5A1,MDH2,ADSSL1,DLST,IDH2,FH,GLUL,GOT1,GPT2,MDH1,MTHFS,OGDH,PHYH,GRHPR,SDHB,SDHA,SLC25A12,SUCLA2,SUCLG1,SUCLG2
GO:BP	small molecule biosynthetic process	GO:0044283	0.00976505	2.01033	721	1126	77	17847	ABCD3,ACADM,TPI1,ACADVL,ADIPOR1,MDH2,APOC2,ARPP19,ASNSD1,PGAM2,CARNS1,CLK2,COQ10A,MGST3,CRTC2,DECR2,PGM1,EGF,GAPDH,GATM,GDA,GGT7,GLUL,GOT1,GPD1,GPT2,GPX4,COQ9,HSD17B12,IDI1,IMPDH2,ITPKC,ENO3,SLC25A11,MDH1,NDUFAB1,MID1IP1,MLYCD,MTHFS,ATF4,GPI,NME1-NME2,NME7,NR1D1,NT5C1A,NUDT17,NUDT3,OSBPL9,PCCB,PDE4B,GAMT,PDK2,PDK4,HSD17B8,PGK1,PKM,PLA2G4F,PLCD3,PLCD4,PPARGC1A,PTGES2,PTS,QDPR,FDFT1,ACAT1,TECR,NDUF…
GO:BP	cellular component organization	GO:0016043	0.0106808	1.9714	6454	1126	478	17847	NDUFB10,ABCA1,ABCD3,EIF3K,ACOT13,ACTA1,ACTN2,ACTN3,ACTR1B,ADD3,ADIPOR1,ADRM1,ADSL,AEBP1,SYNPO,AIFM1,NDUFB4,ALAS1,ALDH5A1,AMIGO1,ANAPC1,ANXA2,AP2S1,NDUFC2,APOC2,MRPS7,APOPT1,APP,ARHGEF6,ARL2,ARX,COA3,ASH2L,ATAD3B,NDUFA8,ATG14,ATG2A,ATP2A1,NDUFV2,RPS14,ATP6,ATP6V1G1,ATPAF1,BAG6,BANF1,BCS1L,BECN1,PARVB,BIRC2,BLOC1S1,BRD3,NDUFB11,BTG1,ESRRA,UBA52,C16ORF45,CALCOCO2,CAMK2B,CAPN2,CARM1,CCDC151,CCDC155,M…
GO:BP	nucleoside diphosphate phosphorylation	GO:0006165	0.010704	1.97045	136	1126	24	17847	TPI1,ACTN3,AK1,AK8,APP,PGAM2,PFKM,DDIT4,PGM1,GAPDH,GPD1,HK2,JMJD8,ENO3,GPI,NME1-NME2,NME7,NUPR1,OGDH,PGK1,PKM,PPARGC1A,LDHA,SUCLG1
GO:BP	nucleotide phosphorylation	GO:0046939	0.013916	1.85648	138	1126	24	17847	TPI1,ACTN3,AK1,AK8,APP,PGAM2,PFKM,DDIT4,PGM1,GAPDH,GPD1,HK2,JMJD8,ENO3,GPI,NME1-NME2,NME7,NUPR1,OGDH,PGK1,PKM,PPARGC1A,LDHA,SUCLG1
GO:BP	regulation of transmembrane transporter activity	GO:0022898	0.0148048	1.8296	278	1126	38	17847	ACTN2,AHCYL1,AMIGO1,APOPT1,APP,ATP1A2,ATP2A1,COX17,GSG1L,FHL1,FKBP1A,GPD1L,GSTO1,SCN1B,HRC,HSPA2,JPH1,MEF2C,MIR1-2,PHB2,NEDD4,FXYD1,NLGN2,NOS1,PDE4B,PINK1,PLN,PPARGC1A,PPIF,PTPN3,CASQ1,S100A1,SLN,STAC2,STAC3,STOM,TLR9,NPPA
GO:BP	succinyl-CoA metabolic process	GO:0006104	0.014834	1.82874	6	1126	5	17847	DLST,OGDH,SUCLA2,SUCLG1,SUCLG2
GO:BP	twitch skeletal muscle contraction	GO:0014721	0.014834	1.82874	6	1126	5	17847	ACTN3,ATP2A1,MB,MYH7,TNNT1
GO:BP	voluntary skeletal muscle contraction	GO:0003010	0.014834	1.82874	6	1126	5	17847	ACTN3,ATP2A1,MB,MYH7,TNNT1
GO:BP	response to oxidative stress	GO:0006979	0.0166731	1.77798	457	1126	54	17847	AIFM1,NDUFB4,APOPT1,APP,BECN1,BTG1,CA3,CAPN2,EEF2,MAPKAP1,CRYAB,CYCS,ETFDH,PRDX2,FBLN5,GGT7,GPX4,GSTP1,HSPA1A,ENDOG,MAPK9,MB,MIR29B2,MSRB2,NDUFA6,TXN2,ATF4,NDUFS2,ERCC1,NR4A3,PDCD10,PDK2,PDLIM1,TRAP1,PINK1,PPARGC1A,PPIF,PRDX1,PRDX6,PSMB5,RHOB,RIPK3,ROMO1,LDHA,TPM1,HBB,ATP2A2,RPS3,RWDD1,SOD1,STK24,STK25,SIRT2,ZNF622
GO:BP	translational termination	GO:0006415	0.0176163	1.75409	104	1126	20	17847	MRPS7,EIF5A,MRPL33,AURKAIP1,MRPL11,MRPL16,MRPL2,MRPL23,MRPL34,MRPL35,MRPL40,MRPL41,MRPL46,MRPL52,MRPL55,MRPS18B,MRPS33,MRRF,OXA1L,MRPL4
GO:BP	regulation of transmembrane transport	GO:0034762	0.0218845	1.65986	579	1126	64	17847	ACTN2,AHCYL1,AMIGO1,APOPT1,APP,ARPP19,DHRS7C,ATP1A2,ATP2A1,CA2,CACNA1S,CACNG6,CLCN1,CLIC5,COX17,CAPN3,GSG1L,BIN1,FHL1,FKBP1A,GPD1L,GSTO1,SCN1B,HK2,HRC,HSPA2,SNTA1,ISCU,JPH1,KCNH3,KCNJ12,KCNK17,KCNS3,MEF2C,MIR1-2,PHB2,NEDD4,FXYD1,NLGN2,NOS1,NR4A3,OAZ2,PDE4B,PIK3R1,PINK1,PLN,PPARGC1A,PPIF,PTPN3,RHOQ,CASQ1,RTN2,S100A1,SLN,SORBS1,STAC2,STAC3,STOM,TLR9,TMEM109,TMEM38A,NPPA,YWHAQ,ZMPSTE24
GO:BP	glucose catabolic process	GO:0006007	0.0219371	1.65882	36	1126	11	17847	TPI1,ACTN3,PGAM2,PFKM,GAPDH,HK2,ENO3,GPI,PGK1,PKM,SLC25A12
GO:BP	regulation of heart contraction	GO:0008016	0.0240855	1.61824	252	1126	35	17847	AHCYL1,ATP1A2,ATP2A1,CACNA1S,CACNG6,CSRP3,CTNNA3,DES,BIN1,GPD1L,GSTO1,SCN1B,HRC,HSPB7,SNTA1,KCNJ12,MIR1-2,MYH6,MYH7,MYL2,MYL3,FXYD1,NOS1,PDE4B,ATP5J,PLN,TPM1,CASQ1,SMTN,ATP2A2,RYR1,S100A1,TMEM38A,NPPA,ZMPSTE24
GO:BP	striated muscle cell differentiation	GO:0051146	0.0249793	1.60242	295	1126	39	17847	ACADM,ACTA1,ACTN2,ACTN3,CAPN2,MYOZ1,CSRP3,CAPN3,TMOD4,FHOD3,FER1L5,LMOD1,LMOD2,PI16,MEF2C,MESP1,MIR1-2,MYH6,MYL2,MYPN,NACA,NOS1,KLHL41,PRKAR1A,RBM38,MYOM1,TPM1,CASQ1,RYR1,STAC3,SYNPO2L,TCAP,TNNT1,TNNT3,NEB,TTN,NPPA,VEGFA,ZMPSTE24
GO:BP	cardiac muscle tissue morphogenesis	GO:0055008	0.0250493	1.6012	65	1126	15	17847	DLL4,FKBP1A,MYH6,MYH7,MYL2,MYL3,MYLK2,MYOM1,TPM1,TCAP,TNNC1,TNNI1,TTN,XIRP2,ZFPM1
GO:BP	ion transmembrane transport	GO:0034220	0.0255582	1.59247	1174	1126	111	17847	ABCD3,COX5B,NDUFA4,ACTN2,AHCYL1,COX6A2,COX7C,AMIGO1,ANXA2,APOPT1,APP,DHRS7C,ATP13A4,ATP1A2,ATP2A1,COX4I1,ATP6,ATP6AP1L,ATP6V1G1,CACNA1S,CACNG6,SLC25A3,CLCN1,CLIC5,CNNM4,COX17,COX3,VDAC1,COX6C,COX7A2,COX7A2L,CYC1,CAPN3,COX6B1,GSG1L,BIN1,FHL1,FKBP1A,GPD1L,GSTO1,SCN1B,HRC,HSPA2,SNTA1,ISCU,JPH1,KCNH3,KCNJ12,KCNK17,KCNS3,BSND,SLC25A11,COX7B,MEF2C,MID1IP1,MIR1-2,MPC1,NDUFS7,ND4,PHB2,NEDD4,FXYD1,NLGN2,N…
GO:BP	coenzyme metabolic process	GO:0006732	0.0286909	1.54226	254	1126	35	17847	ACOT1,ACOT13,ACSL1,AHCYL1,COQ10A,NMNAT3,DBI,DLAT,DLST,IDH2,GSTO1,COQ9,HSD17B12,MLYCD,MPC1,MTHFS,NMRK1,NMRK2,NUDT17,OGDH,PCCB,PDHA1,PDHB,PDK2,PDK4,HSD17B8,PTS,QDPR,ACAT1,TECR,NDUFA9,SCD5,SUCLA2,SUCLG1,SUCLG2
GO:BP	biosynthetic process	GO:0009058	0.0303881	1.5173	6295	1126	464	17847	ABCA1,ABCD3,EIF3K,ACADM,TPI1,ACADVL,COX5B,ACSL1,ACTN2,EIF1,ADIPOR1,ADRM1,ADSL,LMO1,AEBP1,NECAB3,AGMAT,AK1,AK8,ALAS1,MDH2,ALG11,SP8,AMPD1,EIF4A2,APOC2,MRPS7,APOPT1,APP,ARID5B,RPL21,ARPP19,ARX,COA3,ASH2L,ASNSD1,RPS11,RPS4Y1,PGAM2,RPS14,RPL27,ATP6,PPP1R3C,B3GNT9,BEX1,BHLHE40,BIRC2,BRD3,YBX3,BTF3,BTG1,ESRRA,UBA52,EEF1D,YBX1,CAPN2,CARM1,CARNS1,MYOZ1,CDC123,RPS15A,CHCHD3,CHKB,CHRDL1,CIART,RPS16,CKM,CLK…
GO:BP	cellular lipid catabolic process	GO:0044242	0.0363023	1.44007	215	1126	31	17847	ABCD3,ACAD11,ACADM,ACADVL,APOC2,AUH,CRAT,DECR1,DECR2,ECHDC2,ECHS1,ECI2,ETFB,ETFDH,FABP3,GDE1,HADH,ACADS,MLYCD,PCCB,PEX2,PHYH,PLA2G4F,PNPLA2,PNPLA4,PNPLA5,PRDX6,ACAT1,ECH1,SLC27A4,SIRT2
GO:BP	lactate metabolic process	GO:0006089	0.0409831	1.3874	20	1126	8	17847	ACTN3,HAGHL,CARNS1,HAGH,LDHA,LDHD,SLC25A12,SLC37A4
GO:BP	organic substance biosynthetic process	GO:1901576	0.0442462	1.35412	6193	1126	456	17847	ABCA1,ABCD3,EIF3K,ACADM,TPI1,ACADVL,COX5B,ACSL1,ACTN2,EIF1,ADIPOR1,ADRM1,ADSL,LMO1,AEBP1,NECAB3,AGMAT,AK1,AK8,ALAS1,MDH2,ALG11,SP8,AMPD1,EIF4A2,APOC2,MRPS7,APP,ARID5B,RPL21,ARPP19,ARX,COA3,ASH2L,ASNSD1,RPS11,RPS4Y1,PGAM2,RPS14,RPL27,ATP6,PPP1R3C,B3GNT9,BEX1,BHLHE40,BIRC2,BRD3,YBX3,BTF3,BTG1,ESRRA,UBA52,EEF1D,YBX1,CAPN2,CARM1,CARNS1,MYOZ1,CDC123,RPS15A,CHCHD3,CHKB,CHRDL1,CIART,RPS16,CKM,CLK2,PFKM,…
GO:CC	cytosolic ribosome	GO:0022626	1.30973e-69	68.8828	107	1172	79	18842	RPL21,RPS11,RPS4Y1,RPS14,RPL27,UBA52,RPS15A,RPS16,RPL13A,RPL3L,RPS15,RPS3A,RPS5,RPS29,RPLP0,DDX3X,RPL6,RPS24,RPLP1,RPL8,RPL9,EIF2D,RPS27,FAU,RPS20,FXR2,RPL27A,RPL30,RPL7,RPL4,RPS9,RPL22,RPL37,RPL38,RPL10,RPL32,RPL35,RPL29,RPL10A,RPS25,RPL13,RPS28,RPL15,PPARGC1A,RPL11,RPL12,RPS6,RPL14,RPL18A,RPL39,RPL23,RPL23A,RPS23,RPL3,RPL34,RPL35A,RPL36,RPL36A,RPL31,RPL37A,RPL41,RPL5,RPL7A,RPL24,RPLP2,RPS17,RPS…
GO:CC	ribosomal subunit	GO:0044391	8.3668e-61	60.0774	190	1172	95	18842	MRPS7,RPL21,RPS11,RPS4Y1,RPS14,RPL27,UBA52,RPS15A,RPS16,RPL13A,RPL3L,RPS15,RPS3A,RPS5,RPS29,RPLP0,DDX3X,RPL6,RPS24,RPLP1,RPL8,RPL9,EIF2D,RPS27,FAU,RPS20,FXR2,RPL27A,RPL30,MRPL33,RPL7,RPL4,RPS9,RPL22,RPL37,RPL38,RPL10,RPL32,RPL35,MRPL11,NDUFAB1,MRPL16,MRPL2,MRPL23,MRPL34,MRPL35,RPL29,MRPL40,MRPL41,MRPL46,MRPL52,MRPL55,MRPS18B,MRPS33,RPL10A,RPS25,RPL13,RPS28,RPL15,RPL11,RPL12,RPS6,RPL14,RPL18A,RPL3…
GO:CC	mitochondrial part	GO:0044429	9.86187e-59	58.006	1056	1172	220	18842	NDUFB10,ACAD11,ACADM,ACADVL,COX5B,NDUFA4,ACSL1,AIFM1,COX6A2,NDUFB4,ALAS1,ALDH5A1,MDH2,COX7C,AMT,NDUFC2,MRPS7,APOPT1,ARL2,COA3,ATAD3B,NDUFA8,NDUFV2,UQCRC1,COX4I1,ATP6,AUH,BCKDK,BCS1L,BECN1,BLOC1S1,NDUFB11,UBA52,SLC25A3,CAPN2,CHCHD3,CHCHD6,CISD1,CLPP,COQ10A,COX17,COX3,VDAC1,COX6C,COX7A2,COX7A2L,CRAT,CS,CYC1,NMNAT3,CYCS,DDX3X,DECR1,COX6B1,APOO,DLAT,DLST,DNAJA3,SLC25A4,UQCRH,ECHS1,NDUFB7,UQCRFS1,NDUF…
GO:CC	ribosome	GO:0005840	2.10206e-57	56.6774	242	1172	103	18842	MRPS7,RPL21,RPS11,RPS4Y1,RPS14,RPL27,BTF3,UBA52,RPS15A,RPS16,RPL13A,RPL3L,EEF2,RPS15,RPS3A,RPS5,RPS29,RPLP0,DDX3X,RPL6,RPS24,RPLP1,RPL8,RPL9,EIF2D,EIF3H,RPS27,FAU,RPS20,FXR2,RPL27A,RPL30,MRPL33,RPL7,RPL4,RPS9,AURKAIP1,RPL22,RPL37,RPL38,RPL10,RPL32,RPL35,MRPL11,NDUFAB1,MRPL16,MRPL2,MRPL23,MRPL34,MRPL35,RPL29,MRPL40,MRPL41,MRPL46,MRPL52,MRPL55,MRPS18B,MRPS33,RPL10A,NDUFA7,RPS25,RPL13,RPS28,RPL15,PP…
GO:CC	cytoplasmic part	GO:0044444	6.07082e-55	54.2168	9760	1172	866	18842	NDUFB10,AATK,ABCA1,ABCD3,EIF3K,ACAD11,ACADM,TPI1,ACADVL,COX5B,NDUFA4,ACOT1,ACOT13,ACSL1,ACTA1,ACTN2,ACTN3,ACTR1B,ACY3,ADAMTS1,EIF1,ADD3,ADRM1,ADSL,NECAB3,AGMAT,SYNPO,AHCYL1,AIFM1,AK1,AK8,COX6A2,NDUFB4,ALAS1,ALDH5A1,MDH2,ALG11,COX7C,AMPD1,AMT,ANAPC1,EIF4A2,ANKRD23,ANXA2,AP2S1,AP3S1,NDUFC2,APOC2,APOLD1,MRPS7,APOPT1,APP,ARAF,ARF5,ARHGAP29,ARHGEF6,ARL2,RPL21,COA3,ASB14,DHRS7C,ATAD3B,NDUFA8,ATG14,ATG2…
GO:CC	mitochondrion	GO:0005739	2.4797e-52	51.6056	1621	1172	270	18842	NDUFB10,ABCD3,ACAD11,ACADM,ACADVL,COX5B,NDUFA4,ACOT13,ACSL1,AGMAT,AIFM1,COX6A2,NDUFB4,ALAS1,ALDH5A1,MDH2,COX7C,AMT,NDUFC2,MRPS7,APOPT1,ARAF,ARL2,COA3,ATAD3B,NDUFA8,ATP2A1,NDUFV2,UQCRC1,COX4I1,ATP6,ATPAF1,AUH,BCKDK,BCS1L,BECN1,BLOC1S1,NDUFB11,UBA52,MAPK12,SLC25A3,CAPN2,CEP85,CHCHD3,CHCHD6,CISD1,CLPP,CMC2,COQ10A,COX17,COX3,VDAC1,COX6C,COX7A2,COX7A2L,CRAT,CRYAB,CS,CYC1,CYB5R1,NMNAT3,CYCS,TMEM143,DDI…
GO:CC	cytoplasm	GO:0005737	4.02583e-51	50.3951	11620	1172	959	18842	NDUFB10,AATK,ABCA1,ABCD3,EIF3K,ABI3,ACAD11,ACADM,TPI1,ACADVL,COX5B,NDUFA4,ACOT1,ACOT13,ACSL1,ACTA1,ACTN2,ACTN3,ACTR1B,ACY3,ADAMTS1,EIF1,ADD3,ADRM1,ADSL,AEBP1,NECAB3,AGMAT,SYNPO,AHCYL1,AIFM1,AK1,AK8,COX6A2,NDUFB4,ALAS1,ALDH5A1,MDH2,ALG11,COX7C,AMPD1,AMT,ANAPC1,TEX37,EIF4A2,ANKRD23,ANXA2,AP2S1,AP3S1,NDUFC2,APOC2,APOL3,APOLD1,MRPS7,APOPT1,APP,ARAF,ARF5,ARHGAP29,ARHGEF6,ARL2,RPL21,ARPP19,COA3,ASB14,D…
GO:CC	respirasome	GO:0070469	9.62109e-51	50.0168	101	1172	65	18842	NDUFB10,NDUFA4,COX6A2,NDUFB4,NDUFC2,COA3,NDUFA8,NDUFV2,UQCRC1,COX4I1,BCS1L,NDUFB11,COX3,COX7A2,COX7A2L,CYC1,CYCS,COX6B1,UQCRH,NDUFB7,UQCRFS1,NDUFB2,NDUFB9,UQCR11,NDUFB3,UQCR10,FOXRED1,UQCRQ,NDUFS3,NDUFA1,HIGD1A,HIGD2A,COX7B,NDUFAB1,NDUFS7,ND4,NDUFA10,UQCRB,NDUFA3,NDUFA5,NDUFA6,NDUFA7,NDUFB1,NDUFA2,NDUFC1,NDUFS1,NDUFS2,NDUFS4,NDUFS5,NDUFV1,NNT,UQCRC2,COX7A1,OXA1L,COX8A,COX5A,NDUFA9,NDUFS6,SDHB,NDU…
GO:CC	mitochondrial inner membrane	GO:0005743	6.65644e-50	49.1768	477	1172	134	18842	NDUFB10,ACAD11,ACADVL,COX5B,NDUFA4,AIFM1,COX6A2,NDUFB4,COX7C,NDUFC2,MRPS7,APOPT1,COA3,ATAD3B,NDUFA8,NDUFV2,UQCRC1,COX4I1,ATP6,BCS1L,NDUFB11,SLC25A3,CHCHD3,CHCHD6,COQ10A,COX3,COX6C,COX7A2,COX7A2L,CRAT,CYC1,CYCS,COX6B1,APOO,SLC25A4,UQCRH,NDUFB7,UQCRFS1,NDUFB2,ETFDH,NDUFB9,UQCR11,NDUFB3,UQCR10,FOXRED1,UQCRQ,GATM,GHITM,MRPL33,NDUFS3,NDUFA1,COQ9,HIGD1A,IMMP1L,AURKAIP1,ENDOG,SLC25A11,HCCS,HIGD2A,MRPL11…
GO:CC	mitochondrial envelope	GO:0005740	1.13646e-48	47.9444	753	1172	169	18842	NDUFB10,ACAD11,ACADM,ACADVL,COX5B,NDUFA4,ACSL1,AIFM1,COX6A2,NDUFB4,COX7C,NDUFC2,MRPS7,APOPT1,ARL2,COA3,ATAD3B,NDUFA8,NDUFV2,UQCRC1,COX4I1,ATP6,BCS1L,BECN1,BLOC1S1,NDUFB11,UBA52,SLC25A3,CAPN2,CHCHD3,CHCHD6,CISD1,COQ10A,COX17,COX3,VDAC1,COX6C,COX7A2,COX7A2L,CRAT,CYC1,CYCS,DDX3X,COX6B1,APOO,SLC25A4,UQCRH,NDUFB7,UQCRFS1,NDUFB2,ETFDH,NDUFB9,UQCR11,FAM210B,NDUFB3,FIS1,UQCR10,FOXRED1,UQCRQ,GATM,GHITM,MR…
GO:CC	mitochondrial membrane	GO:0031966	8.19619e-47	46.0864	710	1172	161	18842	NDUFB10,ACAD11,ACADM,ACADVL,COX5B,NDUFA4,ACSL1,AIFM1,COX6A2,NDUFB4,COX7C,NDUFC2,MRPS7,APOPT1,COA3,ATAD3B,NDUFA8,NDUFV2,UQCRC1,COX4I1,ATP6,BCS1L,BECN1,NDUFB11,UBA52,SLC25A3,CHCHD3,CHCHD6,CISD1,COQ10A,COX3,VDAC1,COX6C,COX7A2,COX7A2L,CRAT,CYC1,CYCS,DDX3X,COX6B1,APOO,SLC25A4,UQCRH,NDUFB7,UQCRFS1,NDUFB2,ETFDH,NDUFB9,UQCR11,FAM210B,NDUFB3,FIS1,UQCR10,FOXRED1,UQCRQ,GATM,GHITM,MRPL33,GNPAT,NDUFS3,NDUFA1,…
GO:CC	mitochondrial respirasome	GO:0005746	1.41251e-45	44.85	89	1172	58	18842	NDUFB10,NDUFA4,COX6A2,NDUFB4,NDUFC2,COA3,NDUFA8,NDUFV2,UQCRC1,COX4I1,BCS1L,NDUFB11,COX7A2,COX7A2L,CYC1,UQCRH,NDUFB7,UQCRFS1,NDUFB2,NDUFB9,NDUFB3,UQCR10,FOXRED1,UQCRQ,NDUFS3,NDUFA1,COX7B,NDUFAB1,NDUFS7,ND4,NDUFA10,UQCRB,NDUFA3,NDUFA5,NDUFA6,NDUFA7,NDUFB1,NDUFA2,NDUFC1,NDUFS1,NDUFS2,NDUFS4,NDUFS5,NDUFV1,NNT,UQCRC2,COX7A1,OXA1L,COX5A,NDUFA9,NDUFS6,SDHB,NDUFB6,SDHA,SDHC,SDHD,NDUFA13,WDR93
GO:CC	organelle inner membrane	GO:0019866	8.37509e-45	44.077	538	1172	136	18842	NDUFB10,ACAD11,ACADVL,COX5B,NDUFA4,AIFM1,COX6A2,NDUFB4,COX7C,NDUFC2,MRPS7,APOPT1,COA3,ATAD3B,NDUFA8,NDUFV2,UQCRC1,COX4I1,ATP6,BCS1L,NDUFB11,SLC25A3,CHCHD3,CHCHD6,COQ10A,COX3,COX6C,COX7A2,COX7A2L,CRAT,CYC1,CYCS,COX6B1,APOO,SLC25A4,UQCRH,NDUFB7,UQCRFS1,NDUFB2,ETFDH,NDUFB9,UQCR11,NDUFB3,UQCR10,FOXRED1,UQCRQ,GATM,GHITM,MRPL33,NDUFS3,NDUFA1,COQ9,HIGD1A,IMMP1L,AURKAIP1,ENDOG,SLC25A11,HCCS,LRPPRC,HIGD2A…
GO:CC	respiratory chain complex	GO:0098803	1.68749e-43	42.7728	87	1172	56	18842	NDUFB10,NDUFA4,COX6A2,NDUFB4,NDUFC2,COA3,NDUFA8,NDUFV2,UQCRC1,COX4I1,BCS1L,NDUFB11,COX3,CYC1,COX6B1,UQCRH,NDUFB7,UQCRFS1,NDUFB2,NDUFB9,NDUFB3,UQCR10,FOXRED1,UQCRQ,NDUFS3,NDUFA1,COX7B,NDUFAB1,NDUFS7,ND4,NDUFA10,UQCRB,NDUFA3,NDUFA5,NDUFA6,NDUFA7,NDUFB1,NDUFA2,NDUFC1,NDUFS1,NDUFS2,NDUFS4,NDUFS5,NDUFV1,UQCRC2,COX8A,COX5A,NDUFA9,NDUFS6,SDHB,NDUFB6,SDHA,SDHC,SDHD,NDUFA13,WDR93
GO:CC	cytosolic part	GO:0044445	3.6675e-41	40.4356	247	1172	88	18842	RPL21,RPS11,RPS4Y1,RPS14,RPL27,BAG6,BLOC1S1,UBA52,RPS15A,RPS16,PFKM,RPL13A,RPL3L,RPS15,RPS3A,RPS5,RPS29,RPLP0,DDX3X,RPL6,RPS24,RPLP1,RPL8,RPL9,EIF2D,RPS27,FAU,RPS20,FXR2,RPL27A,RPL30,RPL7,RPL4,HBD,HBG1,HSPA8,RPS9,ENO3,RPL22,RPL37,RPL38,RPL10,RPL32,RPL35,RPL29,RPL10A,RPS25,RPL13,RPS28,RPL15,PPARGC1A,PYDC1,RPL11,RPL12,RPS6,RPL14,RPL18A,RPL39,RPL23,RPL23A,RPS23,HBB,RPL3,RPL34,RPL35A,RPL36,RPL36A,RPL…
GO:CC	mitochondrial membrane part	GO:0044455	1.84785e-40	39.7333	234	1172	85	18842	NDUFB10,NDUFA4,COX6A2,NDUFB4,NDUFC2,APOPT1,COA3,NDUFA8,NDUFV2,UQCRC1,COX4I1,ATP6,BCS1L,NDUFB11,SLC25A3,CHCHD3,CHCHD6,CISD1,COX7A2,COX7A2L,CYC1,APOO,SLC25A4,UQCRH,NDUFB7,UQCRFS1,NDUFB2,ETFDH,NDUFB9,NDUFB3,FIS1,UQCR10,FOXRED1,UQCRQ,NDUFS3,NDUFA1,SAMM50,IMMP1L,COX7B,NDUFAB1,MFN2,MPC1,C14ORF2,NDUFS7,ND4,NDUFA10,UQCRB,NDUFA3,NDUFA5,NDUFA6,NDUFA7,NDUFAF5,NDUFB1,NDUFA2,NDUFC1,NDUFS1,NDUFS2,NDUFS4,NDUFS5…
GO:CC	cytosolic large ribosomal subunit	GO:0022625	5.01636e-40	39.2996	59	1172	45	18842	RPL21,RPL27,UBA52,RPL13A,RPL3L,RPLP0,RPL6,RPLP1,RPL8,RPL9,FXR2,RPL27A,RPL30,RPL7,RPL4,RPL22,RPL37,RPL38,RPL10,RPL32,RPL35,RPL29,RPL10A,RPL13,RPL15,RPL11,RPL12,RPL14,RPL18A,RPL39,RPL23,RPL23A,RPL3,RPL34,RPL35A,RPL36,RPL36A,RPL31,RPL37A,RPL41,RPL5,RPL7A,RPL24,RPLP2,RPL19
GO:CC	mitochondrial protein complex	GO:0098798	1.47536e-39	38.8311	269	1172	90	18842	NDUFB10,NDUFA4,COX6A2,NDUFB4,NDUFC2,MRPS7,COA3,NDUFA8,NDUFV2,UQCRC1,COX4I1,ATP6,BCKDK,BCS1L,NDUFB11,CHCHD3,CHCHD6,VDAC1,CYC1,APOO,DLAT,UQCRH,NDUFB7,UQCRFS1,NDUFB2,NDUFB9,NDUFB3,UQCR10,FOXRED1,UQCRQ,MRPL33,NDUFS3,NDUFA1,HSD17B10,SAMM50,IMMP1L,MRPL11,NDUFAB1,MRPL16,MRPL2,MRPL23,C14ORF2,MRPL34,MRPL35,MRPL40,MRPL41,MRPL46,MRPL52,MRPL55,MRPS18B,MRPS33,NDUFS7,ND4,NDUFA10,UQCRB,NDUFA3,NDUFA5,NDUFA6,NDUF…
GO:CC	inner mitochondrial membrane protein complex	GO:0098800	6.39591e-39	38.1941	138	1172	65	18842	NDUFB10,NDUFA4,COX6A2,NDUFB4,NDUFC2,COA3,NDUFA8,NDUFV2,UQCRC1,COX4I1,ATP6,BCS1L,NDUFB11,CHCHD3,CHCHD6,CYC1,APOO,UQCRH,NDUFB7,UQCRFS1,NDUFB2,NDUFB9,NDUFB3,UQCR10,FOXRED1,UQCRQ,NDUFS3,NDUFA1,IMMP1L,NDUFAB1,C14ORF2,NDUFS7,ND4,NDUFA10,UQCRB,NDUFA3,NDUFA5,NDUFA6,NDUFA7,NDUFB1,NDUFA2,NDUFC1,NDUFS1,NDUFS2,NDUFS4,NDUFS5,NDUFV1,UQCRC2,PAM16,ATP5J,PPIF,ROMO1,ATP5G1,COX5A,NDUFA9,NDUFS6,SDHB,NDUFB6,SDHA,SDHC…
GO:CC	oxidoreductase complex	GO:1990204	1.24148e-37	36.9061	116	1172	59	18842	NDUFB10,NDUFA4,NDUFB4,NDUFC2,NDUFA8,NDUFV2,UQCRC1,BCKDK,BCS1L,NDUFB11,CYC1,DLAT,DLST,UQCRH,NDUFB7,UQCRFS1,NDUFB2,NDUFB9,NDUFB3,UQCR10,FOXRED1,UQCRQ,GCSH,GPD1,GPD1L,NDUFS3,NDUFA1,NDUFAB1,NDUFS7,ND4,NDUFA10,UQCRB,NDUFA3,NDUFA5,NDUFA6,NDUFA7,NDUFB1,NDUFA2,NDUFC1,NDUFS1,NDUFS2,NDUFS4,NDUFS5,NDUFV1,NOXA1,UQCRC2,OGDH,PDHA1,PDHB,PDK2,NDUFA9,NDUFS6,SDHB,NDUFB6,SDHA,SDHC,SDHD,NDUFA13,WDR93
GO:CC	large ribosomal subunit	GO:0015934	8.29366e-37	36.0813	119	1172	59	18842	RPL21,RPL27,UBA52,RPL13A,RPL3L,RPLP0,RPL6,RPLP1,RPL8,RPL9,FXR2,RPL27A,RPL30,MRPL33,RPL7,RPL4,RPL22,RPL37,RPL38,RPL10,RPL32,RPL35,MRPL11,NDUFAB1,MRPL16,MRPL2,MRPL23,MRPL34,MRPL35,RPL29,MRPL40,MRPL41,MRPL46,MRPL52,MRPL55,RPL10A,RPL13,RPL15,RPL11,RPL12,RPL14,RPL18A,RPL39,RPL23,RPL23A,RPL3,RPL34,RPL35A,RPL36,RPL36A,RPL31,RPL37A,RPL41,RPL5,RPL7A,RPL24,RPLP2,MRPL4,RPL19
GO:CC	organelle envelope	GO:0031967	5.76333e-34	33.2393	1202	1172	194	18842	NDUFB10,ACAD11,ACADM,ACADVL,COX5B,NDUFA4,ACSL1,AIFM1,COX6A2,NDUFB4,COX7C,NDUFC2,MRPS7,APOPT1,APP,ARL2,COA3,ATAD3B,NDUFA8,NDUFV2,UQCRC1,COX4I1,ATP6,ATRAID,BANF1,BCS1L,BECN1,BLOC1S1,NDUFB11,UBA52,YBX1,SLC25A3,CAPN2,CCDC155,CHCHD3,CHCHD6,CISD1,COQ10A,COX17,COX3,VDAC1,COX6C,COX7A2,COX7A2L,MGST3,CPTP,CRAT,CYC1,CUEDC2,CYCS,DDX3X,COX6B1,APOO,SLC25A4,UQCRH,NDUFB7,UQCRFS1,NDUFB2,EIF5A,BIN1,ETFDH,NDUFB9,UQ…
GO:CC	envelope	GO:0031975	5.76333e-34	33.2393	1202	1172	194	18842	NDUFB10,ACAD11,ACADM,ACADVL,COX5B,NDUFA4,ACSL1,AIFM1,COX6A2,NDUFB4,COX7C,NDUFC2,MRPS7,APOPT1,APP,ARL2,COA3,ATAD3B,NDUFA8,NDUFV2,UQCRC1,COX4I1,ATP6,ATRAID,BANF1,BCS1L,BECN1,BLOC1S1,NDUFB11,UBA52,YBX1,SLC25A3,CAPN2,CCDC155,CHCHD3,CHCHD6,CISD1,COQ10A,COX17,COX3,VDAC1,COX6C,COX7A2,COX7A2L,MGST3,CPTP,CRAT,CYC1,CUEDC2,CYCS,DDX3X,COX6B1,APOO,SLC25A4,UQCRH,NDUFB7,UQCRFS1,NDUFB2,EIF5A,BIN1,ETFDH,NDUFB9,UQ…
GO:CC	contractile fiber	GO:0043292	9.25733e-34	33.0335	235	1172	78	18842	ACTA1,ACTN2,ACTN3,SYNPO,ANKRD23,PARVB,CACNA1S,MYOZ1,CRYAB,CSRP3,CAPN3,TMOD4,DES,BIN1,TPM2,FBXO32,FHOD3,FKBP1A,HRC,FHL3,IGFN1,ITGB1BP2,JPH1,SVIL,LMOD1,LMOD2,MYH1,MYH4,MYH6,MYH7,MYH7B,MYL1,MYL12A,MYL2,MYL3,MYLK2,MYLPF,MYOZ3,MYPN,PPP3CB,MYOT,PRICKLE4,NOS1,TRIM54,PDE4B,PDLIM1,PDLIM3,PDLIM7,PECAM1,KLHL41,PLEC,PPP1R12B,MYOM1,ANK1,TPM1,CMYA5,CASQ1,RYR1,S100A1,SMPX,FBP2,PDE4DIP,SQSTM1,MYH2,SYNPO2L,TCAP,T…
GO:CC	myofibril	GO:0030016	2.68388e-33	32.5712	226	1172	76	18842	ACTA1,ACTN2,ACTN3,SYNPO,ANKRD23,PARVB,CACNA1S,MYOZ1,CRYAB,CSRP3,CAPN3,TMOD4,DES,BIN1,TPM2,FBXO32,FHOD3,FKBP1A,HRC,FHL3,IGFN1,ITGB1BP2,JPH1,SVIL,LMOD1,LMOD2,MYH1,MYH4,MYH6,MYH7,MYH7B,MYL1,MYL12A,MYL2,MYL3,MYLK2,MYOZ3,MYPN,PPP3CB,MYOT,PRICKLE4,NOS1,TRIM54,PDE4B,PDLIM1,PDLIM3,PDLIM7,KLHL41,PLEC,PPP1R12B,MYOM1,ANK1,TPM1,CMYA5,CASQ1,RYR1,S100A1,SMPX,FBP2,PDE4DIP,SQSTM1,MYH2,SYNPO2L,TCAP,TNNC1,TNNC2,TN…
GO:CC	contractile fiber part	GO:0044449	2.4805e-31	30.6055	221	1172	73	18842	ACTA1,ACTN2,ACTN3,SYNPO,PARVB,CACNA1S,MYOZ1,CRYAB,CSRP3,CAPN3,TMOD4,DES,BIN1,TPM2,FBXO32,FHOD3,FKBP1A,HRC,FHL3,IGFN1,ITGB1BP2,JPH1,SVIL,LMOD1,LMOD2,MYH1,MYH4,MYH6,MYH7,MYL1,MYL12A,MYL2,MYL3,MYLK2,MYLPF,MYOZ3,MYPN,PPP3CB,MYOT,PRICKLE4,NOS1,TRIM54,PDE4B,PDLIM1,PDLIM3,PDLIM7,PECAM1,KLHL41,PLEC,PPP1R12B,MYOM1,ANK1,TPM1,CMYA5,CASQ1,RYR1,S100A1,SMPX,FBP2,SQSTM1,MYH2,SYNPO2L,TCAP,TNNC1,TNNC2,TNNI1,TNNI2…
GO:CC	sarcomere	GO:0030017	2.90827e-30	29.5364	204	1172	69	18842	ACTA1,ACTN2,ACTN3,SYNPO,PARVB,CACNA1S,MYOZ1,CRYAB,CSRP3,CAPN3,TMOD4,DES,BIN1,TPM2,FBXO32,FHOD3,FKBP1A,HRC,FHL3,IGFN1,ITGB1BP2,JPH1,LMOD1,LMOD2,MYH1,MYH4,MYH6,MYH7,MYL1,MYL12A,MYL2,MYL3,MYLK2,MYOZ3,MYPN,PPP3CB,MYOT,PRICKLE4,NOS1,TRIM54,PDE4B,PDLIM1,PDLIM3,PDLIM7,KLHL41,PPP1R12B,MYOM1,ANK1,TPM1,CMYA5,CASQ1,RYR1,S100A1,SMPX,FBP2,SQSTM1,MYH2,SYNPO2L,TCAP,TNNC1,TNNC2,TNNI1,TNNI2,TNNT1,TNNT3,NEB,TPM3,T…
GO:CC	cytosolic small ribosomal subunit	GO:0022627	1.2057e-29	28.9188	45	1172	34	18842	RPS11,RPS4Y1,RPS14,UBA52,RPS15A,RPS16,RPS15,RPS3A,RPS5,RPS29,DDX3X,RPS24,EIF2D,RPS27,FAU,RPS20,RPS9,RPS25,RPS28,RPS6,RPS23,RPS17,RPS18,RPS19,RPS2,RPS21,RPS27A,RPS3,RPS4X,RPS7,RPS8,RPSA,RPS10,RPS12
GO:CC	ribonucleoprotein complex	GO:1990904	8.61325e-29	28.0648	878	1172	151	18842	EIF3K,EIF1,MRPS7,RPL21,RPS11,RPS4Y1,RPS14,RPL27,BTBD1,BTF3,UBA52,YBX1,RPS15A,RPS16,RPL13A,RPL3L,EEF2,RPS15,RPS3A,RPS5,RPS29,RPLP0,DDX3X,RPL6,RPS24,EIF3F,RPLP1,RPL8,DYRK2,RPL9,EID1,EIF1B,EIF2D,EIF3E,EIF3H,SNRNP25,EIF4G1,EIF3L,EPRS,RPS27,FAU,FBL,FBLL1,FBXW9,RPS20,FXR2,RPL27A,TXNL4A,GAPDH,RPL30,MRPL33,GRSF1,RPL7,RPL4,HNRNPA1,HSD17B10,HSPA1A,HSPA8,IMP4,IQGAP1,RPS9,AURKAIP1,RPL22,RPL37,RPL38,RPL10,RPL…
GO:CC	intracellular part	GO:0044424	2.48322e-28	27.605	14552	1172	1053	18842	NDUFB10,AATK,ABCA1,ABCA8,ABCD3,EIF3K,ABI3,ACAD11,ACADM,TPI1,ACADVL,COX5B,NDUFA4,ACOT1,ACOT13,ACSL1,ACTA1,ACTN2,ACTN3,ACTR1B,ACY3,ADAMTS1,EIF1,ADD3,ADRM1,ADSL,LMO1,AEBP1,NECAB3,AGMAT,SYNPO,AHCYL1,AIFM1,AK1,AK8,COX6A2,NDUFB4,ALAS1,ALDH5A1,MDH2,ALG11,SP8,COX7C,AMPD1,AMT,ANAPC1,ANAPC13,TEX37,EIF4A2,ANKRD23,ANXA2,AP2S1,AP3S1,NDUFC2,APOC2,APOL3,APOLD1,MRPS7,APOPT1,APP,ARAF,ARF5,ARHGAP29,ARHGEF6,ARID5B,…
GO:CC	intracellular	GO:0005622	2.62721e-28	27.5805	14596	1172	1055	18842	NDUFB10,AATK,ABCA1,ABCA8,ABCD3,EIF3K,ABI3,ACAD11,ACADM,TPI1,ACADVL,COX5B,NDUFA4,ACOT1,ACOT13,ACSL1,ACTA1,ACTN2,ACTN3,ACTR1B,ACY3,ADAMTS1,EIF1,ADD3,ADRM1,ADSL,LMO1,AEBP1,NECAB3,AGMAT,SYNPO,AHCYL1,AIFM1,AK1,AK8,COX6A2,NDUFB4,ALAS1,ALDH5A1,MDH2,ALG11,SP8,COX7C,AMPD1,AMT,ANAPC1,ANAPC13,TEX37,EIF4A2,ANKRD23,ANXA2,AP2S1,AP3S1,NDUFC2,APOC2,APOL3,APOLD1,MRPS7,APOPT1,APP,ARAF,ARF5,ARHGAP29,ARHGEF6,ARID5B,…
GO:CC	mitochondrial respiratory chain complex I	GO:0005747	1.09659e-27	26.96	52	1172	35	18842	NDUFB10,NDUFA4,NDUFB4,NDUFC2,NDUFA8,NDUFV2,NDUFB11,NDUFB7,NDUFB2,NDUFB9,NDUFB3,FOXRED1,NDUFS3,NDUFA1,NDUFAB1,NDUFS7,ND4,NDUFA10,NDUFA3,NDUFA5,NDUFA6,NDUFA7,NDUFB1,NDUFA2,NDUFC1,NDUFS1,NDUFS2,NDUFS4,NDUFS5,NDUFV1,NDUFA9,NDUFS6,NDUFB6,NDUFA13,WDR93
GO:CC	NADH dehydrogenase complex	GO:0030964	1.09659e-27	26.96	52	1172	35	18842	NDUFB10,NDUFA4,NDUFB4,NDUFC2,NDUFA8,NDUFV2,NDUFB11,NDUFB7,NDUFB2,NDUFB9,NDUFB3,FOXRED1,NDUFS3,NDUFA1,NDUFAB1,NDUFS7,ND4,NDUFA10,NDUFA3,NDUFA5,NDUFA6,NDUFA7,NDUFB1,NDUFA2,NDUFC1,NDUFS1,NDUFS2,NDUFS4,NDUFS5,NDUFV1,NDUFA9,NDUFS6,NDUFB6,NDUFA13,WDR93
GO:CC	respiratory chain complex I	GO:0045271	1.09659e-27	26.96	52	1172	35	18842	NDUFB10,NDUFA4,NDUFB4,NDUFC2,NDUFA8,NDUFV2,NDUFB11,NDUFB7,NDUFB2,NDUFB9,NDUFB3,FOXRED1,NDUFS3,NDUFA1,NDUFAB1,NDUFS7,ND4,NDUFA10,NDUFA3,NDUFA5,NDUFA6,NDUFA7,NDUFB1,NDUFA2,NDUFC1,NDUFS1,NDUFS2,NDUFS4,NDUFS5,NDUFV1,NDUFA9,NDUFS6,NDUFB6,NDUFA13,WDR93
GO:CC	cytosol	GO:0005829	3.77183e-25	24.4234	5086	1172	483	18842	ABCD3,EIF3K,TPI1,ACADVL,ACOT1,ACOT13,ACTA1,ACTN2,ACTN3,ACTR1B,ACY3,ADD3,ADRM1,ADSL,AHCYL1,AIFM1,AK1,AK8,ALAS1,AMPD1,ANAPC1,EIF4A2,ANKRD23,ANXA2,AP2S1,APOLD1,APP,ARAF,ARHGAP29,ARHGEF6,ARL2,RPL21,ASB14,ATG14,ATG2A,RPS11,RPS4Y1,UQCRC1,PGAM2,RPS14,RPL27,ATP6V1G1,PPP1R3C,BAG1,BAG6,BANF1,BECN1,PARVB,BIRC2,BLOC1S1,BLVRB,BTBD1,YBX3,BTF3,UBA52,EEF1D,MAPK12,YBX1,CA2,CA3,CALCOCO2,CAMK2B,CAPN2,CARM1,CARNS1,A…
GO:CC	small ribosomal subunit	GO:0015935	9.48826e-23	22.0228	74	1172	37	18842	MRPS7,RPS11,RPS4Y1,RPS14,UBA52,RPS15A,RPS16,RPS15,RPS3A,RPS5,RPS29,DDX3X,RPS24,EIF2D,RPS27,FAU,RPS20,RPS9,MRPS18B,MRPS33,RPS25,RPS28,RPS6,RPS23,RPS17,RPS18,RPS19,RPS2,RPS21,RPS27A,RPS3,RPS4X,RPS7,RPS8,RPSA,RPS10,RPS12
GO:CC	organelle part	GO:0044422	3.19128e-22	21.496	10009	1172	790	18842	NDUFB10,ABCA1,ABCD3,ACAD11,ACADM,ACADVL,COX5B,NDUFA4,ACOT13,ACSL1,ACTA1,ACTN2,ACTN3,ACTR1B,ADD3,ADRM1,LMO1,NECAB3,SYNPO,AHCYL1,AIFM1,AK1,AK8,COX6A2,NDUFB4,ALAS1,ALDH5A1,MDH2,ALG11,SP8,COX7C,AMT,ANAPC1,ANAPC13,ANKRD23,ANXA2,AP2S1,AP3S1,NDUFC2,APOLD1,MRPS7,APOPT1,APP,ARID5B,ARL2,RPL21,ARPP19,ARX,COA3,DHRS7C,ASH2L,ATAD3B,NDUFA8,ATG14,ATP2A1,RPS11,NDUFV2,RPS4Y1,UQCRC1,RPS14,RPL27,COX4I1,ATP6,ATP6V1G1…
GO:CC	organelle	GO:0043226	5.37382e-21	20.2697	13667	1172	990	18842	NDUFB10,ABCA1,ABCA8,ABCD3,EIF3K,ACAD11,ACADM,TPI1,ACADVL,COX5B,NDUFA4,ACOT13,ACSL1,ACTA1,ACTN2,ACTN3,ACTR1B,ACY3,ADAMTS1,EIF1,ADD3,ADRM1,LMO1,AEBP1,NECAB3,AGMAT,SYNPO,AHCYL1,AIFM1,AK1,AK8,COX6A2,NDUFB4,ALAS1,ALDH5A1,MDH2,ALG11,SP8,COX7C,AMT,ANAPC1,ANAPC13,ANGPTL2,TEX37,ANKRD23,ANXA2,AP2S1,AP3S1,NDUFC2,APOC2,APOLD1,MRPS7,APOPT1,APP,ARAF,ARF5,ARID5B,ARL2,RPL21,ARPP19,ARX,COA3,DHRS7C,ASH2L,ATAD3B,ND…
GO:CC	intracellular organelle	GO:0043229	5.94421e-21	20.2259	12818	1172	945	18842	NDUFB10,ABCA1,ABCA8,ABCD3,EIF3K,ACAD11,ACADM,TPI1,ACADVL,COX5B,NDUFA4,ACOT13,ACSL1,ACTA1,ACTN2,ACTN3,ACTR1B,ADAMTS1,EIF1,ADD3,ADRM1,LMO1,AEBP1,NECAB3,AGMAT,SYNPO,AHCYL1,AIFM1,AK1,AK8,COX6A2,NDUFB4,ALAS1,ALDH5A1,MDH2,ALG11,SP8,COX7C,AMT,ANAPC1,ANAPC13,TEX37,ANKRD23,ANXA2,AP2S1,AP3S1,NDUFC2,APOC2,APOLD1,MRPS7,APOPT1,APP,ARAF,ARF5,ARID5B,ARL2,RPL21,ARPP19,ARX,COA3,DHRS7C,ASH2L,ATAD3B,NDUFA8,ATG14,AT…
GO:CC	mitochondrial matrix	GO:0005759	2.09754e-20	19.6783	475	1172	92	18842	ACADM,ACADVL,ALAS1,ALDH5A1,MDH2,AMT,MRPS7,ARL2,AUH,BCKDK,BLOC1S1,CLPP,VDAC1,CS,NMNAT3,DECR1,DLAT,DLST,DNAJA3,ECHS1,IDH2,ETFB,ETFDH,FH,GCSH,GLRX5,MRPL33,GPT2,NDUFS3,GRSF1,GSTK1,HADH,HAGH,HIBADH,HSD17B10,HSPE1,ISCA1,ISCU,LRPPRC,MRPL11,ACADS,NDUFAB1,MLYCD,MPST,MRPL16,MRPL2,MRPL23,MRPL34,MRPL35,MRPL40,MRPL41,MRPL46,MRPL52,MRPL55,MRPS18B,MRPS33,MRRF,MTHFS,NDUFS7,NDUFA10,NDUFA7,TXN2,NDUFS1,NDUFS2,FASTK…
GO:CC	intracellular organelle part	GO:0044446	2.06298e-19	18.6855	9699	1172	761	18842	NDUFB10,ABCA1,ABCD3,ACAD11,ACADM,ACADVL,COX5B,NDUFA4,ACOT13,ACSL1,ACTA1,ACTN2,ACTN3,ACTR1B,ADD3,ADRM1,LMO1,NECAB3,SYNPO,AHCYL1,AIFM1,AK1,AK8,COX6A2,NDUFB4,ALAS1,ALDH5A1,MDH2,ALG11,SP8,COX7C,AMT,ANAPC1,ANAPC13,ANKRD23,ANXA2,AP2S1,AP3S1,NDUFC2,APOLD1,MRPS7,APOPT1,APP,ARID5B,ARL2,RPL21,ARPP19,ARX,COA3,DHRS7C,ASH2L,ATAD3B,NDUFA8,ATG14,ATP2A1,RPS11,NDUFV2,RPS4Y1,UQCRC1,RPS14,RPL27,COX4I1,ATP6,ATP6V1G1…
GO:CC	I band	GO:0031674	7.83335e-19	18.1061	142	1172	46	18842	ACTN2,ACTN3,SYNPO,PARVB,CACNA1S,MYOZ1,CRYAB,CSRP3,CAPN3,DES,BIN1,FBXO32,FHOD3,FKBP1A,HRC,FHL3,IGFN1,ITGB1BP2,JPH1,MYH6,MYH7,MYL12A,MYL3,MYOZ3,MYPN,PPP3CB,MYOT,PRICKLE4,NOS1,TRIM54,PDE4B,PDLIM1,PDLIM3,PDLIM7,PPP1R12B,MYOM1,ANK1,CASQ1,RYR1,S100A1,FBP2,SYNPO2L,TCAP,NEB,TTN,XIRP2
GO:CC	Z disc	GO:0030018	8.08325e-19	18.0924	130	1172	44	18842	ACTN2,ACTN3,SYNPO,PARVB,MYOZ1,CRYAB,CSRP3,CAPN3,DES,BIN1,FBXO32,FHOD3,FKBP1A,HRC,FHL3,IGFN1,ITGB1BP2,JPH1,MYH6,MYH7,MYL12A,MYOZ3,MYPN,PPP3CB,MYOT,PRICKLE4,NOS1,TRIM54,PDE4B,PDLIM1,PDLIM3,PDLIM7,PPP1R12B,MYOM1,ANK1,CASQ1,RYR1,S100A1,FBP2,SYNPO2L,TCAP,NEB,TTN,XIRP2
GO:CC	polysomal ribosome	GO:0042788	8.97559e-19	18.0469	32	1172	23	18842	BTF3,EEF2,RPS29,RPL6,RPL8,EIF3H,RPL30,RPL38,RPL32,RPL10A,RPS28,RPL11,RPL18A,RPL39,RPS23,RPL36,RPL36A,RPL31,RPL41,RPL7A,RPL24,RPS21,RPL19
GO:CC	extracellular vesicle	GO:1903561	6.04919e-18	17.2183	2166	1172	241	18842	TPI1,ACTA1,ACTN2,ACTN3,ACTR1B,ACY3,AEBP1,AHCYL1,AK1,MDH2,ANGPTL2,ANXA2,APP,ARF5,ATP1A2,RPS11,PGAM2,RPS14,RPL27,ATP6V1G1,AZGP1,BAG6,BLVRB,BPIFA2,UBA52,YBX1,CA2,SLC25A3,CAPN2,RPS15A,CFH,CHCHD3,RPS16,CLIC5,CMBL,CNKSR2,EEF2,VDAC1,RPS3A,CPNE9,CPE,CREB5,CRTC2,CRYAB,CS,RPS5,CYB5R1,CYFIP1,RPS29,DAAM2,DBI,RPLP0,DCXR,DDX3X,DES,PGM1,EEF1G,EEF1A1,EGF,EIF3E,EIF3H,IDH2,EPS8,FABP3,PRDX2,FBL,FBLN5,RPS20,FH,WNT7B…
GO:CC	extracellular exosome	GO:0070062	6.74693e-18	17.1709	2143	1172	239	18842	TPI1,ACTA1,ACTN2,ACTN3,ACTR1B,ACY3,AEBP1,AHCYL1,AK1,MDH2,ANGPTL2,ANXA2,APP,ARF5,RPS11,PGAM2,RPS14,RPL27,ATP6V1G1,AZGP1,BAG6,BLVRB,BPIFA2,UBA52,YBX1,CA2,SLC25A3,CAPN2,RPS15A,CFH,CHCHD3,RPS16,CLIC5,CMBL,CNKSR2,EEF2,VDAC1,RPS3A,CPNE9,CPE,CREB5,CRTC2,CRYAB,CS,RPS5,CYB5R1,CYFIP1,RPS29,DAAM2,DBI,RPLP0,DCXR,DDX3X,DES,PGM1,EEF1G,EEF1A1,EGF,EIF3E,EIF3H,IDH2,EPS8,FABP3,PRDX2,FBL,FBLN5,RPS20,FH,WNT7B,FKBP5,…
GO:CC	extracellular organelle	GO:0043230	8.19981e-18	17.0862	2171	1172	241	18842	TPI1,ACTA1,ACTN2,ACTN3,ACTR1B,ACY3,AEBP1,AHCYL1,AK1,MDH2,ANGPTL2,ANXA2,APP,ARF5,ATP1A2,RPS11,PGAM2,RPS14,RPL27,ATP6V1G1,AZGP1,BAG6,BLVRB,BPIFA2,UBA52,YBX1,CA2,SLC25A3,CAPN2,RPS15A,CFH,CHCHD3,RPS16,CLIC5,CMBL,CNKSR2,EEF2,VDAC1,RPS3A,CPNE9,CPE,CREB5,CRTC2,CRYAB,CS,RPS5,CYB5R1,CYFIP1,RPS29,DAAM2,DBI,RPLP0,DCXR,DDX3X,DES,PGM1,EEF1G,EEF1A1,EGF,EIF3E,EIF3H,IDH2,EPS8,FABP3,PRDX2,FBL,FBLN5,RPS20,FH,WNT7B…
GO:CC	polysome	GO:0005844	3.5371e-15	14.4514	73	1172	30	18842	RPS4Y1,BTF3,EEF2,RPS29,RPL6,RPL8,EIF3H,EIF4G1,FXR2,RPL30,RPL38,RPL32,RPL10A,RPS28,RPL11,RPS6,RPL18A,RPL39,RPS23,RPL36,RPL36A,RPL31,RPL41,RPL7A,RPL24,RPS21,RPS3,RPS4X,RWDD1,RPL19
GO:CC	protein-containing complex	GO:0032991	8.28988e-14	13.0815	5641	1172	478	18842	NDUFB10,EIF3K,NDUFA4,ACTR1B,EIF1,ADRM1,COX6A2,NDUFB4,AMIGO1,ANAPC1,ANAPC13,EIF4A2,ANXA2,AP2S1,AP3S1,NDUFC2,APOC2,MRPS7,APP,ARHGAP29,RPL21,COA3,ASH2L,NDUFA8,ATG14,ATP1A2,ATP2A1,RPS11,NDUFV2,RPS4Y1,UQCRC1,RPS14,RPL27,COX4I1,ATP6,ATP6AP1L,ATP6V1G1,BAG6,BCKDK,BCS1L,BECN1,BEX1,BIRC2,BLOC1S1,NDUFB11,BTBD1,BTF3,UBA52,EEF1D,YBX1,CACNA1S,CACNG6,CAMK2B,CARM1,CCDC155,CCNB3,CDH24,RPS15A,CHCHD3,CHCHD6,RPS16,C…
GO:CC	intracellular membrane-bounded organelle	GO:0043231	2.97625e-13	12.5263	11036	1172	815	18842	NDUFB10,ABCA1,ABCA8,ABCD3,EIF3K,ACAD11,ACADM,TPI1,ACADVL,COX5B,NDUFA4,ACOT13,ACSL1,EIF1,ADD3,ADRM1,LMO1,AEBP1,NECAB3,AGMAT,SYNPO,AHCYL1,AIFM1,COX6A2,NDUFB4,ALAS1,ALDH5A1,MDH2,ALG11,SP8,COX7C,AMT,ANAPC1,ANAPC13,TEX37,ANKRD23,ANXA2,AP2S1,AP3S1,NDUFC2,APOLD1,MRPS7,APOPT1,APP,ARAF,ARF5,ARID5B,ARL2,RPL21,ARPP19,ARX,COA3,DHRS7C,ASH2L,ATAD3B,NDUFA8,ATG14,ATG2A,ATP2A1,RPS11,NDUFV2,RPS4Y1,UQCRC1,PGAM2,RPS…
GO:CC	membrane-bounded organelle	GO:0043227	1.06983e-12	11.9707	12536	1172	899	18842	NDUFB10,ABCA1,ABCA8,ABCD3,EIF3K,ACAD11,ACADM,TPI1,ACADVL,COX5B,NDUFA4,ACOT13,ACSL1,ACTA1,ACTN2,ACTN3,ACTR1B,ACY3,ADAMTS1,EIF1,ADD3,ADRM1,LMO1,AEBP1,NECAB3,AGMAT,SYNPO,AHCYL1,AIFM1,AK1,COX6A2,NDUFB4,ALAS1,ALDH5A1,MDH2,ALG11,SP8,COX7C,AMT,ANAPC1,ANAPC13,ANGPTL2,TEX37,ANKRD23,ANXA2,AP2S1,AP3S1,NDUFC2,APOC2,APOLD1,MRPS7,APOPT1,APP,ARAF,ARF5,ARID5B,ARL2,RPL21,ARPP19,ARX,COA3,DHRS7C,ASH2L,ATAD3B,NDUFA8…
GO:CC	striated muscle thin filament	GO:0005865	2.03479e-11	10.6915	25	1172	16	18842	ACTA1,TMOD4,TPM2,FHOD3,LMOD1,LMOD2,MYOM1,TPM1,TNNC1,TNNC2,TNNI1,TNNI2,TNNT1,TNNT3,TPM3,TTN
GO:CC	cell-substrate adherens junction	GO:0005924	2.11028e-11	10.6757	406	1172	68	18842	ACTN2,ACTN3,ARL2,RPS11,RPS14,RPL27,PARVB,CAPN2,RPS16,RPL13A,RPS15,RPS3A,RPS5,CYFIP1,RPS29,RPLP0,RPL6,RPLP1,RPL8,RPL9,FHL1,FLII,FLRT2,RPL30,RPL7,RPL4,HSPA1A,HSPA8,FHL3,IQGAP1,ITGA6,RPS9,RPL22,SVIL,RPL38,MAP2K2,MPRIP,RPL10A,PACSIN2,PDLIM1,PDLIM7,PLEC,PPP1CB,PPP1CC,PRKAR2A,RHOB,RPL12,RPL23,RPL3,RPL31,RPL37A,RPL5,RPL7A,RPLP2,RPS17,RPS18,RPS19,RPS2,RPS3,RPS4X,RPS7,RPS8,SMPX,SORBS1,RPS10,RPL19,XIRP2,YW…
GO:CC	cytochrome complex	GO:0070069	2.71172e-11	10.5668	33	1172	18	18842	NDUFA4,COX6A2,COA3,UQCRC1,COX4I1,BCS1L,COX3,CYC1,COX6B1,UQCRH,UQCRFS1,UQCR10,UQCRQ,COX7B,UQCRB,UQCRC2,COX8A,COX5A
GO:CC	cell-substrate junction	GO:0030055	3.8726e-11	10.412	411	1172	68	18842	ACTN2,ACTN3,ARL2,RPS11,RPS14,RPL27,PARVB,CAPN2,RPS16,RPL13A,RPS15,RPS3A,RPS5,CYFIP1,RPS29,RPLP0,RPL6,RPLP1,RPL8,RPL9,FHL1,FLII,FLRT2,RPL30,RPL7,RPL4,HSPA1A,HSPA8,FHL3,IQGAP1,ITGA6,RPS9,RPL22,SVIL,RPL38,MAP2K2,MPRIP,RPL10A,PACSIN2,PDLIM1,PDLIM7,PLEC,PPP1CB,PPP1CC,PRKAR2A,RHOB,RPL12,RPL23,RPL3,RPL31,RPL37A,RPL5,RPL7A,RPLP2,RPS17,RPS18,RPS19,RPS2,RPS3,RPS4X,RPS7,RPS8,SMPX,SORBS1,RPS10,RPL19,XIRP2,YW…
GO:CC	focal adhesion	GO:0005925	4.66502e-11	10.3311	403	1172	67	18842	ACTN2,ACTN3,ARL2,RPS11,RPS14,RPL27,PARVB,CAPN2,RPS16,RPL13A,RPS15,RPS3A,RPS5,CYFIP1,RPS29,RPLP0,RPL6,RPLP1,RPL8,RPL9,FHL1,FLII,FLRT2,RPL30,RPL7,RPL4,HSPA1A,HSPA8,FHL3,IQGAP1,ITGA6,RPS9,RPL22,SVIL,RPL38,MAP2K2,MPRIP,RPL10A,PACSIN2,PDLIM1,PDLIM7,PLEC,PPP1CB,PPP1CC,PRKAR2A,RHOB,RPL12,RPL23,RPL3,RPL31,RPL37A,RPL5,RPL7A,RPLP2,RPS17,RPS18,RPS19,RPS2,RPS3,RPS4X,RPS7,RPS8,SORBS1,RPS10,RPL19,XIRP2,YWHAQ
GO:CC	myofilament	GO:0036379	1.15303e-10	9.93816	27	1172	16	18842	ACTA1,TMOD4,TPM2,FHOD3,LMOD1,LMOD2,MYOM1,TPM1,TNNC1,TNNC2,TNNI1,TNNI2,TNNT1,TNNT3,TPM3,TTN
GO:CC	actin cytoskeleton	GO:0015629	2.52289e-10	9.5981	517	1172	77	18842	ACTA1,ACTN2,ACTN3,ACTR1B,SYNPO,ANKRD23,PARVB,CAPN2,MYOZ1,CLIC5,CRYAB,TMOD4,DCTN3,PGM1,DNAJA3,EEF1A1,BIN1,TPM2,FHOD1,FHOD3,GABARAP,HSPB7,FHL3,IQGAP1,KEAP1,KLHL17,SVIL,LMOD1,LMOD2,CAP2,LURAP1,MPRIP,MYBPC2,MYH1,MYH14,MYH4,MYH6,MYH7,MYH7B,MYL1,MYL12A,MYL12B,MYL2,MYL3,MYLPF,MYOZ3,MYOT,PRICKLE4,PDLIM1,PDLIM3,PDLIM7,PLS3,DCDC2B,RCSD1,RHOQ,MYOM1,TPM1,SMTN,HAX1,SH2B2,SORBS1,OPHN1,MYH2,SYNPO2L,TMEM63B,TNNC…
GO:CC	sarcoplasm	GO:0016528	2.64429e-10	9.57769	79	1172	26	18842	DHRS7C,ATP2A1,CAMK2B,FABP3,FKBP1A,HK2,HRC,AGL,JPH1,MEF2C,NOS1,KLHL41,PLEC,PLN,ANK1,CMYA5,CASQ1,HAX1,ATP2A2,RTN2,RYR1,S100A1,SLN,SRL,TMEM109,TMEM38A
GO:CC	cell part	GO:0044464	3.72779e-10	9.42855	17004	1172	1121	18842	NDUFB10,AATK,ABCA1,ABCA8,ABCD3,EIF3K,ABI3,ACAD11,ACADM,TPI1,ACADVL,COX5B,NDUFA4,ACOT1,ACOT13,ACSL1,ACTA1,ACTN2,ACTN3,ACTR1B,ACY3,ADAMTS1,EIF1,ADD3,ADIPOR1,ADRM1,ADSL,LMO1,AEBP1,NECAB3,AGMAT,SYNPO,AHCYL1,AIFM1,AK1,AK8,COX6A2,NDUFB4,ALAS1,ALDH5A1,MDH2,ALG11,SP8,COX7C,AMIGO1,AMPD1,AMT,ANAPC1,ANAPC13,TEX37,EIF4A2,ANKRD23,ANXA2,AP2S1,AP3S1,APCDD1,NDUFC2,APOC2,APOL3,APOLD1,MRPS7,APOPT1,APP,ARAF,ARF5,AR…
GO:CC	supramolecular fiber	GO:0099512	6.41399e-10	9.19287	977	1172	118	18842	ACTA1,ACTN2,ACTN3,SYNPO,AK1,ANKRD23,PARVB,CACNA1S,MYOZ1,COL27A1,CRYAB,CSRP3,CAPN3,TMOD4,DCTN3,DCXR,DES,DNAJA3,BIN1,TPM2,FBLN5,FBXO32,FHDC1,FHOD3,FKBP1A,GABARAP,GOLGA2,HOOK2,HRC,FHL3,IGFN1,IQGAP1,ITGB1BP2,JPH1,KEAP1,KLC4,KLHL21,KRT10,KRT82,KRTAP1-5,KRTAP4-11,KRTAP4-2,KRTAP4-6,SVIL,LMOD1,LMOD2,LRPPRC,LZTS2,MAP2K2,MEFV,MID1IP1,MYH1,MYH4,MYH6,MYH7,MYH7B,MYL1,MYL12A,MYL2,MYL3,MYLK2,MYLPF,MYOZ3,MYPN,PP…
GO:CC	supramolecular polymer	GO:0099081	1.1073e-09	8.95574	985	1172	118	18842	ACTA1,ACTN2,ACTN3,SYNPO,AK1,ANKRD23,PARVB,CACNA1S,MYOZ1,COL27A1,CRYAB,CSRP3,CAPN3,TMOD4,DCTN3,DCXR,DES,DNAJA3,BIN1,TPM2,FBLN5,FBXO32,FHDC1,FHOD3,FKBP1A,GABARAP,GOLGA2,HOOK2,HRC,FHL3,IGFN1,IQGAP1,ITGB1BP2,JPH1,KEAP1,KLC4,KLHL21,KRT10,KRT82,KRTAP1-5,KRTAP4-11,KRTAP4-2,KRTAP4-6,SVIL,LMOD1,LMOD2,LRPPRC,LZTS2,MAP2K2,MEFV,MID1IP1,MYH1,MYH4,MYH6,MYH7,MYH7B,MYL1,MYL12A,MYL2,MYL3,MYLK2,MYLPF,MYOZ3,MYPN,PP…
GO:CC	supramolecular complex	GO:0099080	1.18476e-09	8.92637	986	1172	118	18842	ACTA1,ACTN2,ACTN3,SYNPO,AK1,ANKRD23,PARVB,CACNA1S,MYOZ1,COL27A1,CRYAB,CSRP3,CAPN3,TMOD4,DCTN3,DCXR,DES,DNAJA3,BIN1,TPM2,FBLN5,FBXO32,FHDC1,FHOD3,FKBP1A,GABARAP,GOLGA2,HOOK2,HRC,FHL3,IGFN1,IQGAP1,ITGB1BP2,JPH1,KEAP1,KLC4,KLHL21,KRT10,KRT82,KRTAP1-5,KRTAP4-11,KRTAP4-2,KRTAP4-6,SVIL,LMOD1,LMOD2,LRPPRC,LZTS2,MAP2K2,MEFV,MID1IP1,MYH1,MYH4,MYH6,MYH7,MYH7B,MYL1,MYL12A,MYL2,MYL3,MYLK2,MYLPF,MYOZ3,MYPN,PP…
GO:CC	adherens junction	GO:0005912	1.54922e-09	8.80989	546	1172	78	18842	ACTN2,ACTN3,ANXA2,ARL2,RPS11,RPS14,RPL27,PARVB,CAPN2,CDH24,RPS16,RPL13A,RPS15,RPS3A,RPS5,CTNNA3,CYFIP1,RPS29,RPLP0,DES,RPL6,RPLP1,RPL8,RPL9,FHL1,FLII,FLRT2,RPL30,RPL7,RPL4,HSPA1A,HSPA8,FHL3,IQGAP1,ITGA6,RPS9,RPL22,LIN7B,SVIL,RPL38,MAP2K2,MPRIP,RPL10A,PRICKLE4,PACSIN2,PDLIM1,PDLIM3,PDLIM7,PLEC,PPP1CB,PPP1CC,PRKAR2A,RHOB,RPL12,RPL23,RPL3,RPL31,RPL37A,RPL5,RPL7A,RPLP2,RPS17,RPS18,RPS19,RPS2,ATP2A2,R…
GO:CC	organelle membrane	GO:0031090	1.64544e-09	8.78372	3500	1172	310	18842	NDUFB10,ABCA1,ABCD3,ACAD11,ACADM,ACADVL,COX5B,NDUFA4,ACSL1,NECAB3,AHCYL1,AIFM1,COX6A2,NDUFB4,ALG11,COX7C,ANXA2,AP2S1,AP3S1,NDUFC2,MRPS7,APOPT1,APP,COA3,DHRS7C,ATAD3B,NDUFA8,ATG14,ATP2A1,NDUFV2,UQCRC1,RPL27,COX4I1,ATP6,ATP6V1G1,ATRAID,B3GNT9,BCS1L,BECN1,BLOC1S1,BRI3,NDUFB11,UBA52,YBX1,CALCOCO2,CAMK2B,SLC25A3,CCDC155,CD164,CHCHD3,CHCHD6,CISD1,CLSTN1,COG8,COPB1,COQ10A,COX3,VDAC1,COX6C,COX7A2,COX7A2L…
GO:CC	cell	GO:0005623	2.05893e-09	8.68636	17069	1172	1122	18842	NDUFB10,AATK,ABCA1,ABCA8,ABCD3,EIF3K,ABI3,ACAD11,ACADM,TPI1,ACADVL,COX5B,NDUFA4,ACOT1,ACOT13,ACSL1,ACTA1,ACTN2,ACTN3,ACTR1B,ACY3,ADAMTS1,EIF1,ADD3,ADIPOR1,ADRM1,ADSL,LMO1,AEBP1,NECAB3,AGMAT,SYNPO,AHCYL1,AIFM1,AK1,AK8,COX6A2,NDUFB4,ALAS1,ALDH5A1,MDH2,ALG11,SP8,COX7C,AMIGO1,AMPD1,AMT,ANAPC1,ANAPC13,TEX37,EIF4A2,ANKRD23,ANXA2,AP2S1,AP3S1,APCDD1,NDUFC2,APOC2,APOL3,APOLD1,MRPS7,APOPT1,APP,ARAF,ARF5,AR…
GO:CC	anchoring junction	GO:0070161	2.35178e-09	8.6286	561	1172	79	18842	ACTN2,ACTN3,ANXA2,ARL2,RPS11,RPS14,RPL27,PARVB,CAPN2,CDH24,RPS16,RPL13A,RPS15,RPS3A,RPS5,CTNNA3,CYFIP1,RPS29,RPLP0,DES,RPL6,RPLP1,RPL8,RPL9,FHL1,FLII,FLRT2,RPL30,RPL7,RPL4,HSPA1A,HSPA8,FHL3,IQGAP1,ITGA6,RPS9,RPL22,LIN7B,SVIL,RPL38,MAP2K2,MPRIP,RPL10A,PRICKLE4,PACSIN2,PDLIM1,PDLIM3,PDLIM7,PLEC,PNN,PPP1CB,PPP1CC,PRKAR2A,RHOB,RPL12,RPL23,RPL3,RPL31,RPL37A,RPL5,RPL7A,RPLP2,RPS17,RPS18,RPS19,RPS2,ATP2…
GO:CC	sarcoplasmic reticulum	GO:0016529	5.82402e-09	8.23478	70	1172	23	18842	DHRS7C,ATP2A1,CAMK2B,FKBP1A,HK2,HRC,AGL,JPH1,NOS1,KLHL41,PLN,ANK1,CMYA5,CASQ1,HAX1,ATP2A2,RTN2,RYR1,S100A1,SLN,SRL,TMEM109,TMEM38A
GO:CC	intracellular non-membrane-bounded organelle	GO:0043232	3.08648e-08	7.51054	4904	1172	401	18842	ACADVL,ACOT13,ACTA1,ACTN2,ACTN3,ACTR1B,ADD3,SYNPO,AK1,AK8,SP8,ANKRD23,ANXA2,MRPS7,APP,ARL2,RPL21,ARX,ASH2L,ATG14,ATG2A,RPS11,RPS4Y1,RPS14,RPL27,B3GNT9,BANF1,BHLHE40,PARVB,BIRC2,BTBD1,BTF3,ESRRA,UBA52,EEF1D,C16ORF45,C19ORF53,YBX1,CACNA1S,CALCOCO2,CAMK2B,CAPN2,CCDC146,CCDC151,CCDC155,MYOZ1,RPS15A,CDKN2AIPNL,CENPP,CEP85,CIDEB,RPS16,CLIC5,RPL13A,CNTD2,RPL3L,EEF2,VDAC1,RPS15,COX7A2L,RPS3A,CREB5,CRYAB,…
GO:CC	non-membrane-bounded organelle	GO:0043228	4.00123e-08	7.39781	4913	1172	401	18842	ACADVL,ACOT13,ACTA1,ACTN2,ACTN3,ACTR1B,ADD3,SYNPO,AK1,AK8,SP8,ANKRD23,ANXA2,MRPS7,APP,ARL2,RPL21,ARX,ASH2L,ATG14,ATG2A,RPS11,RPS4Y1,RPS14,RPL27,B3GNT9,BANF1,BHLHE40,PARVB,BIRC2,BTBD1,BTF3,ESRRA,UBA52,EEF1D,C16ORF45,C19ORF53,YBX1,CACNA1S,CALCOCO2,CAMK2B,CAPN2,CCDC146,CCDC151,CCDC155,MYOZ1,RPS15A,CDKN2AIPNL,CENPP,CEP85,CIDEB,RPS16,CLIC5,RPL13A,CNTD2,RPL3L,EEF2,VDAC1,RPS15,COX7A2L,RPS3A,CREB5,CRYAB,…
GO:CC	respiratory chain complex IV	GO:0045277	1.91721e-06	5.71733	20	1172	11	18842	NDUFA4,COX6A2,COA3,COX4I1,COX3,COX6B1,UQCRFS1,COX7B,UQCRC2,COX8A,COX5A
GO:CC	respiratory chain complex III	GO:0045275	2.87464e-06	5.54142	13	1172	9	18842	UQCRC1,BCS1L,CYC1,UQCRH,UQCRFS1,UQCR10,UQCRQ,UQCRB,UQCRC2
GO:CC	mitochondrial respiratory chain complex III	GO:0005750	2.87464e-06	5.54142	13	1172	9	18842	UQCRC1,BCS1L,CYC1,UQCRH,UQCRFS1,UQCR10,UQCRQ,UQCRB,UQCRC2
GO:CC	membrane protein complex	GO:0098796	6.57005e-06	5.18243	1286	1172	130	18842	NDUFB10,NDUFA4,COX6A2,NDUFB4,AMIGO1,AP2S1,AP3S1,NDUFC2,COA3,NDUFA8,ATG14,ATP1A2,ATP2A1,NDUFV2,UQCRC1,COX4I1,ATP6,ATP6AP1L,ATP6V1G1,BCS1L,BECN1,BIRC2,NDUFB11,CACNA1S,CACNG6,CCDC155,CDH24,CHCHD3,CHCHD6,CLCN1,CLIC5,COPB1,COX3,VDAC1,CYC1,DDOST,COX6B1,APOO,UQCRH,NDUFB7,UQCRFS1,NDUFB2,EMC3,EPS8,NDUFB9,NDUFB3,FKBP1A,UQCR10,FOXRED1,UQCRQ,GNAS,GNB1,GNG10,GNG4,GNG5,NDUFS3,NDUFA1,SCN1B,HLA-A,HOOK2,SAMM50,HS…
GO:CC	sarcoplasmic reticulum membrane	GO:0033017	1.05748e-05	4.97573	38	1172	14	18842	DHRS7C,ATP2A1,CAMK2B,FKBP1A,JPH1,NOS1,KLHL41,PLN,CASQ1,ATP2A2,RYR1,SLN,TMEM109,TMEM38A
GO:CC	myosin II complex	GO:0016460	1.29709e-05	4.88703	23	1172	11	18842	MYH1,MYH14,MYH4,MYH6,MYH7,MYL1,MYL12A,MYL3,MYLPF,MYOM1,MYH2
GO:CC	vesicle	GO:0031982	2.00083e-05	4.69879	3891	1172	316	18842	ABCA1,TPI1,ACTA1,ACTN2,ACTN3,ACTR1B,ACY3,ADAMTS1,AEBP1,AHCYL1,AK1,MDH2,ANGPTL2,ANXA2,AP2S1,AP3S1,NDUFC2,APOC2,APP,ARF5,ATAD3B,ATG14,ATP1A2,RPS11,PGAM2,RPS14,RPL27,ATP6V1G1,AZGP1,BAG6,BECN1,BLVRB,BPIFA2,BRI3,UBA52,YBX1,CA2,CALCOCO2,CAMK2B,SLC25A3,CAPN2,CD164,RPS15A,CFH,CHCHD3,RPS16,CLIC5,CLSTN1,CMBL,CNKSR2,EEF2,COMMD3,COPB1,VDAC1,MAPKAP1,RPS3A,CPNE9,CPE,CPTP,CREB5,CRTC2,CRYAB,CS,RPS5,CYB561A3,CYB5…
GO:CC	catalytic complex	GO:1902494	3.93389e-05	4.40518	1391	1172	135	18842	NDUFB10,NDUFA4,ADRM1,NDUFB4,ANAPC1,ANAPC13,NDUFC2,ASH2L,NDUFA8,ATG14,NDUFV2,UQCRC1,BCKDK,BCS1L,BECN1,NDUFB11,CCNB3,PFKM,CNTD2,CYC1,CYCS,DDOST,DLAT,DLST,DYRK2,UQCRH,NDUFB7,UQCRFS1,NDUFB2,NDUFB9,FBXO32,ASB2,FBXW4,NDUFB3,UQCR10,FOXRED1,UQCRQ,GCSH,GMPR,GNAS,GNB1,GNG10,GNG4,GNG5,GPD1,GPD1L,NDUFS3,NDUFA1,HDAC11,HNRNPA1,AGL,HSD17B10,KEAP1,ENO3,KLHL21,SKP1,POLR2I,NDUFAB1,MED10,MIB2,NDUFS7,NAA10,ND4,NDUFA…
GO:CC	actin filament bundle	GO:0032432	3.97083e-05	4.40112	75	1172	19	18842	ACTA1,SYNPO,CRYAB,FHOD1,FHL3,MYH14,MYH6,MYH7,MYL12A,PRICKLE4,PDLIM1,PDLIM3,PDLIM7,PLS3,TPM1,SH2B2,SORBS1,TPM3,XIRP2
GO:CC	A band	GO:0031672	6.37358e-05	4.19562	37	1172	13	18842	CRYAB,LMOD2,MYH1,MYL2,MYL3,KLHL41,PPP1R12B,MYOM1,ANK1,CMYA5,S100A1,SMPX,TTN
GO:CC	eukaryotic 43S preinitiation complex	GO:0016282	7.78109e-05	4.10896	17	1172	9	18842	EIF3K,EIF1,EIF3F,EIF1B,EIF3E,EIF3H,EIF3L,EIF3G,EIF3I
GO:CC	myosin filament	GO:0032982	0.000101108	3.99522	22	1172	10	18842	MYBPC2,MYH1,MYH14,MYH4,MYH6,MYH7,MYH7B,MYOM1,MYH2,MYBPC1
GO:CC	cell junction	GO:0030054	0.000112771	3.9478	1312	1172	127	18842	ACTN2,ACTN3,ADD3,SYNPO,ANKRD23,ANXA2,APP,ARL2,ATP1A2,RPS11,RPS14,RPL27,PARVB,YBX3,CAMK2B,CAPN2,CDH24,RPS16,CLSTN1,RPL13A,CNKSR1,RPS15,RPS3A,RPS5,CTNNA3,CYFIP1,RPS29,RPLP0,DES,RPL6,DNAJA3,RPLP1,RPL8,RPL9,GSG1L,FHL1,EPS8,FHOD1,FLII,FLRT2,RPL30,RPL7,SCN1B,RPL4,HSPA1A,HSPA8,FHL3,SNTA1,IQGAP1,IQGAP3,ITGA6,KCTD12,RPS9,KLHL17,RPL22,LHFPL4,LIN7B,SVIL,RPL38,MAP2K2,CDK16,MPRIP,MPST,MRPL46,MRPS18B,RPL10A,MY…
GO:CC	mitochondrial intermembrane space	GO:0005758	0.000146718	3.83352	81	1172	19	18842	AIFM1,ARL2,NDUFA8,BLOC1S1,CAPN2,COX17,CYCS,COX6B1,NDUFB7,GATM,CHCHD2,MYOC,NDUFS1,NDUFS5,TRAP1,PINK1,HAX1,SOD1,TRIAP1
GO:CC	muscle myosin complex	GO:0005859	0.000147012	3.83265	18	1172	9	18842	MYH1,MYH4,MYH6,MYH7,MYL1,MYL3,MYLPF,MYOM1,MYH2
GO:CC	translation preinitiation complex	GO:0070993	0.000147012	3.83265	18	1172	9	18842	EIF3K,EIF1,EIF3F,EIF1B,EIF3E,EIF3H,EIF3L,EIF3G,EIF3I
GO:CC	organelle envelope lumen	GO:0031970	0.000186277	3.72984	90	1172	20	18842	AIFM1,APP,ARL2,NDUFA8,BLOC1S1,CAPN2,COX17,CYCS,COX6B1,NDUFB7,GATM,CHCHD2,MYOC,NDUFS1,NDUFS5,TRAP1,PINK1,HAX1,SOD1,TRIAP1
GO:CC	contractile actin filament bundle	GO:0097517	0.000226501	3.64493	68	1172	17	18842	ACTA1,SYNPO,FHOD1,FHL3,MYH14,MYH6,MYH7,MYL12A,PRICKLE4,PDLIM1,PDLIM3,PDLIM7,TPM1,SH2B2,SORBS1,TPM3,XIRP2
GO:CC	stress fiber	GO:0001725	0.000226501	3.64493	68	1172	17	18842	ACTA1,SYNPO,FHOD1,FHL3,MYH14,MYH6,MYH7,MYL12A,PRICKLE4,PDLIM1,PDLIM3,PDLIM7,TPM1,SH2B2,SORBS1,TPM3,XIRP2
GO:CC	membrane-enclosed lumen	GO:0031974	0.000290578	3.53674	5664	1172	427	18842	ABCD3,ACADM,ACADVL,ACTN2,ACTR1B,ADD3,ADRM1,LMO1,AIFM1,ALAS1,ALDH5A1,MDH2,SP8,AMT,ANAPC1,ANKRD23,ANXA2,APOLD1,MRPS7,APP,ARID5B,ARL2,ARPP19,ARX,ASH2L,NDUFA8,RPS11,RPS4Y1,RPS14,AUH,B3GNT9,BAG6,BANF1,BCKDK,BHLHE40,BLOC1S1,BLVRB,BTG1,ESRRA,UBA52,EEF1D,C19ORF47,C19ORF53,MAPK12,YBX1,CAMK2B,CAPN2,CARM1,ALKBH5,CCDC155,CCNB3,RPS15A,CDKN2AIPNL,CENPP,CEP85,CHRDL1,CIART,RPS16,CLK2,CLPP,RPL13A,COL21A1,COL27A1,…
GO:CC	organelle lumen	GO:0043233	0.000290578	3.53674	5664	1172	427	18842	ABCD3,ACADM,ACADVL,ACTN2,ACTR1B,ADD3,ADRM1,LMO1,AIFM1,ALAS1,ALDH5A1,MDH2,SP8,AMT,ANAPC1,ANKRD23,ANXA2,APOLD1,MRPS7,APP,ARID5B,ARL2,ARPP19,ARX,ASH2L,NDUFA8,RPS11,RPS4Y1,RPS14,AUH,B3GNT9,BAG6,BANF1,BCKDK,BHLHE40,BLOC1S1,BLVRB,BTG1,ESRRA,UBA52,EEF1D,C19ORF47,C19ORF53,MAPK12,YBX1,CAMK2B,CAPN2,CARM1,ALKBH5,CCDC155,CCNB3,RPS15A,CDKN2AIPNL,CENPP,CEP85,CHRDL1,CIART,RPS16,CLK2,CLPP,RPL13A,COL21A1,COL27A1,…
GO:CC	intracellular organelle lumen	GO:0070013	0.000290578	3.53674	5664	1172	427	18842	ABCD3,ACADM,ACADVL,ACTN2,ACTR1B,ADD3,ADRM1,LMO1,AIFM1,ALAS1,ALDH5A1,MDH2,SP8,AMT,ANAPC1,ANKRD23,ANXA2,APOLD1,MRPS7,APP,ARID5B,ARL2,ARPP19,ARX,ASH2L,NDUFA8,RPS11,RPS4Y1,RPS14,AUH,B3GNT9,BAG6,BANF1,BCKDK,BHLHE40,BLOC1S1,BLVRB,BTG1,ESRRA,UBA52,EEF1D,C19ORF47,C19ORF53,MAPK12,YBX1,CAMK2B,CAPN2,CARM1,ALKBH5,CCDC155,CCNB3,RPS15A,CDKN2AIPNL,CENPP,CEP85,CHRDL1,CIART,RPS16,CLK2,CLPP,RPL13A,COL21A1,COL27A1,…
GO:CC	troponin complex	GO:0005861	0.00053614	3.27072	8	1172	6	18842	TNNC1,TNNC2,TNNI1,TNNI2,TNNT1,TNNT3
GO:CC	actomyosin	GO:0042641	0.00056688	3.24651	80	1172	18	18842	ACTA1,SYNPO,FHOD1,FHL3,LURAP1,MYH14,MYH6,MYH7,MYL12A,PRICKLE4,PDLIM1,PDLIM3,PDLIM7,TPM1,SH2B2,SORBS1,TPM3,XIRP2
GO:CC	myosin complex	GO:0016459	0.000604501	3.2186	65	1172	16	18842	MYBPC2,MYH1,MYH14,MYH4,MYH6,MYH7,MYH7B,MYL1,MYL12A,MYL12B,MYL2,MYL3,MYLPF,MYOM1,MYH2,MYBPC1
GO:CC	eukaryotic translation initiation factor 3 complex	GO:0005852	0.00067031	3.17372	16	1172	8	18842	EIF3K,DDX3X,EIF3F,EIF3E,EIF3H,EIF3L,EIF3G,EIF3I
GO:CC	mitochondrial respiratory chain complex IV	GO:0005751	0.000793005	3.10072	12	1172	7	18842	NDUFA4,COX6A2,COA3,COX4I1,UQCRFS1,UQCRC2,COX5A
GO:CC	organellar ribosome	GO:0000313	0.00240385	2.61909	88	1172	18	18842	MRPS7,MRPL33,MRPL11,NDUFAB1,MRPL16,MRPL2,MRPL23,MRPL34,MRPL35,MRPL40,MRPL41,MRPL46,MRPL52,MRPL55,MRPS18B,MRPS33,NDUFA7,MRPL4
GO:CC	mitochondrial ribosome	GO:0005761	0.00240385	2.61909	88	1172	18	18842	MRPS7,MRPL33,MRPL11,NDUFAB1,MRPL16,MRPL2,MRPL23,MRPL34,MRPL35,MRPL40,MRPL41,MRPL46,MRPL52,MRPL55,MRPS18B,MRPS33,NDUFA7,MRPL4
GO:CC	organellar large ribosomal subunit	GO:0000315	0.00276369	2.55851	57	1172	14	18842	MRPL33,MRPL11,NDUFAB1,MRPL16,MRPL2,MRPL23,MRPL34,MRPL35,MRPL40,MRPL41,MRPL46,MRPL52,MRPL55,MRPL4
GO:CC	mitochondrial large ribosomal subunit	GO:0005762	0.00276369	2.55851	57	1172	14	18842	MRPL33,MRPL11,NDUFAB1,MRPL16,MRPL2,MRPL23,MRPL34,MRPL35,MRPL40,MRPL41,MRPL46,MRPL52,MRPL55,MRPL4
GO:CC	microbody	GO:0042579	0.00349459	2.4566	135	1172	23	18842	ABCD3,ACAD11,ACSL1,CRAT,DECR2,DHRS4,ECI2,IDH2,FIS1,GNPAT,GSTK1,IDI1,IMPDH2,ISOC1,MAP2K2,MLYCD,NUDT17,PEX2,PHYH,GRHPR,PXMP2,ECH1,SOD1
GO:CC	peroxisome	GO:0005777	0.00349459	2.4566	135	1172	23	18842	ABCD3,ACAD11,ACSL1,CRAT,DECR2,DHRS4,ECI2,IDH2,FIS1,GNPAT,GSTK1,IDI1,IMPDH2,ISOC1,MAP2K2,MLYCD,NUDT17,PEX2,PHYH,GRHPR,PXMP2,ECH1,SOD1
GO:CC	M band	GO:0031430	0.00415148	2.3818	25	1172	9	18842	CRYAB,LMOD2,KLHL41,MYOM1,ANK1,CMYA5,S100A1,SMPX,TTN
GO:CC	intrinsic component of mitochondrial membrane	GO:0098573	0.00442721	2.35387	75	1172	16	18842	COA3,SLC25A3,CHCHD3,CHCHD6,APOO,SLC25A4,ETFDH,FIS1,MFN2,MPC1,OXA1L,PET100,PINK1,TIMM17A,TIMM17B,TOMM40
GO:CC	T-tubule	GO:0030315	0.00473879	2.32433	52	1172	13	18842	ATP1A2,CACNA1S,CACNG6,CAPN3,BIN1,SCN1B,PPP3CB,FXYD1,NOS1,CASQ1,RTN2,RYR1,STAC3
GO:CC	eukaryotic 48S preinitiation complex	GO:0033290	0.0054576	2.263	15	1172	7	18842	EIF3K,EIF3F,EIF3E,EIF3H,EIF3L,EIF3G,EIF3I
GO:CC	terminal cisterna	GO:0014802	0.00555879	2.25502	4	1172	4	18842	FKBP1A,CASQ1,RTN2,RYR1
GO:CC	eukaryotic translation elongation factor 1 complex	GO:0005853	0.00555879	2.25502	4	1172	4	18842	EEF1D,EEF1A1,EEF1A2,EEF1B2
GO:CC	cytoskeleton	GO:0005856	0.00558176	2.25323	2221	1172	185	18842	ACOT13,ACTA1,ACTN2,ACTN3,ACTR1B,ADD3,SYNPO,AK1,AK8,ANKRD23,APP,ARL2,ATG14,PARVB,ESRRA,C16ORF45,CALCOCO2,CAMK2B,CAPN2,CCDC146,CCDC151,CCDC155,MYOZ1,CEP85,CLIC5,CNTD2,CRYAB,CSRP3,CTNNA3,TMOD4,DCTN3,DCXR,DES,PGM1,DNAJA3,DYRK2,EEF1A1,ELMOD3,BIN1,TPM2,FHDC1,FHOD1,FHOD3,FLII,GABARAP,GAPDH,GOLGA2,GYPC,GSDMC,HOOK2,HSBP1,HSPA1A,HSPA2,HSPB7,HYPK,FHL3,IFT172,FRMD3,SNTA1,IQGAP1,IST1,KEAP1,KLC4,KLHL17,KLHL21,…
GO:CC	outer membrane	GO:0019867	0.00591582	2.22799	209	1172	30	18842	ACSL1,UBA52,CCDC155,CISD1,VDAC1,CPTP,DDX3X,FAM210B,FIS1,HK2,SAMM50,LRPPRC,MAOA,MAOB,MFN2,MYOC,PHB2,VDAC3,PINK1,PPP1CC,VDAC2,RETSAT,HAX1,ANKH,RPS27A,TMEM109,UBB,UBC,TOMM40,VAT1
GO:CC	actin filament	GO:0005884	0.00717636	2.1441	122	1172	21	18842	ACTA1,ACTN2,ACTN3,DNAJA3,TPM2,IQGAP1,KEAP1,LMOD1,LMOD2,PRICKLE4,PDLIM1,PDLIM3,PDLIM7,PLS3,RCSD1,RHOQ,TPM1,SMTN,SH2B2,TPM3,TWF2
GO:CC	extracellular space	GO:0005615	0.0112805	1.94767	3541	1172	274	18842	TPI1,ACTA1,ACTN2,ACTN3,ACTR1B,ACY3,AEBP1,AHCYL1,AK1,MDH2,ANGPTL2,ANXA2,APOC2,APP,ARF5,RPS11,PGAM2,RPS14,RPL27,ATP6V1G1,AZGP1,BAG6,BLOC1S1,BLVRB,BPIFA2,UBA52,YBX1,CA2,SLC25A3,CAPN2,RPS15A,CFH,CHCHD3,RPS16,CKM,CLIC5,CMBL,CNKSR2,COL27A1,COL9A2,EEF2,VDAC1,RPS3A,CPNE9,CPAMD8,CPE,CPSF3L,CPXM2,CREB5,CRTC2,CRYAB,CS,RPS5,CYB5R1,CYFIP1,RPS29,DAAM2,DBI,RPLP0,DCXR,DDX3X,DES,PGM1,APOO,EEF1G,EEF1A1,EGF,EIF3E,E…
GO:CC	extracellular region part	GO:0044421	0.0118614	1.92586	3751	1172	288	18842	TPI1,ACTA1,ACTN2,ACTN3,ACTR1B,ACY3,ADAMTS1,AEBP1,AHCYL1,AK1,MDH2,ANGPTL2,ANXA2,APOC2,APP,ARF5,ASPN,ATP1A2,RPS11,PGAM2,RPS14,RPL27,ATP6V1G1,AZGP1,BAG6,BLOC1S1,BLVRB,BPIFA2,ESRRA,UBA52,YBX1,CA2,SLC25A3,CAPN2,RPS15A,CFH,CHCHD3,RPS16,CKM,CLIC5,CMBL,CNKSR2,COL21A1,COL27A1,COL9A2,EEF2,VDAC1,RPS3A,CPNE9,CPAMD8,CPE,CPSF3L,CPXM2,CREB5,CRTC2,CRYAB,CS,RPS5,CYB5R1,CYFIP1,RPS29,DAAM2,DBI,RPLP0,DCXR,DDX3X,DES,…
GO:CC	organelle outer membrane	GO:0031968	0.0128953	1.88957	207	1172	29	18842	ACSL1,UBA52,CCDC155,CISD1,VDAC1,CPTP,DDX3X,FAM210B,FIS1,HK2,SAMM50,LRPPRC,MAOA,MAOB,MFN2,MYOC,PHB2,VDAC3,PINK1,PPP1CC,VDAC2,RETSAT,HAX1,RPS27A,TMEM109,UBB,UBC,TOMM40,VAT1
GO:CC	integral component of mitochondrial membrane	GO:0032592	0.0155932	1.80706	74	1172	15	18842	COA3,SLC25A3,CHCHD3,CHCHD6,APOO,SLC25A4,ETFDH,FIS1,MPC1,OXA1L,PET100,PINK1,TIMM17A,TIMM17B,TOMM40
GO:CC	integral component of mitochondrial inner membrane	GO:0031305	0.0340201	1.46826	46	1172	11	18842	COA3,SLC25A3,CHCHD3,CHCHD6,APOO,ETFDH,MPC1,OXA1L,PET100,TIMM17A,TIMM17B
GO:CC	intrinsic component of mitochondrial inner membrane	GO:0031304	0.0340201	1.46826	46	1172	11	18842	COA3,SLC25A3,CHCHD3,CHCHD6,APOO,ETFDH,MPC1,OXA1L,PET100,TIMM17A,TIMM17B
GO:CC	sarcolemma	GO:0042383	0.0373442	1.42778	136	1172	21	18842	ANXA2,ATP1A2,CACNA1S,CACNG6,CLCN1,CAPN3,DES,BIN1,SCN1B,SNTA1,PPP3CB,MYOT,FXYD1,NOS1,PLEC,ANK1,CASQ1,RTN2,RYR1,STAC2,STAC3
KEGG	Ribosome	KEGG:03010	1.95389e-58	57.7091	134	605	84	7772	MRPS7,RPL21,RPS11,RPS4Y1,RPS14,RPL27,UBA52,RPS15A,RPS16,RPL13A,RPL3L,RPS15,RPS3A,RPS5,RPS29,RPLP0,RPL6,RPS24,RPLP1,RPL8,RPL9,RPS27,FAU,RPS20,RPL27A,RPL30,MRPL33,RPL7,RPL4,RPS9,RPL22,RPL37,RPL38,RPL10,RPL32,RPL35,MRPL11,MRPL16,MRPL2,MRPL23,MRPL34,MRPL35,RPL29,RPL10A,RPS25,RPL13,RPS28,RPL15,RPL11,RPL12,RPS6,RPL14,RPL18A,RPL39,RPL23,RPL23A,RPS23,RPL3,RPL34,RPL35A,RPL36,RPL36A,RPL31,RPL37A,RPL41,RPL5…
KEGG	Parkinson disease	KEGG:05012	1.34023e-38	37.8728	142	605	70	7772	NDUFB10,COX5B,NDUFA4,COX6A2,NDUFB4,COX7C,NDUFC2,NDUFA8,NDUFV2,UQCRC1,COX4I1,ATP6,NDUFB11,COX3,VDAC1,COX6C,COX7A2,COX7A2L,CYC1,CYCS,COX6B1,SLC25A4,UQCRH,NDUFB7,UQCRFS1,NDUFB2,NDUFB9,UQCR11,NDUFB3,UQCR10,UQCRQ,NDUFS3,NDUFA1,COX7B,NDUFAB1,NDUFS7,ND4,NDUFA10,UQCRB,NDUFA3,NDUFA5,NDUFA6,NDUFA7,NDUFB1,NDUFA2,NDUFC1,NDUFS1,NDUFS2,NDUFS4,NDUFS5,NDUFV1,UQCRC2,COX7A1,ATP5J,VDAC3,PINK1,PPIF,COX8A,VDAC2,ATP5G…
KEGG	Oxidative phosphorylation	KEGG:00190	2.04836e-35	34.6886	133	605	65	7772	NDUFB10,COX5B,NDUFA4,COX6A2,NDUFB4,COX7C,NDUFC2,NDUFA8,NDUFV2,UQCRC1,COX4I1,ATP6,ATP6V1G1,NDUFB11,COX17,COX3,COX6C,COX7A2,COX7A2L,CYC1,COX6B1,UQCRH,NDUFB7,UQCRFS1,NDUFB2,NDUFB9,UQCR11,NDUFB3,UQCR10,UQCRQ,NDUFS3,NDUFA1,COX7B,NDUFAB1,NDUFS7,ND4,NDUFA10,UQCRB,NDUFA3,NDUFA5,NDUFA6,NDUFA7,NDUFB1,NDUFA2,NDUFC1,NDUFS1,NDUFS2,NDUFS4,NDUFS5,NDUFV1,UQCRC2,COX7A1,ATP5J,PPA2,COX8A,ATP5G1,COX5A,NDUFA9,NDUFS6,…
KEGG	Alzheimer disease	KEGG:05010	5.63656e-34	33.249	171	605	72	7772	NDUFB10,COX5B,NDUFA4,COX6A2,NDUFB4,COX7C,NDUFC2,APP,NDUFA8,ATP2A1,NDUFV2,UQCRC1,COX4I1,ATP6,NDUFB11,CACNA1S,CAPN2,COX3,COX6C,COX7A2,COX7A2L,CYC1,CYCS,COX6B1,UQCRH,NDUFB7,UQCRFS1,NDUFB2,NDUFB9,UQCR11,NDUFB3,UQCR10,UQCRQ,GAPDH,NDUFS3,NDUFA1,HSD17B10,COX7B,NDUFAB1,NDUFS7,NDUFA10,UQCRB,RTN4,NDUFA3,NDUFA5,NDUFA6,NDUFA7,PPP3CB,NDUFB1,NDUFA2,NDUFC1,NDUFS1,NDUFS2,NDUFS4,NDUFS5,NDUFV1,NOS1,UQCRC2,COX7A1,A…
KEGG	Huntington disease	KEGG:05016	5.79232e-33	32.2371	191	605	75	7772	NDUFB10,COX5B,NDUFA4,COX6A2,NDUFB4,COX7C,AP2S1,NDUFC2,NDUFA8,NDUFV2,UQCRC1,COX4I1,ATP6,NDUFB11,COX3,VDAC1,COX6C,COX7A2,COX7A2L,CREB5,CYC1,CYCS,COX6B1,SLC25A4,UQCRH,NDUFB7,UQCRFS1,NDUFB2,NDUFB9,UQCR11,NDUFB3,UQCR10,UQCRQ,NDUFS3,NDUFA1,POLR2I,COX7B,NDUFAB1,NDUFS7,NDUFA10,UQCRB,NDUFA3,NDUFA5,NDUFA6,NDUFA7,NDUFB1,NDUFA2,NDUFC1,NDUFS1,NDUFS2,NDUFS4,NDUFS5,NDUFV1,UQCRC2,COX7A1,ATP5J,VDAC3,POLR2J,POLR2L…
KEGG	Non-alcoholic fatty liver disease (NAFLD)	KEGG:04932	1.21317e-29	28.9161	149	605	63	7772	NDUFB10,COX5B,NDUFA4,ADIPOR1,COX6A2,NDUFB4,COX7C,NDUFC2,NDUFA8,NDUFV2,UQCRC1,COX4I1,NDUFB11,COX3,COX6C,COX7A2,COX7A2L,CYC1,CYCS,COX6B1,UQCRH,NDUFB7,UQCRFS1,NDUFB2,NDUFB9,UQCR11,NDUFB3,UQCR10,UQCRQ,NDUFS3,NDUFA1,MAPK9,COX7B,NDUFAB1,NDUFS7,NDUFA10,UQCRB,NDUFA3,NDUFA5,NDUFA6,NDUFA7,NDUFB1,NDUFA2,ATF4,NDUFC1,NDUFS1,NDUFS2,NDUFS4,NDUFS5,NDUFV1,UQCRC2,COX7A1,PIK3R1,COX8A,COX5A,NDUFA9,NDUFS6,SDHB,NDUFB6…
KEGG	Thermogenesis	KEGG:04714	9.24446e-26	25.0341	231	605	74	7772	NDUFB10,COX5B,NDUFA4,ACSL1,COX6A2,NDUFB4,COX7C,NDUFC2,COA3,NDUFA8,NDUFV2,UQCRC1,COX4I1,ATP6,NDUFB11,MAPK12,COX17,COX3,COX6C,COX7A2,COX7A2L,CREB5,CYC1,COX6B1,UQCRH,NDUFB7,UQCRFS1,NDUFB2,NDUFB9,UQCR11,NDUFB3,UQCR10,UQCRQ,GNAS,NDUFS3,NDUFA1,COX7B,NDUFAB1,NDUFS7,ND4,NDUFA10,UQCRB,NDUFA3,NDUFA5,NDUFA6,NDUFA7,NDUFAF3,NDUFAF5,NDUFB1,NDUFA2,NDUFC1,NDUFS1,NDUFS2,NDUFS4,NDUFS5,NDUFV1,UQCRC2,COX7A1,ATP5J,PN…
KEGG	Cardiac muscle contraction	KEGG:04260	2.7935e-16	15.5539	86	605	36	7772	COX5B,COX6A2,COX7C,ATP1A2,ATP2A1,UQCRC1,COX4I1,CACNA1S,CACNG6,COX3,COX6C,COX7A2,COX7A2L,CYC1,COX6B1,UQCRH,UQCRFS1,UQCR11,TPM2,UQCR10,UQCRQ,HRC,COX7B,MYH6,MYH7,MYL2,MYL3,UQCRB,UQCRC2,COX7A1,COX8A,TPM1,COX5A,ATP2A2,TNNC1,TPM3
KEGG	Metabolic pathways	KEGG:01100	1.30359e-15	14.8849	1432	605	195	7772	NDUFB10,ACADM,TPI1,ACADVL,COX5B,NDUFA4,ACOT1,ACSL1,ACYP2,ADSL,AGMAT,AHCYL1,AK1,AK8,COX6A2,NDUFB4,ALAS1,ALDH5A1,MDH2,ALG11,COX7C,AMPD1,AMT,NDUFC2,NDUFA8,NDUFV2,UQCRC1,PGAM2,COX4I1,ATP6,ATP6V1G1,AUH,BLVRB,NDUFB11,CA14,CA2,CA3,CARNS1,CHKB,CKM,CMBL,PFKM,ADSSL1,COX17,COX3,COX6C,COX7A2,COX7A2L,MGST3,CS,CYC1,NMNAT3,DCXR,DDOST,COX6B1,DHRS4,PGM1,DLAT,DLST,UQCRH,ECHS1,NDUFB7,UQCRFS1,NDUFB2,IDH2,EPRS,NDUFB9…
KEGG	Carbon metabolism	KEGG:01200	2.38074e-11	10.6233	117	605	36	7772	TPI1,MDH2,AMT,PGAM2,PFKM,CS,DLAT,DLST,ECHS1,IDH2,FH,GAPDH,GCSH,GOT1,GPT2,HK2,ENO3,MDH1,ACADS,GPI,OGDH,PCCB,PDHA1,PDHB,PGK1,PKM,ACAT1,SDHB,SDHA,SDHC,SDHD,ACO2,FBP2,SUCLA2,SUCLG1,SUCLG2
KEGG	Citrate cycle (TCA cycle)	KEGG:00020	3.64455e-11	10.4384	30	605	18	7772	MDH2,CS,DLAT,DLST,IDH2,FH,MDH1,OGDH,PDHA1,PDHB,SDHB,SDHA,SDHC,SDHD,ACO2,SUCLA2,SUCLG1,SUCLG2
KEGG	Retrograde endocannabinoid signaling	KEGG:04723	1.21175e-10	9.91659	148	605	40	7772	NDUFB10,NDUFA4,NDUFB4,NDUFC2,NDUFA8,NDUFV2,NDUFB11,MAPK12,CACNA1S,NDUFB7,NDUFB2,NDUFB9,NDUFB3,GNB1,GNG10,GNG4,GNG5,NDUFS3,NDUFA1,MAPK9,NDUFAB1,NDUFS7,ND4,NDUFA10,NDUFA3,NDUFA5,NDUFA6,NDUFA7,NDUFB1,NDUFA2,NDUFC1,NDUFS1,NDUFS2,NDUFS4,NDUFS5,NDUFV1,NDUFA9,NDUFS6,NDUFB6,NDUFA13
KEGG	Pyruvate metabolism	KEGG:00620	7.39983e-05	4.13078	39	605	14	7772	ACYP2,MDH2,DLAT,FH,HAGH,LDHB,MDH1,PDHA1,PDHB,PKM,GRHPR,LDHA,ACAT1,LDHD
KEGG	Glyoxylate and dicarboxylate metabolism	KEGG:00630	0.000953009	3.0209	30	605	11	7772	MDH2,AMT,CS,GCSH,GLUL,HYI,MDH1,PCCB,GRHPR,ACAT1,ACO2
KEGG	Glycolysis / Gluconeogenesis	KEGG:00010	0.00565996	2.24719	68	605	16	7772	TPI1,PGAM2,PFKM,PGM1,DLAT,GAPDH,HK2,ENO3,LDHB,GPI,PDHA1,PDHB,PGK1,PKM,LDHA,FBP2
KEGG	Propanoate metabolism	KEGG:00640	0.0211215	1.67528	34	605	10	7772	ECHS1,LDHB,ACADS,MLYCD,PCCB,LDHA,ACAT1,SUCLA2,SUCLG1,SUCLG2
KEGG	Peroxisome	KEGG:04146	0.0431487	1.36503	80	605	16	7772	ABCD3,ACSL1,CRAT,DECR2,DHRS4,ECI2,IDH2,GNPAT,GSTK1,MLYCD,PEX2,PHYH,PRDX1,PXMP2,ECH1,SOD1

## Sheet: lightgreen
source	term_name	term_id	adjusted_p_value	negative_log10_of_adjusted_p_value	term_size	query_size	intersection_size	effective_domain_size	intersections
GO:MF	protein binding	GO:0005515	6.9694e-16	15.1568	12715	763	639	18098	AASDH,ABCG1,ABI3BP,ABL1,ACACB,ACTC1,ACTR3,ACVR2B,ADAR,ADM,AFTPH,AGO2,AGPAT5,AHSA1,AIDA,AMPD3,ANGPT1,ANGPTL1,ANKIB1,ANKRD10,ANKRD13A,ANKRD17,ANP32B,ANTXR2,ANXA8,APOOL,ARF4,ARF6,ARHGAP17,ARHGAP18,ARHGAP21,ARHGEF2,ARL8A,ARMCX1,ARPC3,ARPP21,ARRDC3,ASAP1,ATP1B4,ATP6V1F,ATRIP,ATXN7L3,BANP,BATF2,BOD1L1,BRD4,BSG,BST2,BTBD10,BTG2,BTN3A2,BTN3A3,BTNL9,BZW1,C10ORF71,C11ORF54,C17ORF58,C19ORF66,C1S,C5ORF24,C9O…
GO:MF	binding	GO:0005488	1.1993e-08	7.92107	15910	763	724	18098	AASDH,ABCG1,ABI3BP,ABL1,ACACB,ACTC1,ACTR3,ACVR2B,ADAR,ADCK1,ADM,ADPRHL2,AFTPH,AGO2,AGPAT5,AHSA1,AIDA,AKR1C2,ALDH2,AMPD3,ANGPT1,ANGPTL1,ANKIB1,ANKRD10,ANKRD13A,ANKRD17,ANP32B,ANTXR2,ANXA8,APOOL,ARF4,ARF6,ARHGAP17,ARHGAP18,ARHGAP21,ARHGEF2,ARL5B,ARL8A,ARMCX1,ARPC3,ARPP21,ARRDC3,ASAP1,ATP1B4,ATP6V1F,ATP9A,ATRIP,ATXN7L3,B4GALT5,BANP,BATF2,BBX,BOD1L1,BRD4,BSG,BST2,BTBD10,BTG2,BTN3A2,BTN3A3,BTNL9,BZW1,…
GO:MF	RNA binding	GO:0003723	1.72294e-05	4.76373	1902	763	129	18098	ADAR,AGO2,ANKRD17,BST2,BZW1,C19ORF66,C1ORF131,CANX,CARS,CBX4,CCAR1,CCNT1,CCT3,CELF2,CIRBP,CPSF3,CWC22,DAZAP1,DDX27,DDX5,DDX50,DDX58,DDX60,DDX60L,DHX15,DHX32,DNMT1,DYNC1H1,EDF1,EIF2AK2,EIF4A3,EIF4B,ERH,EXOSC6,FMR1,FNDC3B,GOT2,HADHB,HELZ2,HERC5,HMGB2,HNRNPC,HNRNPK,HNRNPM,HSP90AA1,HSP90B1,IFI16,IFIH1,IFIT1,IFIT2,IFIT5,ISG20,KDM2B,KHDRBS1,KMT2C,KPNA2,LONP1,LUC7L,MANF,MAPRE1,MBNL1,MOV10,MRPS21,MYC,MYH…
GO:MF	double-stranded RNA binding	GO:0003725	0.00144104	2.84132	74	763	14	18098	ADAR,AGO2,DDX58,DDX60,DHX15,EIF2AK2,EIF4B,FMR1,IFIH1,MBNL1,OAS1,OAS2,OAS3,OASL
GO:MF	catalytic activity, acting on a protein	GO:0140096	0.0019681	2.70595	2233	763	137	18098	ABL1,ACVR2B,ADCK1,ANKIB1,ASPRV1,BRD4,C1R,C1S,CAMK2G,CASP7,CBX4,CCNB1IP1,CCNI,CDKN1A,CFB,CFD,CHFR,CRIM1,CTDSP2,CTSA,DDI2,DPP3,DTX3L,DUSP1,DUSP18,DUSP23,EIF2AK2,EPHA8,EYA3,FBXL5,FBXO27,FBXO6,FGFR1,FGFRL1,GOLGA7,HDAC4,HDAC5,HERC1,HERC5,HERC6,IGF2R,IRAK1,IRAK2,IRF2BPL,JAK1,KCTD10,KDELC2,KDM2B,KDM5D,KMT2C,KMT2D,LAP3,LATS2,LNPEP,LONP1,MGAT4B,MIER1,MLKL,MYH8,MYLK,MYLK3,OBSCN,OMA1,OTUD6B,PALD1,PAM,PAN3,P…
GO:MF	ubiquitin-like protein transferase activity	GO:0019787	0.004807	2.31813	417	763	38	18098	ANKIB1,CBX4,CCNB1IP1,CHFR,DTX3L,FBXL5,FBXO27,FBXO6,HDAC4,HERC1,HERC5,HERC6,IRF2BPL,KCTD10,PPP1R11,RBCK1,RNF13,RNF135,RNF145,RNF149,RNF19A,RNF20,RNF213,RSPRY1,SH3RF3,TAF1,TRIM21,TRIM25,TRIM47,TRIM56,UBA3,UBE2D1,UBE2D4,UBE2E2,UBE2L6,UBE2Z,UHRF2,ZNRF3
GO:MF	single-stranded RNA binding	GO:0003727	0.0102944	1.9874	87	763	14	18098	AGO2,CBX4,DAZAP1,DDX58,DDX60,EIF4A3,EIF4B,FMR1,HNRNPC,IFIH1,IFIT5,KHDRBS1,LONP1,POLR2G
GO:MF	protein domain specific binding	GO:0019904	0.0126568	1.89768	708	763	54	18098	ABL1,AIDA,ARHGAP17,C9ORF89,CHMP1B,CHMP2A,CRIM1,CTBP1,DDX5,DNAJA1,FGFR1,FZD7,GHR,GNG12,GRASP,HGS,HMGB2,HNRNPK,HNRNPM,HSP90AA1,HSPA5,INPP5A,KHDRBS1,KRAS,LAMP1,LUC7L,MAVS,MITD1,MRPL17,MVB12A,MYD88,MYH9,NFE2L2,PLEKHA2,PLSCR1,PRKACA,PRRX1,PTEN,RXRA,SH3BP5,SH3KBP1,SP1,TCEAL1,TCEAL4,TCEAL7,TCEAL8,TMEM88,TRAK2,USP8,WARS,XPO1,YWHAB,ZBTB16,ZNF106
GO:MF	ubiquitin-protein transferase activity	GO:0004842	0.0160077	1.79567	391	763	35	18098	ANKIB1,CCNB1IP1,CHFR,DTX3L,FBXL5,FBXO27,FBXO6,HERC1,HERC5,HERC6,IRF2BPL,KCTD10,PPP1R11,RBCK1,RNF13,RNF135,RNF145,RNF149,RNF19A,RNF20,RNF213,RSPRY1,SH3RF3,TAF1,TRIM21,TRIM25,TRIM47,TRIM56,UBE2D1,UBE2D4,UBE2E2,UBE2L6,UBE2Z,UHRF2,ZNRF3
GO:MF	enzyme binding	GO:0019899	0.0175369	1.75605	2228	763	132	18098	ABL1,AGO2,ANGPT1,ANKIB1,ANP32B,ARF4,ARF6,ARHGAP17,ARHGEF2,BOD1L1,BRD4,CAV3,CBX4,CCNI,CCNT1,CCNY,CDC42EP3,CDC42SE2,CDK2AP1,CDK5RAP3,CDKN1A,CORO1C,DDX5,DDX58,DENND5A,DENND6A,DNAJA1,DTX3L,DUSP1,ETS1,FBXO8,FMNL2,GHR,GOLPH3,GOT2,GPIHBP1,GRASP,GSTM3,GYS1,HDAC4,HDAC5,HERC1,HGS,HMOX1,HSP90AA1,HSP90B1,HSPA5,IGF2R,IL15RA,IL6R,IPO8,ISG15,ITGAV,JAK1,JUP,KCTD10,KIFAP3,KIZ,KPNA2,LAMP1,LDB3,LONP1,MAPRE1,MARCKS,…
GO:MF	transferase activity	GO:0016740	0.0314494	1.50239	2359	763	137	18098	ABL1,ACVR2B,ADCK1,AGPAT5,ANKIB1,ART3,B4GALT5,BRD4,CAMK2G,CBX4,CCNB1IP1,CCNI,CDKN1A,CERS5,CHFR,CHKB-CPT1B,CLOCK,CMPK2,CMTR1,COL4A3BP,CRIM1,DGKZ,DNMT1,DTX3L,EIF2AK2,EPC1,EPC2,EPHA8,FBXL5,FBXO27,FBXO6,FGFR1,FGFRL1,FTO,GIT2,GLRX,GLT1D1,GOLGA7,GOT2,GSTM3,GSTM5,GYS1,HADHA,HADHB,HDAC4,HERC1,HERC5,HERC6,HGS,IGF2R,IP6K2,IRAK1,IRAK2,IRF2BPL,JAK1,KAT6A,KCTD10,KDELC2,KMT2C,KMT2D,LATS2,METTL17,MGAT4B,MLKL,MYL…
GO:MF	purine ribonucleoside triphosphate binding	GO:0035639	0.0460747	1.33654	1845	763	111	18098	AASDH,ABCG1,ABL1,ACACB,ACTC1,ACTR3,ACVR2B,ADCK1,ARF4,ARF6,ARL5B,ARL8A,ATP9A,CAMK2G,CARS,CCT3,CCT7,CCT8,CHTF18,CMPK2,DDX27,DDX5,DDX50,DDX58,DDX60,DDX60L,DGKZ,DHX15,DHX32,DNAJA1,DYNC1H1,EHD4,EIF2AK2,EIF4A3,EPHA8,FGFR1,GATC,GBP3,GIMAP2,GIMAP7,GIMAP8,GNA13,HELZ2,HSP90AA1,HSP90B1,HSPA5,HYOU1,IFI44L,IFIH1,IP6K2,IRAK1,IRAK2,JAK1,KRAS,LATS2,LONP1,MLKL,MOV10,MX1,MX2,MYH10,MYH8,MYH9,MYLK,MYLK3,NLRC5,NRAS,O…
GO:MF	2'-5'-oligoadenylate synthetase activity	GO:0001730	0.0497683	1.30305	3	763	3	18098	OAS1,OAS2,OAS3
GO:BP	response to type I interferon	GO:0034340	8.00511e-29	28.0966	99	733	42	17847	ADAR,BST2,C19ORF66,HLA-B,HLA-C,HLA-F,HLA-G,IFI27,IFI35,IFI6,IFIT1,IFIT2,IFIT3,IFITM1,IFITM2,IFITM3,IP6K2,IRAK1,IRF7,IRF9,ISG15,ISG20,JAK1,MAVS,MX1,MX2,MYD88,NLRC5,OAS1,OAS2,OAS3,OASL,PSMB8,RSAD2,SAMHD1,STAT1,STAT2,TBK1,TRIM56,USP18,XAF1,YTHDF2
GO:BP	type I interferon signaling pathway	GO:0060337	3.4677e-27	26.46	95	733	40	17847	ADAR,BST2,HLA-B,HLA-C,HLA-F,HLA-G,IFI27,IFI35,IFI6,IFIT1,IFIT2,IFIT3,IFITM1,IFITM2,IFITM3,IP6K2,IRAK1,IRF7,IRF9,ISG15,ISG20,JAK1,MAVS,MX1,MX2,MYD88,NLRC5,OAS1,OAS2,OAS3,OASL,PSMB8,RSAD2,SAMHD1,STAT1,STAT2,TBK1,USP18,XAF1,YTHDF2
GO:BP	cellular response to type I interferon	GO:0071357	3.4677e-27	26.46	95	733	40	17847	ADAR,BST2,HLA-B,HLA-C,HLA-F,HLA-G,IFI27,IFI35,IFI6,IFIT1,IFIT2,IFIT3,IFITM1,IFITM2,IFITM3,IP6K2,IRAK1,IRF7,IRF9,ISG15,ISG20,JAK1,MAVS,MX1,MX2,MYD88,NLRC5,OAS1,OAS2,OAS3,OASL,PSMB8,RSAD2,SAMHD1,STAT1,STAT2,TBK1,USP18,XAF1,YTHDF2
GO:BP	defense response to virus	GO:0051607	7.66717e-18	17.1154	247	733	50	17847	ADAR,ANKRD17,BST2,C19ORF66,DDX58,DDX60,DTX3L,EIF2AK2,GBP3,HERC5,IFI16,IFI27,IFI44L,IFI6,IFIH1,IFIT1,IFIT2,IFIT3,IFIT5,IFITM1,IFITM2,IFITM3,IRF7,IRF9,ISG15,ISG20,MAVS,MOV10,MX1,MX2,NLRC5,OAS1,OAS2,OAS3,OASL,PARP9,PLSCR1,RSAD2,RTP4,SAMHD1,SERINC3,STAT1,STAT2,TBK1,TRIM22,TRIM25,TRIM38,TRIM56,ZC3HAV1,ZMYND11
GO:BP	response to virus	GO:0009615	1.5911e-15	14.7983	333	733	55	17847	ADAR,ANKRD17,BST2,C19ORF66,DDX58,DDX60,DTX3L,EIF2AK2,FMR1,GBP3,HERC5,IFI16,IFI27,IFI44,IFI44L,IFI6,IFIH1,IFIT1,IFIT2,IFIT3,IFIT5,IFITM1,IFITM2,IFITM3,IRF7,IRF9,ISG15,ISG20,MAVS,MOV10,MX1,MX2,NLRC5,OAS1,OAS2,OAS3,OASL,ODC1,PARP9,PENK,PLSCR1,RRP1B,RSAD2,RTP4,SAMHD1,SERINC3,STAT1,STAT2,TBK1,TRIM22,TRIM25,TRIM38,TRIM56,ZC3HAV1,ZMYND11
GO:BP	viral process	GO:0016032	1.45521e-12	11.8371	832	733	87	17847	ADAR,ANKRD17,BRD4,BST2,C19ORF66,CCNT1,CD81,CFH,CHMP1B,CHMP2A,CHMP5,COPS6,CTBP1,CX3CR1,DDX5,DDX58,DYNLT1,EIF2AK2,FMR1,HLA-B,HNRNPK,IFI16,IFI27,IFIH1,IFIT1,IFIT5,IFITM1,IFITM2,IFITM3,IGF2R,IRAK1,IRF7,ISG15,ISG20,ITGAV,KPNA2,LAMP1,MAVS,MVB12A,MX1,NCKAP1,NFE2L2,NXF1,OAS1,OAS2,OAS3,OASL,PABPN1,PARP10,PDCD6IP,PI4KA,PLSCR1,POLR2G,PSMA3,PSMA4,PSMB8,PSMB9,RAB1B,RBCK1,RRP1B,RSAD2,RXRA,SATB1,SEC13,SF3B2,SP1…
GO:BP	regulation of multi-organism process	GO:0043900	1.57743e-12	11.802	773	733	83	17847	ADAR,AGO2,ANKRD17,BST2,C19ORF66,CCNT1,CHMP2A,DDX5,DDX58,DDX60,DTX3L,DYNLT1,EIF2AK2,FMR1,FUCA2,HDAC4,HERC5,HLA-B,HLA-F,HLA-G,HMGB2,HSP90B1,IFI16,IFI27,IFIH1,IFIT1,IFIT5,IFITM1,IFITM2,IFITM3,IGF2R,IRAK1,IRAK2,IRF7,ISG15,ISG20,ITGAV,JAK1,KPNA2,KRAS,LAMP1,MAVS,MUC3A,MX1,MYD88,NLRC5,NMI,NONO,NRAS,OAS1,OAS2,OAS3,OASL,PARP10,PARP14,PARP9,PGLYRP4,PLSCR1,POLR2G,PRKACA,PSMA3,PSMA4,PSMB8,PSMB9,PSMD11,PSME1,…
GO:BP	symbiotic process	GO:0044403	2.58782e-12	11.5871	886	733	90	17847	ADAR,ANKRD17,BRD4,BST2,C19ORF66,CCNT1,CD81,CFH,CHMP1B,CHMP2A,CHMP5,COPS6,CTBP1,CX3CR1,DDX5,DDX58,DYNLT1,EIF2AK2,FMR1,FUCA2,HLA-B,HNRNPK,IFI16,IFI27,IFIH1,IFIT1,IFIT5,IFITM1,IFITM2,IFITM3,IGF2R,IRAK1,IRF7,ISG15,ISG20,ITGAV,KPNA2,LAMP1,MAVS,MVB12A,MX1,NCKAP1,NFE2L2,NXF1,OAS1,OAS2,OAS3,OASL,PABPN1,PARP10,PDCD6IP,PI4KA,PLSCR1,POLR2G,PSMA3,PSMA4,PSMB8,PSMB9,RAB1B,RBCK1,RRP1B,RSAD2,RXRA,SATB1,SEC13,SER…
GO:BP	interspecies interaction between organisms	GO:0044419	3.26262e-12	11.4864	936	733	93	17847	ADAR,ANKRD17,BRD4,BST2,C19ORF66,CCNT1,CD81,CFH,CHMP1B,CHMP2A,CHMP5,COPS6,CTBP1,CX3CR1,DDX5,DDX58,DYNLT1,EIF2AK2,FMR1,FUCA2,HIST1H2BK,HLA-B,HNRNPK,IFI16,IFI27,IFIH1,IFIT1,IFIT5,IFITM1,IFITM2,IFITM3,IGF2R,IRAK1,IRF7,ISG15,ISG20,ITGAV,KPNA2,LAMP1,MAVS,MVB12A,MX1,NCKAP1,NFE2L2,NXF1,OAS1,OAS2,OAS3,OASL,PABPN1,PARP10,PDCD6IP,PGLYRP4,PI4KA,PLSCR1,POLR2G,PSMA3,PSMA4,PSMB8,PSMB9,RAB1B,RBCK1,RRP1B,RSAD2,RX…
GO:BP	regulation of symbiosis, encompassing mutualism through parasitism	GO:0043903	3.79274e-11	10.421	224	733	39	17847	ADAR,BST2,C19ORF66,CCNT1,CHMP2A,DDX5,DYNLT1,EIF2AK2,FMR1,FUCA2,IFI16,IFI27,IFIT1,IFIT5,IFITM1,IFITM2,IFITM3,IGF2R,ISG15,ISG20,ITGAV,KPNA2,MAVS,MX1,OAS1,OAS2,OAS3,OASL,PARP10,PLSCR1,POLR2G,RRP1B,RSAD2,SP1,STAT1,TRIM21,TRIM25,TRIM38,ZC3HAV1
GO:BP	regulation of viral genome replication	GO:0045069	4.18022e-11	10.3788	99	733	26	17847	ADAR,BST2,C19ORF66,DDX5,EIF2AK2,FMR1,IFI16,IFI27,IFIT1,IFIT5,IFITM1,IFITM2,IFITM3,ISG15,ISG20,MAVS,MX1,OAS1,OAS2,OAS3,OASL,PARP10,PLSCR1,RSAD2,TRIM38,ZC3HAV1
GO:BP	viral genome replication	GO:0019079	5.4955e-11	10.26	126	733	29	17847	ADAR,BST2,C19ORF66,CTBP1,DDX5,EIF2AK2,FMR1,IFI16,IFI27,IFIT1,IFIT5,IFITM1,IFITM2,IFITM3,ISG15,ISG20,MAVS,MX1,OAS1,OAS2,OAS3,OASL,PARP10,PI4KA,PLSCR1,RSAD2,TRIM38,UBP1,ZC3HAV1
GO:BP	negative regulation of viral genome replication	GO:0045071	7.4685e-11	10.1268	63	733	21	17847	BST2,C19ORF66,EIF2AK2,IFI16,IFIT1,IFIT5,IFITM1,IFITM2,IFITM3,ISG15,ISG20,MAVS,MX1,OAS1,OAS2,OAS3,OASL,PARP10,PLSCR1,RSAD2,ZC3HAV1
GO:BP	regulation of viral process	GO:0050792	9.02421e-11	10.0446	208	733	37	17847	ADAR,BST2,C19ORF66,CCNT1,CHMP2A,DDX5,DYNLT1,EIF2AK2,FMR1,IFI16,IFI27,IFIT1,IFIT5,IFITM1,IFITM2,IFITM3,IGF2R,ISG15,ISG20,KPNA2,MAVS,MX1,OAS1,OAS2,OAS3,OASL,PARP10,PLSCR1,POLR2G,RRP1B,RSAD2,SP1,STAT1,TRIM21,TRIM25,TRIM38,ZC3HAV1
GO:BP	innate immune response	GO:0045087	1.84197e-10	9.73472	1000	733	93	17847	ACTR3,ADAR,ANKRD17,ARHGEF2,BST2,C19ORF66,C1S,CAMK2G,CD47,CFB,CFD,CFH,CX3CR1,DDX58,DDX60,DTX3L,EIF2AK2,GBP3,HERC5,HIST1H2BK,HLA-B,HLA-C,HLA-F,HLA-G,HMGB2,HSP90B1,IFI16,IFI27,IFI35,IFI6,IFIH1,IFIT1,IFIT2,IFIT3,IFIT5,IFITM1,IFITM2,IFITM3,IP6K2,IRAK1,IRAK2,IRF7,IRF9,ISG15,ISG20,JAK1,KRAS,LAMP1,MAVS,MUC3A,MX1,MX2,MYD88,NLRC5,NMI,NONO,NRAS,NUB1,OAS1,OAS2,OAS3,OASL,PARP14,PARP9,PGLYRP4,PLSCR1,PRKACA,PSM…
GO:BP	regulation of viral life cycle	GO:1903900	8.51342e-10	9.0699	149	733	30	17847	ADAR,BST2,C19ORF66,CHMP2A,DDX5,EIF2AK2,FMR1,IFI16,IFI27,IFIT1,IFIT5,IFITM1,IFITM2,IFITM3,ISG15,ISG20,KPNA2,MAVS,MX1,OAS1,OAS2,OAS3,OASL,PARP10,PLSCR1,RSAD2,TRIM21,TRIM25,TRIM38,ZC3HAV1
GO:BP	negative regulation of viral life cycle	GO:1903901	1.52867e-09	8.81569	88	733	23	17847	BST2,C19ORF66,EIF2AK2,IFI16,IFIT1,IFIT5,IFITM1,IFITM2,IFITM3,ISG15,ISG20,MAVS,MX1,OAS1,OAS2,OAS3,OASL,PARP10,PLSCR1,RSAD2,TRIM21,TRIM25,ZC3HAV1
GO:BP	defense response to other organism	GO:0098542	5.54149e-09	8.25637	1196	733	101	17847	ACTR3,ADAR,ANKRD17,ARHGEF2,BATF2,BST2,C19ORF66,C1S,CAMK2G,CD47,CFB,CFD,CFH,CX3CR1,DDX58,DDX60,DTX3L,EIF2AK2,GBP3,HERC5,HIST1H2BK,HLA-B,HLA-C,HLA-F,HLA-G,HMGB2,HSP90B1,IFI16,IFI27,IFI35,IFI44L,IFI6,IFIH1,IFIT1,IFIT2,IFIT3,IFIT5,IFITM1,IFITM2,IFITM3,IL6R,IP6K2,IRAK1,IRAK2,IRF7,IRF9,ISG15,ISG20,JAK1,KRAS,LAMP1,MAVS,MOV10,MUC3A,MX1,MX2,MYD88,NLRC5,NMI,NONO,NRAS,NUB1,OAS1,OAS2,OAS3,OASL,PARP14,PARP9,P…
GO:BP	negative regulation of multi-organism process	GO:0043901	7.01767e-09	8.15381	227	733	36	17847	ADAR,BST2,C19ORF66,EIF2AK2,HLA-B,HLA-F,HLA-G,IFI16,IFIT1,IFIT5,IFITM1,IFITM2,IFITM3,ISG15,ISG20,ITGAV,MAVS,MX1,NLRC5,NMI,OAS1,OAS2,OAS3,OASL,PARP10,PARP14,PLSCR1,RSAD2,SAMHD1,SERPINB9,STAT1,TRIM21,TRIM25,TRIM38,YTHDF2,ZC3HAV1
GO:BP	negative regulation of viral process	GO:0048525	9.04636e-09	8.04353	104	733	24	17847	BST2,C19ORF66,EIF2AK2,IFI16,IFIT1,IFIT5,IFITM1,IFITM2,IFITM3,ISG15,ISG20,MAVS,MX1,OAS1,OAS2,OAS3,OASL,PARP10,PLSCR1,RSAD2,STAT1,TRIM21,TRIM25,ZC3HAV1
GO:BP	viral life cycle	GO:0019058	1.24887e-08	7.90348	330	733	44	17847	ADAR,BST2,C19ORF66,CD81,CHMP1B,CHMP2A,CHMP5,CTBP1,DDX5,DYNLT1,EIF2AK2,FMR1,IFI16,IFI27,IFIT1,IFIT5,IFITM1,IFITM2,IFITM3,ISG15,ISG20,ITGAV,KPNA2,LAMP1,MAVS,MVB12A,MX1,OAS1,OAS2,OAS3,OASL,PARP10,PDCD6IP,PI4KA,PLSCR1,RAB1B,RSAD2,SEC13,TRIM21,TRIM25,TRIM38,UBP1,XPO1,ZC3HAV1
GO:BP	cellular macromolecule catabolic process	GO:0044265	2.75121e-08	7.56048	1194	733	99	17847	AGO2,ANAPC15,ANKIB1,BTG2,CAV3,CCDC115,CD81,CDK5RAP3,CHFR,CIRBP,CLOCK,CNOT6L,CTSA,DAB2,DCP1A,DDI2,DDX5,DTX3L,EDEM3,EIF4A3,EXOSC6,FBXL5,FBXO27,FBXO33,FBXO6,FBXO8,FMR1,FTO,HELZ2,HMGB2,HNRNPC,HNRNPM,HSP90AA1,HSP90B1,HSPA5,IFI27,ISG15,ISG20,KCTD10,LONP1,MOV10,MVB12A,MYD88,NFE2L2,NUB1,OAS2,OMA1,PAN3,PCNP,PDCD6IP,PNRC2,POLR2G,PPP1R11,PPT1,PRKACA,PSMA3,PSMA4,PSMB8,PSMB9,PSMD11,PSME1,PTEN,PTTG1IP,RBCK1,RN…
GO:BP	cytokine-mediated signaling pathway	GO:0019221	3.42609e-08	7.4652	797	733	75	17847	ADAR,ANGPT1,BST2,CAMK2G,CANX,CBFB,CDKN1A,CX3CR1,CXCL11,GHR,HLA-B,HLA-C,HLA-F,HLA-G,HMOX1,HSP90AA1,HSP90B1,IFI27,IFI35,IFI6,IFIT1,IFIT2,IFIT3,IFITM1,IFITM2,IFITM3,IL15RA,IL6R,IP6K2,IRAK1,IRAK2,IRF7,IRF9,ISG15,ISG20,JAK1,KRAS,MAVS,MX1,MX2,MYC,MYD88,NLRC5,NMI,OAS1,OAS2,OAS3,OASL,OSMR,PARP14,PARP9,PRKACA,PSMA3,PSMA4,PSMB8,PSMB9,PSMD11,PSME1,RALA,RBCK1,RSAD2,SAMHD1,SH2B3,STAT1,STAT2,TAX1BP1,TBK1,TNFRS…
GO:BP	interferon-gamma-mediated signaling pathway	GO:0060333	8.07727e-08	7.09274	87	733	21	17847	CAMK2G,HLA-B,HLA-C,HLA-F,HLA-G,IRF7,IRF9,JAK1,NLRC5,NMI,OAS1,OAS2,OAS3,OASL,PARP14,PARP9,STAT1,TRIM21,TRIM22,TRIM25,TRIM38
GO:BP	response to cytokine	GO:0034097	8.21231e-08	7.08553	1217	733	99	17847	ACTR3,ADAR,ANGPT1,ARHGEF2,BST2,C19ORF66,CAMK2G,CANX,CBFB,CD47,CDKN1A,CX3CR1,CXCL11,DDX58,DUSP1,EIF2AK2,ETS1,FGF4,GBP3,GHR,HDAC4,HLA-B,HLA-C,HLA-F,HLA-G,HMOX1,HSP90AA1,HSP90B1,HSPA5,IFI16,IFI27,IFI35,IFI6,IFIH1,IFIT1,IFIT2,IFIT3,IFITM1,IFITM2,IFITM3,IL15RA,IL6R,IP6K2,IRAK1,IRAK2,IRF7,IRF9,ISG15,ISG20,JAK1,KRAS,MAVS,MX1,MX2,MYC,MYD88,MYLK3,NFAT5,NFE2L2,NLRC5,NMI,NUB1,OAS1,OAS2,OAS3,OASL,OSMR,PARP14…
GO:BP	response to other organism	GO:0051707	1.52337e-07	6.8172	1536	733	116	17847	ABL1,ACTR3,ADAR,ADM,ANKRD17,ARHGEF2,BATF2,BST2,C19ORF66,C1S,CAMK2G,CD47,CFB,CFD,CFH,CHMP5,CMPK2,CX3CR1,CXCL11,DDX58,DDX60,DTX3L,EIF2AK2,FMR1,FUCA2,GBP3,GNG12,HDAC5,HERC5,HERC6,HIST1H2BK,HLA-B,HLA-C,HLA-F,HLA-G,HMGB2,HSP90B1,IFI16,IFI27,IFI35,IFI44,IFI44L,IFI6,IFIH1,IFIT1,IFIT2,IFIT3,IFIT5,IFITM1,IFITM2,IFITM3,IL6R,IP6K2,IRAK1,IRAK2,IRF7,IRF9,ISG15,ISG20,JAK1,KRAS,LAMP1,MAVS,MOV10,MUC3A,MX1,MX2,MY…
GO:BP	protein ubiquitination	GO:0016567	1.63117e-07	6.7875	840	733	76	17847	ABL1,ANGPT1,ANKIB1,ARRDC3,ATXN7L3,CBFB,CCNB1IP1,CDK5RAP3,CHFR,DNAJA1,DTX3L,FBXL5,FBXO27,FBXO33,FBXO6,HERC1,HERC5,HERC6,HIST1H2BD,HIST1H2BK,HSP90AA1,HSPA5,IFI27,IRF2BPL,ISG15,KCTD10,KDM2B,LNPEP,NFE2L2,NMI,NUB1,PARP10,PCNP,PPP1R11,PSMA3,PSMA4,PSMB8,PSMB9,PSMD11,PSME1,PTEN,PTTG1IP,RASSF5,RBCK1,RNF13,RNF135,RNF145,RNF149,RNF169,RNF19A,RNF20,RNF213,RSPRY1,SDE2,SH3RF3,SOCS4,SPSB3,TAF1,TGFBR1,TRIM21,TRI…
GO:BP	response to external biotic stimulus	GO:0043207	1.65209e-07	6.78197	1538	733	116	17847	ABL1,ACTR3,ADAR,ADM,ANKRD17,ARHGEF2,BATF2,BST2,C19ORF66,C1S,CAMK2G,CD47,CFB,CFD,CFH,CHMP5,CMPK2,CX3CR1,CXCL11,DDX58,DDX60,DTX3L,EIF2AK2,FMR1,FUCA2,GBP3,GNG12,HDAC5,HERC5,HERC6,HIST1H2BK,HLA-B,HLA-C,HLA-F,HLA-G,HMGB2,HSP90B1,IFI16,IFI27,IFI35,IFI44,IFI44L,IFI6,IFIH1,IFIT1,IFIT2,IFIT3,IFIT5,IFITM1,IFITM2,IFITM3,IL6R,IP6K2,IRAK1,IRAK2,IRF7,IRF9,ISG15,ISG20,JAK1,KRAS,LAMP1,MAVS,MOV10,MUC3A,MX1,MX2,MY…
GO:BP	multi-organism process	GO:0051704	1.70873e-07	6.76733	3042	733	193	17847	ABL1,ACTR3,ADAR,ADM,AGO2,ANKRD17,ARHGEF2,BATF2,BRD4,BSG,BST2,C19ORF66,C1S,CAMK2G,CCNB1IP1,CCNI,CCNT1,CCT3,CCT7,CCT8,CD47,CD81,CFB,CFD,CFH,CHMP1B,CHMP2A,CHMP5,CLOCK,CMPK2,COPS6,CTBP1,CX3CR1,CXCL11,DAZAP1,DDX5,DDX58,DDX60,DNAJA1,DTX3L,DYNLT1,EIF2AK2,ETS1,FMR1,FUCA2,GBP3,GGNBP2,GNG12,GOT2,HDAC4,HDAC5,HERC5,HERC6,HERPUD2,HIST1H2BK,HLA-B,HLA-C,HLA-F,HLA-G,HMGB2,HNRNPK,HSP90B1,IFI16,IFI27,IFI35,IFI44,I…
GO:BP	response to biotic stimulus	GO:0009607	1.99084e-07	6.70096	1561	733	117	17847	ABL1,ACTR3,ADAR,ADM,ANKRD17,ARHGEF2,BATF2,BST2,C19ORF66,C1S,CAMK2G,CD47,CFB,CFD,CFH,CHMP5,CMPK2,CX3CR1,CXCL11,DDX58,DDX60,DTX3L,EIF2AK2,FMR1,FUCA2,GBP3,GNG12,HDAC5,HERC5,HERC6,HIST1H2BK,HLA-B,HLA-C,HLA-F,HLA-G,HMGB2,HSP90B1,HSPA5,IFI16,IFI27,IFI35,IFI44,IFI44L,IFI6,IFIH1,IFIT1,IFIT2,IFIT3,IFIT5,IFITM1,IFITM2,IFITM3,IL6R,IP6K2,IRAK1,IRAK2,IRF7,IRF9,ISG15,ISG20,JAK1,KRAS,LAMP1,MAVS,MOV10,MUC3A,MX1,…
GO:BP	response to organic substance	GO:0010033	2.59006e-07	6.58669	3388	733	209	17847	ABCG1,ABL1,ACACB,ACTC1,ACTR3,ACVR2B,ADAR,ADM,AKR1C2,ANGPT1,ARF6,ARHGEF2,ARPC3,ATP6V1F,BSG,BST2,BTG2,C19ORF66,C2CD5,CAMK2G,CANX,CASP7,CASQ2,CAV3,CBFB,CD47,CD81,CDK5RAP3,CDKN1A,CHMP5,CILP,CLOCK,CMPK2,CRIPAK,CTDSP2,CX3CR1,CXCL11,DAB2,DDI2,DDX5,DDX58,DHX15,DNAJA1,DNAJB11,DNAJB4,DNMT1,DOK5,DUSP1,EDEM3,EHD4,EID2,EIF2AK2,EIF4A3,EPHA8,ESD,ETS1,FBXO27,FBXO6,FGF4,FGFR1,FGFRL1,FHL2,FMR1,FZD7,GBP3,GHR,GJD3,G…
GO:BP	protein modification by small protein conjugation	GO:0032446	3.806e-07	6.41953	922	733	80	17847	ABL1,ANGPT1,ANKIB1,ARRDC3,ATXN7L3,CBFB,CBX4,CCNB1IP1,CDK5RAP3,CHFR,DNAJA1,DTX3L,FBXL5,FBXO27,FBXO33,FBXO6,HDAC4,HERC1,HERC5,HERC6,HIST1H2BD,HIST1H2BK,HSP90AA1,HSPA5,IFI27,IFIH1,IRF2BPL,ISG15,KCTD10,KDM2B,LNPEP,NFE2L2,NMI,NUB1,PARP10,PCNP,PPP1R11,PSMA3,PSMA4,PSMB8,PSMB9,PSMD11,PSME1,PTEN,PTTG1IP,RASSF5,RBCK1,RNF13,RNF135,RNF145,RNF149,RNF169,RNF19A,RNF20,RNF213,RSPRY1,SDE2,SH3RF3,SOCS4,SPSB3,TAF1,…
GO:BP	protein modification by small protein conjugation or removal	GO:0070647	4.69322e-07	6.32853	1132	733	92	17847	ABL1,ANGPT1,ANKIB1,ARRDC3,ATXN7L3,CBFB,CBX4,CCNB1IP1,CDK5RAP3,CHFR,COPS6,DDX58,DNAJA1,DTX3L,FBXL5,FBXO27,FBXO33,FBXO6,HDAC4,HERC1,HERC5,HERC6,HGS,HIST1H2BD,HIST1H2BK,HSP90AA1,HSPA5,IFI27,IFIH1,IRF2BPL,ISG15,KCTD10,KDM2B,LNPEP,MYC,NFE2L2,NMI,NUB1,OTUD6B,PARP10,PCNP,PPP1R11,PSMA3,PSMA4,PSMB8,PSMB9,PSMD11,PSME1,PTEN,PTTG1IP,RASSF5,RBCK1,RNF13,RNF135,RNF145,RNF149,RNF169,RNF19A,RNF20,RNF213,RSPRY1,SD…
GO:BP	cellular protein catabolic process	GO:0044257	1.08931e-06	5.96285	792	733	71	17847	ANAPC15,ANKIB1,CAV3,CCDC115,CD81,CDK5RAP3,CHFR,CLOCK,CTSA,DAB2,DDI2,DTX3L,EDEM3,FBXL5,FBXO27,FBXO33,FBXO6,FBXO8,FMR1,HSP90AA1,HSP90B1,HSPA5,IFI27,ISG15,KCTD10,LONP1,MVB12A,NFE2L2,NUB1,OMA1,PCNP,PDCD6IP,PPP1R11,PPT1,PRKACA,PSMA3,PSMA4,PSMB8,PSMB9,PSMD11,PSME1,PTEN,PTTG1IP,RBCK1,RNF13,RNF149,RNF19A,RNF20,RSPRY1,SOCS4,SPSB3,TAF1,TBL1XR1,TRIM25,TRIM38,UBA1,UBAC2,UBE2D1,UBE2D4,UBE2L6,UBE2Z,USP10,USP11…
GO:BP	response to interferon-gamma	GO:0034341	1.12674e-06	5.94818	196	733	30	17847	ACTR3,BST2,C19ORF66,CAMK2G,CD47,GBP3,HLA-B,HLA-C,HLA-F,HLA-G,IFITM1,IFITM2,IFITM3,IRF7,IRF9,JAK1,NLRC5,NMI,NUB1,OAS1,OAS2,OAS3,OASL,PARP14,PARP9,STAT1,TRIM21,TRIM22,TRIM25,TRIM38
GO:BP	cellular response to cytokine stimulus	GO:0071345	1.41404e-06	5.84954	1121	733	90	17847	ACTR3,ADAR,ANGPT1,ARHGEF2,BST2,CAMK2G,CANX,CBFB,CD47,CDKN1A,CX3CR1,CXCL11,DUSP1,FGF4,GBP3,GHR,HDAC4,HLA-B,HLA-C,HLA-F,HLA-G,HMOX1,HSP90AA1,HSP90B1,HSPA5,IFI16,IFI27,IFI35,IFI6,IFIT1,IFIT2,IFIT3,IFITM1,IFITM2,IFITM3,IL15RA,IL6R,IP6K2,IRAK1,IRAK2,IRF7,IRF9,ISG15,ISG20,JAK1,KRAS,MAVS,MX1,MX2,MYC,MYD88,MYLK3,NFAT5,NFE2L2,NLRC5,NMI,OAS1,OAS2,OAS3,OASL,OSMR,PARP14,PARP9,PDIA3,PRKACA,PSMA3,PSMA4,PSMB8,P…
GO:BP	macromolecule catabolic process	GO:0009057	1.69244e-06	5.77149	1431	733	107	17847	AGO2,ANAPC15,ANKIB1,BANP,BTG2,CAV3,CCDC115,CD81,CDK5RAP3,CHFR,CIRBP,CLOCK,CNOT6L,CTSA,DAB2,DCP1A,DDI2,DDX5,DTX3L,EDEM3,EIF4A3,EXOSC6,FBXL5,FBXO27,FBXO33,FBXO6,FBXO8,FMR1,FTO,HELZ2,HGS,HMGB2,HNRNPC,HNRNPM,HSP90AA1,HSP90B1,HSPA5,IFI27,ISG15,ISG20,KCTD10,LNPEP,LONP1,LUM,MOV10,MVB12A,MYD88,NFE2L2,NUB1,OAS2,ODC1,OMA1,PAN3,PCNP,PDCD6IP,PGLYRP4,PNRC2,POLR2G,PPP1R11,PPT1,PRKACA,PSMA3,PSMA4,PSMB8,PSMB9,PS…
GO:BP	immune effector process	GO:0002252	2.14034e-06	5.66952	1273	733	98	17847	ABL1,ACTR3,ADAR,AMPD3,ANGPT1,ANKRD17,ARL8A,ARPC3,BST2,BTN3A2,BTN3A3,C19ORF66,C1R,C1S,CCT8,CD47,CD81,CFB,CFD,CFH,CTSA,DDX58,DDX60,DTX3L,DYNC1H1,DYNLT1,EIF2AK2,EXOSC6,FUCA2,GBP3,GOLGA7,HERC5,HLA-B,HLA-C,HLA-F,HLA-G,HMOX1,HSP90AA1,IFI16,IFI27,IFI44L,IFI6,IFIH1,IFIT1,IFIT2,IFIT3,IFIT5,IFITM1,IFITM2,IFITM3,IGF2R,IRF7,IRF9,ISG15,ISG20,ITGAV,JUP,LAMP1,MAVS,MDK,MLEC,MOV10,MX1,MX2,NCKAP1,NFKBIZ,NLRC5,NRAS…
GO:BP	response to stress	GO:0006950	3.35468e-06	5.47435	4085	733	237	17847	ABL1,ACTR3,ADAR,ADM,ADPRHL2,AIDA,ANKRD17,ANXA8,ARF4,ARHGEF2,ARPP21,ATRIP,BATF2,BOD1L1,BRD4,BST2,BTG2,C19ORF66,C1S,CAMK2G,CANX,CAV3,CD151,CD47,CD81,CDK5RAP3,CDKN1A,CFB,CFD,CFH,CIRBP,CLOCK,CNOT6L,COL4A3BP,COPS6,CTDSP2,CX3CR1,CXCL11,DDX5,DDX58,DDX60,DGKZ,DNAJA1,DNAJB11,DNAJB4,DTX3L,DUSP1,EDEM3,EIF2AK2,EPC2,ERP29,ETS1,EYA3,F8,FBXO27,FBXO6,FMR1,FNIP2,FTO,FZD7,GBP3,GNA13,GP1BA,GPX3,GPX8,GSTM3,HDAC4,HDA…
GO:BP	defense response	GO:0006952	4.93367e-06	5.30683	1760	733	123	17847	ACTR3,ADAR,ADM,ANKRD17,ARHGEF2,BATF2,BRD4,BST2,C19ORF66,C1S,CAMK2G,CD47,CD81,CFB,CFD,CFH,CLOCK,CX3CR1,CXCL11,DDX58,DDX60,DTX3L,EIF2AK2,ETS1,F8,GBP3,HDAC4,HDAC5,HERC5,HIST1H2BK,HLA-B,HLA-C,HLA-F,HLA-G,HMGB2,HMOX1,HSP90B1,IFI16,IFI27,IFI35,IFI44L,IFI6,IFIH1,IFIT1,IFIT2,IFIT3,IFIT5,IFITM1,IFITM2,IFITM3,IL6R,IP6K2,IRAK1,IRAK2,IRF7,IRF9,ISG15,ISG20,JAK1,KRAS,LAMP1,LGALS3BP,MAVS,MDK,MICU1,MOV10,MUC3A,M…
GO:BP	protein catabolic process	GO:0030163	1.09546e-05	4.9604	956	733	78	17847	ANAPC15,ANKIB1,BANP,CAV3,CCDC115,CD81,CDK5RAP3,CHFR,CLOCK,CTSA,DAB2,DDI2,DTX3L,EDEM3,FBXL5,FBXO27,FBXO33,FBXO6,FBXO8,FMR1,HGS,HSP90AA1,HSP90B1,HSPA5,IFI27,ISG15,KCTD10,LNPEP,LONP1,MVB12A,NFE2L2,NUB1,ODC1,OMA1,PCNP,PDCD6IP,PPP1R11,PPT1,PRKACA,PSMA3,PSMA4,PSMB8,PSMB9,PSMD11,PSME1,PTEN,PTTG1IP,RBCK1,RNF13,RNF149,RNF19A,RNF20,RSPRY1,SNX9,SOCS4,SPSB3,TAF1,TBL1XR1,TIMP2,TRIM25,TRIM38,UBA1,UBAC2,UBE2D1,…
GO:BP	cellular protein modification process	GO:0006464	1.57614e-05	4.80241	4196	733	239	17847	ABL1,ACVR2B,ADAR,ADCK1,ADPRHL2,AIDA,ANGPT1,ANKIB1,ARF4,ARHGEF2,ARRDC3,ART3,ATXN7L3,B4GALT5,BOD1L1,BRD4,BTG2,CAMK2G,CAV3,CBFB,CBX4,CCNB1IP1,CCNI,CCNL2,CCNT1,CCNY,CD81,CDK2AP1,CDK5RAP3,CDKN1A,CHFR,CLOCK,COPS6,CORO1C,CRIPAK,CTBP1,CTDSP2,CX3CR1,DAB2,DDX58,DNAJA1,DNAJC24,DNMT1,DOK5,DTX3L,DUSP1,DUSP18,DUSP23,EDEM3,EHD4,EIF2AK2,EPC1,EPC2,EPHA8,ERP29,EYA3,FBXL5,FBXO27,FBXO33,FBXO6,FGF4,FGFR1,FMR1,FNIP2,F…
GO:BP	protein modification process	GO:0036211	1.57614e-05	4.80241	4196	733	239	17847	ABL1,ACVR2B,ADAR,ADCK1,ADPRHL2,AIDA,ANGPT1,ANKIB1,ARF4,ARHGEF2,ARRDC3,ART3,ATXN7L3,B4GALT5,BOD1L1,BRD4,BTG2,CAMK2G,CAV3,CBFB,CBX4,CCNB1IP1,CCNI,CCNL2,CCNT1,CCNY,CD81,CDK2AP1,CDK5RAP3,CDKN1A,CHFR,CLOCK,COPS6,CORO1C,CRIPAK,CTBP1,CTDSP2,CX3CR1,DAB2,DDX58,DNAJA1,DNAJC24,DNMT1,DOK5,DTX3L,DUSP1,DUSP18,DUSP23,EDEM3,EHD4,EIF2AK2,EPC1,EPC2,EPHA8,ERP29,EYA3,FBXL5,FBXO27,FBXO33,FBXO6,FGF4,FGFR1,FMR1,FNIP2,F…
GO:BP	protein metabolic process	GO:0019538	1.79538e-05	4.74584	5905	733	315	17847	ABCG1,ABL1,ACVR2B,ADAR,ADCK1,ADPRHL2,AGO2,AIDA,ANAPC15,ANGPT1,ANKIB1,ANP32B,ANXA8,ARF4,ARHGEF2,ARRDC3,ART3,ASPRV1,ATXN7L3,B4GALT5,BANP,BOD1L1,BRD4,BST2,BTG2,C19ORF66,C1R,C1S,CAMK2G,CARS,CASP7,CAV3,CBFB,CBX4,CCDC115,CCNB1IP1,CCNI,CCNL2,CCNT1,CCNY,CD81,CDK2AP1,CDK5RAP3,CDKN1A,CFB,CFD,CHFR,CIRBP,CLOCK,CNOT6L,COPS6,CORO1C,CRIM1,CRIPAK,CTBP1,CTDSP2,CTSA,CX3CR1,D2HGDH,DAB2,DDI2,DDX58,DNAJA1,DNAJB11,DNA…
GO:BP	cellular protein metabolic process	GO:0044267	2.24785e-05	4.64823	5324	733	289	17847	ABL1,ACVR2B,ADAR,ADCK1,ADPRHL2,AGO2,AIDA,ANAPC15,ANGPT1,ANKIB1,ANP32B,ANXA8,ARF4,ARHGEF2,ARRDC3,ART3,ATXN7L3,B4GALT5,BOD1L1,BRD4,BST2,BTG2,C19ORF66,CAMK2G,CARS,CAV3,CBFB,CBX4,CCDC115,CCNB1IP1,CCNI,CCNL2,CCNT1,CCNY,CD81,CDK2AP1,CDK5RAP3,CDKN1A,CHFR,CIRBP,CLOCK,CNOT6L,COPS6,CORO1C,CRIM1,CRIPAK,CTBP1,CTDSP2,CTSA,CX3CR1,D2HGDH,DAB2,DDI2,DDX58,DNAJA1,DNAJC1,DNAJC24,DNMT1,DOK5,DTX3L,DUSP1,DUSP18,DUSP23…
GO:BP	proteolysis involved in cellular protein catabolic process	GO:0051603	2.44868e-05	4.61107	734	733	64	17847	ANAPC15,ANKIB1,CAV3,CHFR,CLOCK,CTSA,DAB2,DDI2,DTX3L,EDEM3,FBXL5,FBXO27,FBXO33,FBXO6,FBXO8,FMR1,HSP90B1,HSPA5,IFI27,ISG15,KCTD10,LONP1,MVB12A,NFE2L2,NUB1,OMA1,PCNP,PDCD6IP,PPP1R11,PRKACA,PSMA3,PSMA4,PSMB8,PSMB9,PSMD11,PSME1,PTEN,RBCK1,RNF13,RNF149,RNF19A,RNF20,RSPRY1,SOCS4,SPSB3,TAF1,TBL1XR1,TRIM25,TRIM38,UBA1,UBAC2,UBE2D1,UBE2D4,UBE2L6,UBE2Z,USP10,USP11,USP16,USP18,USP32,USP8,USP9X,WAC,ZNRF3
GO:BP	regulation of signal transduction	GO:0009966	2.57538e-05	4.58916	3209	733	192	17847	ABL1,ACVR2B,ADAR,ADM,AIDA,AKR1C2,ANGPT1,ANKRD17,ARF6,ARHGAP17,ARHGAP18,ARHGAP21,ARHGAP28,ARHGEF2,ARRDC3,ATRIP,BANP,BRD4,BST2,C10ORF71,C9ORF89,CASQ2,CAV3,CBFB,CCNY,CD47,CD81,CDC42SE2,CDK5RAP3,CILP,CLOCK,CNRIP1,CRIPAK,CTHRC1,CX3CR1,DAB2,DDX5,DDX60,DHRS3,DNAJA1,DOK5,DUSP1,DUSP18,DYNLT1,EID2,EIF2AK2,EIF4A3,EPHA8,ERH,ERP29,EYA3,FAM13A,FBXO8,FGF4,FGFR1,FHL2,FNIP2,FZD7,GGNBP2,GHR,GIT2,GNA13,GOLPH3,GOLT1…
GO:BP	regulation of innate immune response	GO:0045088	2.76179e-05	4.55881	449	733	46	17847	ADAR,ANKRD17,DDX58,DDX60,HLA-B,HLA-F,HLA-G,HMGB2,HSP90B1,IFI16,IFIH1,IRAK1,IRAK2,IRF7,JAK1,KRAS,LAMP1,MAVS,MUC3A,MYD88,NLRC5,NMI,NONO,NRAS,PARP14,PARP9,PGLYRP4,PLSCR1,PRKACA,PSMA3,PSMA4,PSMB8,PSMB9,PSMD11,PSME1,RAF1,RNF135,RSAD2,SAMHD1,SERPINB9,STAT1,TBK1,UBE2D1,USP18,WDFY1,YTHDF2
GO:BP	regulation of mRNA metabolic process	GO:1903311	2.79706e-05	4.5533	332	733	38	17847	AGO2,BTG2,CCNT1,CELF2,CIRBP,CNOT6L,CWC22,DAZAP1,DCP1A,DDX5,EXOSC6,FMR1,FTO,HNRNPC,HNRNPK,HNRNPM,KHDRBS1,MBNL1,MOV10,MYD88,NSRP1,PABPN1,POLR2G,PSMA3,PSMA4,PSMB8,PSMB9,PSMD11,PSME1,RBM4,RNF20,RNPS1,TNPO1,XPO1,XRN1,YTHDF2,YWHAB,ZC3HAV1
GO:BP	antigen processing and presentation of peptide antigen via MHC class I	GO:0002474	4.96899e-05	4.30373	100	733	19	17847	CANX,HLA-B,HLA-C,HLA-F,HLA-G,ITGAV,LNPEP,PDIA3,PSMA3,PSMA4,PSMB8,PSMB9,PSMD11,PSME1,SEC13,SEC31A,SNAP23,TAP1,TAP2
GO:BP	regulation of response to biotic stimulus	GO:0002831	5.08756e-05	4.29349	520	733	50	17847	ADAR,ANKRD17,DDX58,DDX60,DTX3L,HERC5,HLA-B,HLA-F,HLA-G,HMGB2,HSP90B1,IFI16,IFIH1,IFIT1,IRAK1,IRAK2,IRF7,JAK1,KRAS,LAMP1,MAVS,MUC3A,MYD88,NLRC5,NMI,NONO,NRAS,PARP14,PARP9,PGLYRP4,PLSCR1,PRKACA,PSMA3,PSMA4,PSMB8,PSMB9,PSMD11,PSME1,RAF1,RNF135,RSAD2,SAMHD1,SERPINB9,STAT1,TBK1,TRIM38,UBE2D1,USP18,WDFY1,YTHDF2
GO:BP	regulation of response to stimulus	GO:0048583	6.34655e-05	4.19746	4370	733	244	17847	ABL1,ACTR3,ACVR2B,ADAR,ADM,AIDA,AKR1C2,ANGPT1,ANKRD17,ARF6,ARHGAP17,ARHGAP18,ARHGAP21,ARHGAP28,ARHGEF2,ARPC3,ARRDC3,ATRIP,BANP,BRD4,BST2,BTN3A2,BTN3A3,BTNL9,C10ORF71,C1R,C1S,C9ORF89,CAMK2G,CASQ2,CAV3,CBFB,CCNY,CD47,CD81,CDC42SE2,CDK5RAP3,CDKN1A,CFB,CFD,CFH,CILP,CLEC2B,CLOCK,CNRIP1,CRIPAK,CTHRC1,CX3CR1,DAB2,DDX5,DDX58,DDX60,DHRS3,DNAJA1,DOK5,DTX3L,DUSP1,DUSP18,DYNLT1,EID2,EIF2AK2,EIF4A3,EPHA8,ERH,…
GO:BP	macromolecule modification	GO:0043412	8.67015e-05	4.06197	4407	733	245	17847	ABL1,ACVR2B,ADAR,ADCK1,ADPRHL2,AIDA,ANGPT1,ANKIB1,ARF4,ARHGEF2,ARRDC3,ART3,ATXN7L3,B4GALT5,BOD1L1,BRD4,BTG2,CAMK2G,CAV3,CBFB,CBX4,CCNB1IP1,CCNI,CCNL2,CCNT1,CCNY,CD81,CDK2AP1,CDK5RAP3,CDKN1A,CHFR,CLOCK,CMTR1,COPS6,CORO1C,CRIPAK,CTBP1,CTDSP2,CX3CR1,DAB2,DDX58,DNAJA1,DNAJC24,DNMT1,DOK5,DTX3L,DUSP1,DUSP18,DUSP23,EDEM3,EHD4,EIF2AK2,EPC1,EPC2,EPHA8,ERP29,EXOSC6,EYA3,FBXL5,FBXO27,FBXO33,FBXO6,FGF4,FGFR1…
GO:BP	cellular response to organic substance	GO:0071310	0.000113998	3.9431	2788	733	169	17847	ABL1,ACTR3,ACVR2B,ADAR,AKR1C2,ANGPT1,ARF6,ARHGEF2,ARPC3,ATP6V1F,BST2,C2CD5,CAMK2G,CANX,CASP7,CASQ2,CAV3,CBFB,CD47,CDK5RAP3,CDKN1A,CHMP5,CILP,CLOCK,CMPK2,CRIPAK,CTDSP2,CX3CR1,CXCL11,DAB2,DDX5,DDX58,DNAJA1,DNAJB11,DNMT1,DOK5,DUSP1,EHD4,EID2,EIF2AK2,EIF4A3,EPHA8,FGF4,FGFR1,FGFRL1,FHL2,FZD7,GBP3,GHR,HDAC4,HDAC5,HERPUD2,HGS,HLA-B,HLA-C,HLA-F,HLA-G,HMGB2,HMOX1,HNRNPM,HSP90AA1,HSP90B1,HSPA5,HYOU1,IFI16,…
GO:BP	regulation of type I interferon production	GO:0032479	0.000134034	3.87278	128	733	21	17847	DDX58,HERC5,HMGB2,IFI16,IFIH1,IRAK1,IRF7,ISG15,MAVS,MYD88,NLRC5,NMI,RNF135,STAT1,TAX1BP1,TBK1,TRIM21,TRIM25,TRIM38,TRIM56,UBE2L6
GO:BP	response to interferon-alpha	GO:0035455	0.000142148	3.84726	21	733	9	17847	ADAR,BST2,EIF2AK2,IFIT2,IFIT3,IFITM1,IFITM2,IFITM3,MX2
GO:BP	regulation of response to stress	GO:0080134	0.000144719	3.83947	1554	733	107	17847	ABL1,ADAR,AIDA,ANKRD17,ARHGEF2,BRD4,CAMK2G,CAV3,CD47,CD81,CDKN1A,CLOCK,DDX5,DDX58,DDX60,DNAJA1,DTX3L,DUSP1,EIF2AK2,ERP29,ETS1,EYA3,FMR1,FZD7,GP1BA,HERC5,HLA-B,HLA-F,HLA-G,HMGB2,HNRNPK,HSP90AA1,HSP90B1,HSPA5,HYOU1,IER3,IFI16,IFIH1,IFIT1,IRAK1,IRAK2,IRF7,JAK1,KRAS,LAMP1,MANF,MAVS,MDK,MICU1,MUC3A,MYC,MYD88,MYH9,MYLK,NCOA7,NFE2L2,NFKBIZ,NLRC5,NMI,NONO,NRAS,OSMR,PARP1,PARP14,PARP9,PENK,PGLYRP4,PHLDB2,…
GO:BP	cellular catabolic process	GO:0044248	0.000156134	3.8065	2287	733	144	17847	ABL1,ACACB,AGO2,ALDH2,AMPD3,ANAPC15,ANKIB1,BTG2,CAV3,CCDC115,CD81,CDK5RAP3,CHFR,CHMP2A,CIRBP,CLOCK,CNOT6L,CTSA,DAB2,DCP1A,DDI2,DDX5,DTX3L,EDEM3,EIF4A3,ESD,EXOSC6,FBXL5,FBXO27,FBXO33,FBXO6,FBXO8,FEZ2,FMR1,FTO,GOT2,GPCPD1,GPSM1,GPX3,GSTM3,HADHA,HADHB,HELZ2,HERC1,HGS,HMGB2,HMGCL,HMOX1,HNRNPC,HNRNPM,HSP90AA1,HSP90B1,HSPA5,IFI16,IFI27,ISG15,ISG20,ITPA,KCTD10,LNPEP,LONP1,LUM,MOV10,MVB12A,MYD88,NFE2L2,N…
GO:BP	type I interferon production	GO:0032606	0.000176728	3.75269	130	733	21	17847	DDX58,HERC5,HMGB2,IFI16,IFIH1,IRAK1,IRF7,ISG15,MAVS,MYD88,NLRC5,NMI,RNF135,STAT1,TAX1BP1,TBK1,TRIM21,TRIM25,TRIM38,TRIM56,UBE2L6
GO:BP	modification-dependent protein catabolic process	GO:0019941	0.000221799	3.65404	643	733	56	17847	ANAPC15,ANKIB1,CAV3,CHFR,CLOCK,DAB2,DTX3L,EDEM3,FBXL5,FBXO27,FBXO33,FBXO6,FBXO8,HSP90B1,HSPA5,IFI27,ISG15,KCTD10,LONP1,MVB12A,NFE2L2,NUB1,PCNP,PPP1R11,PSMA3,PSMA4,PSMB8,PSMB9,PSMD11,PSME1,PTEN,RBCK1,RNF13,RNF149,RNF19A,RNF20,SOCS4,SPSB3,TAF1,TBL1XR1,TRIM25,TRIM38,UBA1,UBE2D1,UBE2D4,UBE2L6,UBE2Z,USP10,USP11,USP16,USP18,USP32,USP8,USP9X,WAC,ZNRF3
GO:BP	antigen processing and presentation of exogenous peptide antigen via MHC class I	GO:0042590	0.000254742	3.5939	79	733	16	17847	HLA-B,HLA-C,HLA-F,HLA-G,ITGAV,LNPEP,PDIA3,PSMA3,PSMA4,PSMB8,PSMB9,PSMD11,PSME1,SNAP23,TAP1,TAP2
GO:BP	immune response	GO:0006955	0.000262252	3.58128	2286	733	143	17847	ABL1,ACTR3,ADAR,AMPD3,ANGPT1,ANKRD17,ARHGEF2,ARL8A,ARPC3,BST2,BTN3A2,BTN3A3,BTNL9,C19ORF66,C1R,C1S,CAMK2G,CBFB,CCT8,CD47,CD81,CFB,CFD,CFH,CLEC2B,COL4A3BP,CTSA,CX3CR1,CXCL11,DDX58,DDX60,DTX3L,DYNC1H1,DYNLT1,EIF2AK2,ETS1,EXOSC6,FUCA2,GBP3,GOLGA7,HERC5,HIST1H2BK,HLA-B,HLA-C,HLA-F,HLA-G,HMGB2,HMOX1,HSP90AA1,HSP90B1,IFI16,IFI27,IFI35,IFI44,IFI44L,IFI6,IFIH1,IFIT1,IFIT2,IFIT3,IFIT5,IFITM1,IFITM2,IFITM3…
GO:BP	positive regulation of multi-organism process	GO:0043902	0.000320178	3.49461	535	733	49	17847	ADAR,AGO2,ANKRD17,CCNT1,CHMP2A,DDX58,DDX60,FMR1,HDAC4,HLA-F,HLA-G,HMGB2,HSP90B1,IFI16,IFIH1,IFIT1,IGF2R,IRAK1,IRAK2,IRF7,KPNA2,KRAS,LAMP1,MAVS,MUC3A,MYD88,NLRC5,NONO,NRAS,PARP9,PGLYRP4,PLSCR1,POLR2G,PRKACA,PSMA3,PSMA4,PSMB8,PSMB9,PSMD11,PSME1,RAF1,RRP1B,RSAD2,SP1,TBK1,TRIM21,TRIM38,UBE2D1,WDFY1
GO:BP	modification-dependent macromolecule catabolic process	GO:0043632	0.000390057	3.40887	654	733	56	17847	ANAPC15,ANKIB1,CAV3,CHFR,CLOCK,DAB2,DTX3L,EDEM3,FBXL5,FBXO27,FBXO33,FBXO6,FBXO8,HSP90B1,HSPA5,IFI27,ISG15,KCTD10,LONP1,MVB12A,NFE2L2,NUB1,PCNP,PPP1R11,PSMA3,PSMA4,PSMB8,PSMB9,PSMD11,PSME1,PTEN,RBCK1,RNF13,RNF149,RNF19A,RNF20,SOCS4,SPSB3,TAF1,TBL1XR1,TRIM25,TRIM38,UBA1,UBE2D1,UBE2D4,UBE2L6,UBE2Z,USP10,USP11,USP16,USP18,USP32,USP8,USP9X,WAC,ZNRF3
GO:BP	negative regulation of biological process	GO:0048519	0.000459607	3.33761	5596	733	294	17847	ABCG1,ABL1,ACACB,ACTC1,ACVR2B,ADAR,ADM,AGO2,AIDA,ANAPC15,ANGPT1,ANKRD13A,ANKRD17,ANP32B,ANXA8,ARF4,ARF6,ARHGAP28,ARHGEF2,ARRDC3,ASAP1,ATRIP,BANP,BEST3,BOD1L1,BST2,BTBD10,BTG2,C19ORF66,C9ORF89,CASQ2,CAV3,CBFB,CBX4,CCAR1,CCNT1,CD47,CDK5RAP3,CDKN1A,CHFR,CHMP2A,CILP,CIRBP,CLIC4,CLOCK,CNOT6L,CORO1C,CRIM1,CRIPAK,CTBP1,CTDSP2,CTHRC1,CTSA,CUX1,CX3CR1,CXCL11,DAB2,DCP1A,DDX5,DDX58,DENND5A,DHRS3,DNAJA1,DNAJ…
GO:BP	negative regulation of type I interferon production	GO:0032480	0.000539301	3.26817	46	733	12	17847	DDX58,HERC5,IFIH1,ISG15,MAVS,NLRC5,NMI,RNF135,TAX1BP1,TBK1,TRIM25,UBE2L6
GO:BP	cellular response to interferon-gamma	GO:0071346	0.000644794	3.19058	177	733	24	17847	ACTR3,CAMK2G,CD47,GBP3,HLA-B,HLA-C,HLA-F,HLA-G,IRF7,IRF9,JAK1,NLRC5,NMI,OAS1,OAS2,OAS3,OASL,PARP14,PARP9,STAT1,TRIM21,TRIM22,TRIM25,TRIM38
GO:BP	regulation of cellular catabolic process	GO:0031329	0.000673206	3.17185	838	733	66	17847	ABL1,ACACB,AGO2,ANKIB1,BTG2,CAV3,CD81,CDK5RAP3,CHFR,CIRBP,CNOT6L,CTSA,DAB2,DCP1A,DTX3L,EXOSC6,FBXL5,FEZ2,FMR1,FTO,GPSM1,HERC1,HMOX1,HNRNPC,HNRNPM,HSP90AA1,IFI16,MOV10,MYD88,NFE2L2,NUB1,PAFAH1B2,PGAM1,POLR2G,PRKAA2,PRKACA,PRKAG1,PSAP,PSMA3,PSMA4,PSMB8,PSMB9,PSMD11,PSME1,PTEN,PTTG1IP,RAB1B,RNF19A,SMCR8,SNX9,SOCS4,TAF1,TBK1,TIMP2,TNPO1,TRIM21,TRIM22,UBAC2,USP10,VPS35,WAC,XPO1,XRN1,YTHDF2,YWHAB,ZC3HA…
GO:BP	antigen processing and presentation of exogenous peptide antigen via MHC class I, TAP-dependent	GO:0002479	0.000755956	3.1215	75	733	15	17847	HLA-B,HLA-C,HLA-F,HLA-G,ITGAV,PDIA3,PSMA3,PSMA4,PSMB8,PSMB9,PSMD11,PSME1,SNAP23,TAP1,TAP2
GO:BP	organonitrogen compound catabolic process	GO:1901565	0.000787757	3.10361	1319	733	92	17847	AMPD3,ANAPC15,ANKIB1,BANP,CAV3,CCDC115,CD81,CDK5RAP3,CHFR,CLOCK,CTSA,DAB2,DDI2,DTX3L,EDEM3,FBXL5,FBXO27,FBXO33,FBXO6,FBXO8,FMR1,GOT2,HGS,HMGCL,HMOX1,HSP90AA1,HSP90B1,HSPA5,IFI27,ISG15,ITPA,KCTD10,LNPEP,LONP1,LUM,MVB12A,NFE2L2,NUB1,NUDT3,ODC1,OMA1,PCNP,PDCD6IP,PGLYRP4,PNPLA8,PPM1K,PPP1R11,PPT1,PRKACA,PSAP,PSMA3,PSMA4,PSMB8,PSMB9,PSMD11,PSME1,PTEN,PTTG1IP,RBCK1,RNF13,RNF149,RNF19A,RNF20,RSPRY1,SAMH…
GO:BP	ubiquitin-dependent protein catabolic process	GO:0006511	0.000898137	3.04666	637	733	54	17847	ANAPC15,ANKIB1,CAV3,CHFR,CLOCK,DAB2,DTX3L,EDEM3,FBXL5,FBXO27,FBXO33,FBXO6,FBXO8,HSP90B1,HSPA5,IFI27,KCTD10,MVB12A,NFE2L2,NUB1,PCNP,PPP1R11,PSMA3,PSMA4,PSMB8,PSMB9,PSMD11,PSME1,PTEN,RBCK1,RNF13,RNF149,RNF19A,RNF20,SOCS4,SPSB3,TAF1,TBL1XR1,TRIM25,TRIM38,UBA1,UBE2D1,UBE2D4,UBE2L6,UBE2Z,USP10,USP11,USP16,USP18,USP32,USP8,USP9X,WAC,ZNRF3
GO:BP	organonitrogen compound metabolic process	GO:1901564	0.00107489	2.96863	6854	733	346	17847	AASDH,ABCG1,ABHD3,ABL1,ACACB,ACVR2B,ADAR,ADCK1,ADPRHL2,AGO2,AGPAT5,AIDA,AMPD3,ANAPC15,ANGPT1,ANKIB1,ANP32B,ANXA8,ARF4,ARHGEF2,ARRDC3,ART3,ASPRV1,ATXN7L3,B4GALT5,BANP,BOD1L1,BRD4,BST2,BTG2,C19ORF66,C1R,C1S,CAMK2G,CARS,CASP7,CAV3,CBFB,CBX4,CCDC115,CCNB1IP1,CCNI,CCNL2,CCNT1,CCNY,CD81,CDK2AP1,CDK5RAP3,CDKN1A,CERS5,CFB,CFD,CHFR,CIRBP,CLOCK,CMPK2,CNOT6L,COL4A3BP,COPS6,CORO1C,CRIM1,CRIPAK,CTBP1,CTDSP2,C…
GO:BP	positive regulation of cellular process	GO:0048522	0.00124646	2.90432	5515	733	288	17847	ABCG1,ABL1,ACACB,ACTR3,ACVR2B,ADM,AGO2,AKR1C2,ANGPT1,ANKIB1,ANKRD17,ANP32B,ARF4,ARF6,ARHGEF2,ARPC3,ARRDC3,ASAP1,ATP1B4,ATXN7L3,BANP,BRD4,BST2,BTBD10,BTG2,C10ORF71,C21ORF91,C2CD5,CASQ2,CAV3,CBFB,CCAR1,CCNT1,CCNY,CCT3,CCT7,CCT8,CD151,CD47,CD81,CDC42EP3,CDC42SE2,CDK2AP1,CDK5RAP3,CDKN1A,CEP120,CHFR,CHMP2A,CHTF18,CIRBP,CLOCK,CNOT6L,CORO1C,CTBP1,CTHRC1,CUX1,CX3CR1,CXCL11,DAB2,DAZAP1,DDX5,DDX58,DDX60,DE…
GO:BP	immune system process	GO:0002376	0.00143059	2.84448	3214	733	184	17847	ABL1,ACTR3,ADAR,AGPAT5,AMPD3,ANGPT1,ANKRD17,ARHGEF2,ARL8A,ARPC3,BATF2,BSG,BST2,BTN3A2,BTN3A3,BTNL9,C19ORF66,C1R,C1S,CAMK2G,CANX,CBFB,CCT8,CD151,CD47,CD81,CDKN1A,CFB,CFD,CFH,CLEC2B,COL4A3BP,CTSA,CX3CR1,CXCL11,DDX58,DDX60,DTX3L,DUSP1,DYNC1H1,DYNLT1,EIF2AK2,ETS1,EXOSC6,FUCA2,FZD7,GBP3,GOLGA7,GOLPH3,GP1BA,HDAC4,HDAC5,HERC5,HERC6,HIST1H2BK,HLA-B,HLA-C,HLA-F,HLA-G,HMGB2,HMOX1,HOXB4,HSP90AA1,HSP90B1,IFI…
GO:BP	regulation of I-kappaB kinase/NF-kappaB signaling	GO:0043122	0.00159872	2.79623	240	733	28	17847	ABL1,ANGPT1,ANKRD17,BRD4,BST2,C9ORF89,CX3CR1,GOLT1B,HMOX1,IFIT5,IRAK1,MAVS,MIER1,MYD88,RBCK1,SECTM1,STAT1,TBK1,TERF2IP,TLE1,TNFRSF1A,TNFSF10,TRIM22,TRIM25,TRIM38,USP10,WLS,ZMYND11
GO:BP	regulation of mRNA catabolic process	GO:0061013	0.00192014	2.71667	201	733	25	17847	AGO2,BTG2,CIRBP,CNOT6L,DCP1A,EXOSC6,FMR1,FTO,HNRNPC,HNRNPM,MOV10,MYD88,POLR2G,PSMA3,PSMA4,PSMB8,PSMB9,PSMD11,PSME1,TNPO1,XPO1,XRN1,YTHDF2,YWHAB,ZC3HAV1
GO:BP	regulation of nitrogen compound metabolic process	GO:0051171	0.00319697	2.49526	5916	733	303	17847	ABCG1,ABL1,ACTR3,ACVR2B,ADAR,AGO2,AIDA,ANGPT1,ANKIB1,ANP32B,ANXA8,ARF4,ARHGEF2,ARRDC3,ATP1B4,ATXN7L3,BANP,BATF2,BBX,BOD1L1,BRD4,BST2,BTG2,C19ORF66,CAV3,CBFB,CBX4,CCAR1,CCNI,CCNL2,CCNT1,CCNY,CCT3,CCT7,CCT8,CD47,CD81,CDK2AP1,CDK5RAP3,CDKN1A,CELF2,CHFR,CHTF18,CIRBP,CLOCK,CNOT6L,CORO1C,CRIM1,CRIPAK,CTBP1,CTDSP2,CTSA,CUX1,CWC22,CX3CR1,DAB2,DAZAP1,DCP1A,DDX5,DDX58,DNAJA1,DNAJC1,DNAJC24,DNMT1,DOK5,DTX3L…
GO:BP	positive regulation of biological process	GO:0048518	0.00331439	2.4796	6290	733	319	17847	ABCG1,ABI3BP,ABL1,ACACB,ACTC1,ACTR3,ACVR2B,ADAR,ADM,AGO2,AKR1C2,ANGPT1,ANKIB1,ANKRD17,ANP32B,ARF4,ARF6,ARHGEF2,ARPC3,ARRDC3,ASAP1,ATP1B4,ATXN7L3,B4GALT5,BANP,BRD4,BST2,BTBD10,BTG2,BTN3A2,BTN3A3,BTNL9,C10ORF71,C1R,C1S,C21ORF91,C2CD5,CASQ2,CAV3,CBFB,CCAR1,CCNT1,CCNY,CCT3,CCT7,CCT8,CD151,CD47,CD81,CDC42EP3,CDC42SE2,CDK2AP1,CDK5RAP3,CDKN1A,CEP120,CFB,CFD,CFH,CHFR,CHMP2A,CHTF18,CIRBP,CLOCK,CNOT6L,CORO…
GO:BP	cellular response to chemical stimulus	GO:0070887	0.00345474	2.46158	3364	733	189	17847	ABL1,ACTR3,ACVR2B,ADAR,ADPRHL2,AKR1C2,ANGPT1,ARF6,ARHGEF2,ARPC3,ATP6V1F,BST2,C2CD5,CAMK2G,CANX,CASP7,CASQ2,CAV3,CBFB,CCDC115,CD47,CDK5RAP3,CDKN1A,CHMP5,CILP,CLIC4,CLOCK,CMPK2,CRIPAK,CTDSP2,CX3CR1,CXCL11,DAB2,DDI2,DDX5,DDX58,DNAJA1,DNAJB11,DNMT1,DOK5,DUSP1,EHD4,EID2,EIF2AK2,EIF4A3,EPHA8,ESD,ETS1,FGF4,FGFR1,FGFRL1,FHL2,FMR1,FZD7,GBP3,GHR,GPX3,GPX8,GSTM3,HDAC4,HDAC5,HERPUD2,HGS,HLA-B,HLA-C,HLA-F,HLA…
GO:BP	response to interferon-beta	GO:0035456	0.00360223	2.44343	29	733	9	17847	BST2,C19ORF66,IFI16,IFITM1,IFITM2,IFITM3,PLSCR1,STAT1,XAF1
GO:BP	macromolecule metabolic process	GO:0043170	0.00363716	2.43924	9523	733	453	17847	ABCG1,ABL1,ACACB,ACTC1,ACTR3,ACVR2B,ADAR,ADCK1,ADM,ADPRHL2,AGO2,AIDA,ANAPC15,ANGPT1,ANKIB1,ANKRD13A,ANKRD17,ANP32B,ANXA8,ARF4,ARHGEF2,ARRDC3,ART3,ASPRV1,ATP1B4,ATRIP,ATXN7L3,B4GALT5,BANP,BATF2,BBX,BOD1L1,BRD4,BST2,BTG2,C19ORF66,C1R,C1S,CAMK2G,CARS,CASP7,CAV3,CBFB,CBX4,CCAR1,CCDC115,CCNB1IP1,CCNI,CCNL2,CCNT1,CCNY,CCT3,CCT7,CCT8,CD81,CDK2AP1,CDK5RAP3,CDKN1A,CELF2,CFB,CFD,CHFR,CHMP5,CHTF18,CILP,CIRB…
GO:BP	signal transduction	GO:0007165	0.00410065	2.38715	6210	733	315	17847	ABL1,ACTR3,ACVR2B,ADAR,ADM,AGO2,AIDA,AKR1C2,ANGPT1,ANGPTL1,ANKRD17,ARF4,ARF6,ARHGAP17,ARHGAP18,ARHGAP21,ARHGAP28,ARHGEF2,ARPC3,ARRDC3,ATP6V1F,ATRIP,BANP,BRD4,BSG,BST2,BTG2,BTN3A2,BTN3A3,BTNL9,C10ORF71,C2CD5,C9ORF89,CAMK2G,CANX,CASQ2,CAV3,CBFB,CCNY,CD47,CD81,CDC42EP3,CDC42SE2,CDK5RAP3,CDKN1A,CFD,CILP,CLOCK,CNOT6L,CNRIP1,COL4A3BP,CORO1C,CRIM1,CRIPAK,CTDSP2,CTHRC1,CTNNAL1,CX3CR1,CXCL11,DAB2,DDX5,DDX…
GO:BP	intracellular signal transduction	GO:0035556	0.0041611	2.38079	2880	733	166	17847	ABL1,ADM,AIDA,AKR1C2,ANGPT1,ANKRD17,ARF6,ARHGAP17,ARHGAP18,ARHGAP21,ARHGAP28,ARHGEF2,ARRDC3,ATRIP,BANP,BRD4,BST2,BTG2,C10ORF71,C9ORF89,CASQ2,CAV3,CD81,CDC42EP3,CDC42SE2,CDK5RAP3,CDKN1A,CNOT6L,CTNNAL1,CX3CR1,CXCL11,DDX5,DDX58,DDX60,DEF8,DGKZ,DNAJA1,DNMT1,DOK5,DUSP1,DUSP18,DYNLT1,EIF2AK2,EPHA8,ERP29,FAM13A,FBXO8,FGF4,FGFR1,FHL2,FNIP2,FZD7,GHR,GNA13,GOLPH3,GOLT1B,HDAC4,HGS,HLA-G,HMOX1,HNRNPK,HSP90AA…
GO:BP	organic substance catabolic process	GO:1901575	0.00474025	2.3242	2216	733	134	17847	ACACB,AGO2,ALDH2,AMPD3,ANAPC15,ANKIB1,BANP,BTG2,CAV3,CCDC115,CD81,CDK5RAP3,CHFR,CIRBP,CLOCK,CNOT6L,CTSA,DAB2,DCP1A,DDI2,DDX5,DTX3L,EDEM3,EIF4A3,ESD,EXOSC6,FBXL5,FBXO27,FBXO33,FBXO6,FBXO8,FMR1,FTO,FUCA2,GOT2,GPCPD1,HADHA,HADHB,HDAC4,HELZ2,HGS,HMGB2,HMGCL,HMOX1,HNRNPC,HNRNPM,HSP90AA1,HSP90B1,HSPA5,IFI27,INPP5A,ISG15,ISG20,ITPA,KCTD10,LNPEP,LONP1,LUM,MOV10,MVB12A,MYD88,NFE2L2,NUB1,NUDT3,NUDT5,OAS2,O…
GO:BP	regulation of catabolic process	GO:0009894	0.00511103	2.29149	998	733	72	17847	ABL1,ACACB,AGO2,ANKIB1,BANP,BTG2,CAV3,CD81,CDK5RAP3,CHFR,CIRBP,CNOT6L,CTSA,DAB2,DCP1A,DTX3L,EXOSC6,FBXL5,FEZ2,FMR1,FTO,GPSM1,HDAC4,HERC1,HGS,HMOX1,HNRNPC,HNRNPM,HSP90AA1,IFI16,MOV10,MYD88,NFE2L2,NUB1,ODC1,PAFAH1B2,PGAM1,POLR2G,PRKAA2,PRKACA,PRKAG1,PSAP,PSMA3,PSMA4,PSMB8,PSMB9,PSMD11,PSME1,PTEN,PTTG1IP,RAB1B,RNF19A,SEC13,SMCR8,SNX9,SOCS4,TAF1,TBK1,TIMP2,TNPO1,TRIM21,TRIM22,UBAC2,USP10,USP8,VPS35,W…
GO:BP	regulation of protein metabolic process	GO:0051246	0.00529183	2.27639	2870	733	165	17847	ABCG1,ABL1,ACVR2B,ADAR,AGO2,AIDA,ANGPT1,ANKIB1,ANP32B,ANXA8,ARHGEF2,ARRDC3,BANP,BOD1L1,BRD4,BST2,BTG2,C19ORF66,CAV3,CCNI,CCNL2,CCNT1,CCNY,CD81,CDK2AP1,CDK5RAP3,CDKN1A,CHFR,CIRBP,CNOT6L,CORO1C,CRIM1,CRIPAK,CTBP1,CTDSP2,CTSA,CX3CR1,DAB2,DNAJA1,DNAJC1,DNAJC24,DNMT1,DOK5,DTX3L,DUSP1,DUSP18,EHD4,EIF2AK2,EIF4A3,EIF4B,EPHA8,ERP29,FBXL5,FGF4,FGFR1,FMR1,FNIP2,FTO,FZD7,GGNBP2,GHR,HDAC4,HERC5,HGS,HMOX1,HNRN…
GO:BP	regulation of defense response	GO:0031347	0.00634453	2.1976	803	733	61	17847	ADAR,ANKRD17,BRD4,CD47,CD81,CLOCK,DDX58,DDX60,DTX3L,ETS1,HERC5,HLA-B,HLA-F,HLA-G,HMGB2,HSP90B1,IFI16,IFIH1,IFIT1,IRAK1,IRAK2,IRF7,JAK1,KRAS,LAMP1,MAVS,MDK,MUC3A,MYD88,NFKBIZ,NLRC5,NMI,NONO,NRAS,OSMR,PARP14,PARP9,PENK,PGLYRP4,PLSCR1,PRKACA,PSMA3,PSMA4,PSMB8,PSMB9,PSMD11,PSME1,RAF1,RNF135,RSAD2,SAMHD1,SERPINB9,STAT1,TBK1,TNFRSF1A,TRIM38,UBE2D1,USP18,VPS35,WDFY1,YTHDF2
GO:BP	cellular macromolecule metabolic process	GO:0044260	0.00686022	2.16366	8362	733	404	17847	ABL1,ACTR3,ACVR2B,ADAR,ADCK1,ADM,ADPRHL2,AGO2,AIDA,ANAPC15,ANGPT1,ANKIB1,ANKRD13A,ANKRD17,ANP32B,ANXA8,ARF4,ARHGEF2,ARRDC3,ART3,ATP1B4,ATRIP,ATXN7L3,B4GALT5,BANP,BATF2,BBX,BOD1L1,BRD4,BST2,BTG2,C19ORF66,CAMK2G,CARS,CAV3,CBFB,CBX4,CCAR1,CCDC115,CCNB1IP1,CCNI,CCNL2,CCNT1,CCNY,CCT3,CCT7,CCT8,CD81,CDK2AP1,CDK5RAP3,CDKN1A,CHFR,CHMP5,CHTF18,CIRBP,CLOCK,CMTR1,CNOT6L,COPS6,CORO1C,CPSF3,CRIM1,CRIPAK,CTBP1…
GO:BP	regulation of cell communication	GO:0010646	0.00691659	2.16011	3595	733	198	17847	ABL1,ACVR2B,ADAR,ADM,AIDA,AKR1C2,ANGPT1,ANKRD17,ARF6,ARHGAP17,ARHGAP18,ARHGAP21,ARHGAP28,ARHGEF2,ARRDC3,ATRIP,BANP,BRD4,BST2,C10ORF71,C9ORF89,CASQ2,CAV3,CBFB,CCNY,CD47,CD81,CDC42SE2,CDK5RAP3,CILP,CLOCK,CNRIP1,CRIPAK,CTHRC1,CX3CR1,DAB2,DDX5,DDX60,DGKZ,DHRS3,DNAJA1,DOK5,DUSP1,DUSP18,DYNLT1,EID2,EIF2AK2,EIF4A3,EPHA8,ERH,ERP29,EYA3,FAM13A,FBXO8,FGF4,FGFR1,FHL2,FMR1,FNIP2,FZD7,GGNBP2,GHR,GIT2,GNA13,GO…
GO:BP	positive regulation of defense response	GO:0031349	0.00734111	2.13424	511	733	44	17847	ANKRD17,CD47,CD81,CLOCK,DDX58,DDX60,ETS1,HLA-F,HLA-G,HMGB2,HSP90B1,IFI16,IFIH1,IRAK1,IRAK2,IRF7,KRAS,LAMP1,MAVS,MDK,MUC3A,MYD88,NFKBIZ,NLRC5,NONO,NRAS,OSMR,PARP9,PENK,PGLYRP4,PLSCR1,PRKACA,PSMA3,PSMA4,PSMB8,PSMB9,PSMD11,PSME1,RAF1,RSAD2,TBK1,TNFRSF1A,UBE2D1,WDFY1
GO:BP	response to external stimulus	GO:0009605	0.00757192	2.12079	2887	733	165	17847	ABL1,ACACB,ACTR3,ADAR,ADM,ANGPT1,ANKRD17,ARHGEF2,BATF2,BRD4,BSG,BST2,BTG2,C19ORF66,C1S,CAMK2G,CAV3,CD47,CD81,CDKN1A,CFB,CFD,CFH,CHMP5,CLOCK,CMPK2,CX3CR1,CXCL11,DDX58,DDX60,DOK5,DTX3L,DUSP1,EIF2AK2,EPHA8,ETS1,FEZ2,FGF4,FGFR1,FMR1,FUCA2,GBP3,GHR,GNG12,GP1BA,HDAC4,HDAC5,HERC5,HERC6,HIST1H2BK,HLA-B,HLA-C,HLA-F,HLA-G,HMGB2,HMGCL,HMOX1,HSP90B1,HSPA5,IFI16,IFI27,IFI35,IFI44,IFI44L,IFI6,IFIH1,IFIT1,IFIT2…
GO:BP	I-kappaB kinase/NF-kappaB signaling	GO:0007249	0.0080467	2.09438	275	733	29	17847	ABL1,ANGPT1,ANKRD17,BRD4,BST2,C9ORF89,CX3CR1,GOLT1B,HMOX1,IFIT5,IRAK1,IRAK2,MAVS,MIER1,MYD88,RBCK1,SECTM1,STAT1,TBK1,TERF2IP,TLE1,TNFRSF1A,TNFSF10,TRIM22,TRIM25,TRIM38,USP10,WLS,ZMYND11
GO:BP	positive regulation of cellular catabolic process	GO:0031331	0.00873451	2.05876	368	733	35	17847	AGO2,ANKIB1,BTG2,CAV3,CD81,CHFR,CNOT6L,DAB2,DTX3L,FBXL5,FMR1,FTO,GPSM1,HMOX1,HSP90AA1,MOV10,NFE2L2,NUB1,PAFAH1B2,POLR2G,PRKAA2,PTEN,PTTG1IP,RNF19A,SMCR8,SNX9,SOCS4,TAF1,TBK1,TRIM21,TRIM22,VPS35,WAC,YTHDF2,ZC3HAV1
GO:BP	regulation of signaling	GO:0023051	0.0101062	1.99541	3637	733	199	17847	ABL1,ACVR2B,ADAR,ADM,AIDA,AKR1C2,ANGPT1,ANKRD17,ARF6,ARHGAP17,ARHGAP18,ARHGAP21,ARHGAP28,ARHGEF2,ARRDC3,ATRIP,BANP,BRD4,BST2,C10ORF71,C9ORF89,CASQ2,CAV3,CBFB,CCNY,CD47,CD81,CDC42SE2,CDK5RAP3,CHMP5,CILP,CLOCK,CNRIP1,CRIPAK,CTHRC1,CX3CR1,DAB2,DDX5,DDX60,DGKZ,DHRS3,DNAJA1,DOK5,DUSP1,DUSP18,DYNLT1,EID2,EIF2AK2,EIF4A3,EPHA8,ERH,ERP29,EYA3,FAM13A,FBXO8,FGF4,FGFR1,FHL2,FMR1,FNIP2,FZD7,GGNBP2,GHR,GIT2,GN…
GO:BP	cell surface receptor signaling pathway	GO:0007166	0.0129592	1.88742	3128	733	175	17847	ABL1,ACTR3,ACVR2B,ADAR,AGO2,ANGPT1,ANGPTL1,ARF4,ARHGEF2,ARPC3,ATP6V1F,BSG,BST2,BTN3A2,BTN3A3,BTNL9,C2CD5,CAMK2G,CANX,CAV3,CBFB,CCNY,CD47,CD81,CDKN1A,CFD,CILP,CRIM1,CTHRC1,CX3CR1,CXCL11,DAB2,DDX5,DOK5,DTX3L,EID2,EIF4A3,EPHA8,ERH,EYA3,FGF4,FGFR1,FGFRL1,FMR1,FZD7,GGNBP2,GHR,GP1BA,HEY1,HGS,HLA-B,HLA-C,HLA-F,HLA-G,HMGB2,HMOX1,HNRNPM,HSP90AA1,HSP90B1,HSPA5,IFI27,IFI35,IFI6,IFIT1,IFIT2,IFIT3,IFITM1,IFIT…
GO:BP	regulation of cellular metabolic process	GO:0031323	0.0132057	1.87924	6285	733	315	17847	ABCG1,ABL1,ACACB,ACTR3,ACVR2B,ADAR,ADM,AGO2,AIDA,ANGPT1,ANKIB1,ANKRD13A,ANKRD17,ANP32B,ANXA8,ARF4,ARHGEF2,ARRDC3,ATP1B4,ATXN7L3,BANP,BATF2,BBX,BOD1L1,BRD4,BST2,BTBD10,BTG2,C19ORF66,CAV3,CBFB,CBX4,CCAR1,CCNI,CCNL2,CCNT1,CCNY,CCT3,CCT7,CCT8,CD47,CD81,CDK2AP1,CDK5RAP3,CDKN1A,CELF2,CHFR,CHMP5,CHTF18,CIRBP,CLOCK,CNOT6L,CORO1C,CRIM1,CRIPAK,CTBP1,CTDSP2,CTSA,CUX1,CWC22,CX3CR1,DAB2,DAZAP1,DCP1A,DDX5,DDX5…
GO:BP	antigen processing and presentation of exogenous peptide antigen via MHC class I, TAP-independent	GO:0002480	0.0138647	1.85809	8	733	5	17847	HLA-B,HLA-C,HLA-F,HLA-G,LNPEP
GO:BP	positive regulation of innate immune response	GO:0045089	0.0149348	1.8258	377	733	35	17847	ANKRD17,DDX58,DDX60,HLA-F,HLA-G,HMGB2,HSP90B1,IFI16,IFIH1,IRAK1,IRAK2,IRF7,KRAS,LAMP1,MAVS,MUC3A,MYD88,NLRC5,NONO,NRAS,PARP9,PGLYRP4,PLSCR1,PRKACA,PSMA3,PSMA4,PSMB8,PSMB9,PSMD11,PSME1,RAF1,RSAD2,TBK1,UBE2D1,WDFY1
GO:BP	positive regulation of I-kappaB kinase/NF-kappaB signaling	GO:0043123	0.0166316	1.77907	184	733	22	17847	ABL1,ANKRD17,BRD4,BST2,CX3CR1,GOLT1B,HMOX1,IFIT5,IRAK1,MAVS,MIER1,MYD88,RBCK1,SECTM1,TBK1,TERF2IP,TNFRSF1A,TNFSF10,TRIM22,TRIM25,TRIM38,WLS
GO:BP	negative regulation of macromolecule metabolic process	GO:0010605	0.0166641	1.77822	2990	733	168	17847	ABL1,ACACB,ACVR2B,ADAR,AGO2,AIDA,ANGPT1,ANKRD13A,ANXA8,BANP,BOD1L1,BST2,BTG2,C19ORF66,CAV3,CBFB,CBX4,CCAR1,CCNT1,CDK5RAP3,CDKN1A,CILP,CIRBP,CLOCK,CNOT6L,CORO1C,CRIM1,CRIPAK,CTBP1,CTDSP2,CTSA,CUX1,DAB2,DCP1A,DDX5,DNAJA1,DNAJC1,DNMT1,DTX3L,DUSP1,DUSP18,EID2,EIF2AK2,EIF4A3,EPC1,ERP29,EXOSC6,FGFR1,FHL2,FMR1,FNIP2,FTO,GATAD2B,GGNBP2,HDAC4,HDAC5,HELZ2,HEY1,HIRA,HMBOX1,HMGB2,HNRNPC,HNRNPK,HNRNPM,HOXB4,I…
GO:BP	regulation of intracellular signal transduction	GO:1902531	0.0177315	1.75125	1881	733	115	17847	ABL1,AIDA,AKR1C2,ANGPT1,ANKRD17,ARF6,ARHGAP17,ARHGAP18,ARHGAP21,ARHGAP28,ARHGEF2,ARRDC3,ATRIP,BANP,BRD4,BST2,C10ORF71,C9ORF89,CASQ2,CAV3,CD81,CDC42SE2,CDK5RAP3,CX3CR1,DDX5,DDX60,DNAJA1,DOK5,DUSP1,DUSP18,DYNLT1,EIF2AK2,EPHA8,ERP29,FAM13A,FBXO8,FGF4,FGFR1,FHL2,FNIP2,FZD7,GHR,GNA13,GOLPH3,GOLT1B,HGS,HLA-G,HMOX1,HNRNPK,HSP90AA1,HYOU1,IER3,IFIT5,IGFBP5,IRAK1,IRAK2,KAT6A,KCTD10,KRAS,LMCD1,MAVS,MIER1,MY…
GO:BP	regulation of cellular process	GO:0050794	0.0182091	1.73971	11018	733	508	17847	ABCG1,ABL1,ACACB,ACTC1,ACTR3,ACVR2B,ADAR,ADM,AGO2,AIDA,AKAP2,AKR1C2,ANAPC15,ANGPT1,ANGPTL1,ANKIB1,ANKRD13A,ANKRD17,ANP32B,ANXA8,ARF4,ARF6,ARHGAP17,ARHGAP18,ARHGAP21,ARHGAP28,ARHGEF2,ARPC3,ARRDC3,ASAP1,ATP1B4,ATP6V1F,ATRIP,ATXN7L3,BANP,BATF2,BBX,BOD1L1,BRD4,BSG,BST2,BTBD10,BTG2,BTN3A2,BTN3A3,BTNL9,C10ORF71,C19ORF66,C21ORF91,C2CD5,C9ORF89,CABLES2,CAMK2G,CANX,CARD6,CASQ2,CAV3,CBFB,CBX4,CCAR1,CCNI,CC…
GO:BP	antigen processing and presentation of exogenous peptide antigen	GO:0002478	0.019288	1.71471	172	733	21	17847	CANX,DYNC1H1,HLA-B,HLA-C,HLA-F,HLA-G,ITGAV,KIFAP3,LNPEP,PDIA3,PSMA3,PSMA4,PSMB8,PSMB9,PSMD11,PSME1,SEC13,SEC31A,SNAP23,TAP1,TAP2
GO:BP	regulation of primary metabolic process	GO:0080090	0.0249678	1.60262	6094	733	305	17847	ABCG1,ABL1,ACACB,ACTR3,ACVR2B,ADAR,ADM,AGO2,AIDA,ANGPT1,ANKIB1,ANP32B,ANXA8,ARF4,ARHGEF2,ARRDC3,ATP1B4,ATXN7L3,BANP,BATF2,BBX,BOD1L1,BRD4,BST2,BTG2,C19ORF66,CAV3,CBFB,CBX4,CCAR1,CCNI,CCNL2,CCNT1,CCNY,CCT3,CCT7,CCT8,CD81,CDK2AP1,CDK5RAP3,CDKN1A,CELF2,CHFR,CHTF18,CIRBP,CLOCK,CNOT6L,CORO1C,CRIM1,CRIPAK,CTBP1,CTDSP2,CTSA,CUX1,CWC22,CX3CR1,DAB2,DAZAP1,DCP1A,DDX5,DDX58,DGKZ,DNAJA1,DNAJC1,DNAJC24,DNMT1,…
GO:BP	protein ADP-ribosylation	GO:0006471	0.0261536	1.58247	36	733	9	17847	ARF4,ART3,PARP1,PARP10,PARP12,PARP14,PARP9,WARS,ZC3HAV1
GO:BP	mRNA metabolic process	GO:0016071	0.0275505	1.55987	860	733	62	17847	ADAR,AGO2,BTG2,CCAR1,CCNT1,CELF2,CIRBP,CMTR1,CNOT6L,CPSF3,CWC22,DAZAP1,DCP1A,DDX5,DHX15,EIF4A3,EXOSC6,FMR1,FTO,HELZ2,HNRNPC,HNRNPK,HNRNPM,KHDRBS1,LUC7L,MBNL1,MOV10,MYD88,NONO,NSRP1,PABPN1,PAN3,PHF5A,PLRG1,PNRC2,POLR2G,PRKACA,PRMT9,PRPF40B,PSMA3,PSMA4,PSMB8,PSMB9,PSMD11,PSME1,RBM22,RBM4,RNF20,RNH1,RNPS1,RRP1B,SF3B2,SLU7,SNRPF,TNPO1,XPO1,XRN1,YTHDF2,YWHAB,ZC3HAV1,ZNF830,ZRANB2
GO:BP	regulation of response to cytokine stimulus	GO:0060759	0.0279014	1.55437	190	733	22	17847	ADAR,ANGPT1,CBFB,DDX58,IFIH1,IRAK1,IRAK2,IRF7,JAK1,MAVS,NLRC5,PARP14,PARP9,RBCK1,SAMHD1,SH2B3,STAT1,TAX1BP1,TBK1,TNFRSF1A,USP18,YTHDF2
GO:BP	nitrogen compound metabolic process	GO:0006807	0.0280541	1.552	10039	733	468	17847	AASDH,ABCG1,ABHD3,ABL1,ACACB,ACTR3,ACVR2B,ADAR,ADCK1,ADPRHL2,AGO2,AGPAT5,AIDA,AKR1C2,AMPD3,ANAPC15,ANGPT1,ANKIB1,ANP32B,ANXA8,ARF4,ARHGEF2,ARRDC3,ART3,ASPRV1,ATP1B4,ATRIP,ATXN7L3,B4GALT5,BANP,BATF2,BBX,BOD1L1,BRD4,BST2,BTG2,C19ORF66,C1R,C1S,CAMK2G,CARS,CASP7,CAV3,CBFB,CBX4,CCAR1,CCDC115,CCNB1IP1,CCNI,CCNL2,CCNT1,CCNY,CCT3,CCT7,CCT8,CD47,CD81,CDK2AP1,CDK5RAP3,CDKN1A,CELF2,CERS5,CFB,CFD,CHFR,CHTF18…
GO:BP	intracellular transport	GO:0046907	0.0292954	1.5332	1759	733	108	17847	ABCG1,ACACB,AFTPH,ANGPT1,ANP32B,ANXA8,ARF4,ARF6,ARHGAP21,ARHGEF2,ARL5B,ARL8A,C2CD5,CD81,CDKN1A,CEP120,CHMP1B,CHMP2A,CHMP5,COL4A3BP,CORO1C,CPSF3,CTAGE15,CTSA,DAB2,DENND5A,DTX3L,DYNC1H1,DYNLT1,EHD4,EIF4A3,ERP29,F8,GOLGA7,GPIHBP1,GRASP,HGS,HMGCL,HMOX1,HSP90AA1,HSP90B1,HSPA5,HYOU1,IFI27,IFIT1,IFT122,IFT43,IPO8,JUP,KHDRBS1,KIFAP3,KPNA2,LAMP1,MAVS,MLPH,MVB12A,MX2,MYH10,NAPB,NXF1,PABPN1,PAN3,PKIG,PREPL,…
GO:BP	regulation of macromolecule metabolic process	GO:0060255	0.0326285	1.4864	6346	733	315	17847	ABCG1,ABL1,ACACB,ACTC1,ACTR3,ACVR2B,ADAR,AGO2,AIDA,ANGPT1,ANKIB1,ANKRD13A,ANKRD17,ANP32B,ANXA8,ARF4,ARHGEF2,ARRDC3,ATP1B4,ATXN7L3,BANP,BATF2,BBX,BOD1L1,BRD4,BST2,BTG2,C19ORF66,CAV3,CBFB,CBX4,CCAR1,CCNI,CCNL2,CCNT1,CCNY,CCT3,CCT7,CCT8,CD81,CDK2AP1,CDK5RAP3,CDKN1A,CELF2,CHFR,CHMP5,CHTF18,CILP,CIRBP,CLOCK,CNOT6L,CORO1C,CRIM1,CRIPAK,CTBP1,CTDSP2,CTSA,CUX1,CWC22,CX3CR1,DAB2,DAZAP1,DCP1A,DDX5,DDX58,DNA…
GO:BP	proteolysis	GO:0006508	0.0350103	1.4558	1807	733	110	17847	ANAPC15,ANKIB1,ANP32B,ANXA8,ASPRV1,ATXN7L3,BST2,C1R,C1S,CASP7,CAV3,CFB,CFD,CHFR,CLOCK,COPS6,CRIM1,CTSA,DAB2,DDI2,DDX58,DNAJC1,DPP3,DTX3L,EDEM3,FBXL5,FBXO27,FBXO33,FBXO6,FBXO8,FMR1,HGS,HSP90B1,HSPA5,IFI16,IFI27,IFI6,IFIH1,ISG15,KCTD10,LAP3,LDLRAD3,LNPEP,LONP1,MTCH1,MVB12A,MYC,MYH9,NFE2L2,NUB1,OMA1,OTUD6B,PARP1,PCNP,PDCD6IP,PDIA3,PM20D1,PM20D2,PPP1R11,PRCP,PREPL,PRKACA,PRNP,PSMA3,PSMA4,PSMB8,PSMB9,…
GO:BP	regulation of mRNA stability	GO:0043488	0.0358487	1.44553	179	733	21	17847	CIRBP,CNOT6L,DCP1A,EXOSC6,FMR1,FTO,HNRNPC,HNRNPM,MOV10,MYD88,PSMA3,PSMA4,PSMB8,PSMB9,PSMD11,PSME1,TNPO1,XPO1,XRN1,YTHDF2,YWHAB
GO:BP	antigen processing and presentation of exogenous antigen	GO:0019884	0.0358487	1.44553	179	733	21	17847	CANX,DYNC1H1,HLA-B,HLA-C,HLA-F,HLA-G,ITGAV,KIFAP3,LNPEP,PDIA3,PSMA3,PSMA4,PSMB8,PSMB9,PSMD11,PSME1,SEC13,SEC31A,SNAP23,TAP1,TAP2
GO:BP	catabolic process	GO:0009056	0.0362135	1.44113	2665	733	151	17847	ABL1,ACACB,AGO2,ALDH2,AMPD3,ANAPC15,ANKIB1,BANP,BTG2,CAV3,CCDC115,CD81,CDK5RAP3,CHFR,CHMP2A,CIRBP,CLOCK,CNOT6L,CTSA,DAB2,DCP1A,DDI2,DDX5,DTX3L,EDEM3,EIF4A3,ESD,EXOSC6,FBXL5,FBXO27,FBXO33,FBXO6,FBXO8,FEZ2,FMR1,FTO,FUCA2,GOT2,GPCPD1,GPSM1,GPX3,GSTM3,HADHA,HADHB,HDAC4,HELZ2,HERC1,HGS,HMGB2,HMGCL,HMOX1,HNRNPC,HNRNPM,HSP90AA1,HSP90B1,HSPA5,IFI16,IFI27,INPP5A,ISG15,ISG20,ITPA,KCTD10,LNPEP,LONP1,LUM,MOV…
GO:BP	positive regulation of response to biotic stimulus	GO:0002833	0.0431896	1.36462	396	733	35	17847	ANKRD17,DDX58,DDX60,HLA-F,HLA-G,HMGB2,HSP90B1,IFI16,IFIH1,IRAK1,IRAK2,IRF7,KRAS,LAMP1,MAVS,MUC3A,MYD88,NLRC5,NONO,NRAS,PARP9,PGLYRP4,PLSCR1,PRKACA,PSMA3,PSMA4,PSMB8,PSMB9,PSMD11,PSME1,RAF1,RSAD2,TBK1,UBE2D1,WDFY1
GO:BP	negative regulation of nitrogen compound metabolic process	GO:0051172	0.0486131	1.31325	2467	733	141	17847	ABL1,ACVR2B,ADAR,AGO2,AIDA,ANGPT1,ANXA8,BANP,BOD1L1,BST2,BTG2,C19ORF66,CAV3,CBFB,CBX4,CCAR1,CCNT1,CDK5RAP3,CDKN1A,CIRBP,CLOCK,CNOT6L,CORO1C,CRIM1,CRIPAK,CTBP1,CTDSP2,CTSA,CUX1,DAB2,DDX5,DNAJA1,DNAJC1,DNMT1,DTX3L,DUSP1,DUSP18,EID2,EIF2AK2,EIF4A3,EPC1,FGFR1,FHL2,FMR1,FNIP2,FTO,GATAD2B,GGNBP2,HDAC4,HDAC5,HEY1,HIRA,HMBOX1,HMGB2,HNRNPC,HNRNPK,HOXB4,IFI16,IFI27,IFI6,IGFBP5,IRF2BPL,IRF7,ISG15,ITGAV,KAT6…
GO:CC	intracellular part	GO:0044424	3.16923e-17	16.499	14552	771	691	18842	ABCG1,ABL1,ACACB,ACTC1,ACTR3,ACVR2B,ADAR,ADM,ADPRHL2,AFTPH,AGO2,AGPAT5,AHSA1,AIDA,AKR1C2,ALDH2,AMPD3,ANAPC15,ANKIB1,ANKRD13A,ANKRD17,ANP32B,ANTXR2,ANXA8,APOOL,ARF4,ARF6,ARHGAP17,ARHGAP18,ARHGAP21,ARHGAP28,ARHGEF2,ARL5B,ARL8A,ARMCX1,ARPC3,ARPP21,ARRDC3,ASAP1,ATP1B4,ATP6V1F,ATP9A,ATRIP,ATXN7L3,B4GALT5,BANP,BATF2,BBX,BOD1L1,BRD4,BSG,BST2,BTBD10,BTG2,BZW1,C10ORF71,C11ORF54,C19ORF66,C1ORF131,C2CD5,C9O…
GO:CC	intracellular	GO:0005622	4.50521e-17	16.3463	14596	771	692	18842	ABCG1,ABL1,ACACB,ACTC1,ACTR3,ACVR2B,ADAR,ADM,ADPRHL2,AFTPH,AGO2,AGPAT5,AHSA1,AIDA,AKR1C2,ALDH2,AMPD3,ANAPC15,ANKIB1,ANKRD13A,ANKRD17,ANP32B,ANTXR2,ANXA8,APOOL,ARF4,ARF6,ARHGAP17,ARHGAP18,ARHGAP21,ARHGAP28,ARHGEF2,ARL5B,ARL8A,ARMCX1,ARPC3,ARPP21,ARRDC3,ASAP1,ATP1B4,ATP6V1F,ATP9A,ATRIP,ATXN7L3,B4GALT5,BANP,BATF2,BBX,BOD1L1,BRD4,BSG,BST2,BTBD10,BTG2,BZW1,C10ORF71,C11ORF54,C19ORF66,C1ORF131,C2CD5,C9O…
GO:CC	cytosol	GO:0005829	1.65143e-16	15.7821	5086	771	320	18842	ABL1,ACACB,ACTC1,ACTR3,AFTPH,AGO2,AHSA1,AKR1C2,AMPD3,ANAPC15,ANXA8,ARF4,ARF6,ARHGAP17,ARHGAP18,ARHGAP21,ARHGAP28,ARHGEF2,ARPC3,ASAP1,ATP6V1F,BBX,BRD4,BST2,BTG2,C19ORF66,C2CD5,C9ORF89,CAMK2G,CARS,CASP7,CCT3,CCT7,CCT8,CD151,CDC42EP3,CDK2AP1,CDK5RAP3,CDKN1A,CHMP1B,CHMP2A,CHMP5,CHTF18,CLIC4,CLOCK,CMTR1,CNN3,CNOT6L,COL4A3BP,COMMD8,COPS6,CTNNAL1,CUX1,CWC22,DAB2,DAZAP1,DCP1A,DDI2,DDX58,DDX60,DENND5A,DEN…
GO:CC	cytoplasmic part	GO:0044444	4.06001e-15	14.3915	9760	771	514	18842	ABCG1,ABL1,ACACB,ACTC1,ACTR3,ADPRHL2,AFTPH,AGO2,AGPAT5,AHSA1,AKR1C2,ALDH2,AMPD3,ANAPC15,ANKRD13A,ANTXR2,ANXA8,APOOL,ARF4,ARF6,ARHGAP17,ARHGAP18,ARHGAP21,ARHGAP28,ARHGEF2,ARL5B,ARL8A,ARMCX1,ARPC3,ARRDC3,ASAP1,ATP6V1F,ATP9A,B4GALT5,BBX,BRD4,BSG,BST2,BTG2,C10ORF71,C19ORF66,C2CD5,C9ORF89,CAMK2G,CANX,CARS,CASP7,CASQ2,CAV3,CCAR1,CCDC115,CCDC14,CCNY,CCT3,CCT7,CCT8,CD151,CD47,CDC42EP3,CDK2AP1,CDK5RAP3,CD…
GO:CC	intracellular organelle	GO:0043229	6.79228e-14	13.168	12818	771	624	18842	ABCG1,ABL1,ACACB,ACTC1,ACTR3,ADAR,ADPRHL2,AFTPH,AGO2,AGPAT5,AHSA1,ALDH2,AMPD3,ANAPC15,ANKRD13A,ANKRD17,ANP32B,ANTXR2,ANXA8,APOOL,ARF4,ARF6,ARHGAP17,ARHGAP18,ARHGAP21,ARHGEF2,ARL5B,ARL8A,ARMCX1,ARPC3,ARRDC3,ASAP1,ATP1B4,ATP6V1F,ATP9A,ATRIP,ATXN7L3,B4GALT5,BANP,BATF2,BBX,BOD1L1,BRD4,BSG,BST2,BTBD10,BTG2,C10ORF71,C11ORF54,C19ORF66,C1ORF131,C2CD5,C9ORF89,CAMK2G,CANX,CASP7,CASQ2,CAV3,CBFB,CBX4,CCAR1,C…
GO:CC	cytoplasm	GO:0005737	2.08985e-13	12.6799	11620	771	579	18842	ABCG1,ABL1,ACACB,ACTC1,ACTR3,ACVR2B,ADAR,ADM,ADPRHL2,AFTPH,AGO2,AGPAT5,AHSA1,AIDA,AKR1C2,ALDH2,AMPD3,ANAPC15,ANKIB1,ANKRD13A,ANKRD17,ANP32B,ANTXR2,ANXA8,APOOL,ARF4,ARF6,ARHGAP17,ARHGAP18,ARHGAP21,ARHGAP28,ARHGEF2,ARL5B,ARL8A,ARMCX1,ARPC3,ARPP21,ARRDC3,ASAP1,ATP6V1F,ATP9A,B4GALT5,BBX,BRD4,BSG,BST2,BTBD10,BTG2,BZW1,C10ORF71,C19ORF66,C2CD5,C9ORF89,CAMK2G,CANX,CARS,CASP7,CASQ2,CAV3,CCAR1,CCDC115,CCDC…
GO:CC	intracellular membrane-bounded organelle	GO:0043231	1.49087e-12	11.8266	11036	771	554	18842	ABCG1,ABL1,ACACB,ACTR3,ADAR,ADPRHL2,AFTPH,AGO2,AGPAT5,AHSA1,ALDH2,ANAPC15,ANKRD17,ANP32B,ANTXR2,APOOL,ARF4,ARF6,ARHGAP17,ARHGAP18,ARHGAP21,ARHGEF2,ARL5B,ARL8A,ARMCX1,ARPC3,ARRDC3,ATP1B4,ATP6V1F,ATP9A,ATRIP,ATXN7L3,B4GALT5,BANP,BATF2,BBX,BOD1L1,BRD4,BSG,BST2,BTBD10,BTG2,C11ORF54,C19ORF66,C9ORF89,CAMK2G,CANX,CASP7,CASQ2,CAV3,CBFB,CBX4,CCAR1,CCDC115,CCDC69,CCNB1IP1,CCNI,CCNL2,CCNT1,CCNY,CCT8,CDK2AP1…
GO:CC	intracellular organelle part	GO:0044446	1.64756e-11	10.7832	9699	771	498	18842	ABCG1,ABL1,ACACB,ACTC1,ACTR3,ADAR,ADPRHL2,AFTPH,AGO2,AGPAT5,ALDH2,AMPD3,ANAPC15,ANKRD17,ANP32B,ANTXR2,ANXA8,APOOL,ARF6,ARHGAP18,ARHGAP21,ARHGEF2,ARL5B,ARL8A,ARMCX1,ARPC3,ASAP1,ATP1B4,ATP6V1F,ATP9A,ATRIP,ATXN7L3,B4GALT5,BANP,BATF2,BBX,BOD1L1,BRD4,BSG,BST2,BTBD10,C11ORF54,C19ORF66,C2CD5,C9ORF89,CAMK2G,CANX,CASP7,CASQ2,CAV3,CBFB,CBX4,CCAR1,CCDC115,CCDC14,CCDC69,CCNB1IP1,CCNL2,CCNT1,CCT3,CCT7,CCT8,CD…
GO:CC	nucleoplasm	GO:0005654	2.89126e-11	10.5389	3553	771	229	18842	ABL1,ADAR,ADPRHL2,AGO2,ANAPC15,ARHGAP18,ATRIP,ATXN7L3,BANP,BBX,BOD1L1,BRD4,C11ORF54,C19ORF66,CAMK2G,CASP7,CBFB,CBX4,CCAR1,CCNL2,CCNT1,CCT8,CDK2AP1,CDKN1A,CHFR,CHTF18,CIRBP,CLOCK,CMTR1,COL4A3BP,COMMD8,COPS6,CPSF3,CTBP1,CTDSP2,CTSA,CUX1,CWC22,CX3CR1,DAZAP1,DDI2,DDX5,DGKZ,DHX15,DNAJB4,DNMT1,DPP3,DTX3L,DUSP18,DUSP23,EID2,EIF4A3,EPC1,EPC2,ETS1,EXOSC6,EYA3,FHL2,FMR1,FNDC1,FOSL2,FTO,GATAD2B,GIT2,GPSM1,H…
GO:CC	membrane-bounded organelle	GO:0043227	1.84686e-10	9.73357	12536	771	602	18842	ABCG1,ABL1,ACACB,ACTC1,ACTR3,ADAR,ADPRHL2,AFTPH,AGO2,AGPAT5,AHSA1,ALDH2,AMPD3,ANAPC15,ANGPT1,ANGPTL1,ANKRD13A,ANKRD17,ANP32B,ANTXR2,ANXA8,APOOL,ARF4,ARF6,ARHGAP17,ARHGAP18,ARHGAP21,ARHGEF2,ARL5B,ARL8A,ARMCX1,ARPC3,ARRDC3,ART3,ATP1B4,ATP6V1F,ATP9A,ATRIP,ATXN7L3,B4GALT5,BANP,BATF2,BBX,BOD1L1,BRD4,BSG,BST2,BTBD10,BTG2,C11ORF54,C19ORF66,C2CD5,C9ORF89,CAMK2G,CANX,CASP7,CASQ2,CAV3,CBFB,CBX4,CCAR1,CCDC1…
GO:CC	organelle	GO:0043226	2.3619e-10	9.62674	13667	771	642	18842	ABCG1,ABL1,ACACB,ACTC1,ACTR3,ADAR,ADPRHL2,AFTPH,AGO2,AGPAT5,AHSA1,ALDH2,AMPD3,ANAPC15,ANGPT1,ANGPTL1,ANKRD13A,ANKRD17,ANP32B,ANTXR2,ANXA8,APOOL,ARF4,ARF6,ARHGAP17,ARHGAP18,ARHGAP21,ARHGEF2,ARL5B,ARL8A,ARMCX1,ARPC3,ARRDC3,ART3,ASAP1,ATP1B4,ATP6V1F,ATP9A,ATRIP,ATXN7L3,B4GALT5,BANP,BATF2,BBX,BOD1L1,BRD4,BSG,BST2,BTBD10,BTG2,C10ORF71,C11ORF54,C19ORF66,C1ORF131,C2CD5,C9ORF89,CAMK2G,CANX,CASP7,CASQ2,CA…
GO:CC	intracellular organelle lumen	GO:0070013	5.0343e-10	9.29806	5664	771	322	18842	ABL1,ADAR,ADPRHL2,AGO2,ALDH2,AMPD3,ANAPC15,ANP32B,APOOL,ARHGAP18,ATRIP,ATXN7L3,BANP,BATF2,BBX,BOD1L1,BRD4,BTBD10,C11ORF54,C19ORF66,CAMK2G,CANX,CASP7,CASQ2,CBFB,CBX4,CCAR1,CCNB1IP1,CCNL2,CCNT1,CCT8,CDK2AP1,CDK5RAP3,CDKN1A,CFD,CHFR,CHTF18,CIRBP,CLIC4,CLOCK,CMTR1,COL4A3BP,COMMD8,COPS6,CPSF3,CTBP1,CTDSP2,CTSA,CUX1,CWC22,CX3CR1,D2HGDH,DAB2,DAZAP1,DDI2,DDX27,DDX5,DDX50,DGKZ,DHX15,DNAJB11,DNAJB4,DNMT1,D…
GO:CC	membrane-enclosed lumen	GO:0031974	5.0343e-10	9.29806	5664	771	322	18842	ABL1,ADAR,ADPRHL2,AGO2,ALDH2,AMPD3,ANAPC15,ANP32B,APOOL,ARHGAP18,ATRIP,ATXN7L3,BANP,BATF2,BBX,BOD1L1,BRD4,BTBD10,C11ORF54,C19ORF66,CAMK2G,CANX,CASP7,CASQ2,CBFB,CBX4,CCAR1,CCNB1IP1,CCNL2,CCNT1,CCT8,CDK2AP1,CDK5RAP3,CDKN1A,CFD,CHFR,CHTF18,CIRBP,CLIC4,CLOCK,CMTR1,COL4A3BP,COMMD8,COPS6,CPSF3,CTBP1,CTDSP2,CTSA,CUX1,CWC22,CX3CR1,D2HGDH,DAB2,DAZAP1,DDI2,DDX27,DDX5,DDX50,DGKZ,DHX15,DNAJB11,DNAJB4,DNMT1,D…
GO:CC	organelle lumen	GO:0043233	5.0343e-10	9.29806	5664	771	322	18842	ABL1,ADAR,ADPRHL2,AGO2,ALDH2,AMPD3,ANAPC15,ANP32B,APOOL,ARHGAP18,ATRIP,ATXN7L3,BANP,BATF2,BBX,BOD1L1,BRD4,BTBD10,C11ORF54,C19ORF66,CAMK2G,CANX,CASP7,CASQ2,CBFB,CBX4,CCAR1,CCNB1IP1,CCNL2,CCNT1,CCT8,CDK2AP1,CDK5RAP3,CDKN1A,CFD,CHFR,CHTF18,CIRBP,CLIC4,CLOCK,CMTR1,COL4A3BP,COMMD8,COPS6,CPSF3,CTBP1,CTDSP2,CTSA,CUX1,CWC22,CX3CR1,D2HGDH,DAB2,DAZAP1,DDI2,DDX27,DDX5,DDX50,DGKZ,DHX15,DNAJB11,DNAJB4,DNMT1,D…
GO:CC	organelle part	GO:0044422	9.15876e-10	9.03816	10009	771	503	18842	ABCG1,ABL1,ACACB,ACTC1,ACTR3,ADAR,ADPRHL2,AFTPH,AGO2,AGPAT5,ALDH2,AMPD3,ANAPC15,ANKRD17,ANP32B,ANTXR2,ANXA8,APOOL,ARF6,ARHGAP18,ARHGAP21,ARHGEF2,ARL5B,ARL8A,ARMCX1,ARPC3,ASAP1,ATP1B4,ATP6V1F,ATP9A,ATRIP,ATXN7L3,B4GALT5,BANP,BATF2,BBX,BOD1L1,BRD4,BSG,BST2,BTBD10,C10ORF71,C11ORF54,C19ORF66,C2CD5,C9ORF89,CAMK2G,CANX,CASP7,CASQ2,CAV3,CBFB,CBX4,CCAR1,CCDC115,CCDC14,CCDC69,CCNB1IP1,CCNL2,CCNT1,CCT3,CCT…
GO:CC	nuclear part	GO:0044428	8.87778e-09	8.0517	4894	771	282	18842	ABL1,ADAR,ADPRHL2,AGO2,AGPAT5,ANAPC15,ANKRD17,ANP32B,ARHGAP18,ATP1B4,ATRIP,ATXN7L3,BANP,BATF2,BBX,BOD1L1,BRD4,BTBD10,C11ORF54,C19ORF66,CAMK2G,CASP7,CBFB,CBX4,CCAR1,CCNB1IP1,CCNL2,CCNT1,CCT8,CDK2AP1,CDK5RAP3,CDKN1A,CHFR,CHMP2A,CHTF18,CIRBP,CLIC4,CLOCK,CMTR1,COL4A3BP,COMMD8,COPS6,CPSF3,CTBP1,CTDSP2,CTSA,CUX1,CWC22,CX3CR1,DAB2,DAZAP1,DDI2,DDX27,DDX5,DDX50,DGKZ,DHX15,DNAJB4,DNAJC1,DNMT1,DPP3,DTX3L,DU…
GO:CC	nuclear lumen	GO:0031981	1.36491e-08	7.8649	4518	771	264	18842	ABL1,ADAR,ADPRHL2,AGO2,ANAPC15,ANP32B,ARHGAP18,ATRIP,ATXN7L3,BANP,BATF2,BBX,BOD1L1,BRD4,BTBD10,C11ORF54,C19ORF66,CAMK2G,CASP7,CBFB,CBX4,CCAR1,CCNB1IP1,CCNL2,CCNT1,CCT8,CDK2AP1,CDK5RAP3,CDKN1A,CHFR,CHTF18,CIRBP,CLIC4,CLOCK,CMTR1,COL4A3BP,COMMD8,COPS6,CPSF3,CTBP1,CTDSP2,CTSA,CUX1,CWC22,CX3CR1,DAB2,DAZAP1,DDI2,DDX27,DDX5,DDX50,DGKZ,DHX15,DNAJB4,DNMT1,DPP3,DTX3L,DUSP18,DUSP23,EDF1,EID2,EIF4A3,EPC1,EP…
GO:CC	nucleus	GO:0005634	3.2829e-08	7.48374	7445	771	391	18842	ABL1,ACACB,ACTR3,ADAR,ADPRHL2,AFTPH,AGO2,AGPAT5,ANAPC15,ANKRD17,ANP32B,ARHGAP17,ARHGAP18,ARPC3,ATP1B4,ATRIP,ATXN7L3,BANP,BATF2,BBX,BOD1L1,BRD4,BTBD10,BTG2,C11ORF54,C19ORF66,C9ORF89,CAMK2G,CASP7,CBFB,CBX4,CCAR1,CCDC69,CCNB1IP1,CCNI,CCNL2,CCNT1,CCNY,CCT8,CDK2AP1,CDK5RAP3,CDKN1A,CELF2,CERS5,CHFR,CHMP1B,CHMP2A,CHMP5,CHTF18,CIRBP,CLIC4,CLOCK,CMTR1,CNOT6L,COL4A3BP,COMMD8,COPS6,CPSF3,CRIPAK,CTBP1,CTDSP2…
GO:CC	focal adhesion	GO:0005925	3.83991e-06	5.41568	403	771	43	18842	ACTC1,ACTR3,ARF6,ARHGEF2,ARPC3,BSG,CAV3,CD151,CD81,CNN3,CORO1C,DAB2,FHL2,GIT2,GNA13,HNRNPK,HSP90B1,HSPA5,HYOU1,IGF2R,ITGAV,JAK1,JUP,KRAS,LAP3,LAYN,MAPRE1,MARCKS,MCAM,MYH9,NCKAP1,PDCD6IP,PDIA3,PEAK1,PHLDB2,PI4KA,RALA,SH3KBP1,SNAP23,SYNE2,TLE2,TNS3,YWHAB
GO:CC	cell-substrate adherens junction	GO:0005924	4.78502e-06	5.32012	406	771	43	18842	ACTC1,ACTR3,ARF6,ARHGEF2,ARPC3,BSG,CAV3,CD151,CD81,CNN3,CORO1C,DAB2,FHL2,GIT2,GNA13,HNRNPK,HSP90B1,HSPA5,HYOU1,IGF2R,ITGAV,JAK1,JUP,KRAS,LAP3,LAYN,MAPRE1,MARCKS,MCAM,MYH9,NCKAP1,PDCD6IP,PDIA3,PEAK1,PHLDB2,PI4KA,RALA,SH3KBP1,SNAP23,SYNE2,TLE2,TNS3,YWHAB
GO:CC	cell-substrate junction	GO:0030055	6.86489e-06	5.16337	411	771	43	18842	ACTC1,ACTR3,ARF6,ARHGEF2,ARPC3,BSG,CAV3,CD151,CD81,CNN3,CORO1C,DAB2,FHL2,GIT2,GNA13,HNRNPK,HSP90B1,HSPA5,HYOU1,IGF2R,ITGAV,JAK1,JUP,KRAS,LAP3,LAYN,MAPRE1,MARCKS,MCAM,MYH9,NCKAP1,PDCD6IP,PDIA3,PEAK1,PHLDB2,PI4KA,RALA,SH3KBP1,SNAP23,SYNE2,TLE2,TNS3,YWHAB
GO:CC	nuclear body	GO:0016604	2.01808e-05	4.69506	768	771	64	18842	ABL1,ADPRHL2,ARHGAP18,BANP,C11ORF54,CBX4,CCNL2,CDKN1A,CHFR,CWC22,DGKZ,DHX15,DPP3,EIF4A3,FMR1,FNDC1,FTO,GATAD2B,HDAC5,HIRA,HMBOX1,HNRNPM,HOXC10,IFI16,ISG20,KAT6A,MED19,MSL1,NFKBIZ,NONO,NOP58,NSRP1,NUFIP2,NXF1,OBSCN,PABPN1,PCNP,PHF5A,PLRG1,POLK,PRKAA2,PRKACA,PRPF40B,PTEN,RAF1,RBM4,RNF169,RNPS1,SATB1,SETD1B,SF3B2,SH3BP5,SLU7,TAP2,TDP2,TERF2IP,TLE2,TRIM22,TRIM25,WAC,XPO1,ZBTB16,ZNF106,ZNF830
GO:CC	endosome membrane	GO:0010008	0.00044029	3.35626	477	771	43	18842	ANTXR2,ANXA8,ARF6,ARL8A,ATP9A,CHMP1B,CHMP2A,CHMP5,CORO1C,DTX3L,EHD4,EPHA8,FZD7,HGS,HLA-B,HLA-C,HLA-F,HLA-G,IFITM3,IRAK1,IRAK2,IRF7,LAMP1,LAPTM4A,MITD1,MVB12A,MYD88,PDIA3,RAB11FIP3,RAP2A,RNF13,SLC9A9,SNX21,SPNS2,STARD3NL,STEAP4,TBK1,TMEM106B,TMEM184A,UBA1,USP8,VPS35,WLS
GO:CC	nuclear speck	GO:0016607	0.000596547	3.22436	402	771	38	18842	ARHGAP18,CBX4,CCNL2,CWC22,DGKZ,DHX15,DPP3,EIF4A3,FNDC1,FTO,GATAD2B,HDAC5,IFI16,KAT6A,MSL1,NFKBIZ,NONO,NSRP1,NXF1,PABPN1,PHF5A,PLRG1,PRKAA2,PRKACA,PRPF40B,RAF1,RBM4,RNF169,RNPS1,SETD1B,SF3B2,SLU7,TAP2,TRIM22,WAC,ZBTB16,ZNF106,ZNF830
GO:CC	extracellular exosome	GO:0070062	0.000874592	3.05819	2143	771	130	18842	ACTC1,ACTR3,AGO2,AHSA1,ALDH2,ANGPT1,ANGPTL1,ANP32B,ARF4,ARF6,ARL8A,ARPC3,ART3,ATP6V1F,BSG,BST2,BTG2,C11ORF54,CANX,CCT3,CCT7,CCT8,CD47,CD81,CFB,CFD,CFH,CHMP1B,CHMP2A,CHMP5,CILP,CLIC4,CTSA,CYBRD1,DDX5,DIP2B,DNAJA1,DPP3,DYNC1H1,EHD4,ESD,FREM2,FUCA2,GLRX,GNA13,GNB4,GNG12,GOLGA7,GOT2,GP1BA,GPX3,GSTM3,H2AFJ,HGS,HIRA,HIST1H2AC,HIST1H2BD,HLA-B,HLA-C,HNRNPC,HNRNPK,HNRNPM,HSP90AA1,HSP90B1,HSPA5,HYOU1,IGF2R…
GO:CC	viral replication complex	GO:0019034	0.00108698	2.96378	4	771	4	18842	C19ORF66,FMR1,MOV10,PI4KA
GO:CC	anchoring junction	GO:0070161	0.0010895	2.96277	561	771	47	18842	ACTC1,ACTR3,ARF6,ARHGEF2,ARPC3,BSG,CAV3,CD151,CD81,CNN3,CORO1C,DAB2,FHL2,GIT2,GNA13,HNRNPK,HSP90B1,HSPA5,HYOU1,IGF2R,ITGAV,JAK1,JUP,KRAS,LAP3,LAYN,LDB3,MAPRE1,MARCKS,MCAM,MYH9,NCKAP1,PDCD6IP,PDIA3,PDLIM5,PEAK1,PHLDB2,PI4KA,RALA,SH3KBP1,SNAP23,SYNE2,SYNM,TLE2,TNS3,UBA1,YWHAB
GO:CC	adherens junction	GO:0005912	0.00119775	2.92163	546	771	46	18842	ACTC1,ACTR3,ARF6,ARHGEF2,ARPC3,BSG,CAV3,CD151,CD81,CNN3,CORO1C,DAB2,FHL2,GIT2,GNA13,HNRNPK,HSP90B1,HSPA5,HYOU1,IGF2R,ITGAV,JAK1,JUP,KRAS,LAP3,LAYN,LDB3,MAPRE1,MARCKS,MCAM,MYH9,NCKAP1,PDCD6IP,PDIA3,PDLIM5,PEAK1,PHLDB2,PI4KA,RALA,SH3KBP1,SNAP23,SYNE2,SYNM,TLE2,TNS3,YWHAB
GO:CC	vesicle	GO:0031982	0.00124829	2.90369	3891	771	211	18842	ABCG1,ACTC1,ACTR3,AFTPH,AGO2,AHSA1,ALDH2,AMPD3,ANGPT1,ANGPTL1,ANKRD13A,ANP32B,ANTXR2,ANXA8,APOOL,ARF4,ARF6,ARHGAP21,ARHGEF2,ARL8A,ARPC3,ARRDC3,ART3,ATP6V1F,ATP9A,BSG,BST2,BTG2,C11ORF54,C2CD5,CAMK2G,CANX,CAV3,CCDC115,CCT3,CCT7,CCT8,CD47,CD81,CFB,CFD,CFH,CHMP1B,CHMP2A,CHMP5,CILP,CLIC4,CORO1C,CTSA,CYBRD1,DAB2,DDX5,DENND6A,DIP2B,DNAJA1,DPP3,DTX3L,DYNC1H1,DYNLT1,EHD4,EPHA8,ERP29,ESD,F8,FCHO2,FGFR1,FGF…
GO:CC	extracellular vesicle	GO:1903561	0.00151509	2.81956	2166	771	130	18842	ACTC1,ACTR3,AGO2,AHSA1,ALDH2,ANGPT1,ANGPTL1,ANP32B,ARF4,ARF6,ARL8A,ARPC3,ART3,ATP6V1F,BSG,BST2,BTG2,C11ORF54,CANX,CCT3,CCT7,CCT8,CD47,CD81,CFB,CFD,CFH,CHMP1B,CHMP2A,CHMP5,CILP,CLIC4,CTSA,CYBRD1,DDX5,DIP2B,DNAJA1,DPP3,DYNC1H1,EHD4,ESD,FREM2,FUCA2,GLRX,GNA13,GNB4,GNG12,GOLGA7,GOT2,GP1BA,GPX3,GSTM3,H2AFJ,HGS,HIRA,HIST1H2AC,HIST1H2BD,HLA-B,HLA-C,HNRNPC,HNRNPK,HNRNPM,HSP90AA1,HSP90B1,HSPA5,HYOU1,IGF2R…
GO:CC	extracellular organelle	GO:0043230	0.00170359	2.76864	2171	771	130	18842	ACTC1,ACTR3,AGO2,AHSA1,ALDH2,ANGPT1,ANGPTL1,ANP32B,ARF4,ARF6,ARL8A,ARPC3,ART3,ATP6V1F,BSG,BST2,BTG2,C11ORF54,CANX,CCT3,CCT7,CCT8,CD47,CD81,CFB,CFD,CFH,CHMP1B,CHMP2A,CHMP5,CILP,CLIC4,CTSA,CYBRD1,DDX5,DIP2B,DNAJA1,DPP3,DYNC1H1,EHD4,ESD,FREM2,FUCA2,GLRX,GNA13,GNB4,GNG12,GOLGA7,GOT2,GP1BA,GPX3,GSTM3,H2AFJ,HGS,HIRA,HIST1H2AC,HIST1H2BD,HLA-B,HLA-C,HNRNPC,HNRNPK,HNRNPM,HSP90AA1,HSP90B1,HSPA5,HYOU1,IGF2R…
GO:CC	cytoplasmic vesicle part	GO:0044433	0.0018539	2.73191	1506	771	97	18842	AFTPH,AMPD3,ANTXR2,ANXA8,APOOL,ARF6,ARHGAP21,ARL8A,ATP9A,BSG,BST2,C2CD5,CAMK2G,CCT8,CD47,CFD,CHMP1B,CHMP2A,CHMP5,CLIC4,CORO1C,CTSA,DAB2,DTX3L,DYNC1H1,DYNLT1,EHD4,EPHA8,F8,FUCA2,FZD7,GOLGA7,HGS,HLA-B,HLA-C,HLA-F,HLA-G,HSP90AA1,HSP90B1,HYOU1,IFITM3,IGF2R,IL15RA,IRAK1,IRAK2,IRF7,ITGAV,JUP,LAMP1,LAPTM4A,LGALS3BP,LNPEP,MITD1,MLEC,MVB12A,MYD88,NRAS,PAFAH1B2,PAM,PDIA3,PENK,PGAM1,PHACTR2,PI4KA,PRCP,PSAP,…
GO:CC	cytoplasmic vesicle	GO:0031410	0.00207965	2.68201	2346	771	138	18842	ABCG1,AFTPH,AMPD3,ANKRD13A,ANTXR2,ANXA8,APOOL,ARF6,ARHGAP21,ARHGEF2,ARL8A,ARRDC3,ATP9A,BSG,BST2,C2CD5,CAMK2G,CANX,CCDC115,CCT8,CD47,CFD,CHMP1B,CHMP2A,CHMP5,CLIC4,CORO1C,CTSA,DAB2,DENND6A,DTX3L,DYNC1H1,DYNLT1,EHD4,EPHA8,ERP29,ESD,F8,FCHO2,FGFR1,FGFRL1,FUCA2,FZD7,GBP3,GGNBP2,GNA13,GOLGA7,GOLPH3,HGS,HLA-B,HLA-C,HLA-F,HLA-G,HSP90AA1,HSP90B1,HSPA5,HYOU1,IFITM3,IGF2R,IL15RA,IRAK1,IRAK2,IRF7,ITGAV,JAK1,…
GO:CC	intracellular vesicle	GO:0097708	0.00222335	2.65299	2349	771	138	18842	ABCG1,AFTPH,AMPD3,ANKRD13A,ANTXR2,ANXA8,APOOL,ARF6,ARHGAP21,ARHGEF2,ARL8A,ARRDC3,ATP9A,BSG,BST2,C2CD5,CAMK2G,CANX,CCDC115,CCT8,CD47,CFD,CHMP1B,CHMP2A,CHMP5,CLIC4,CORO1C,CTSA,DAB2,DENND6A,DTX3L,DYNC1H1,DYNLT1,EHD4,EPHA8,ERP29,ESD,F8,FCHO2,FGFR1,FGFRL1,FUCA2,FZD7,GBP3,GGNBP2,GNA13,GOLGA7,GOLPH3,HGS,HLA-B,HLA-C,HLA-F,HLA-G,HSP90AA1,HSP90B1,HSPA5,HYOU1,IFITM3,IGF2R,IL15RA,IRAK1,IRAK2,IRF7,ITGAV,JAK1,…
GO:CC	endosomal part	GO:0044440	0.00235528	2.62796	526	771	44	18842	ANTXR2,ANXA8,ARF6,ARL8A,ATP9A,CHMP1B,CHMP2A,CHMP5,CORO1C,DTX3L,EHD4,EPHA8,FZD7,HGS,HLA-B,HLA-C,HLA-F,HLA-G,IFITM3,IRAK1,IRAK2,IRF7,LAMP1,LAPTM4A,LNPEP,MITD1,MVB12A,MYD88,PDIA3,RAB11FIP3,RAP2A,RNF13,SLC9A9,SNX21,SPNS2,STARD3NL,STEAP4,TBK1,TMEM106B,TMEM184A,UBA1,USP8,VPS35,WLS
GO:CC	whole membrane	GO:0098805	0.0025905	2.58662	1678	771	105	18842	ACACB,AFTPH,AGPAT5,ANGPT1,ANTXR2,ANXA8,ARF6,ARL8A,ARMCX1,ATP6V1F,ATP9A,BSG,BST2,CAMK2G,CAV3,CCDC115,CD47,CHMP1B,CHMP2A,CHMP5,CORO1C,CTSA,CYBRD1,DAB2,DTX3L,EHD4,EPHA8,FNDC5,FZD7,GNB4,HADHB,HGS,HLA-B,HLA-C,HLA-F,HLA-G,HMOX1,IFI27,IFITM3,IGF2R,IRAK1,IRAK2,IRF7,ITGAV,KRAS,LAMP1,LAPTM4A,LNPEP,MAVS,MITD1,MLEC,MTX3,MVB12A,MYD88,NAPB,NRAS,PAM,PDIA3,PHACTR2,PI4KA,PLSCR1,PNPLA8,PPT1,PRCP,PRKACA,PRNP,PSAP,R…
GO:CC	cell part	GO:0044464	0.00263934	2.5785	17004	771	729	18842	ABCG1,ABHD3,ABL1,ACACB,ACTC1,ACTR3,ACVR2B,ADAR,ADM,ADPRHL2,AFTPH,AGO2,AGPAT5,AHSA1,AIDA,AKAP2,AKR1C2,ALDH2,AMPD3,ANAPC15,ANGPT1,ANKIB1,ANKRD13A,ANKRD17,ANP32B,ANTXR2,ANXA8,APOOL,ARF4,ARF6,ARHGAP17,ARHGAP18,ARHGAP21,ARHGAP28,ARHGEF2,ARL5B,ARL8A,ARMCX1,ARPC3,ARPP21,ARRDC3,ART3,ASAP1,ATP1B4,ATP6V1F,ATP9A,ATRIP,ATXN7L3,B4GALT5,BANP,BATF2,BBX,BEST3,BOD1L1,BRD4,BSG,BST2,BTBD10,BTG2,BTN3A2,BTN3A3,BTNL9,…
GO:CC	intracellular non-membrane-bounded organelle	GO:0043232	0.00421135	2.37558	4904	771	253	18842	ABL1,ACTC1,ACTR3,ADAR,ADPRHL2,AGO2,ANKRD17,ANP32B,ARHGAP21,ARHGEF2,ARL8A,ARPC3,ASAP1,BATF2,BBX,BOD1L1,BRD4,BTBD10,C10ORF71,C19ORF66,C1ORF131,C2CD5,CANX,CASQ2,CAV3,CCDC14,CCDC69,CCNB1IP1,CCT3,CCT7,CCT8,CDC42EP3,CDC42SE2,CDK5RAP3,CDKN1A,CEP120,CHMP2A,CHTF18,CIRBP,CLIC4,CLOCK,CNN3,CORO1C,CTNNAL1,CUX1,DAB2,DCP1A,DDI2,DDX27,DDX5,DDX50,DDX58,DDX60,DHRS3,DHX15,DNAJA1,DNAJC24,DNMT1,DYNC1H1,DYNLT1,EDF1,EI…
GO:CC	nucleoplasm part	GO:0044451	0.00425893	2.3707	1144	771	77	18842	ABL1,ADPRHL2,ARHGAP18,ATXN7L3,BANP,C11ORF54,CBX4,CCNL2,CCNT1,CDKN1A,CHFR,CPSF3,CWC22,DGKZ,DHX15,DPP3,EIF4A3,EPC1,EPC2,FMR1,FNDC1,FTO,GATAD2B,HDAC4,HDAC5,HIRA,HMBOX1,HNRNPM,HOXC10,IFI16,ISG20,KAT6A,KDM5D,KMT2C,KMT2D,MED19,MSL1,NFKBIZ,NONO,NOP58,NSRP1,NUFIP2,NXF1,OBSCN,PABPN1,PCNP,PHF5A,PLRG1,POLK,POLR2G,PRKAA2,PRKACA,PRPF40B,PTEN,RAF1,RBM4,RNF169,RNPS1,SATB1,SETD1B,SF3B2,SH3BP5,SLU7,SUPT16H,TAF1,T…
GO:CC	non-membrane-bounded organelle	GO:0043228	0.0048493	2.31432	4913	771	253	18842	ABL1,ACTC1,ACTR3,ADAR,ADPRHL2,AGO2,ANKRD17,ANP32B,ARHGAP21,ARHGEF2,ARL8A,ARPC3,ASAP1,BATF2,BBX,BOD1L1,BRD4,BTBD10,C10ORF71,C19ORF66,C1ORF131,C2CD5,CANX,CASQ2,CAV3,CCDC14,CCDC69,CCNB1IP1,CCT3,CCT7,CCT8,CDC42EP3,CDC42SE2,CDK5RAP3,CDKN1A,CEP120,CHMP2A,CHTF18,CIRBP,CLIC4,CLOCK,CNN3,CORO1C,CTNNAL1,CUX1,DAB2,DCP1A,DDI2,DDX27,DDX5,DDX50,DDX58,DDX60,DHRS3,DHX15,DNAJA1,DNAJC24,DNMT1,DYNC1H1,DYNLT1,EDF1,EI…
GO:CC	cell	GO:0005623	0.0054005	2.26757	17069	771	730	18842	ABCG1,ABHD3,ABL1,ACACB,ACTC1,ACTR3,ACVR2B,ADAR,ADM,ADPRHL2,AFTPH,AGO2,AGPAT5,AHSA1,AIDA,AKAP2,AKR1C2,ALDH2,AMPD3,ANAPC15,ANGPT1,ANKIB1,ANKRD13A,ANKRD17,ANP32B,ANTXR2,ANXA8,APOOL,ARF4,ARF6,ARHGAP17,ARHGAP18,ARHGAP21,ARHGAP28,ARHGEF2,ARL5B,ARL8A,ARMCX1,ARPC3,ARPP21,ARRDC3,ART3,ASAP1,ATP1B4,ATP6V1F,ATP9A,ATRIP,ATXN7L3,B4GALT5,BANP,BATF2,BBX,BEST3,BOD1L1,BRD4,BSG,BST2,BTBD10,BTG2,BTN3A2,BTN3A3,BTNL9,…
GO:CC	endomembrane system	GO:0012505	0.00543366	2.26491	4490	771	234	18842	ABCG1,ABL1,ACACB,AFTPH,AGPAT5,AHSA1,AMPD3,ANKRD13A,ANKRD17,ANTXR2,ANXA8,APOOL,ARF4,ARF6,ARHGAP21,ARHGEF2,ARL5B,ARL8A,ARRDC3,ATP1B4,ATP9A,B4GALT5,BSG,BST2,C9ORF89,CAMK2G,CANX,CASQ2,CAV3,CCDC115,CCT8,CD47,CDC42EP3,CERS5,CFD,CHMP1B,CHMP2A,CHMP5,COL4A3BP,CORO1C,CRIPAK,CTAGE15,CTSA,CUX1,DAB2,DENND5A,DENND6A,DHRS3,DNAJA1,DNAJB11,DNAJC1,DTX3L,DYNC1H1,DYNLT1,EBPL,EDEM3,EHD4,EPC1,EPHA8,ERP29,ESD,ESYT2,F8,…
GO:CC	ribonucleoprotein complex	GO:1990904	0.00781086	2.1073	878	771	62	18842	ADAR,AGO2,C19ORF66,CANX,CELF2,CIRBP,CLOCK,CWC22,DAZAP1,DCP1A,DDX5,DHX15,EIF2AK2,EIF4A3,EIF4B,FMR1,GHR,HNRNPC,HNRNPK,HNRNPM,LUC7L,MBNL1,METTL17,MOV10,MRPL17,MRPL48,MRPL49,MRPS21,MYH10,NFKBIZ,NOP58,NSRP1,NUFIP2,PABPN1,PAN3,PHF5A,PLRG1,PNRC2,POLR2G,PRKAA2,PRPF40B,PSMA4,RBM22,RBM4,RBMS1,RPL7L1,RPS27L,RRP1B,SF3B2,SLU7,SNRPF,SRP19,TDRD7,TRIM21,TSR1,UHMK1,WAC,XPO1,XRN1,YTHDF2,ZCCHC17,ZNF830
GO:CC	cytoplasmic ribonucleoprotein granule	GO:0036464	0.0086976	2.0606	213	771	23	18842	AGO2,C19ORF66,CIRBP,CLOCK,DCP1A,FMR1,GHR,HNRNPK,MBNL1,MOV10,NFKBIZ,NUFIP2,PAN3,PNRC2,POLR2G,PRKAA2,PSMA4,RBM4,TDRD7,TRIM21,UHMK1,XRN1,YTHDF2
GO:CC	ribonucleoprotein granule	GO:0035770	0.0193097	1.71422	224	771	23	18842	AGO2,C19ORF66,CIRBP,CLOCK,DCP1A,FMR1,GHR,HNRNPK,MBNL1,MOV10,NFKBIZ,NUFIP2,PAN3,PNRC2,POLR2G,PRKAA2,PSMA4,RBM4,TDRD7,TRIM21,UHMK1,XRN1,YTHDF2
GO:CC	endosome	GO:0005768	0.0325366	1.48763	922	771	62	18842	ABCG1,ANKRD13A,ANTXR2,ANXA8,ARF6,ARL8A,ARRDC3,ATP9A,BST2,CCDC115,CHMP1B,CHMP2A,CHMP5,CORO1C,DENND6A,DTX3L,EHD4,EPHA8,FZD7,GOLPH3,HGS,HLA-B,HLA-C,HLA-F,HLA-G,IFITM3,IGF2R,IL15RA,IRAK1,IRAK2,IRF7,JAK1,LAMP1,LAPTM4A,LNPEP,MITD1,MVB12A,MYD88,PDIA3,PI4K2B,PSAP,RAB11FIP3,RAP2A,RNF13,SAMD9L,SDF4,SLC9A9,SNX21,SPNS2,STARD3NL,STEAP4,TBK1,TGFBR1,TMEM106B,TMEM184A,TRAK2,UBA1,USP10,USP8,VPS35,WDFY1,WLS
GO:CC	host cell nucleus	GO:0042025	0.0344513	1.46279	7	771	4	18842	C19ORF66,FMR1,MOV10,PI4KA
GO:CC	host cell nuclear part	GO:0044094	0.0344513	1.46279	7	771	4	18842	C19ORF66,FMR1,MOV10,PI4KA
GO:CC	bounding membrane of organelle	GO:0098588	0.0446195	1.35048	2071	771	118	18842	ABCG1,ACACB,AFTPH,AGPAT5,ANTXR2,ANXA8,ARF6,ARHGAP21,ARL8A,ARMCX1,ATP6V1F,ATP9A,B4GALT5,BSG,BST2,CAMK2G,CASQ2,CAV3,CCDC115,CD47,CHMP1B,CHMP2A,CHMP5,CORO1C,CTSA,CUX1,CYBRD1,DAB2,DENND5A,DHRS3,DTX3L,EHD4,EPHA8,F8,FNDC5,FZD7,GBP3,GNB4,GOLGA6A,GOLGA7,GOLPH3,GOLT1B,GPSM1,HADHB,HGS,HLA-B,HLA-C,HLA-F,HLA-G,IFI27,IFITM3,IGF2R,IL15RA,IRAK1,IRAK2,IRF7,ITGAV,LAMP1,LAPTM4A,LGR5,LNPEP,MAVS,MGAT4B,MITD1,MLEC,MT…
KEGG	Hepatitis C	KEGG:05160	1.58657e-06	5.79954	155	319	24	7772	CD81,CDKN1A,DDX58,EIF2AK2,IFIT1,IRF7,IRF9,JAK1,KRAS,MAVS,MX1,MYC,NRAS,OAS1,OAS2,OAS3,RAF1,RSAD2,RXRA,STAT1,STAT2,TBK1,TNFRSF1A,YWHAB
KEGG	Influenza A	KEGG:05164	1.58931e-06	5.79879	167	319	25	7772	ADAR,DDX58,EIF2AK2,IFIH1,IRF7,IRF9,JAK1,KPNA2,MAVS,MX1,MYD88,NXF1,OAS1,OAS2,OAS3,PABPN1,RAF1,RSAD2,STAT1,STAT2,TBK1,TNFRSF1A,TNFSF10,TRIM25,XPO1
KEGG	Epstein-Barr virus infection	KEGG:05169	1.14064e-05	4.94285	197	319	26	7772	CDKN1A,DDX58,EIF2AK2,HLA-B,HLA-C,HLA-F,HLA-G,IRAK1,IRF7,IRF9,ISG15,JAK1,MAVS,MYC,MYD88,OAS1,OAS2,OAS3,PDIA3,POLK,PSMD11,STAT1,STAT2,TAP1,TAP2,TBK1
KEGG	Protein processing in endoplasmic reticulum	KEGG:04141	0.00142001	2.84771	166	319	20	7772	CANX,DNAJA1,DNAJB11,DNAJC1,EDEM3,EIF2AK2,ERP29,FBXO6,HSP90AA1,HSP90B1,HSPA5,HYOU1,NFE2L2,PDIA3,PDIA6,SEC13,SEC31A,SSR3,UBE2D1,UBE2D4
KEGG	Endocytosis	KEGG:04144	0.00200376	2.69815	243	319	25	7772	ARF6,ARPC3,ASAP1,CAV3,CHMP1B,CHMP2A,CHMP5,DAB2,EHD4,GIT2,HGS,HLA-B,HLA-C,HLA-F,HLA-G,IGF2R,MVB12A,PDCD6IP,RAB11FIP3,SH3KBP1,SMAP2,TGFBR1,TGFBR2,USP8,VPS35
KEGG	Measles	KEGG:05162	0.00475351	2.32299	138	319	17	7772	ADAR,DDX58,EIF2AK2,IFIH1,IRAK1,IRF7,IRF9,JAK1,MAVS,MX1,MYD88,OAS1,OAS2,OAS3,STAT1,STAT2,TBK1
KEGG	Kaposi sarcoma-associated herpesvirus infection	KEGG:05167	0.00746172	2.12716	186	319	20	7772	CDKN1A,CLEC2B,EIF2AK2,GNB4,GNG12,HLA-B,HLA-C,HLA-F,HLA-G,IRF7,IRF9,JAK1,KRAS,MYC,NRAS,RAF1,STAT1,STAT2,TBK1,TNFRSF1A
KEGG	Antigen processing and presentation	KEGG:04612	0.0105713	1.97587	69	319	11	7772	CANX,HLA-B,HLA-C,HLA-F,HLA-G,HSP90AA1,HSPA5,PDIA3,PSME1,TAP1,TAP2
KEGG	Pathways in cancer	KEGG:05200	0.0110023	1.95852	528	319	40	7772	ABL1,CAMK2G,CASP7,CDKN1A,CTBP1,ETS1,FGF4,FGFR1,FZD7,GNA13,GNB4,GNG12,GSTM3,GSTM5,HEY1,HMOX1,HSP90AA1,HSP90B1,IL15RA,IL6R,ITGAV,JAK1,JUP,KRAS,MYC,NFE2L2,NRAS,POLK,PRKACA,PTEN,RAF1,RALA,RASSF5,RXRA,SP1,STAT1,STAT2,TGFBR1,TGFBR2,ZBTB16
KEGG	Hepatitis B	KEGG:05161	0.0112409	1.9492	162	319	18	7772	CDKN1A,DDX58,IFIH1,IRAK1,IRF7,JAK1,KRAS,MAVS,MYC,MYD88,NRAS,RAF1,STAT1,STAT2,TBK1,TGFBR1,TGFBR2,YWHAB
KEGG	Human cytomegalovirus infection	KEGG:05163	0.0119651	1.92208	223	319	22	7772	CDKN1A,GNA13,GNB4,GNG12,HLA-B,HLA-C,HLA-F,HLA-G,IL6R,ITGAV,JAK1,KRAS,MYC,NRAS,PDIA3,PRKACA,RAF1,SP1,TAP1,TAP2,TBK1,TNFRSF1A
KEGG	NOD-like receptor signaling pathway	KEGG:04621	0.032128	1.49312	176	319	18	7772	ANTXR2,CARD6,GBP3,HSP90AA1,IFI16,IRF7,IRF9,JAK1,MAVS,MYD88,OAS1,OAS2,OAS3,RBCK1,STAT1,STAT2,SUGT1,TBK1
KEGG	Necroptosis	KEGG:04217	0.0347315	1.45928	162	319	17	7772	CAMK2G,CHMP1B,CHMP2A,CHMP5,EIF2AK2,H2AFJ,HIST1H2AC,HSP90AA1,IRF9,JAK1,MLKL,PARP1,RBCK1,STAT1,STAT2,TNFRSF1A,TNFSF10

## Sheet: midnightblue
source	term_name	term_id	adjusted_p_value	negative_log10_of_adjusted_p_value	term_size	query_size	intersection_size	effective_domain_size	intersections
GO:MF	extracellular matrix structural constituent	GO:0005201	4.25713e-11	10.3709	165	246	20	18098	BGN,COL1A1,COL1A2,COL3A1,COL5A1,COL5A2,COL6A1,COL6A2,COL6A3,EFEMP1,FBLN2,FBN1,FN1,LAMB2,MXRA5,PCOLCE,POSTN,TGFBI,THBS2,VCAN
GO:MF	cell adhesion molecule binding	GO:0050839	2.19014e-08	7.65953	502	246	29	18098	ANXA1,ANXA2,BAG3,CAPZA1,CLIC1,COL3A1,COL5A1,EIF4H,EIF5,FBN1,FLNA,FN1,FXYD5,ICAM2,LAMB2,LASP1,LIMA1,LOC102724985,MSN,PFN1,POSTN,PPP1CA,S100A11,SDCBP,TAGLN2,TGFBI,THBS4,THY1,TNKS1BP1
GO:MF	protein-containing complex binding	GO:0044877	2.37354e-08	7.6246	1128	246	45	18098	ACTB,ACVRL1,APOE,ARPC1B,BAG3,BCAP31,CAPZA1,CDKN1B,CDKN1C,CFL1,COL3A1,COL5A1,COL6A1,COL6A2,COLEC12,CTSK,FBN1,FCGRT,FLNA,FN1,GNAI2,HLA-E,ICAM2,LAMB2,LASP1,LIMA1,MAPT,MRC2,NFE2L1,PAFAH1B1,PCOLCE,PPIB,PPP1CA,SERPINH1,SHC1,SIDT2,SREBF1,STAB1,TGFBI,THBS4,THY1,TMOD1,TNKS1BP1,USP13,WAS
GO:MF	platelet-derived growth factor binding	GO:0048407	2.11631e-06	5.67442	12	246	6	18098	COL1A1,COL1A2,COL3A1,COL5A1,COL6A1,PDGFRB
GO:MF	glycosaminoglycan binding	GO:0005539	1.06214e-05	4.97382	236	246	17	18098	ADAMTS15,ANXA5,APOE,BGN,CCDC80,CLEC3B,COL5A1,FBN1,FN1,FSTL1,PAFAH1B1,PCOLCE,POSTN,STAB1,THBS2,THBS4,VCAN
GO:MF	structural molecule activity	GO:0005198	2.16872e-05	4.6638	680	246	29	18098	ACTB,APOE,ARPC1B,BGN,CLTCL1,COL1A1,COL1A2,COL3A1,COL5A1,COL5A2,COL6A1,COL6A2,COL6A3,EFEMP1,FBLN2,FBN1,FN1,LAMB2,MSN,MXRA5,MYL6,PCOLCE,POSTN,TGFBI,THBS2,TUBA1A,TUBA1B,TUBB2A,VCAN
GO:MF	extracellular matrix structural constituent conferring tensile strength	GO:0030020	2.78777e-05	4.55474	41	246	8	18098	COL1A1,COL1A2,COL3A1,COL5A1,COL5A2,COL6A1,COL6A2,COL6A3
GO:MF	heparin binding	GO:0008201	3.56671e-05	4.44773	170	246	14	18098	ADAMTS15,ANXA5,APOE,CCDC80,CLEC3B,COL5A1,FBN1,FN1,FSTL1,PAFAH1B1,PCOLCE,POSTN,THBS2,THBS4
GO:MF	sulfur compound binding	GO:1901681	0.000139416	3.85569	250	246	16	18098	ADAMTS15,ANXA5,APOE,CCDC80,CLEC3B,COL5A1,FBN1,FN1,FSTL1,GSTM1,GSTM2,PAFAH1B1,PCOLCE,POSTN,THBS2,THBS4
GO:MF	collagen binding	GO:0005518	0.000157564	3.80254	69	246	9	18098	COL6A1,COL6A2,CTSK,FN1,MRC2,PCOLCE,PPIB,SERPINH1,TGFBI
GO:MF	extracellular matrix binding	GO:0050840	0.000347667	3.45884	56	246	8	18098	ADAMTS15,ANXA2,BGN,CD248,FBLN2,OLFML2A,OLFML2B,TGFBI
GO:MF	actin binding	GO:0003779	0.000831014	3.08039	432	246	20	18098	ARPC1B,CAPZA1,CCR5,CFL1,FLNA,FXYD5,LASP1,LIMA1,MAPT,MARCKSL1,MSN,MSRB1,PFN1,PFN2,PPP1R18,S100A4,TMOD1,TMSB10,TMSB4X,WAS
GO:MF	cadherin binding	GO:0045296	0.00121196	2.91651	330	246	17	18098	ANXA1,ANXA2,BAG3,CAPZA1,CLIC1,EIF4H,EIF5,FLNA,FXYD5,LASP1,LIMA1,LOC102724985,PFN1,PPP1CA,S100A11,TAGLN2,TNKS1BP1
GO:MF	protein binding	GO:0005515	0.00126104	2.89927	12715	246	204	18098	ACKR1,ACTB,ACVRL1,ADAP2,ADIPOR2,AKAP1,AKT1,ALKBH6,ANXA1,ANXA2,ANXA5,AP2M1,APOE,ARHGAP9,ARHGDIA,ARHGDIB,ARPC1B,ATP1B3,BACE2,BAG3,BCAP31,BGN,BRD2,C1QA,C1QC,C4A,CAPZA1,CCDC80,CCND3,CCR5,CD14,CD248,CD99,CDC25B,CDC42EP5,CDKN1B,CDKN1C,CFL1,CLEC3B,CLIC1,CLIP1,CLTCL1,CMTM3,COL1A1,COL1A2,COL3A1,COL5A1,COL5A2,COL6A1,COL6A2,COL6A3,CPNE2,CRIP2,CTSK,CXCL16,CYB5R3,DAB2,DYNLL1,EFEMP1,EIF4H,EIF5,EMP3,FAT1,FBLN2,…
GO:MF	enzyme regulator activity	GO:0030234	0.00193516	2.71328	1037	246	33	18098	ADAP2,AKT1,ANXA1,ANXA2,ANXA5,APOE,ARHGAP9,ARHGDIA,ARHGDIB,ATP1B3,BAG3,C4A,CCND3,CDKN1B,CDKN1C,COL6A3,COX6A1,EIF5,FN1,PCOLCE,PFN1,PPP2R3A,PREX1,PTTG1,SERPING1,SERPINH1,SH3PXD2B,SKI,SOCS3,TBC1D4,THY1,TIMP1,WAS
GO:MF	SMAD binding	GO:0046332	0.00365284	2.43737	76	246	8	18098	ACVRL1,COL1A2,COL3A1,COL5A2,DAB2,FLNA,SKI,TGFB1I1
GO:MF	cytoskeletal protein binding	GO:0008092	0.00471746	2.32629	984	246	31	18098	ACTB,ANXA2,APOE,ARPC1B,CAPZA1,CCR5,CFL1,CLIP1,FLNA,FXYD5,GJA1,LASP1,LGMN,LIMA1,MAPT,MARCKSL1,MSN,MSRB1,MTUS1,PAFAH1B1,PFN1,PFN2,PPP1R18,RAB8A,S100A4,S100A6,SDCBP,TMOD1,TMSB10,TMSB4X,WAS
GO:MF	molecular function regulator	GO:0098772	0.00538105	2.26913	1827	246	47	18098	ADAP2,AKT1,ANXA1,ANXA2,ANXA5,APOE,ARHGAP9,ARHGDIA,ARHGDIB,ATP1B3,BAG3,C4A,CCND3,CDKN1B,CDKN1C,CMTM3,COL6A3,COX6A1,CXCL16,EFEMP1,EIF5,FBN1,FLNA,FN1,FXYD5,GRN,LY6E,MAPT,METRNL,PCOLCE,PFN1,PPP2R3A,PREX1,PTTG1,RGL1,SERPING1,SERPINH1,SH3PXD2B,SKI,SOCS3,TBC1D4,THBS4,THY1,TIMP1,TSPAN13,TYMP,WAS
GO:MF	growth factor binding	GO:0019838	0.00851735	2.0697	139	246	10	18098	ACVRL1,COL1A1,COL1A2,COL3A1,COL5A1,COL6A1,IGFBP4,PDGFRB,SDCBP,SHC1
GO:MF	actin monomer binding	GO:0003785	0.0167444	1.77613	29	246	5	18098	LIMA1,PFN1,PFN2,TMSB10,TMSB4X
GO:MF	anion binding	GO:0043168	0.0238948	1.6217	2820	246	62	18098	ACTB,ACVRL1,ADAMTS15,ADAP2,AKT1,ANXA1,ANXA2,ANXA5,APOE,ARF3,ARHGAP9,ARHGDIA,CCDC80,CLEC3B,COL5A1,CPNE2,CYB5R3,EIF5,FBN1,FN1,FSTL1,GIMAP1-GIMAP5,GIMAP4,GNAI2,GSTM1,GSTM2,HSPA9,LOC102724985,MAPT,MKNK2,NAGK,PAFAH1B1,PAPSS1,PCOLCE,PDE2A,PDGFRB,PFN1,PFN2,PLA2G2A,PLOD3,POPDC3,POSTN,PREX1,PSMC1,RAB31,RAB8A,RHOG,SDCBP,SESN1,SH3PXD2B,SHC1,STAB1,THBS2,THBS4,THY1,TMEM173,TNIK,TOP1,TUBA1A,TUBA1B,TUBB2A,VCAN
GO:MF	phospholipid binding	GO:0005543	0.0312927	1.50456	425	246	17	18098	ADAP2,AKT1,ANXA1,ANXA2,ANXA5,APOE,ARHGAP9,CPNE2,MAPT,PFN1,PFN2,PLA2G2A,PREX1,SDCBP,SH3PXD2B,SHC1,THY1
GO:MF	cadherin binding involved in cell-cell adhesion	GO:0098641	0.0362572	1.44061	18	246	4	18098	ANXA1,ANXA2,PPP1CA,S100A11
GO:MF	integrin binding	GO:0005178	0.0447387	1.34932	137	246	9	18098	COL3A1,COL5A1,FBN1,FN1,ICAM2,LAMB2,TGFBI,THBS4,THY1
GO:MF	phosphatidylinositol bisphosphate binding	GO:1902936	0.0469695	1.32818	108	246	8	18098	ADAP2,AKT1,ANXA2,MAPT,PFN1,PFN2,SDCBP,SH3PXD2B
GO:MF	enzyme binding	GO:0019899	0.0483156	1.31591	2228	246	51	18098	ACTB,ACVRL1,AKT1,ANXA2,ANXA5,ARHGDIA,ARHGDIB,ATP1B3,CCND3,CDC25B,CDC42EP5,CDKN1B,COL1A1,COL1A2,COL3A1,FLNA,FN1,GSTM1,GSTM2,HIF1A,HSPA9,MAPT,MSN,NRIP1,OS9,PAFAH1B1,PDGFRB,PFN1,PPIB,PPP1CA,PPP1R18,PREX1,RAB8A,RGL1,RHOG,SHC1,SKI,SLC12A7,SREBF1,SRGAP2B,TBC1D4,TCIRG1,THY1,TIMP1,TMEM173,TMSB4X,TNKS1BP1,TSPAN14,TUBA1B,USP13,WAS
GO:MF	proteoglycan binding	GO:0043394	0.04919	1.30812	36	246	5	18098	APOE,COL5A1,CTSK,FN1,SDCBP
GO:BP	cellular response to chemical stimulus	GO:0070887	4.58117e-11	10.339	3364	241	96	17847	ACKR1,ACTB,ACVRL1,ADIPOR2,AKT1,ANXA1,ANXA2,ANXA5,APOE,ARHGDIA,BAG3,CAPZA1,CCND3,CCR5,CD14,CDKN1B,CDKN1C,CFL1,CLEC3B,COL1A1,COL1A2,COL3A1,COL5A2,COL6A1,COLEC12,CPNE2,CRIP1,CXCL16,CYB5R3,DAB2,FBN1,FLNA,FN1,FSTL1,GJA1,GNAI2,GPX1,GSTM1,GSTM2,HIF1A,HLA-E,HSD3B7,HSPA9,IGHG1,LAPTM5,LGMN,MAPT,MIR21,MKNK2,MMP2,MSN,MT1E,MT1F,MT1G,MT1H,MT1HL1,MT2A,MTUS1,NFE2L1,NRIP1,PAFAH1B1,PCOLCE,PDE2A,PDGFRB,PLOD3,PLP2,P…
GO:BP	extracellular structure organization	GO:0043062	5.07417e-11	10.2946	429	241	31	17847	ANXA2,APOE,BGN,CCDC80,COL1A1,COL1A2,COL3A1,COL5A1,COL5A2,COL6A1,COL6A2,COL6A3,CTSK,FBLN2,FBN1,FN1,ICAM2,LAMB2,LOXL1,MMP2,OLFML2A,OLFML2B,PLA2G2A,PLOD3,POSTN,SDCBP,SERPINH1,SH3PXD2B,TGFBI,TIMP1,VCAN
GO:BP	extracellular matrix organization	GO:0030198	4.47177e-10	9.34952	375	241	28	17847	ANXA2,BGN,CCDC80,COL1A1,COL1A2,COL3A1,COL5A1,COL5A2,COL6A1,COL6A2,COL6A3,CTSK,FBLN2,FBN1,FN1,ICAM2,LAMB2,LOXL1,MMP2,OLFML2A,OLFML2B,PLOD3,POSTN,SERPINH1,SH3PXD2B,TGFBI,TIMP1,VCAN
GO:BP	response to organic substance	GO:0010033	5.90401e-10	9.22885	3388	241	94	17847	ACKR1,ACTB,ACVRL1,ADIPOR2,AKT1,ANXA1,ANXA2,ANXA5,APOE,ARHGDIA,ARPC1B,BAG3,BCAP31,CAPZA1,CCND3,CCR5,CD14,CDKN1B,CDKN1C,CFL1,CLEC3B,CNP,COL1A1,COL1A2,COL3A1,COL5A2,COL6A1,COL6A2,COLEC12,CRIP1,CXCL16,DAB2,DUSP6,FBN1,FLNA,FN1,FSTL1,GJA1,GNAI2,GSTM2,HIF1A,HLA-E,HSPA9,IGHG1,LAPTM5,LGMN,LOXL1,MAPT,MIR21,MMP2,MSN,MT1G,MT2A,MXRA5,NFE2L1,NRIP1,OS9,PAFAH1B1,PCOLCE,PDE2A,PDGFRB,PLOD3,PLP2,POSTN,PPIA,PSMA7,PS…
GO:BP	cell motility	GO:0048870	1.54706e-09	8.81049	1752	241	62	17847	ACTB,ACVRL1,AKT1,ANXA1,ANXA5,APOE,ARHGDIA,ARHGDIB,ATP1B3,CCR5,CD248,CD99,CFL1,COL1A1,COL1A2,COL3A1,COL5A1,CXCL16,DAB2,FAT1,FLNA,FN1,GJA1,GNAI2,GPX1,GRN,HIF1A,HSD3B7,IGKV1-17,LAMB2,LGMN,LIMA1,LOC102724985,MIR21,MIR22,MSN,MTUS1,MYADM,PAFAH1B1,PDGFRB,PFN1,PFN2,PLEKHO1,POSTN,PPIA,PREX1,RHOG,SDC3,SDCBP,SHC1,SKI,SLC7A7,SRGAP2B,TGFB1I1,THBS4,THY1,TIMP1,TMSB10,TMSB4X,TSPO,TUBB2A,WAS
GO:BP	localization of cell	GO:0051674	1.54706e-09	8.81049	1752	241	62	17847	ACTB,ACVRL1,AKT1,ANXA1,ANXA5,APOE,ARHGDIA,ARHGDIB,ATP1B3,CCR5,CD248,CD99,CFL1,COL1A1,COL1A2,COL3A1,COL5A1,CXCL16,DAB2,FAT1,FLNA,FN1,GJA1,GNAI2,GPX1,GRN,HIF1A,HSD3B7,IGKV1-17,LAMB2,LGMN,LIMA1,LOC102724985,MIR21,MIR22,MSN,MTUS1,MYADM,PAFAH1B1,PDGFRB,PFN1,PFN2,PLEKHO1,POSTN,PPIA,PREX1,RHOG,SDC3,SDCBP,SHC1,SKI,SLC7A7,SRGAP2B,TGFB1I1,THBS4,THY1,TIMP1,TMSB10,TMSB4X,TSPO,TUBB2A,WAS
GO:BP	supramolecular fiber organization	GO:0097435	3.01231e-09	8.5211	672	241	36	17847	ANXA2,APOE,ARPC1B,CAPZA1,CDC42EP5,CDKN1B,CFL1,CLIP1,COL1A1,COL1A2,COL3A1,COL5A1,COL5A2,FAT1,FLNA,GPX1,LIMA1,MAPT,MIR21,MSRB1,MYADM,PAFAH1B1,PDGFRB,PFN1,PFN2,PLOD3,PREX1,RHOG,S100A10,SERPINH1,SH3PXD2B,TMOD1,TMSB10,TMSB4X,WAS,ZYX
GO:BP	cell migration	GO:0016477	3.65601e-09	8.43699	1597	241	58	17847	ACVRL1,AKT1,ANXA1,APOE,ARHGDIA,ARHGDIB,ATP1B3,CCR5,CD248,CD99,CFL1,COL1A1,COL1A2,COL3A1,COL5A1,CXCL16,DAB2,FAT1,FLNA,FN1,GJA1,GNAI2,GPX1,GRN,HIF1A,HSD3B7,IGKV1-17,LAMB2,LGMN,LIMA1,LOC102724985,MIR21,MIR22,MSN,MTUS1,MYADM,PAFAH1B1,PDGFRB,PFN1,PFN2,PLEKHO1,POSTN,PPIA,PREX1,RHOG,SDC3,SDCBP,SHC1,SLC7A7,SRGAP2B,TGFB1I1,THBS4,THY1,TIMP1,TMSB10,TMSB4X,TSPO,TUBB2A
GO:BP	locomotion	GO:0040011	3.71718e-09	8.42979	1983	241	66	17847	ACTB,ACVRL1,AKT1,ANXA1,ANXA5,APOE,ARHGDIA,ARHGDIB,ATP1B3,CCR5,CD248,CD99,CFL1,CMTM3,COL1A1,COL1A2,COL3A1,COL5A1,CXCL16,DAB2,FAT1,FLNA,FN1,GJA1,GNAI2,GPX1,GRN,HIF1A,HSD3B7,IGKV1-17,LAMB2,LGMN,LIMA1,LOC102724985,MIR21,MIR22,MSN,MTUS1,MYADM,PAFAH1B1,PDGFRB,PFN1,PFN2,PLEKHO1,PLP2,POSTN,PPIA,PREX1,RHOG,SDC3,SDCBP,SHC1,SKI,SLC7A7,SRGAP2B,TGFB1I1,THBS4,THY1,TIMP1,TMSB10,TMSB4X,TSPO,TUBB2A,TYMP,WAS,ZSWIM6
GO:BP	anatomical structure morphogenesis	GO:0009653	3.79751e-09	8.4205	2764	241	81	17847	ACTB,ACVRL1,ADIPOR2,AKT1,ANXA1,ANXA2,AP2M1,APOE,ARHGDIA,CD248,CDC42EP5,CDKN1C,CFL1,CHSY1,CLTCL1,CNP,COL1A1,COL1A2,COL3A1,COL5A1,COL5A2,COL6A1,COL6A2,COL6A3,CRIP1,DAB2,EFEMP1,FAT1,FBN1,FLNA,FN1,FOXN3,GJA1,GPX1,GRN,HIF1A,LAMB2,MAFB,MAPT,MIR21,MIR22,MMP2,MSN,MYADM,NFE2L1,PAFAH1B1,PDGFRB,PFN1,PLEKHO1,PLOD3,POSTN,PPP1CA,PREX1,PSMA7,PSMC1,RAB8A,RHOG,S100A10,S100A6,SAT1,SERPINH1,SFRP4,SH3PXD2B,SHC1,SIDT…
GO:BP	developmental process	GO:0032502	5.25702e-09	8.27926	6449	241	140	17847	ACTB,ACVRL1,ADAP2,ADIPOR2,AKNA,AKT1,ANXA1,ANXA2,AP2M1,APOE,ARHGDIA,ARHGDIB,BACE2,BAG3,BGN,C1QA,C1QC,CD248,CDC25B,CDC42EP5,CDKN1B,CDKN1C,CFL1,CHSY1,CLEC3B,CLIC1,CLTCL1,CMTM3,CNP,COL1A1,COL1A2,COL3A1,COL5A1,COL5A2,COL6A1,COL6A2,COL6A3,CRIP1,CRIP2,CTSK,DAB2,DUSP6,DYNLL1,EFEMP1,EIF4H,FAT1,FBN1,FLNA,FN1,FOXN3,FSTL1,FXR1,GJA1,GLIS2,GPX1,GRN,HIF1A,HLA-E,HOXC6,HSPA9,LAMB2,LGMN,LOXL1,MAFB,MAPT,MEST,METRNL…
GO:BP	movement of cell or subcellular component	GO:0006928	8.25151e-09	8.08347	2221	241	70	17847	ACTB,ACVRL1,AKT1,ANXA1,ANXA5,APOE,ARHGDIA,ARHGDIB,ATP1B3,BAG3,CCR5,CD248,CD99,CDKN1B,CFL1,COL1A1,COL1A2,COL3A1,COL5A1,CXCL16,DAB2,DYNLL1,FAT1,FLNA,FN1,FYCO1,GJA1,GNAI2,GPX1,GRN,HIF1A,HSD3B7,IGKV1-17,LAMB2,LGMN,LIMA1,LOC102724985,MAPT,MIR21,MIR22,MSN,MTUS1,MYADM,MYL6,PAFAH1B1,PDGFRB,PFN1,PFN2,PLEKHO1,POSTN,PPIA,PREX1,RHOG,SDC3,SDCBP,SHC1,SKI,SLC7A7,SRGAP2B,TGFB1I1,THBS4,THY1,TIMP1,TMOD1,TMSB10,TMS…
GO:BP	skeletal system development	GO:0001501	1.01166e-08	7.99496	524	241	31	17847	ACVRL1,ANXA2,BGN,CDKN1C,CHSY1,COL1A1,COL1A2,COL3A1,COL5A2,COL6A1,COL6A2,COL6A3,CTSK,EFEMP1,FBN1,FOXN3,GJA1,HIF1A,HOXC6,MIR21,MMP2,PAFAH1B1,PAPSS1,PPIB,SERPINH1,SFRP4,SH3PXD2B,SKI,TGFBI,TIMP1,VCAN
GO:BP	response to chemical	GO:0042221	1.14658e-08	7.9406	4841	241	115	17847	ACKR1,ACTB,ACVRL1,ADIPOR2,AKT1,ANXA1,ANXA2,ANXA5,APOE,ARHGDIA,ARPC1B,BAG3,BCAP31,C1QA,CAPZA1,CCND3,CCR5,CD14,CDKN1B,CDKN1C,CFL1,CLEC3B,CMTM3,CNP,COL1A1,COL1A2,COL3A1,COL5A2,COL6A1,COL6A2,COLEC12,CPNE2,CRIP1,CXCL16,CYB5R3,DAB2,DUSP6,FBN1,FLNA,FN1,FSTL1,GJA1,GNAI2,GPX1,GSTM1,GSTM2,HIF1A,HLA-E,HSD3B7,HSPA9,IGHG1,LAMB2,LAPTM5,LGMN,LOXL1,MAPT,MIR21,MKNK2,MMP2,MSN,MT1E,MT1F,MT1G,MT1H,MT1HL1,MT2A,MTUS1,…
GO:BP	anatomical structure development	GO:0048856	2.87852e-08	7.54083	6028	241	132	17847	ACTB,ACVRL1,ADAP2,ADIPOR2,AKNA,AKT1,ANXA1,ANXA2,AP2M1,APOE,ARHGDIA,ARHGDIB,BACE2,BAG3,BGN,C1QA,C1QC,CD248,CDC25B,CDC42EP5,CDKN1B,CDKN1C,CFL1,CHSY1,CLEC3B,CLTCL1,CMTM3,CNP,COL1A1,COL1A2,COL3A1,COL5A1,COL5A2,COL6A1,COL6A2,COL6A3,CRIP1,CRIP2,CTSK,DAB2,DUSP6,DYNLL1,EFEMP1,FAT1,FBN1,FLNA,FN1,FOXN3,FSTL1,FXR1,GJA1,GLIS2,GPX1,GRN,HIF1A,HLA-E,HOXC6,HSPA9,LAMB2,LOXL1,MAFB,MAPT,MEST,MIR21,MIR22,MKNK2,MMP2,…
GO:BP	immune system process	GO:0002376	3.11069e-08	7.50714	3214	241	87	17847	ACTB,AKT1,ANXA1,ANXA2,AP2M1,APOE,ARHGAP9,ARPC1B,ATP1B3,BCAP31,C1QA,C1QC,C4A,CAPZA1,CCND3,CCR5,CD14,CD248,CD99,CDKN1C,CMTM3,COL1A1,COL1A2,COL3A1,COLEC12,CRIP1,CRIP2,CTSK,CXCL16,CYB5R3,DYNLL1,FBN1,FCGRT,FLNA,FN1,FTL,G3BP2,GHDC,GPX1,GRN,HCST,HIF1A,HLA-E,HSD3B7,HSPA9,ICAM2,IGHG1,IGKV1-17,LGMN,MAFB,MAPT,MIR21,MKNK2,MSN,MSRB1,MT1G,MT2A,MTUS1,NFE2L1,PAFAH1B1,PDGFRB,PIK3AP1,PLA2G2A,PLEKHO2,PPIA,PRELID1,P…
GO:BP	localization	GO:0051179	4.30579e-08	7.36595	6824	241	143	17847	ACTB,ACVRL1,ADIPOR2,AKT1,ANXA1,ANXA2,ANXA5,AP2M1,APOE,ARF3,ARHGAP9,ARHGDIA,ARHGDIB,ARPC1B,ATP1B3,BAG3,BCAP31,C4A,CAPZA1,CCR5,CD14,CD248,CD99,CDKN1B,CFL1,CLEC3B,CLIC1,CLIP1,CLTCL1,CNP,COL1A1,COL1A2,COL3A1,COL5A1,COLEC12,COX10,COX6A1,CXCL16,CYB5R3,DAB2,DYNLL1,FAT1,FBN1,FCGRT,FLNA,FN1,FTL,FXYD5,FYCO1,G3BP2,GHDC,GJA1,GLIS2,GNAI2,GPX1,GRN,GSTM2,HIF1A,HLA-E,HSD3B7,HSPA9,IGHG1,IGKV1-17,KPNA1,LAMB2,LASP1…
GO:BP	cellular response to organic substance	GO:0071310	4.61693e-08	7.33565	2788	241	79	17847	ACKR1,ACTB,ACVRL1,ADIPOR2,AKT1,ANXA1,ANXA2,ANXA5,ARHGDIA,BAG3,CAPZA1,CCND3,CCR5,CD14,CDKN1B,CDKN1C,CFL1,CLEC3B,COL1A1,COL1A2,COL3A1,COL5A2,COL6A1,COLEC12,DAB2,FBN1,FLNA,FN1,FSTL1,GJA1,GNAI2,GSTM2,HIF1A,HLA-E,HSPA9,IGHG1,LAPTM5,LGMN,MAPT,MIR21,MMP2,MSN,MT1G,MT2A,NFE2L1,NRIP1,PAFAH1B1,PCOLCE,PDE2A,PDGFRB,PLOD3,PLP2,POSTN,PPIA,PSMA7,PSMC1,RAB31,RAB8A,SDCBP,SESN1,SFRP4,SHC1,SIDT2,SKI,SOCS3,SREBF1,TBC…
GO:BP	response to stress	GO:0006950	6.34576e-08	7.19752	4085	241	101	17847	ACKR1,ACTB,ACVRL1,ADIPOR2,AKAP1,AKNA,AKT1,ANXA1,ANXA2,ANXA5,APOE,BACE2,BAG3,BCAP31,C1QA,C1QC,C4A,CAPZA1,CCR5,CD14,CDC42EP5,CDKN1B,CLIC1,COL1A1,COL1A2,COL3A1,COL5A1,COLEC12,CRIP1,CTSK,CXCL16,DUSP6,FLNA,FN1,FOXN3,FSTL1,FXR1,G3BP2,GJA1,GPX1,GRN,GSTM1,GSTM2,HIF1A,HLA-E,HSPA9,ICAM2,IGFBP4,IGHG1,LAMB2,LGMN,MAPT,METRNL,MIR21,MIR22,MMP2,MSRB1,MT1E,MT1F,MT1G,MT1H,MT1HL1,MT2A,NFE2L1,OS9,PAFAH1B1,PDE2A,PDGF…
GO:BP	tissue development	GO:0009888	9.36486e-08	7.0285	2080	241	65	17847	ACVRL1,AKNA,AKT1,ANXA1,ANXA2,AP2M1,BGN,CDKN1B,CDKN1C,CFL1,CHSY1,CLEC3B,COL1A1,COL1A2,COL3A1,COL5A1,COL5A2,COL6A1,COL6A2,COL6A3,CRIP1,CTSK,DAB2,EFEMP1,FAT1,FLNA,FN1,GJA1,GPX1,HIF1A,LAMB2,MEST,MIR21,MMP2,MSN,MYADM,MYL6,PAFAH1B1,PDE2A,PDGFRB,PFN1,PLOD3,POPDC3,POSTN,PPP1CA,PPP2R3A,PSMA7,PSMC1,S100A4,SDCBP,SERPINH1,SFRP4,SH3PXD2B,SIDT2,SKI,SLC20A1,SOCS3,TAGLN2,TCIRG1,TGFB1I1,TGFBI,TIMP1,TMOD1,VEZF1,WAS
GO:BP	multicellular organism development	GO:0007275	1.19474e-07	6.92273	5532	241	123	17847	ACTB,ACVRL1,ADAP2,ADIPOR2,AKNA,AKT1,ANXA1,ANXA2,AP2M1,APOE,ARHGDIA,ARHGDIB,BACE2,BAG3,BGN,C1QA,C1QC,CD248,CDKN1B,CDKN1C,CFL1,CHSY1,CLEC3B,CMTM3,CNP,COL1A1,COL1A2,COL3A1,COL5A1,COL5A2,COL6A1,COL6A2,COL6A3,CRIP1,CRIP2,CTSK,DAB2,DUSP6,DYNLL1,EFEMP1,FAT1,FBN1,FLNA,FN1,FOXN3,FSTL1,FXR1,GJA1,GLIS2,GPX1,GRN,HIF1A,HLA-E,HOXC6,HSPA9,LAMB2,LOXL1,MAFB,MAPT,MIR21,MIR22,MKNK2,MMP2,MSN,MT1G,MYADM,MYL6,NFE2L1,N…
GO:BP	system development	GO:0048731	1.63852e-07	6.78555	4967	241	114	17847	ACTB,ACVRL1,ADAP2,ADIPOR2,AKNA,AKT1,ANXA1,ANXA2,AP2M1,APOE,ARHGDIA,BACE2,BAG3,BGN,C1QA,C1QC,CD248,CDKN1B,CDKN1C,CFL1,CHSY1,CLEC3B,CNP,COL1A1,COL1A2,COL3A1,COL5A1,COL5A2,COL6A1,COL6A2,COL6A3,CRIP1,CRIP2,CTSK,DAB2,DUSP6,DYNLL1,EFEMP1,FAT1,FBN1,FLNA,FN1,FOXN3,FXR1,GJA1,GLIS2,GPX1,GRN,HIF1A,HLA-E,HOXC6,HSPA9,LAMB2,LOXL1,MAFB,MAPT,MIR21,MIR22,MKNK2,MMP2,MSN,MT1G,MYL6,NFE2L1,NRIP1,PAFAH1B1,PAPSS1,PDE2A…
GO:BP	response to stimulus	GO:0050896	1.34272e-06	5.87201	9379	241	173	17847	ACKR1,ACTB,ACVRL1,ADIPOR2,AKAP1,AKNA,AKT1,ANXA1,ANXA2,ANXA5,AP2M1,APOE,ARHGAP9,ARHGDIA,ARHGDIB,ARPC1B,BACE2,BAG3,BCAP31,C1QA,C1QC,C4A,CAPZA1,CCDC80,CCND3,CCR5,CD14,CD99,CDC42EP5,CDKN1B,CDKN1C,CFL1,CHSY1,CLEC3B,CLIC1,CMTM3,CNP,COL1A1,COL1A2,COL3A1,COL5A1,COL5A2,COL6A1,COL6A2,COLEC12,CPNE2,CRIP1,CTSK,CXCL16,CYB5R3,DAB2,DUSP6,DYNLL1,EFEMP1,FBN1,FCGRT,FLNA,FN1,FOXN3,FSTL1,FTL,FXR1,G3BP2,GHDC,GJA1,GLI…
GO:BP	cell adhesion	GO:0007155	1.70782e-06	5.76756	1421	241	49	17847	ACTB,ACVRL1,AKNA,AKT1,ANXA1,ANXA2,ARHGDIA,ARHGDIB,CCDC80,CD99,CLIC1,COL1A1,COL3A1,COL5A1,COL6A1,COL6A2,COL6A3,FAT1,FBLN2,FBN1,FLNA,FN1,FXYD5,HLA-E,ICAM2,LAMB2,MIR21,MSN,MYADM,PCDHGA1,PIEZO1,PLA2G2A,POSTN,PPP1CA,PREX1,S100A10,S100A11,SHC1,SIGLEC1,STAB1,TGFB1I1,TGFBI,THBS2,THBS4,THY1,VAMP3,VCAN,VSIG4,ZYX
GO:BP	biological adhesion	GO:0022610	2.01459e-06	5.69581	1428	241	49	17847	ACTB,ACVRL1,AKNA,AKT1,ANXA1,ANXA2,ARHGDIA,ARHGDIB,CCDC80,CD99,CLIC1,COL1A1,COL3A1,COL5A1,COL6A1,COL6A2,COL6A3,FAT1,FBLN2,FBN1,FLNA,FN1,FXYD5,HLA-E,ICAM2,LAMB2,MIR21,MSN,MYADM,PCDHGA1,PIEZO1,PLA2G2A,POSTN,PPP1CA,PREX1,S100A10,S100A11,SHC1,SIGLEC1,STAB1,TGFB1I1,TGFBI,THBS2,THBS4,THY1,VAMP3,VCAN,VSIG4,ZYX
GO:BP	response to external stimulus	GO:0009605	4.30889e-06	5.36563	2887	241	76	17847	ADIPOR2,AKNA,AKT1,ANXA1,ANXA2,ANXA5,APOE,ARHGDIA,BAG3,C1QA,C1QC,C4A,CAPZA1,CCDC80,CCR5,CD14,CDKN1B,CFL1,CHSY1,CMTM3,CNP,COL1A1,COL3A1,COLEC12,CTSK,CXCL16,FLNA,FSTL1,G3BP2,GJA1,GNAI2,GPX1,GRN,HLA-E,HSD3B7,ICAM2,IGHG1,LAMB2,LGMN,LOXL1,METRNL,MIR21,MIR22,MSRB1,MT2A,MTUS1,NFE2L1,PDE2A,PDGFRB,PIEZO1,PIK3AP1,PLA2G2A,PLP2,POSTN,PPP1CA,PREX1,PSMA7,PSMC1,RHOG,SERPING1,SESN1,SHC1,SOCS3,SREBF1,STAB1,THBS4,T…
GO:BP	regulation of organelle organization	GO:0033043	5.85569e-06	5.23242	1284	241	45	17847	AKT1,ANXA1,ANXA2,ARHGDIA,ARHGDIB,ARPC1B,BAG3,CAPZA1,CDC42EP5,CDKN1B,CDKN1C,CFL1,CLIP1,FLNA,FYCO1,G3BP2,GPX1,GRN,HIF1A,LIMA1,MAPT,MIR21,MSN,MYADM,NFE2L1,PAFAH1B1,PDE2A,PDGFRB,PFN1,PFN2,PRELID1,PREX1,PTTG1,RHOG,S100A10,SDCBP,SH3PXD2B,SKI,SREBF1,TBC1D4,TMOD1,TMSB10,TMSB4X,TSPO,WAS
GO:BP	regulation of supramolecular fiber organization	GO:1902903	6.50304e-06	5.18688	355	241	22	17847	APOE,ARPC1B,CAPZA1,CDC42EP5,CDKN1B,CFL1,CLIP1,FLNA,GPX1,LIMA1,MAPT,MIR21,MYADM,PFN1,PFN2,PREX1,S100A10,SH3PXD2B,TMOD1,TMSB10,TMSB4X,WAS
GO:BP	response to endogenous stimulus	GO:0009719	7.86018e-06	5.10457	1736	241	54	17847	ACTB,ACVRL1,ADIPOR2,AKT1,ANXA1,ANXA2,ANXA5,APOE,ARPC1B,CCND3,CDKN1B,CDKN1C,CLEC3B,COL1A1,COL1A2,COL3A1,COL5A2,COL6A1,DAB2,FBN1,FLNA,FSTL1,GJA1,GNAI2,GSTM2,LGMN,MAPT,MIR21,MMP2,MSN,MXRA5,NRIP1,PDE2A,PDGFRB,PLOD3,POSTN,RAB31,RAB8A,SDCBP,SESN1,SFRP4,SHC1,SKI,SOCS3,SREBF1,STEAP2,TBC1D4,TCIRG1,TGFB1I1,TIMP1,TSPO,UCP2,UFSP2,ZYX
GO:BP	regulation of response to stimulus	GO:0048583	7.9455e-06	5.09988	4370	241	100	17847	ACTB,ACVRL1,AKAP1,AKNA,AKT1,ANXA1,ANXA2,ANXA5,APOE,ARHGAP9,ARHGDIA,ARHGDIB,ARPC1B,BAG3,BCAP31,C1QA,C1QC,C4A,CCND3,CD14,CD99,CDKN1B,CDKN1C,CHSY1,CMTM3,COL1A1,COL1A2,COL3A1,COLEC12,CTSK,DAB2,DUSP6,FBN1,FCGRT,FLNA,FN1,FSTL1,FXR1,G3BP2,GJA1,GLIS2,GNAI2,GPX1,GRN,GSTM2,HCST,HIF1A,HLA-E,ICAM2,IGFBP4,IGHG1,IGKV1-17,LASP1,LGMN,LY6E,MAPT,METRNL,MIR21,MIR22,MTUS1,MYADM,NFE2L1,OS9,PAFAH1B1,PDE2A,PDGFRB,PIK3A…
GO:BP	regulation of anatomical structure size	GO:0090066	1.28222e-05	4.89204	508	241	26	17847	AKT1,AP2M1,APOE,ARPC1B,CAPZA1,CDC42EP5,CFL1,FN1,GJA1,GPX1,LIMA1,MAPT,MIR21,MSN,MYADM,PAFAH1B1,PFN1,PFN2,PLOD3,PPP1CA,PREX1,SLC12A7,TMOD1,TMSB10,TMSB4X,WAS
GO:BP	regulation of biological quality	GO:0065008	1.43391e-05	4.84348	4103	241	95	17847	ACTB,ACVRL1,ADIPOR2,AKAP1,AKT1,ANXA1,ANXA2,ANXA5,AP2M1,APOE,ARHGDIA,ARPC1B,ATP1B3,BACE2,BAG3,BCAP31,CAPZA1,CCR5,CDC42EP5,CFL1,CLIC1,CNP,COL1A1,COL1A2,COL3A1,CTSK,FBN1,FLNA,FN1,FTL,FXR1,G3BP2,GJA1,GNAI2,GPX1,GRN,GSTM2,HIF1A,HSPA9,LGMN,LIMA1,MAFB,MAPT,MEST,METRNL,MIR21,MSN,MT1E,MT1F,MT1G,MT1H,MT1HL1,MT2A,MYADM,NFE2L1,NRIP1,OS9,PAFAH1B1,PDE2A,PFN1,PFN2,PIEZO1,PLEKHO1,PLOD3,POPDC3,POSTN,PPIB,PPP1CA,P…
GO:BP	regulation of cellular component size	GO:0032535	1.4592e-05	4.83588	371	241	22	17847	AKT1,AP2M1,APOE,ARPC1B,CAPZA1,CDC42EP5,CFL1,FN1,LIMA1,MAPT,MSN,MYADM,PAFAH1B1,PFN1,PFN2,PPP1CA,PREX1,SLC12A7,TMOD1,TMSB10,TMSB4X,WAS
GO:BP	connective tissue development	GO:0061448	1.66568e-05	4.77841	278	241	19	17847	ACVRL1,ANXA2,BGN,CHSY1,COL1A1,COL5A1,COL6A1,COL6A2,COL6A3,CRIP1,CTSK,EFEMP1,HIF1A,MIR21,PDGFRB,SERPINH1,SH3PXD2B,TGFBI,TIMP1
GO:BP	actin cytoskeleton organization	GO:0030036	1.78577e-05	4.74818	670	241	30	17847	ACTB,ANXA1,ARHGDIA,ARHGDIB,ARPC1B,CAPZA1,CDC42EP5,CFL1,FAT1,FLNA,LIMA1,MIR21,MSRB1,MYADM,PAFAH1B1,PDGFRB,PFN1,PFN2,PREX1,RHOG,S100A10,SDCBP,SH3PXD2B,SHC1,TMOD1,TMSB10,TMSB4X,TNIK,WAS,ZYX
GO:BP	animal organ development	GO:0048513	1.92997e-05	4.71445	3635	241	87	17847	ACTB,ACVRL1,ADAP2,ADIPOR2,AKNA,AKT1,ANXA1,ANXA2,AP2M1,BAG3,BGN,C1QC,CD248,CDKN1B,CDKN1C,CFL1,CHSY1,CLEC3B,CNP,COL1A1,COL1A2,COL3A1,COL5A1,COL5A2,COL6A1,COL6A2,COL6A3,CRIP1,CRIP2,CTSK,DAB2,DUSP6,DYNLL1,EFEMP1,FAT1,FBN1,FLNA,FN1,FOXN3,FXR1,GJA1,GLIS2,GPX1,HIF1A,HSPA9,LAMB2,MAFB,MIR21,MKNK2,MMP2,MSN,MT1G,MYL6,NFE2L1,NRIP1,PAFAH1B1,PDE2A,PDGFRB,PFN1,PLOD3,POPDC3,PPIB,PPP1CA,PRELID1,PREX1,PSMA7,PSMC1,…
GO:BP	regulation of cellular component movement	GO:0051270	2.22905e-05	4.65188	1107	241	40	17847	ACVRL1,AKT1,ANXA1,ANXA5,APOE,ARHGDIA,ARHGDIB,CD99,CDKN1B,COL1A1,COL3A1,CXCL16,DAB2,FLNA,FN1,GJA1,GNAI2,GRN,HIF1A,LGMN,MIR21,MIR22,MSN,MTUS1,MYADM,PDGFRB,PFN1,PFN2,POSTN,PREX1,RHOG,SDCBP,SRGAP2B,THBS4,THY1,TIMP1,TMSB10,TMSB4X,WAS,ZSWIM6
GO:BP	cellular response to zinc ion	GO:0071294	2.24365e-05	4.64905	22	241	7	17847	MT1E,MT1F,MT1G,MT1H,MT1HL1,MT2A,TSPO
GO:BP	regulation of cell motility	GO:2000145	2.37601e-05	4.62415	1019	241	38	17847	ACVRL1,AKT1,ANXA1,ANXA5,APOE,ARHGDIA,ARHGDIB,CD99,COL1A1,COL3A1,CXCL16,DAB2,FLNA,FN1,GJA1,GNAI2,GRN,HIF1A,LGMN,MIR21,MIR22,MSN,MTUS1,MYADM,PDGFRB,PFN1,PFN2,POSTN,PREX1,RHOG,SDCBP,SRGAP2B,THBS4,THY1,TIMP1,TMSB10,TMSB4X,WAS
GO:BP	regulation of cellular component organization	GO:0051128	2.37771e-05	4.62384	2488	241	67	17847	ACVRL1,ADIPOR2,AKT1,ANXA1,ANXA2,AP2M1,APOE,ARHGDIA,ARHGDIB,ARPC1B,BAG3,CAPZA1,CD14,CDC42EP5,CDKN1B,CDKN1C,CFL1,CLIP1,COL5A1,CXCL16,DAB2,FLNA,FN1,FXR1,FYCO1,G3BP2,GJA1,GPX1,GRN,HIF1A,IGFBP4,LIMA1,MAPT,MIR21,MSN,MYADM,NFE2L1,PAFAH1B1,PDE2A,PDGFRB,PFN1,PFN2,PIEZO1,PLEKHO1,POSTN,PRELID1,PREX1,PTTG1,RAB31,RHOG,S100A10,SDCBP,SFRP4,SH3PXD2B,SKI,SREBF1,TBC1D4,THBS2,THY1,TMOD1,TMSB10,TMSB4X,TNIK,TSPO,TUBA…
GO:BP	regulation of actin cytoskeleton organization	GO:0032956	2.40498e-05	4.61889	348	241	21	17847	ARHGDIA,ARHGDIB,ARPC1B,CAPZA1,CDC42EP5,CFL1,FLNA,LIMA1,MIR21,MYADM,PDGFRB,PFN1,PFN2,PREX1,RHOG,S100A10,SH3PXD2B,TMOD1,TMSB10,TMSB4X,WAS
GO:BP	inflammatory response	GO:0006954	2.76891e-05	4.55769	765	241	32	17847	ACKR1,AKNA,AKT1,ANXA1,APOE,BACE2,C1QA,C4A,CCR5,CD14,FN1,GJA1,GPX1,GRN,HIF1A,HLA-E,IGFBP4,MAPT,METRNL,MIR21,MIR22,NFE2L1,PDE2A,PIK3AP1,PLA2G2A,SIGLEC1,SOCS3,STAB1,TCIRG1,TIMP1,TMSB4X,ZYX
GO:BP	multicellular organismal process	GO:0032501	3.247e-05	4.48852	7775	241	148	17847	ACKR1,ACTB,ACVRL1,ADAP2,ADIPOR2,AKAP1,AKNA,AKT1,ANXA1,ANXA2,ANXA5,AP2M1,APOE,ARHGDIA,ARHGDIB,ATP1B3,BACE2,BAG3,BCAP31,BGN,BRD2,C1QA,C1QC,CAPZA1,CD14,CD248,CDC25B,CDKN1B,CDKN1C,CFL1,CHSY1,CLEC3B,CLIC1,CMTM3,CNP,COL1A1,COL1A2,COL3A1,COL5A1,COL5A2,COL6A1,COL6A2,COL6A3,CRIP1,CRIP2,CTSK,CYB5R3,DAB2,DUSP6,DYNLL1,EFEMP1,FAT1,FBN1,FLNA,FN1,FOXN3,FSTL1,FXR1,GJA1,GLIS2,GNAI2,GPX1,GRN,GSTM2,HIF1A,HLA-E,HOXC…
GO:BP	detoxification of copper ion	GO:0010273	3.25633e-05	4.48727	14	241	6	17847	MT1E,MT1F,MT1G,MT1H,MT1HL1,MT2A
GO:BP	stress response to copper ion	GO:1990169	3.25633e-05	4.48727	14	241	6	17847	MT1E,MT1F,MT1G,MT1H,MT1HL1,MT2A
GO:BP	actin filament-based process	GO:0030029	3.32978e-05	4.47758	771	241	32	17847	ACTB,ANXA1,ARHGDIA,ARHGDIB,ARPC1B,CAPZA1,CDC42EP5,CFL1,FAT1,FLNA,GJA1,LIMA1,MIR21,MSRB1,MYADM,MYL6,PAFAH1B1,PDGFRB,PFN1,PFN2,PREX1,RHOG,S100A10,SDCBP,SH3PXD2B,SHC1,TMOD1,TMSB10,TMSB4X,TNIK,WAS,ZYX
GO:BP	defense response	GO:0006952	3.4487e-05	4.46235	1760	241	53	17847	ACKR1,AKNA,AKT1,ANXA1,APOE,BACE2,C1QA,C1QC,C4A,CAPZA1,CCR5,CD14,COLEC12,CTSK,CXCL16,FLNA,FN1,G3BP2,GJA1,GPX1,GRN,HIF1A,HLA-E,ICAM2,IGFBP4,IGHG1,LGMN,MAPT,METRNL,MIR21,MIR22,MSRB1,MT2A,NFE2L1,PDE2A,PIK3AP1,PLA2G2A,PSMA7,PSMC1,SERPING1,SHC1,SIGLEC1,SOCS3,STAB1,TCIRG1,TIMP1,TMEM173,TMSB4X,VAMP3,VEZF1,VSIG4,WAS,ZYX
GO:BP	positive regulation of response to stimulus	GO:0048584	3.61035e-05	4.44245	2514	241	67	17847	ACTB,ACVRL1,AKT1,ANXA1,APOE,ARPC1B,BCAP31,C1QA,C1QC,C4A,CD14,CDKN1C,CHSY1,CMTM3,COL1A1,COL3A1,COLEC12,CTSK,DAB2,DUSP6,FCGRT,FLNA,FXR1,G3BP2,GJA1,GNAI2,GPX1,GRN,GSTM2,HCST,HIF1A,HLA-E,ICAM2,IGFBP4,IGHG1,IGKV1-17,LASP1,LGMN,MIR21,MIR22,PAFAH1B1,PDE2A,PDGFRB,PIK3AP1,PLA2G2A,PPP1CA,PSMA7,PSMC1,RHOG,S100A4,SDCBP,SERPING1,SFRP4,SHC1,SKI,SLC20A1,SOCS3,TGFB1I1,THBS4,THY1,TMEM173,TMSB4X,TNIK,TSPAN14,USP13…
GO:BP	positive regulation of biological process	GO:0048518	3.77912e-05	4.42261	6290	241	127	17847	ACTB,ACVRL1,ADIPOR2,AKNA,AKT1,ANXA1,ANXA2,ANXA5,AP2M1,APOE,ARHGDIA,ARPC1B,ATP1B3,BAG3,BCAP31,C1QA,C1QC,C4A,CCDC80,CCND3,CD14,CD248,CD99,CDC25B,CDC42EP5,CDKN1B,CDKN1C,CFL1,CHSY1,CLEC3B,CLIC1,CLIP1,CLTCL1,CMTM3,COL1A1,COL3A1,COLEC12,CRIP2,CTSK,CXCL16,DAB2,DUSP6,FBLN2,FCGRT,FLNA,FN1,FXR1,FYCO1,G3BP2,GJA1,GLIS2,GNAI2,GPX1,GRN,GSTM2,HCST,HIF1A,HLA-E,ICAM2,IGFBP4,IGHG1,IGKV1-17,LASP1,LGMN,MAFB,MAPT,MAR…
GO:BP	regulation of locomotion	GO:0040012	4.57285e-05	4.33981	1090	241	39	17847	ACVRL1,AKT1,ANXA1,ANXA5,APOE,ARHGDIA,ARHGDIB,CD99,COL1A1,COL3A1,CXCL16,DAB2,FLNA,FN1,GJA1,GNAI2,GRN,HIF1A,LGMN,MIR21,MIR22,MSN,MTUS1,MYADM,PDGFRB,PFN1,PFN2,POSTN,PREX1,RHOG,SDCBP,SRGAP2B,THBS4,THY1,TIMP1,TMSB10,TMSB4X,WAS,ZSWIM6
GO:BP	regulation of cell migration	GO:0030334	4.88136e-05	4.31146	957	241	36	17847	ACVRL1,AKT1,ANXA1,APOE,ARHGDIA,ARHGDIB,CD99,COL1A1,COL3A1,CXCL16,DAB2,FLNA,FN1,GJA1,GNAI2,GRN,HIF1A,LGMN,MIR21,MIR22,MSN,MTUS1,MYADM,PDGFRB,PFN1,PFN2,POSTN,PREX1,RHOG,SDCBP,SRGAP2B,THBS4,THY1,TIMP1,TMSB10,TMSB4X
GO:BP	cell differentiation	GO:0030154	5.98102e-05	4.22322	4279	241	96	17847	ACTB,ACVRL1,AKNA,AKT1,ANXA1,ANXA2,APOE,ARHGDIA,BACE2,C1QA,C1QC,CDC25B,CDKN1B,CDKN1C,CFL1,CHSY1,CLIC1,CNP,COL1A1,COL3A1,COL5A1,COL5A2,COL6A1,COL6A2,COL6A3,CTSK,DAB2,DUSP6,EFEMP1,FAT1,FBN1,FLNA,FN1,FSTL1,FXR1,GJA1,GLIS2,GPX1,GRN,HIF1A,HSPA9,LAMB2,MAFB,MAPT,METRNL,MIR21,MIR22,MMP2,MRC2,MSN,MT1G,MYADM,NFE2L1,PAFAH1B1,PDE2A,PDGFRB,PLA2G2A,PLEKHO1,PLOD3,POPDC3,POSTN,PRELID1,PREX1,PSMA7,PSMC1,RAB8A,RHOG…
GO:BP	detoxification of inorganic compound	GO:0061687	8.48889e-05	4.07115	16	241	6	17847	MT1E,MT1F,MT1G,MT1H,MT1HL1,MT2A
GO:BP	stress response to metal ion	GO:0097501	8.48889e-05	4.07115	16	241	6	17847	MT1E,MT1F,MT1G,MT1H,MT1HL1,MT2A
GO:BP	cellular component organization	GO:0016043	0.000101855	3.99202	6454	241	128	17847	ACTB,ACVRL1,ADIPOR2,AKT1,ANXA1,ANXA2,AP2M1,APOE,ARHGDIA,ARHGDIB,ARPC1B,BAG3,BGN,BRD2,C1QA,C1QC,CAPZA1,CCDC80,CCR5,CD14,CDC25B,CDC42EP5,CDKN1B,CDKN1C,CFL1,CLIP1,CLTCL1,CNP,COL1A1,COL1A2,COL3A1,COL5A1,COL5A2,COL6A1,COL6A2,COL6A3,COLEC12,COX10,CTSK,CXCL16,DAB2,DYNLL1,EIF5,EMP3,FAT1,FBLN2,FBN1,FLNA,FN1,FXR1,FXYD5,FYCO1,G3BP2,GJA1,GPX1,GRN,HIF1A,HSPA9,ICAM2,IGFBP4,IGHG1,KPNA1,LAMB2,LGMN,LIMA1,LOXL1,MA…
GO:BP	bone development	GO:0060348	0.000110693	3.95588	220	241	16	17847	ANXA2,BGN,CHSY1,COL1A1,COL6A1,COL6A2,COL6A3,FBN1,FOXN3,GJA1,PAFAH1B1,PPIB,SERPINH1,SFRP4,SH3PXD2B,SKI
GO:BP	cellular response to endogenous stimulus	GO:0071495	0.000110934	3.95494	1465	241	46	17847	ACTB,ACVRL1,ADIPOR2,AKT1,ANXA1,ANXA5,CCND3,CDKN1C,CLEC3B,COL1A1,COL1A2,COL3A1,COL5A2,COL6A1,DAB2,FBN1,FLNA,FSTL1,GJA1,GNAI2,GSTM2,LGMN,MAPT,MIR21,MMP2,MSN,NRIP1,PDE2A,PDGFRB,PLOD3,POSTN,RAB31,RAB8A,SDCBP,SESN1,SFRP4,SHC1,SKI,SOCS3,SREBF1,TBC1D4,TCIRG1,TGFB1I1,UCP2,UFSP2,ZYX
GO:BP	blood vessel development	GO:0001568	0.000113897	3.94349	770	241	31	17847	ACVRL1,ADIPOR2,AKT1,ANXA1,ANXA2,APOE,COL1A1,COL1A2,COL3A1,COL5A1,FN1,GPX1,GRN,HIF1A,LOXL1,MIR21,MIR22,MMP2,PDE2A,PDGFRB,SAT1,SHC1,SOCS3,STAB1,TGFBI,THBS2,THBS4,THY1,TNFAIP2,TYMP,VEZF1
GO:BP	response to inorganic substance	GO:0010035	0.000131628	3.88065	570	241	26	17847	AKT1,ANXA1,ANXA5,C1QA,CD14,CDKN1B,COL1A1,CPNE2,CRIP1,GPX1,HIF1A,LGMN,MAPT,MIR21,MT1E,MT1F,MT1G,MT1H,MT1HL1,MT2A,NFE2L1,PDGFRB,PPP1CA,TCIRG1,TSPO,UCP2
GO:BP	response to wounding	GO:0009611	0.000135949	3.86662	692	241	29	17847	ACTB,ACVRL1,ADIPOR2,AKAP1,ANXA1,ANXA2,ANXA5,APOE,CAPZA1,CDKN1B,CLIC1,COL1A1,COL1A2,COL3A1,COL5A1,FLNA,FN1,GJA1,GPX1,GRN,HIF1A,LAMB2,MIR21,PDGFRB,POSTN,SERPING1,TIMP1,TSPO,WAS
GO:BP	cellular response to copper ion	GO:0071280	0.000145371	3.83752	28	241	7	17847	MT1E,MT1F,MT1G,MT1H,MT1HL1,MT2A,NFE2L1
GO:BP	regulation of localization	GO:0032879	0.000148255	3.82899	2893	241	72	17847	ACTB,ACVRL1,ADIPOR2,AKT1,ANXA1,ANXA2,ANXA5,AP2M1,APOE,ARHGDIA,ARHGDIB,ATP1B3,BAG3,BCAP31,C4A,CCR5,CD14,CD99,CDKN1B,CLIC1,CLTCL1,COL1A1,COL3A1,CXCL16,DAB2,FLNA,FN1,FXYD5,GJA1,GLIS2,GNAI2,GRN,GSTM2,HIF1A,HLA-E,LGMN,MAPT,MEST,MIR21,MIR22,MSN,MTUS1,MYADM,OS9,PDGFRB,PFN1,PFN2,POSTN,PPIA,PRELID1,PREX1,RAB31,RAB8A,RHOG,SDCBP,SFRP4,SIDT2,SREBF1,SRGAP2B,TBC1D4,TCIRG1,THBS4,THY1,TIMP1,TMSB10,TMSB4X,TSPAN13…
GO:BP	regulation of developmental process	GO:0050793	0.000169326	3.77128	2729	241	69	17847	ACVRL1,AKT1,ANXA1,ANXA2,AP2M1,APOE,ARHGDIA,ARHGDIB,C1QC,CDC42EP5,CDKN1B,CDKN1C,CFL1,CLIC1,COL1A1,COL3A1,COL5A1,COL5A2,CTSK,DAB2,DUSP6,EFEMP1,FBN1,FLNA,FN1,GJA1,GPX1,GRN,HIF1A,HSPA9,LGMN,MAFB,MAPT,METRNL,MIR21,MIR22,MSN,MYADM,PAFAH1B1,PDGFRB,PFN1,PLA2G2A,PLEKHO1,POSTN,PPIB,PRELID1,PREX1,PSMA7,PSMC1,RHOG,RNF10,S100A10,SDCBP,SFRP4,SH3PXD2B,SKI,SOCS3,STAB1,TCIRG1,TGFB1I1,THBS2,THBS4,THY1,TIMP1,TNIK,T…
GO:BP	growth	GO:0040007	0.000184431	3.73417	1009	241	36	17847	ACVRL1,ADIPOR2,AKT1,ANXA1,ANXA2,APOE,CDKN1B,CDKN1C,COL6A1,COL6A2,COL6A3,CXCL16,DUSP6,EIF4H,EMP3,FN1,GJA1,GPX1,HIF1A,IGFBP4,LAMB2,LGMN,MAPT,MT1E,MT1F,MT1G,MT1H,MT2A,PAFAH1B1,PDGFRB,POSTN,PPIB,SDCBP,SH3PXD2B,SHC1,SOCS3
GO:BP	regulation of actin filament-based process	GO:0032970	0.000202512	3.69355	394	241	21	17847	ARHGDIA,ARHGDIB,ARPC1B,CAPZA1,CDC42EP5,CFL1,FLNA,LIMA1,MIR21,MYADM,PDGFRB,PFN1,PFN2,PREX1,RHOG,S100A10,SH3PXD2B,TMOD1,TMSB10,TMSB4X,WAS
GO:BP	cellular response to stimulus	GO:0051716	0.000208786	3.6803	7670	241	144	17847	ACKR1,ACTB,ACVRL1,ADIPOR2,AKAP1,AKT1,ANXA1,ANXA2,ANXA5,AP2M1,APOE,ARHGAP9,ARHGDIA,ARHGDIB,ARPC1B,BAG3,BCAP31,CAPZA1,CCND3,CCR5,CD14,CDC42EP5,CDKN1B,CDKN1C,CFL1,CHSY1,CLEC3B,CLIC1,CMTM3,COL1A1,COL1A2,COL3A1,COL5A2,COL6A1,COLEC12,CPNE2,CRIP1,CTSK,CXCL16,CYB5R3,DAB2,DUSP6,EFEMP1,FBN1,FLNA,FN1,FOXN3,FSTL1,FXR1,G3BP2,GJA1,GLIS2,GNAI2,GPX1,GRN,GSTM1,GSTM2,HCST,HIF1A,HLA-E,HSD3B7,HSPA9,ICAM2,IGFBP4,IGHG…
GO:BP	regulation of cytoskeleton organization	GO:0051493	0.000215567	3.66642	545	241	25	17847	ARHGDIA,ARHGDIB,ARPC1B,CAPZA1,CDC42EP5,CDKN1B,CFL1,CLIP1,FLNA,LIMA1,MAPT,MIR21,MYADM,PAFAH1B1,PDGFRB,PFN1,PFN2,PREX1,RHOG,S100A10,SH3PXD2B,TMOD1,TMSB10,TMSB4X,WAS
GO:BP	regulation of actin filament organization	GO:0110053	0.000222218	3.65322	262	241	17	17847	ARPC1B,CAPZA1,CDC42EP5,CFL1,FLNA,LIMA1,MIR21,MYADM,PFN1,PFN2,PREX1,S100A10,SH3PXD2B,TMOD1,TMSB10,TMSB4X,WAS
GO:BP	actin filament organization	GO:0007015	0.000230075	3.63813	397	241	21	17847	ARPC1B,CAPZA1,CDC42EP5,CFL1,FAT1,FLNA,LIMA1,MIR21,MSRB1,MYADM,PFN1,PFN2,PREX1,RHOG,S100A10,SH3PXD2B,TMOD1,TMSB10,TMSB4X,WAS,ZYX
GO:BP	cellular developmental process	GO:0048869	0.000268685	3.57076	4470	241	97	17847	ACTB,ACVRL1,AKNA,AKT1,ANXA1,ANXA2,APOE,ARHGDIA,BACE2,C1QA,C1QC,CDC25B,CDC42EP5,CDKN1B,CDKN1C,CFL1,CHSY1,CLIC1,CNP,COL1A1,COL3A1,COL5A1,COL5A2,COL6A1,COL6A2,COL6A3,CTSK,DAB2,DUSP6,EFEMP1,FAT1,FBN1,FLNA,FN1,FSTL1,FXR1,GJA1,GLIS2,GPX1,GRN,HIF1A,HSPA9,LAMB2,MAFB,MAPT,METRNL,MIR21,MIR22,MMP2,MRC2,MSN,MT1G,MYADM,NFE2L1,PAFAH1B1,PDE2A,PDGFRB,PLA2G2A,PLEKHO1,PLOD3,POPDC3,POSTN,PRELID1,PREX1,PSMA7,PSMC1,R…
GO:BP	response to cytokine	GO:0034097	0.000291764	3.53497	1217	241	40	17847	ACKR1,ADIPOR2,AKT1,ANXA1,ANXA2,CAPZA1,CCR5,CD14,CFL1,COL1A1,COL1A2,COL3A1,CXCL16,FN1,HIF1A,HLA-E,HSPA9,IGHG1,LAPTM5,MIR21,MMP2,MSN,MT2A,PAFAH1B1,PCOLCE,PDE2A,PLP2,POSTN,PPIA,PSMA7,PSMC1,SHC1,SOCS3,TCIRG1,TIMP1,TMSB4X,TUBA1B,VAMP3,WAS,ZYX
GO:BP	regulation of multicellular organismal process	GO:0051239	0.000301831	3.52024	3300	241	78	17847	ACKR1,ACVRL1,ADIPOR2,AKT1,ANXA1,ANXA2,ANXA5,AP2M1,APOE,ARHGDIA,ARHGDIB,ATP1B3,C1QC,CD14,CDKN1B,CDKN1C,CFL1,CHSY1,CLIC1,COL1A1,COL3A1,COL5A1,COL5A2,CTSK,DAB2,DUSP6,EFEMP1,FBN1,FLNA,FN1,GJA1,GNAI2,GPX1,GRN,GSTM2,HIF1A,HLA-E,HSPA9,LGMN,MAFB,MAPT,MIR21,MIR22,MYADM,PAFAH1B1,PDGFRB,PFN1,PFN2,POSTN,PPIB,PRELID1,PREX1,PSMA7,PSMC1,RNF10,SDCBP,SERPING1,SFRP4,SH3PXD2B,SKI,SREBF1,STAB1,TCIRG1,TGFB1I1,THBS2,T…
GO:BP	vasculature development	GO:0001944	0.00030679	3.51316	805	241	31	17847	ACVRL1,ADIPOR2,AKT1,ANXA1,ANXA2,APOE,COL1A1,COL1A2,COL3A1,COL5A1,FN1,GPX1,GRN,HIF1A,LOXL1,MIR21,MIR22,MMP2,PDE2A,PDGFRB,SAT1,SHC1,SOCS3,STAB1,TGFBI,THBS2,THBS4,THY1,TNFAIP2,TYMP,VEZF1
GO:BP	response to metal ion	GO:0010038	0.000344946	3.46225	371	241	20	17847	AKT1,ANXA5,C1QA,CD14,CDKN1B,CPNE2,CRIP1,HIF1A,LGMN,MAPT,MT1E,MT1F,MT1G,MT1H,MT1HL1,MT2A,NFE2L1,PPP1CA,TCIRG1,TSPO
GO:BP	circulatory system development	GO:0072359	0.000379823	3.42042	1181	241	39	17847	ACVRL1,ADAP2,ADIPOR2,AKT1,ANXA1,ANXA2,APOE,CDKN1B,COL1A1,COL1A2,COL3A1,COL5A1,CRIP1,DUSP6,FBN1,FN1,GJA1,GPX1,GRN,HIF1A,LOXL1,MIR21,MIR22,MMP2,PDE2A,PDGFRB,POPDC3,SAT1,SH3PXD2B,SHC1,SOCS3,STAB1,TGFBI,THBS2,THBS4,THY1,TNFAIP2,TYMP,VEZF1
GO:BP	cardiovascular system development	GO:0072358	0.000391826	3.40691	814	241	31	17847	ACVRL1,ADIPOR2,AKT1,ANXA1,ANXA2,APOE,COL1A1,COL1A2,COL3A1,COL5A1,FN1,GPX1,GRN,HIF1A,LOXL1,MIR21,MIR22,MMP2,PDE2A,PDGFRB,SAT1,SHC1,SOCS3,STAB1,TGFBI,THBS2,THBS4,THY1,TNFAIP2,TYMP,VEZF1
GO:BP	cartilage development	GO:0051216	0.000443744	3.35287	213	241	15	17847	ACVRL1,ANXA2,BGN,CHSY1,COL1A1,COL6A1,COL6A2,COL6A3,CTSK,EFEMP1,HIF1A,MIR21,SERPINH1,TGFBI,TIMP1
GO:BP	immune response	GO:0006955	0.000452313	3.34456	2286	241	60	17847	ACTB,ANXA1,ANXA2,APOE,ARHGAP9,ARPC1B,C1QA,C1QC,C4A,CAPZA1,CCR5,CD14,CD99,CMTM3,COL1A1,COL1A2,COL3A1,COLEC12,CRIP1,CTSK,CXCL16,CYB5R3,DYNLL1,FCGRT,FTL,G3BP2,GHDC,GPX1,GRN,HCST,HLA-E,ICAM2,IGHG1,IGKV1-17,LGMN,MIR21,MSRB1,MT2A,PIK3AP1,PLA2G2A,PLEKHO2,PPIA,PRELID1,PSMA7,PSMC1,RAB31,RHOG,S100A11,SDCBP,SERPING1,SHC1,SOCS3,TCIRG1,THY1,TMEM173,TSPAN14,VAMP3,VSIG4,WAS,ZYX
GO:BP	positive regulation of cellular process	GO:0048522	0.000510821	3.29173	5515	241	112	17847	ACVRL1,AKNA,AKT1,ANXA1,ANXA2,ANXA5,AP2M1,APOE,ARHGDIA,ARPC1B,ATP1B3,BAG3,BCAP31,C1QA,CCND3,CD14,CD248,CD99,CDC25B,CDC42EP5,CDKN1B,CDKN1C,CFL1,CHSY1,CLEC3B,CLIC1,CLIP1,CMTM3,COL1A1,COL3A1,COLEC12,CRIP2,CXCL16,DAB2,DUSP6,FLNA,FN1,FXR1,FYCO1,G3BP2,GJA1,GLIS2,GNAI2,GPX1,GRN,GSTM2,HCST,HIF1A,HLA-E,IGFBP4,IGHG1,LASP1,LGMN,MAFB,MAPT,MARCKSL1,METRNL,MIR21,MIR22,MMP2,MSN,MYADM,NFE2L1,NRIP1,PAFAH1B1,PCOLCE…
GO:BP	response to nitrogen compound	GO:1901698	0.000550445	3.25929	1150	241	38	17847	ACTB,AKT1,ANXA1,ANXA5,APOE,BCAP31,CCND3,CDKN1B,CFL1,COL1A1,COL1A2,COL3A1,COL5A2,COL6A1,COLEC12,FBN1,FLNA,GJA1,GNAI2,GSTM1,GSTM2,LGMN,MMP2,OS9,PDE2A,RAB31,RAB8A,SESN1,SHC1,SOCS3,SREBF1,TBC1D4,TCIRG1,TIMP1,TMEM173,TSPO,UCP2,USP13
GO:BP	response to transforming growth factor beta	GO:0071559	0.000606477	3.21719	249	241	16	17847	ACVRL1,CDKN1C,CLEC3B,COL1A1,COL1A2,COL3A1,DAB2,FBN1,MIR21,MXRA5,PDE2A,POSTN,SDCBP,SKI,TGFB1I1,ZYX
GO:BP	wound healing	GO:0042060	0.00061236	3.21299	576	241	25	17847	ACTB,ACVRL1,ADIPOR2,AKAP1,ANXA1,ANXA2,ANXA5,APOE,CAPZA1,CDKN1B,CLIC1,COL1A1,COL1A2,COL3A1,COL5A1,FLNA,FN1,GJA1,GPX1,HIF1A,PDGFRB,POSTN,SERPING1,TIMP1,WAS
GO:BP	cellular component organization or biogenesis	GO:0071840	0.000621252	3.20673	6636	241	128	17847	ACTB,ACVRL1,ADIPOR2,AKT1,ANXA1,ANXA2,AP2M1,APOE,ARHGDIA,ARHGDIB,ARPC1B,BAG3,BGN,BRD2,C1QA,C1QC,CAPZA1,CCDC80,CCR5,CD14,CDC25B,CDC42EP5,CDKN1B,CDKN1C,CFL1,CLIP1,CLTCL1,CNP,COL1A1,COL1A2,COL3A1,COL5A1,COL5A2,COL6A1,COL6A2,COL6A3,COLEC12,COX10,CTSK,CXCL16,DAB2,DYNLL1,EIF5,EMP3,FAT1,FBLN2,FBN1,FLNA,FN1,FXR1,FXYD5,FYCO1,G3BP2,GJA1,GPX1,GRN,HIF1A,HSPA9,ICAM2,IGFBP4,IGHG1,KPNA1,LAMB2,LGMN,LIMA1,LOXL1,MA…
GO:BP	detoxification	GO:0098754	0.000622319	3.20599	135	241	12	17847	APOE,GPX1,GSTM1,GSTM2,MIR21,MT1E,MT1F,MT1G,MT1H,MT1HL1,MT2A,SESN1
GO:BP	cell activation	GO:0001775	0.000659166	3.18101	1455	241	44	17847	ACTB,AKT1,ANXA1,ANXA2,APOE,ARHGAP9,BACE2,C1QA,CCND3,CD14,CLIC1,COL1A1,COL1A2,COL3A1,CYB5R3,DYNLL1,FLNA,FTL,GHDC,GRN,HLA-E,IGHG1,MAFB,MAPT,MIR21,MSN,MT1G,PDGFRB,PLA2G2A,PLEKHO2,PPIA,PRELID1,PREX1,RAB31,RHOG,S100A11,SDCBP,TCIRG1,THY1,TIMP1,TMEM173,TSPAN14,VSIG4,WAS
GO:BP	cellular response to cytokine stimulus	GO:0071345	0.000831918	3.07992	1121	241	37	17847	ACKR1,ADIPOR2,AKT1,ANXA1,ANXA2,CAPZA1,CCR5,CFL1,COL1A1,COL1A2,FN1,HIF1A,HLA-E,HSPA9,IGHG1,LAPTM5,MIR21,MMP2,MSN,MT2A,PAFAH1B1,PCOLCE,PDE2A,PLP2,POSTN,PPIA,PSMA7,PSMC1,SHC1,SOCS3,TCIRG1,TIMP1,TMSB4X,TUBA1B,VAMP3,WAS,ZYX
GO:BP	collagen metabolic process	GO:0032963	0.000934607	3.02937	115	241	11	17847	COL1A1,COL1A2,COL5A1,CTSK,HIF1A,MIR21,MMP2,MRC2,PDGFRB,PLOD3,SERPINH1
GO:BP	cellular response to cadmium ion	GO:0071276	0.000934781	3.02929	36	241	7	17847	AKT1,MT1E,MT1F,MT1G,MT1H,MT1HL1,MT2A
GO:BP	animal organ morphogenesis	GO:0009887	0.000964913	3.01551	1080	241	36	17847	ACVRL1,ANXA2,AP2M1,CHSY1,COL1A1,COL1A2,COL3A1,COL5A1,COL5A2,COL6A1,COL6A2,COL6A3,CRIP1,DAB2,EFEMP1,FAT1,FBN1,FOXN3,HIF1A,LAMB2,MAFB,MIR21,MMP2,MSN,PAFAH1B1,PDGFRB,PFN1,PLOD3,PSMA7,PSMC1,SERPINH1,SFRP4,SH3PXD2B,SKI,TCIRG1,THY1
GO:BP	cellular response to nitrogen compound	GO:1901699	0.00100883	2.99618	718	241	28	17847	ACTB,AKT1,ANXA5,CCND3,COL1A1,COL1A2,COL3A1,COL5A2,COL6A1,COLEC12,FBN1,FLNA,GJA1,GNAI2,GSTM2,LGMN,MMP2,PDE2A,RAB31,RAB8A,SESN1,SHC1,SOCS3,SREBF1,TBC1D4,TCIRG1,TMEM173,UCP2
GO:BP	response to zinc ion	GO:0010043	0.00107632	2.96806	53	241	8	17847	CRIP1,MT1E,MT1F,MT1G,MT1H,MT1HL1,MT2A,TSPO
GO:BP	regulation of cell differentiation	GO:0045595	0.00108963	2.96272	1903	241	52	17847	ACVRL1,AKT1,ANXA1,ANXA2,APOE,ARHGDIA,C1QC,CDKN1B,CDKN1C,CFL1,CLIC1,COL1A1,COL3A1,COL5A1,COL5A2,CTSK,DAB2,EFEMP1,FBN1,FLNA,FN1,GJA1,GRN,HIF1A,HSPA9,MAFB,MAPT,METRNL,MIR21,MIR22,MYADM,PAFAH1B1,PLA2G2A,POSTN,PRELID1,PREX1,PSMA7,PSMC1,RNF10,S100A10,SDCBP,SFRP4,SH3PXD2B,SKI,SOCS3,TCIRG1,TGFB1I1,THY1,TNIK,TSPO,VEZF1,ZSWIM6
GO:BP	collagen fibril organization	GO:0030199	0.00124891	2.90347	54	241	8	17847	ANXA2,COL1A1,COL1A2,COL3A1,COL5A1,COL5A2,PLOD3,SERPINH1
GO:BP	exocytosis	GO:0006887	0.00130192	2.88542	906	241	32	17847	ANXA1,ANXA2,ANXA5,ARHGAP9,CD14,CLEC3B,CYB5R3,DYNLL1,FLNA,FN1,FTL,GHDC,GNAI2,GRN,PFN2,PLEKHO2,PPIA,RAB31,RAB8A,RHOG,S100A11,SDCBP,SERPING1,STEAP2,TAGLN2,TCIRG1,TIMP1,TMEM173,TMSB4X,TNFAIP2,TSPAN14,VAMP3
GO:BP	cell morphogenesis	GO:0000902	0.00142261	2.84691	1050	241	35	17847	ACTB,ANXA1,APOE,ARHGDIA,CDC42EP5,CFL1,CNP,COL6A1,COL6A2,COL6A3,FAT1,FLNA,FN1,GJA1,LAMB2,MAPT,MIR21,MSN,MYADM,PAFAH1B1,PLEKHO1,PLOD3,POSTN,PREX1,RAB8A,RHOG,S100A10,S100A6,SHC1,SIDT2,TGFB1I1,THY1,TNIK,VAMP3,ZSWIM6
GO:BP	positive regulation of supramolecular fiber organization	GO:1902905	0.00146269	2.83485	203	241	14	17847	APOE,ARPC1B,CDC42EP5,CDKN1B,CFL1,CLIP1,FLNA,GPX1,MAPT,PFN1,PFN2,S100A10,SH3PXD2B,WAS
GO:BP	cytoskeleton organization	GO:0007010	0.00170019	2.7695	1353	241	41	17847	ACTB,ANXA1,APOE,ARHGDIA,ARHGDIB,ARPC1B,CAPZA1,CDC42EP5,CDKN1B,CFL1,CLIP1,CNP,FAT1,FLNA,GJA1,LIMA1,MAPT,MIR21,MSN,MSRB1,MYADM,PAFAH1B1,PDGFRB,PFN1,PFN2,PREX1,RHOG,S100A10,SDCBP,SH3PXD2B,SHC1,THY1,TMOD1,TMSB10,TMSB4X,TNIK,TUBA1A,TUBA1B,TUBB2A,WAS,ZYX
GO:BP	actin polymerization or depolymerization	GO:0008154	0.00174491	2.75823	206	241	14	17847	ARPC1B,CAPZA1,CDC42EP5,CFL1,LIMA1,MSRB1,MYADM,PFN1,PFN2,PREX1,TMOD1,TMSB10,TMSB4X,WAS
GO:BP	cellular component morphogenesis	GO:0032989	0.00175065	2.7568	1156	241	37	17847	ACTB,ANXA1,APOE,ARHGDIA,CDC42EP5,CFL1,CNP,COL6A1,COL6A2,COL6A3,FAT1,FLNA,FN1,GJA1,LAMB2,MAPT,MIR21,MSN,MYADM,PAFAH1B1,PDGFRB,PLEKHO1,PLOD3,POSTN,PREX1,RAB8A,RHOG,S100A10,S100A6,SHC1,SIDT2,TGFB1I1,THY1,TMOD1,TNIK,VAMP3,ZSWIM6
GO:BP	response to oxygen-containing compound	GO:1901700	0.00179545	2.74583	1719	241	48	17847	ACTB,AKT1,ANXA1,ANXA5,APOE,ARPC1B,CCND3,CCR5,CD14,CDKN1B,CFL1,CNP,COL1A1,COL1A2,COL3A1,COL5A2,COL6A1,COL6A2,COLEC12,FBN1,FLNA,GJA1,GNAI2,GPX1,HIF1A,LGMN,LOXL1,MAPT,MIR21,MMP2,MSN,NFE2L1,NRIP1,PDE2A,PDGFRB,POSTN,RAB31,RAB8A,SESN1,SHC1,SIDT2,SOCS3,SREBF1,TBC1D4,TCIRG1,TIMP1,TSPO,UCP2
GO:BP	regulation of actin polymerization or depolymerization	GO:0008064	0.00205397	2.68741	179	241	13	17847	ARPC1B,CAPZA1,CDC42EP5,CFL1,LIMA1,MYADM,PFN1,PFN2,PREX1,TMOD1,TMSB10,TMSB4X,WAS
GO:BP	response to organonitrogen compound	GO:0010243	0.00206089	2.68595	1067	241	35	17847	ACTB,AKT1,ANXA1,ANXA5,APOE,BCAP31,CCND3,CDKN1B,CFL1,COL1A1,COL1A2,COL3A1,COL5A2,COL6A1,FBN1,FLNA,GJA1,GNAI2,GSTM2,LGMN,MMP2,OS9,PDE2A,RAB31,RAB8A,SESN1,SHC1,SOCS3,SREBF1,TBC1D4,TCIRG1,TIMP1,TSPO,UCP2,USP13
GO:BP	positive regulation of cellular component organization	GO:0051130	0.00218551	2.66045	1216	241	38	17847	ANXA1,ANXA2,AP2M1,APOE,ARHGDIA,ARPC1B,CD14,CDC42EP5,CDKN1B,CFL1,CLIP1,DAB2,FLNA,FN1,FYCO1,G3BP2,GPX1,GRN,HIF1A,MAPT,MIR21,MSN,MYADM,PAFAH1B1,PDGFRB,PFN1,PFN2,PIEZO1,PREX1,RAB31,S100A10,SDCBP,SFRP4,SH3PXD2B,SREBF1,THBS2,THY1,WAS
GO:BP	regulation of actin filament length	GO:0030832	0.00218766	2.66002	180	241	13	17847	ARPC1B,CAPZA1,CDC42EP5,CFL1,LIMA1,MYADM,PFN1,PFN2,PREX1,TMOD1,TMSB10,TMSB4X,WAS
GO:BP	regulated exocytosis	GO:0045055	0.00224191	2.64938	792	241	29	17847	ANXA2,ANXA5,ARHGAP9,CD14,CLEC3B,CYB5R3,DYNLL1,FLNA,FN1,FTL,GHDC,GNAI2,GRN,PFN2,PLEKHO2,PPIA,RAB31,RHOG,S100A11,SDCBP,SERPING1,STEAP2,TAGLN2,TCIRG1,TIMP1,TMEM173,TMSB4X,TSPAN14,VAMP3
GO:BP	cellular response to transforming growth factor beta stimulus	GO:0071560	0.00238508	2.6225	243	241	15	17847	ACVRL1,CDKN1C,CLEC3B,COL1A1,COL1A2,COL3A1,DAB2,FBN1,MIR21,PDE2A,POSTN,SDCBP,SKI,TGFB1I1,ZYX
GO:BP	leukocyte migration	GO:0050900	0.00245153	2.61056	498	241	22	17847	AKT1,ANXA1,ATP1B3,CCR5,CD99,COL1A1,COL1A2,CXCL16,FN1,HSD3B7,IGKV1-17,LGMN,MSN,MTUS1,PPIA,PREX1,RHOG,SDC3,SHC1,SLC7A7,THBS4,THY1
GO:BP	cellular response to organonitrogen compound	GO:0071417	0.00246996	2.60731	664	241	26	17847	ACTB,AKT1,ANXA5,CCND3,COL1A1,COL1A2,COL3A1,COL5A2,COL6A1,FBN1,FLNA,GJA1,GNAI2,GSTM2,LGMN,MMP2,PDE2A,RAB31,RAB8A,SESN1,SHC1,SOCS3,SREBF1,TBC1D4,TCIRG1,UCP2
GO:BP	regulation of multicellular organismal development	GO:2000026	0.00260418	2.58433	2180	241	56	17847	ACVRL1,AKT1,ANXA1,ANXA2,AP2M1,APOE,ARHGDIA,ARHGDIB,C1QC,CDKN1B,CDKN1C,CFL1,COL1A1,COL3A1,COL5A1,COL5A2,CTSK,DAB2,DUSP6,EFEMP1,FBN1,FLNA,FN1,GJA1,GPX1,GRN,HIF1A,HSPA9,MAFB,MAPT,MIR21,MIR22,MYADM,PAFAH1B1,PDGFRB,PFN1,PRELID1,PREX1,PSMA7,PSMC1,RNF10,SDCBP,SFRP4,SH3PXD2B,SKI,STAB1,TGFB1I1,THBS2,THBS4,THY1,TIMP1,TNIK,TSPO,TYMP,VEZF1,ZSWIM6
GO:BP	cell morphogenesis involved in differentiation	GO:0000904	0.00294238	2.5313	758	241	28	17847	ACTB,APOE,ARHGDIA,CFL1,CNP,COL6A1,COL6A2,COL6A3,FAT1,FLNA,FN1,LAMB2,MAPT,MYADM,PAFAH1B1,PLOD3,POSTN,PREX1,RAB8A,RHOG,S100A10,S100A6,SHC1,TGFB1I1,THY1,TNIK,VAMP3,ZSWIM6
GO:BP	ameboidal-type cell migration	GO:0001667	0.00305712	2.51469	465	241	21	17847	ACVRL1,AKT1,ANXA1,APOE,ARHGDIB,CFL1,FN1,GJA1,GPX1,GRN,HIF1A,LGMN,LOC102724985,MIR21,MIR22,PAFAH1B1,PFN1,PFN2,TGFB1I1,TIMP1,TMSB4X
GO:BP	transport	GO:0006810	0.00319499	2.49553	5296	241	106	17847	ACTB,ADIPOR2,AKT1,ANXA1,ANXA2,ANXA5,AP2M1,APOE,ARF3,ARHGAP9,ARPC1B,ATP1B3,BAG3,BCAP31,C4A,CAPZA1,CCR5,CD14,CDKN1B,CLEC3B,CLIC1,CLIP1,CLTCL1,CNP,COL1A1,COLEC12,COX10,COX6A1,CXCL16,CYB5R3,DAB2,DYNLL1,FCGRT,FLNA,FN1,FTL,FXYD5,FYCO1,G3BP2,GHDC,GJA1,GNAI2,GRN,GSTM2,HIF1A,HLA-E,HSPA9,IGHG1,IGKV1-17,KPNA1,LASP1,LIMA1,MAPT,MIR21,MRC2,MSN,NFE2L1,OS9,PAFAH1B1,PDE2A,PDGFRB,PFN2,PIEZO1,PLA2G2A,PLEKHO2,PLP2,P…
GO:BP	response to copper ion	GO:0046688	0.0033296	2.47761	43	241	7	17847	MT1E,MT1F,MT1G,MT1H,MT1HL1,MT2A,NFE2L1
GO:BP	vesicle-mediated transport	GO:0016192	0.00358436	2.44559	2146	241	55	17847	ACTB,ANXA1,ANXA2,ANXA5,AP2M1,APOE,ARF3,ARHGAP9,ARPC1B,BCAP31,C4A,CAPZA1,CD14,CLEC3B,CLTCL1,COLEC12,CXCL16,CYB5R3,DAB2,DYNLL1,FCGRT,FLNA,FN1,FTL,GHDC,GNAI2,GRN,IGHG1,IGKV1-17,MRC2,MSN,PFN2,PLEKHO2,PPIA,RAB31,RAB8A,RHOG,S100A10,S100A11,SDCBP,SERPING1,SFRP4,SIGLEC1,STAB1,STEAP2,TAGLN2,TBC1D4,TCIRG1,TIMP1,TMEM173,TMSB4X,TNFAIP2,TSPAN14,VAMP3,WAS
GO:BP	regulation of protein polymerization	GO:0032271	0.00361748	2.44159	219	241	14	17847	ARPC1B,CAPZA1,CDC42EP5,CDKN1B,CLIP1,MAPT,MYADM,PFN1,PFN2,PREX1,TMOD1,TMSB10,TMSB4X,WAS
GO:BP	response to cadmium ion	GO:0046686	0.00369826	2.432	62	241	8	17847	AKT1,CDKN1B,MT1E,MT1F,MT1G,MT1H,MT1HL1,MT2A
GO:BP	regulation of response to stress	GO:0080134	0.00392422	2.40625	1554	241	44	17847	AKNA,AKT1,ANXA1,ANXA2,ANXA5,APOE,BAG3,BCAP31,CD14,CDKN1B,COLEC12,CTSK,FXR1,GJA1,GPX1,GRN,HIF1A,HLA-E,ICAM2,LGMN,MAPT,METRNL,MIR21,MIR22,NFE2L1,OS9,PAFAH1B1,PDE2A,PIK3AP1,PLA2G2A,PSMA7,PSMC1,SDCBP,SERPING1,SESN1,SOCS3,THY1,TMEM173,TMSB4X,TNIK,USP13,VSIG4,WAS,ZYX
GO:BP	cellular response to metal ion	GO:0071248	0.00451478	2.34536	192	241	13	17847	AKT1,ANXA5,CDKN1B,CPNE2,LGMN,MT1E,MT1F,MT1G,MT1H,MT1HL1,MT2A,NFE2L1,TSPO
GO:BP	regulation of immune system process	GO:0002682	0.0047149	2.32653	1671	241	46	17847	ACTB,AKT1,ANXA1,APOE,ARPC1B,C1QA,C1QC,C4A,CD14,CD99,CMTM3,COL1A1,COL1A2,COL3A1,COLEC12,CTSK,FBN1,FCGRT,GPX1,GRN,HCST,HIF1A,HLA-E,HSPA9,ICAM2,IGHG1,IGKV1-17,LGMN,MAFB,MIR21,MSN,MTUS1,PIK3AP1,PLA2G2A,PRELID1,PSMA7,PSMC1,RHOG,SERPING1,SHC1,SOCS3,THBS4,THY1,TMEM173,VSIG4,WAS
GO:BP	negative regulation of organelle organization	GO:0010639	0.00490421	2.30943	401	241	19	17847	AKT1,BAG3,CAPZA1,GPX1,LIMA1,MAPT,MIR21,MYADM,PFN1,PFN2,PRELID1,PTTG1,SKI,TBC1D4,TMOD1,TMSB10,TMSB4X,TSPO,WAS
GO:BP	response to growth factor	GO:0070848	0.00523971	2.28069	736	241	27	17847	ACVRL1,AKT1,ANXA1,CDKN1C,CLEC3B,COL1A1,COL1A2,COL3A1,DAB2,DUSP6,FBN1,FSTL1,HIF1A,LGMN,MAPT,MIR21,MT1G,MXRA5,PDE2A,PDGFRB,POSTN,SDCBP,SFRP4,SHC1,SKI,TGFB1I1,ZYX
GO:BP	regulation of immune response	GO:0050776	0.00536688	2.27028	1113	241	35	17847	ACTB,ANXA1,APOE,ARPC1B,C1QA,C1QC,C4A,CD14,CD99,CMTM3,COL1A1,COL1A2,COL3A1,COLEC12,CTSK,FCGRT,GPX1,GRN,HCST,HLA-E,ICAM2,IGHG1,IGKV1-17,LGMN,MIR21,PIK3AP1,PSMA7,PSMC1,SERPING1,SHC1,SOCS3,THY1,TMEM173,VSIG4,WAS
GO:BP	cellular response to oxygen-containing compound	GO:1901701	0.00600116	2.22176	1218	241	37	17847	ACTB,AKT1,ANXA1,ANXA5,CCND3,CCR5,CD14,COL1A1,COL1A2,COL3A1,COL5A2,COL6A1,COLEC12,FBN1,FLNA,GJA1,GNAI2,HIF1A,LGMN,MAPT,MIR21,MMP2,MSN,NFE2L1,NRIP1,PDE2A,RAB31,RAB8A,SESN1,SHC1,SIDT2,SOCS3,SREBF1,TBC1D4,TCIRG1,TSPO,UCP2
GO:BP	signaling	GO:0023052	0.00648906	2.18782	6681	241	125	17847	ACKR1,ACTB,ACVRL1,ADIPOR2,AKAP1,AKT1,ANXA1,ANXA2,ANXA5,AP2M1,APOE,ARHGAP9,ARHGDIA,ARHGDIB,ARPC1B,ATP1B3,BAG3,BCAP31,C1QA,CAPZA1,CCND3,CCR5,CD14,CDC42EP5,CDKN1B,CDKN1C,CFL1,CHSY1,CLIC1,CMTM3,CNP,COL1A1,COL1A2,COL3A1,COLEC12,CRIP1,CTSK,CXCL16,DAB2,DUSP6,EFEMP1,FAT1,FBN1,FLNA,FN1,FSTL1,G3BP2,GJA1,GLIS2,GNAI2,GPX1,GRN,GSTM2,HCST,HIF1A,HLA-E,HSPA9,ICAM2,IGFBP4,IGHG1,IGKV1-17,KPNA1,LASP1,LGMN,LY6E,MAPT…
GO:BP	cell surface receptor signaling pathway	GO:0007166	0.00660078	2.1804	3128	241	71	17847	ACKR1,ACTB,ACVRL1,ADIPOR2,AKT1,ANXA1,ANXA2,AP2M1,APOE,ARHGDIA,ARPC1B,BAG3,CAPZA1,CCND3,CCR5,CD14,CDKN1B,CDKN1C,CFL1,CHSY1,CMTM3,COL1A1,COL1A2,COL3A1,DAB2,EFEMP1,FBN1,FLNA,FN1,FSTL1,GLIS2,GNAI2,GPX1,HIF1A,HLA-E,HSPA9,ICAM2,IGFBP4,IGHG1,IGKV1-17,LGMN,LY6E,MIR21,MKNK2,MMP2,MSN,MT2A,PAFAH1B1,PDGFRB,PFN1,PLP2,POSTN,PPIA,PPP1CA,PSMA7,PSMC1,SDCBP,SFRP4,SHC1,SKI,SOCS3,SREBF1,TCIRG1,TGFB1I1,THY1,TIMP1,TMS…
GO:BP	negative regulation of multicellular organismal process	GO:0051241	0.00783888	2.10575	1334	241	39	17847	ACVRL1,ANXA1,ANXA2,ANXA5,APOE,ARHGDIA,ARHGDIB,C1QC,CDKN1B,CHSY1,COL3A1,COL5A1,COL5A2,CTSK,EFEMP1,FBN1,FN1,GJA1,GNAI2,GRN,HIF1A,HSPA9,LGMN,MAFB,MIR21,MIR22,PAFAH1B1,PFN2,RNF10,SERPING1,SKI,STAB1,THBS2,THBS4,THY1,TIMP1,TMSB4X,TSPO,VSIG4
GO:BP	bone morphogenesis	GO:0060349	0.00813043	2.08989	116	241	10	17847	ANXA2,CHSY1,COL1A1,COL6A1,COL6A2,COL6A3,FOXN3,SERPINH1,SFRP4,SKI
GO:BP	anatomical structure formation involved in morphogenesis	GO:0048646	0.00863554	2.06371	1187	241	36	17847	ACVRL1,ADIPOR2,AKT1,ANXA1,ANXA2,CFL1,COL1A1,COL5A1,COL5A2,COL6A1,FN1,GJA1,GPX1,GRN,HIF1A,MAFB,MIR21,MIR22,MMP2,PAFAH1B1,PDGFRB,PFN1,PLEKHO1,SAT1,SHC1,SKI,STAB1,TCIRG1,TGFBI,THBS2,THBS4,THY1,TMOD1,TNFAIP2,TYMP,VEZF1
GO:BP	protein localization to plasma membrane	GO:0072659	0.00918102	2.03711	271	241	15	17847	ACTB,AKT1,ANXA2,AP2M1,ATP1B3,DAB2,FLNA,MYADM,RAB31,RAB8A,RHOG,S100A10,TNIK,TSPAN14,VAMP3
GO:BP	negative regulation of supramolecular fiber organization	GO:1902904	0.00931782	2.03069	145	241	11	17847	APOE,CAPZA1,LIMA1,MIR21,MYADM,PFN1,PFN2,TMOD1,TMSB10,TMSB4X,WAS
GO:BP	maintenance of location	GO:0051235	0.00970412	2.01304	344	241	17	17847	AKT1,ANXA5,APOE,CCR5,FBN1,FLNA,FTL,G3BP2,GSTM2,MEST,NRIP1,OS9,PAFAH1B1,THY1,TMSB10,TMSB4X,TSPO
GO:BP	epithelial cell development	GO:0002064	0.00982126	2.00783	206	241	13	17847	FAT1,FLNA,GPX1,HIF1A,LAMB2,MSN,MYADM,PAFAH1B1,PDE2A,PLOD3,SIDT2,TMOD1,VEZF1
GO:BP	establishment of localization	GO:0051234	0.0101616	1.99304	5419	241	106	17847	ACTB,ADIPOR2,AKT1,ANXA1,ANXA2,ANXA5,AP2M1,APOE,ARF3,ARHGAP9,ARPC1B,ATP1B3,BAG3,BCAP31,C4A,CAPZA1,CCR5,CD14,CDKN1B,CLEC3B,CLIC1,CLIP1,CLTCL1,CNP,COL1A1,COLEC12,COX10,COX6A1,CXCL16,CYB5R3,DAB2,DYNLL1,FCGRT,FLNA,FN1,FTL,FXYD5,FYCO1,G3BP2,GHDC,GJA1,GNAI2,GRN,GSTM2,HIF1A,HLA-E,HSPA9,IGHG1,IGKV1-17,KPNA1,LASP1,LIMA1,MAPT,MIR21,MRC2,MSN,NFE2L1,OS9,PAFAH1B1,PDE2A,PDGFRB,PFN2,PIEZO1,PLA2G2A,PLEKHO2,PLP2,P…
GO:BP	positive regulation of transport	GO:0051050	0.0101647	1.99291	998	241	32	17847	ACTB,ADIPOR2,AKT1,ANXA1,ANXA2,AP2M1,APOE,ATP1B3,BAG3,BCAP31,C4A,CD14,CLTCL1,DAB2,FLNA,GJA1,GNAI2,GSTM2,HIF1A,HLA-E,MIR21,MSN,PDGFRB,POSTN,PPIA,PRELID1,RAB31,SDCBP,SFRP4,THY1,TMSB4X,TSPO
GO:BP	positive regulation of cell migration	GO:0030335	0.010901	1.96253	546	241	22	17847	AKT1,ANXA1,CD99,COL1A1,CXCL16,DAB2,FLNA,FN1,GNAI2,GRN,HIF1A,LGMN,MIR21,MYADM,PDGFRB,PFN1,POSTN,PREX1,SDCBP,THBS4,THY1,TMSB4X
GO:BP	protein polymerization	GO:0051258	0.0114611	1.94078	276	241	15	17847	ARPC1B,CAPZA1,CDC42EP5,CDKN1B,CLIP1,MAPT,MSRB1,MYADM,PFN1,PFN2,PREX1,TMOD1,TMSB10,TMSB4X,WAS
GO:BP	response to hormone	GO:0009725	0.0122289	1.91261	1007	241	32	17847	ADIPOR2,AKT1,ANXA1,ANXA2,ANXA5,ARPC1B,CCND3,CDKN1B,COL1A1,DAB2,FBN1,GJA1,GNAI2,MSN,NRIP1,PDGFRB,PLOD3,POSTN,RAB31,RAB8A,SFRP4,SHC1,SOCS3,SREBF1,STEAP2,TBC1D4,TCIRG1,TGFB1I1,TIMP1,TSPO,UCP2,UFSP2
GO:BP	negative regulation of developmental process	GO:0051093	0.0122476	1.91195	1056	241	33	17847	ACVRL1,ANXA1,ANXA2,APOE,ARHGDIA,ARHGDIB,C1QC,CDKN1B,COL3A1,COL5A1,COL5A2,CTSK,EFEMP1,FBN1,GJA1,HIF1A,HSPA9,LGMN,MAFB,MAPT,MIR21,MIR22,PAFAH1B1,POSTN,RNF10,SKI,STAB1,TGFB1I1,THBS2,THBS4,THY1,TIMP1,TSPO
GO:BP	actin filament polymerization	GO:0030041	0.0123684	1.90768	179	241	12	17847	ARPC1B,CAPZA1,CDC42EP5,MSRB1,MYADM,PFN1,PFN2,PREX1,TMOD1,TMSB10,TMSB4X,WAS
GO:BP	cell-substrate adhesion	GO:0031589	0.0126724	1.89714	351	241	17	17847	ACVRL1,CCDC80,COL1A1,COL3A1,FBLN2,FLNA,FN1,LAMB2,MYADM,POSTN,PREX1,S100A10,SIGLEC1,TGFB1I1,THY1,VAMP3,ZYX
GO:BP	angiogenesis	GO:0001525	0.0130597	1.88407	595	241	23	17847	ACVRL1,ADIPOR2,AKT1,ANXA1,ANXA2,FN1,GPX1,GRN,HIF1A,MIR21,MIR22,MMP2,PDGFRB,SAT1,SHC1,STAB1,TGFBI,THBS2,THBS4,THY1,TNFAIP2,TYMP,VEZF1
GO:BP	cellular zinc ion homeostasis	GO:0006882	0.0138786	1.85766	35	241	6	17847	MT1E,MT1F,MT1G,MT1H,MT1HL1,MT2A
GO:BP	substrate adhesion-dependent cell spreading	GO:0034446	0.0148384	1.82861	98	241	9	17847	FLNA,FN1,LAMB2,MYADM,POSTN,PREX1,S100A10,TGFB1I1,VAMP3
GO:BP	negative regulation of cellular component organization	GO:0051129	0.0148541	1.82815	733	241	26	17847	ACVRL1,AKT1,APOE,ARHGDIA,BAG3,CAPZA1,GPX1,LIMA1,MAPT,MIR21,MYADM,PAFAH1B1,PFN1,PFN2,POSTN,PRELID1,PTTG1,SDCBP,SKI,TBC1D4,THY1,TMOD1,TMSB10,TMSB4X,TSPO,WAS
GO:BP	blood vessel morphogenesis	GO:0048514	0.0152793	1.8159	689	241	25	17847	ACVRL1,ADIPOR2,AKT1,ANXA1,ANXA2,APOE,COL3A1,FN1,GPX1,GRN,HIF1A,MIR21,MIR22,MMP2,PDGFRB,SAT1,SHC1,STAB1,TGFBI,THBS2,THBS4,THY1,TNFAIP2,TYMP,VEZF1
GO:BP	regulation of anatomical structure morphogenesis	GO:0022603	0.0161183	1.79268	1170	241	35	17847	ACVRL1,ANXA1,AP2M1,APOE,ARHGDIA,CDC42EP5,CFL1,COL5A1,COL5A2,DAB2,FLNA,FN1,GJA1,GRN,HIF1A,MAPT,MIR21,MIR22,MSN,MYADM,PAFAH1B1,PFN1,PLEKHO1,POSTN,PREX1,PSMA7,PSMC1,RHOG,S100A10,STAB1,THBS2,THBS4,THY1,TNIK,ZSWIM6
GO:BP	response to other organism	GO:0051707	0.0167178	1.77682	1536	241	42	17847	AKT1,ANXA1,APOE,C1QA,C1QC,C4A,CAPZA1,CCDC80,CCR5,CD14,CFL1,CNP,COLEC12,CTSK,CXCL16,FLNA,G3BP2,GJA1,GPX1,GRN,HLA-E,ICAM2,IGHG1,LGMN,LOXL1,MIR21,MSRB1,MT2A,PIK3AP1,PLA2G2A,PSMA7,PSMC1,SERPING1,SHC1,SOCS3,STAB1,TMEM173,TSPO,VAMP3,VSIG4,WAS,ZYX
GO:BP	regulation of response to external stimulus	GO:0032101	0.0168186	1.77421	1122	241	34	17847	AKNA,ANXA1,ANXA2,ANXA5,APOE,CD14,CDKN1B,COLEC12,CTSK,GJA1,GPX1,GRN,HLA-E,ICAM2,LGMN,METRNL,MIR21,MIR22,MTUS1,NFE2L1,PDE2A,PDGFRB,PIK3AP1,PLA2G2A,PSMA7,PSMC1,SERPING1,SOCS3,THBS4,TMEM173,TMSB4X,VSIG4,ZSWIM6,ZYX
GO:BP	response to external biotic stimulus	GO:0043207	0.0172593	1.76298	1538	241	42	17847	AKT1,ANXA1,APOE,C1QA,C1QC,C4A,CAPZA1,CCDC80,CCR5,CD14,CFL1,CNP,COLEC12,CTSK,CXCL16,FLNA,G3BP2,GJA1,GPX1,GRN,HLA-E,ICAM2,IGHG1,LGMN,LOXL1,MIR21,MSRB1,MT2A,PIK3AP1,PLA2G2A,PSMA7,PSMC1,SERPING1,SHC1,SOCS3,STAB1,TMEM173,TSPO,VAMP3,VSIG4,WAS,ZYX
GO:BP	export from cell	GO:0140352	0.0181998	1.73993	1595	241	43	17847	ANXA1,ANXA2,ANXA5,APOE,ARHGAP9,ATP1B3,CD14,CLEC3B,CYB5R3,DYNLL1,FLNA,FN1,FTL,GHDC,GJA1,GNAI2,GRN,HIF1A,HLA-E,MIR21,PAFAH1B1,PFN2,PLEKHO2,POSTN,PPIA,RAB31,RAB8A,RHOG,S100A11,SDCBP,SERPING1,SIDT2,SREBF1,STEAP2,TAGLN2,TCIRG1,TIMP1,TMEM173,TMSB4X,TNFAIP2,TSPAN14,UCP2,VAMP3
GO:BP	cellular response to inorganic substance	GO:0071241	0.0190845	1.71932	219	241	13	17847	AKT1,ANXA5,CDKN1B,CPNE2,LGMN,MT1E,MT1F,MT1G,MT1H,MT1HL1,MT2A,NFE2L1,TSPO
GO:BP	zinc ion homeostasis	GO:0055069	0.0194339	1.71144	37	241	6	17847	MT1E,MT1F,MT1G,MT1H,MT1HL1,MT2A
GO:BP	endothelium development	GO:0003158	0.0196331	1.70701	128	241	10	17847	ACVRL1,ANXA2,GJA1,GPX1,MIR21,MSN,MYADM,PDE2A,PLOD3,VEZF1
GO:BP	positive regulation of cell motility	GO:2000147	0.0203165	1.69215	568	241	22	17847	AKT1,ANXA1,CD99,COL1A1,CXCL16,DAB2,FLNA,FN1,GNAI2,GRN,HIF1A,LGMN,MIR21,MYADM,PDGFRB,PFN1,POSTN,PREX1,SDCBP,THBS4,THY1,TMSB4X
GO:BP	cytokine-mediated signaling pathway	GO:0019221	0.0225455	1.64694	797	241	27	17847	ACKR1,ADIPOR2,AKT1,ANXA1,ANXA2,CAPZA1,CCR5,CFL1,COL1A2,FN1,HIF1A,HLA-E,HSPA9,IGHG1,MIR21,MMP2,MSN,MT2A,PAFAH1B1,PLP2,PPIA,PSMA7,PSMC1,SHC1,SOCS3,TIMP1,TMSB4X
GO:BP	visual system development	GO:0150063	0.022721	1.64357	367	241	17	17847	ACVRL1,C1QA,CDKN1B,CDKN1C,COL5A1,COL5A2,EFEMP1,FAT1,FBN1,HIF1A,LAMB2,PDGFRB,SH3PXD2B,SKI,TCIRG1,THY1,TMOD1
GO:BP	protein localization to cell periphery	GO:1990778	0.0235871	1.62732	330	241	16	17847	ACTB,AKT1,ANXA2,AP2M1,ATP1B3,CLIP1,DAB2,FLNA,MYADM,RAB31,RAB8A,RHOG,S100A10,TNIK,TSPAN14,VAMP3
GO:BP	cellular response to growth factor stimulus	GO:0071363	0.0237457	1.62442	707	241	25	17847	ACVRL1,AKT1,ANXA1,CDKN1C,CLEC3B,COL1A1,COL1A2,COL3A1,DAB2,FBN1,FSTL1,HIF1A,LGMN,MAPT,MIR21,MT1G,PDE2A,PDGFRB,POSTN,SDCBP,SFRP4,SHC1,SKI,TGFB1I1,ZYX
GO:BP	response to biotic stimulus	GO:0009607	0.0247683	1.6061	1561	241	42	17847	AKT1,ANXA1,APOE,C1QA,C1QC,C4A,CAPZA1,CCDC80,CCR5,CD14,CFL1,CNP,COLEC12,CTSK,CXCL16,FLNA,G3BP2,GJA1,GPX1,GRN,HLA-E,ICAM2,IGHG1,LGMN,LOXL1,MIR21,MSRB1,MT2A,PIK3AP1,PLA2G2A,PSMA7,PSMC1,SERPING1,SHC1,SOCS3,STAB1,TMEM173,TSPO,VAMP3,VSIG4,WAS,ZYX
GO:BP	regulation of defense response	GO:0031347	0.0257838	1.58865	803	241	27	17847	AKNA,ANXA1,APOE,CD14,COLEC12,CTSK,GJA1,GPX1,GRN,HLA-E,ICAM2,LGMN,METRNL,MIR21,MIR22,NFE2L1,PDE2A,PIK3AP1,PLA2G2A,PSMA7,PSMC1,SERPING1,SOCS3,TMEM173,TMSB4X,VSIG4,ZYX
GO:BP	cell communication	GO:0007154	0.0263948	1.57848	6706	241	123	17847	ACKR1,ACTB,ACVRL1,ADIPOR2,AKAP1,AKT1,ANXA1,ANXA2,ANXA5,AP2M1,APOE,ARHGAP9,ARHGDIA,ARHGDIB,ARPC1B,BAG3,BCAP31,C1QA,CAPZA1,CCND3,CCR5,CD14,CDC42EP5,CDKN1B,CDKN1C,CFL1,CHSY1,CLIC1,CMTM3,CNP,COL1A1,COL1A2,COL3A1,COLEC12,CRIP1,CTSK,CXCL16,DAB2,DUSP6,EFEMP1,FAT1,FBN1,FLNA,FN1,FSTL1,G3BP2,GJA1,GLIS2,GNAI2,GPX1,GRN,GSTM2,HCST,HIF1A,HLA-E,HSPA9,ICAM2,IGFBP4,IGHG1,IGKV1-17,KPNA1,LASP1,LGMN,LY6E,MAPT,METRNL…
GO:BP	negative regulation of biological process	GO:0048519	0.0267568	1.57257	5596	241	107	17847	ACVRL1,ADIPOR2,AKNA,AKT1,ANXA1,ANXA2,ANXA5,AP2M1,APOE,ARHGDIA,ARHGDIB,BACE2,BAG3,C1QC,C4A,CAPZA1,CCND3,CCR5,CD14,CDKN1B,CDKN1C,CFL1,CHSY1,COL1A1,COL3A1,COL5A1,COL5A2,COL6A3,CTSK,DAB2,DUSP6,DYNLL1,EFEMP1,FBN1,FLNA,FN1,FOXN3,FXR1,FXYD5,G3BP2,GJA1,GLIS2,GNAI2,GPX1,GRN,GSTM2,HIF1A,HLA-E,HOXC6,HSPA9,IGFBP4,LGMN,LIMA1,MAFB,MAPT,METRNL,MIR21,MIR22,MT1E,MT1F,MT1G,MT1H,MT2A,MYADM,NRIP1,OS9,PAFAH1B1,PDE2A,…
GO:BP	regulation of actin filament polymerization	GO:0030833	0.0269034	1.57019	162	241	11	17847	ARPC1B,CAPZA1,CDC42EP5,MYADM,PFN1,PFN2,PREX1,TMOD1,TMSB10,TMSB4X,WAS
GO:BP	regulation of cell morphogenesis	GO:0022604	0.0269109	1.57007	493	241	20	17847	ANXA1,APOE,ARHGDIA,CDC42EP5,CFL1,FLNA,FN1,MAPT,MIR21,MSN,MYADM,PAFAH1B1,PLEKHO1,POSTN,PREX1,RHOG,S100A10,THY1,TNIK,ZSWIM6
GO:BP	sensory system development	GO:0048880	0.0270767	1.5674	372	241	17	17847	ACVRL1,C1QA,CDKN1B,CDKN1C,COL5A1,COL5A2,EFEMP1,FAT1,FBN1,HIF1A,LAMB2,PDGFRB,SH3PXD2B,SKI,TCIRG1,THY1,TMOD1
GO:BP	inflammatory response to wounding	GO:0090594	0.0307177	1.51261	12	241	4	17847	GRN,HIF1A,MIR21,TIMP1
GO:BP	negative regulation of actin filament polymerization	GO:0030837	0.0328359	1.48365	60	241	7	17847	CAPZA1,MYADM,PFN1,PFN2,TMOD1,TMSB10,TMSB4X
GO:BP	positive regulation of cellular component movement	GO:0051272	0.0329547	1.48208	586	241	22	17847	AKT1,ANXA1,CD99,COL1A1,CXCL16,DAB2,FLNA,FN1,GNAI2,GRN,HIF1A,LGMN,MIR21,MYADM,PDGFRB,PFN1,POSTN,PREX1,SDCBP,THBS4,THY1,TMSB4X
GO:BP	biological regulation	GO:0065007	0.034484	1.46238	12469	241	197	17847	ACKR1,ACTB,ACVRL1,ADAP2,ADIPOR2,AKAP1,AKNA,AKT1,ANXA1,ANXA2,ANXA5,AP2M1,APOE,ARHGAP9,ARHGDIA,ARHGDIB,ARPC1B,ATP1B3,BACE2,BAG3,BCAP31,BRD2,C1QA,C1QC,C4A,CAPZA1,CCDC80,CCND3,CCR5,CD14,CD248,CD99,CDC25B,CDC42EP5,CDKN1B,CDKN1C,CFL1,CHSY1,CLEC3B,CLIC1,CLIP1,CLTCL1,CMTM3,CNP,COL1A1,COL1A2,COL3A1,COL5A1,COL5A2,COL6A3,COLEC12,COX6A1,CRIP1,CRIP2,CTSK,CXCL16,DAB2,DUSP6,DYNLL1,EFEMP1,EIF4H,EIF5,FBLN2,FBN1,F…
GO:BP	endothelial cell differentiation	GO:0045446	0.0380551	1.41959	110	241	9	17847	ACVRL1,ANXA2,GPX1,MIR21,MSN,MYADM,PDE2A,PLOD3,VEZF1
GO:BP	positive regulation of locomotion	GO:0040017	0.0427106	1.36946	596	241	22	17847	AKT1,ANXA1,CD99,COL1A1,CXCL16,DAB2,FLNA,FN1,GNAI2,GRN,HIF1A,LGMN,MIR21,MYADM,PDGFRB,PFN1,POSTN,PREX1,SDCBP,THBS4,THY1,TMSB4X
GO:BP	regulation of growth	GO:0040008	0.0458031	1.3391	689	241	24	17847	ACVRL1,ADIPOR2,AKT1,APOE,CDKN1B,CXCL16,DUSP6,FN1,GJA1,HIF1A,IGFBP4,LGMN,MAPT,MT1E,MT1F,MT1G,MT1H,MT2A,PAFAH1B1,PPIB,SDCBP,SH3PXD2B,SHC1,SOCS3
GO:BP	secretion by cell	GO:0032940	0.0470313	1.32761	1549	241	41	17847	ANXA1,ANXA2,ANXA5,APOE,ARHGAP9,CD14,CLEC3B,CYB5R3,DYNLL1,FLNA,FN1,FTL,GHDC,GJA1,GNAI2,GRN,HIF1A,HLA-E,PAFAH1B1,PFN2,PLEKHO2,POSTN,PPIA,RAB31,RAB8A,RHOG,S100A11,SDCBP,SERPING1,SIDT2,SREBF1,STEAP2,TAGLN2,TCIRG1,TIMP1,TMEM173,TMSB4X,TNFAIP2,TSPAN14,UCP2,VAMP3
GO:BP	regulation of proteolysis	GO:0030162	0.0477131	1.32136	737	241	25	17847	AKT1,ANXA2,APOE,BCAP31,C4A,CLEC3B,COL6A3,DAB2,FN1,GPX1,GRN,LGMN,MAPT,MIR21,NFE2L1,OS9,PCOLCE,PRELID1,PSMC1,PTTG1,SDCBP,SERPING1,SERPINH1,TIMP1,USP13
GO:CC	collagen-containing extracellular matrix	GO:0062023	5.3329e-23	22.273	405	250	42	18842	ADAMTS15,ANXA1,ANXA2,ANXA5,APOE,BGN,C1QA,C1QC,CCDC80,CLEC3B,COL1A1,COL1A2,COL3A1,COL5A1,COL5A2,COL6A1,COL6A2,COL6A3,EFEMP1,FBLN2,FBN1,FN1,LAMB2,LOXL1,MMP2,MXRA5,MXRA7,PCOLCE,PLOD3,POSTN,S100A10,S100A4,S100A6,SDC3,SERPING1,SERPINH1,TGFB1I1,TGFBI,THBS2,THBS4,TIMP1,VCAN
GO:CC	extracellular matrix	GO:0031012	4.37041e-22	21.3595	530	250	46	18842	ADAMTS15,ANXA1,ANXA2,ANXA5,APOE,BGN,C1QA,C1QC,CCDC80,CD248,CLEC3B,COL1A1,COL1A2,COL3A1,COL5A1,COL5A2,COL6A1,COL6A2,COL6A3,COLEC12,EFEMP1,FBLN2,FBN1,FN1,LAMB2,LOXL1,MMP2,MXRA5,MXRA7,OLFML2A,OLFML2B,PCOLCE,PLOD3,POSTN,S100A10,S100A4,S100A6,SDC3,SERPING1,SERPINH1,TGFB1I1,TGFBI,THBS2,THBS4,TIMP1,VCAN
GO:CC	vesicle	GO:0031982	7.38741e-20	19.1315	3891	250	120	18842	ACKR1,ACTB,AKT1,ANXA1,ANXA2,ANXA5,AP2M1,APOE,ARF3,ARHGAP9,ARHGDIA,ARHGDIB,ARPC1B,ATP1B3,BACE2,BCAP31,BGN,BLOC1S5-TXNDC5,C4A,CAPZA1,CCR5,CD14,CD248,CDKN1B,CFL1,CLEC3B,CLIC1,CLIP1,CLTCL1,CNDP2,CNP,COL1A1,COL1A2,COL6A1,COL6A2,COL6A3,COLEC12,CPNE2,CTSK,CYB5R3,DAB2,DYNLL1,EFEMP1,FAT1,FBLN2,FCGRT,FLNA,FN1,FSTL1,FTL,FYCO1,GHDC,GJA1,GNAI2,GRN,GSTM2,HLA-E,HSPA9,IGHG1,IGKV1-17,LAMB2,LGMN,LOXL1,MARCKSL1,MES…
GO:CC	extracellular vesicle	GO:1903561	3.5127e-18	17.4544	2166	250	84	18842	ACTB,ANXA1,ANXA2,ANXA5,AP2M1,APOE,ARF3,ARHGDIA,ARHGDIB,ARPC1B,ATP1B3,BGN,C4A,CAPZA1,CD14,CD248,CFL1,CLEC3B,CLIC1,CLTCL1,CNDP2,CNP,COL1A2,COL6A1,COL6A2,COL6A3,CPNE2,EFEMP1,FAT1,FBLN2,FLNA,FN1,FSTL1,FTL,GNAI2,GRN,GSTM2,HLA-E,HSPA9,IGHG1,IGKV1-17,LAMB2,LGMN,MARCKSL1,MEST,METRNL,MIR21,MIR22,MSN,MXRA5,MYL6,NAGK,OLFML3,PAFAH1B1,PCOLCE,PFN1,PFN2,PLA2G2A,PLD3,PLOD3,PPIA,PPIB,PPP1CA,PSMA7,RAB8A,RHOG,S100A…
GO:CC	extracellular organelle	GO:0043230	4.07437e-18	17.3899	2171	250	84	18842	ACTB,ANXA1,ANXA2,ANXA5,AP2M1,APOE,ARF3,ARHGDIA,ARHGDIB,ARPC1B,ATP1B3,BGN,C4A,CAPZA1,CD14,CD248,CFL1,CLEC3B,CLIC1,CLTCL1,CNDP2,CNP,COL1A2,COL6A1,COL6A2,COL6A3,CPNE2,EFEMP1,FAT1,FBLN2,FLNA,FN1,FSTL1,FTL,GNAI2,GRN,GSTM2,HLA-E,HSPA9,IGHG1,IGKV1-17,LAMB2,LGMN,MARCKSL1,MEST,METRNL,MIR21,MIR22,MSN,MXRA5,MYL6,NAGK,OLFML3,PAFAH1B1,PCOLCE,PFN1,PFN2,PLA2G2A,PLD3,PLOD3,PPIA,PPIB,PPP1CA,PSMA7,RAB8A,RHOG,S100A…
GO:CC	extracellular region part	GO:0044421	6.59601e-18	17.1807	3751	250	114	18842	ACTB,ADAMTS15,ANXA1,ANXA2,ANXA5,AP2M1,APOE,ARF3,ARHGDIA,ARHGDIB,ARPC1B,ATP1B3,BGN,C1QA,C1QC,C4A,CAPZA1,CCDC80,CD14,CD248,CFL1,CLEC3B,CLIC1,CLTCL1,CMTM3,CNDP2,CNP,COL1A1,COL1A2,COL3A1,COL5A1,COL5A2,COL6A1,COL6A2,COL6A3,COLEC12,CPNE2,CTSK,CXCL16,EFEMP1,FAT1,FBLN2,FBN1,FCGRT,FLNA,FN1,FSTL1,FTL,GNAI2,GRN,GSTM1,GSTM2,HLA-E,HSPA9,IGFBP4,IGHG1,IGKV1-17,LAMB2,LGMN,LOXL1,MARCKSL1,MEST,METRNL,MIR21,MIR22,M…
GO:CC	extracellular exosome	GO:0070062	2.85671e-17	16.5441	2143	250	82	18842	ACTB,ANXA1,ANXA2,ANXA5,AP2M1,APOE,ARF3,ARHGDIA,ARHGDIB,ARPC1B,ATP1B3,BGN,C4A,CAPZA1,CD14,CD248,CFL1,CLEC3B,CLIC1,CLTCL1,CNDP2,CNP,COL1A2,COL6A1,COL6A2,COL6A3,CPNE2,EFEMP1,FAT1,FLNA,FN1,FSTL1,FTL,GNAI2,GRN,GSTM2,HLA-E,HSPA9,IGHG1,IGKV1-17,LAMB2,LGMN,MARCKSL1,MEST,METRNL,MIR21,MIR22,MSN,MXRA5,MYL6,NAGK,PAFAH1B1,PCOLCE,PFN1,PFN2,PLA2G2A,PLD3,PLOD3,PPIA,PPIB,PPP1CA,PSMA7,RAB8A,RHOG,S100A10,S100A11,S1…
GO:CC	extracellular region	GO:0005576	1.12275e-16	15.9497	4536	250	125	18842	ACTB,ADAMTS15,ANXA1,ANXA2,ANXA5,AP2M1,APOE,ARF3,ARHGAP9,ARHGDIA,ARHGDIB,ARPC1B,ARSK,ATP1B3,BGN,C1ORF54,C1QA,C1QC,C4A,CAPZA1,CCDC80,CD14,CD248,CFL1,CHSY1,CLEC3B,CLIC1,CLTCL1,CMTM3,CNDP2,CNP,COL1A1,COL1A2,COL3A1,COL5A1,COL5A2,COL6A1,COL6A2,COL6A3,COLEC12,CPNE2,CTSK,CXCL16,CYB5R3,EFEMP1,FAT1,FBLN2,FBN1,FCGRT,FLNA,FN1,FSTL1,FTL,GHDC,GNAI2,GRN,GSTM1,GSTM2,HLA-E,HSPA9,IGFBP4,IGHG1,IGKV1-17,LAMB2,LGMN,L…
GO:CC	extracellular space	GO:0005615	1.24593e-14	13.9045	3541	250	104	18842	ACTB,ADAMTS15,ANXA1,ANXA2,ANXA5,AP2M1,APOE,ARF3,ARHGDIA,ARHGDIB,ARPC1B,ATP1B3,BGN,C1QA,C1QC,C4A,CAPZA1,CD14,CD248,CFL1,CLEC3B,CLIC1,CLTCL1,CMTM3,CNDP2,CNP,COL1A1,COL1A2,COL3A1,COL5A1,COL5A2,COL6A1,COL6A2,COL6A3,COLEC12,CPNE2,CTSK,CXCL16,EFEMP1,FAT1,FBN1,FCGRT,FLNA,FN1,FSTL1,FTL,GNAI2,GRN,GSTM2,HLA-E,HSPA9,IGFBP4,IGHG1,IGKV1-17,LAMB2,LGMN,LOXL1,MARCKSL1,MEST,METRNL,MIR21,MIR22,MMP2,MSN,MTUS1,MXRA5…
GO:CC	cytoplasm	GO:0005737	1.85253e-10	9.73223	11620	250	206	18842	ACKR1,ACTB,ADAP2,AKAP1,AKNA,AKT1,ALKBH6,ANXA1,ANXA2,ANXA5,AP2M1,APOE,ARF3,ARHGAP9,ARHGDIA,ARHGDIB,ARPC1B,ARSK,ATP1B3,BACE2,BAG3,BCAP31,BGN,BLOC1S5-TXNDC5,BRD2,C4A,CAPZA1,CCND3,CCR5,CD14,CD248,CD99,CDC25B,CDC42EP5,CDKN1B,CDKN1C,CFL1,CHSY1,CLEC3B,CLIC1,CLIP1,CLTCL1,CMTM3,CNDP2,CNP,COL1A1,COL1A2,COL3A1,COL5A1,COL5A2,COL6A1,COL6A2,COL6A3,COLEC12,COX10,COX6A1,CPNE2,CRIP1,CRIP2,CTSK,CYB5R3,DAB2,DUSP6,D…
GO:CC	endoplasmic reticulum lumen	GO:0005788	6.11952e-09	8.21328	306	250	23	18842	APOE,ARSK,C4A,COL1A1,COL1A2,COL3A1,COL5A1,COL5A2,COL6A1,COL6A2,COL6A3,FBN1,FN1,FSTL1,IGFBP4,LAMB2,OS9,PLOD3,PPIB,SERPINH1,TIMP1,TSPAN14,VCAN
GO:CC	cytoplasmic part	GO:0044444	1.21079e-08	7.91693	9760	250	180	18842	ACKR1,ACTB,ADAP2,AKAP1,AKNA,AKT1,ANXA1,ANXA2,ANXA5,AP2M1,APOE,ARF3,ARHGAP9,ARHGDIA,ARHGDIB,ARPC1B,ARSK,ATP1B3,BACE2,BAG3,BCAP31,BGN,BLOC1S5-TXNDC5,C4A,CAPZA1,CCR5,CD14,CDC25B,CDC42EP5,CDKN1B,CFL1,CHSY1,CLEC3B,CLIC1,CLIP1,CLTCL1,CNDP2,CNP,COL1A1,COL1A2,COL3A1,COL5A1,COL5A2,COL6A1,COL6A2,COL6A3,COLEC12,COX10,COX6A1,CRIP2,CTSK,CYB5R3,DAB2,DUSP6,DYNLL1,ECI1,EIF4H,EIF5,FAT1,FBN1,FCGRT,FLNA,FN1,FSTL1,F…
GO:CC	focal adhesion	GO:0005925	4.93969e-08	7.3063	403	250	25	18842	ACTB,ALKBH6,ANXA1,ANXA5,ARPC1B,CD99,CFL1,DAB2,FAT1,FLNA,GJA1,HSPA9,LASP1,LIMA1,MRC2,MSN,PDGFRB,PFN1,PPIA,PPIB,RHOG,SDCBP,TGFB1I1,THY1,ZYX
GO:CC	cell-substrate adherens junction	GO:0005924	5.77394e-08	7.23853	406	250	25	18842	ACTB,ALKBH6,ANXA1,ANXA5,ARPC1B,CD99,CFL1,DAB2,FAT1,FLNA,GJA1,HSPA9,LASP1,LIMA1,MRC2,MSN,PDGFRB,PFN1,PPIA,PPIB,RHOG,SDCBP,TGFB1I1,THY1,ZYX
GO:CC	adherens junction	GO:0005912	6.38423e-08	7.19489	546	250	29	18842	ACTB,ALKBH6,ANXA1,ANXA2,ANXA5,ARPC1B,CD99,CFL1,DAB2,FAT1,FLNA,GJA1,HSPA9,LASP1,LIMA1,MRC2,MSN,PDGFRB,PFN1,PPIA,PPIB,PPP1CA,RHOG,S100A11,SDCBP,TGFB1I1,THY1,TNKS1BP1,ZYX
GO:CC	cell-substrate junction	GO:0030055	7.46495e-08	7.12697	411	250	25	18842	ACTB,ALKBH6,ANXA1,ANXA5,ARPC1B,CD99,CFL1,DAB2,FAT1,FLNA,GJA1,HSPA9,LASP1,LIMA1,MRC2,MSN,PDGFRB,PFN1,PPIA,PPIB,RHOG,SDCBP,TGFB1I1,THY1,ZYX
GO:CC	anchoring junction	GO:0070161	1.20111e-07	6.92042	561	250	29	18842	ACTB,ALKBH6,ANXA1,ANXA2,ANXA5,ARPC1B,CD99,CFL1,DAB2,FAT1,FLNA,GJA1,HSPA9,LASP1,LIMA1,MRC2,MSN,PDGFRB,PFN1,PPIA,PPIB,PPP1CA,RHOG,S100A11,SDCBP,TGFB1I1,THY1,TNKS1BP1,ZYX
GO:CC	collagen trimer	GO:0005581	1.42508e-07	6.84616	97	250	13	18842	C1QA,C1QC,COL1A1,COL1A2,COL3A1,COL5A1,COL5A2,COL6A1,COL6A2,COL6A3,COLEC12,SERPINH1,TIMP1
GO:CC	endomembrane system	GO:0012505	1.07842e-06	5.96721	4490	250	101	18842	ACKR1,ANXA1,ANXA2,AP2M1,APOE,ARF3,ARHGAP9,ARSK,BACE2,BCAP31,BGN,BLOC1S5-TXNDC5,C4A,CCR5,CD14,CDC42EP5,CDKN1B,CHSY1,CLEC3B,CLIC1,CLIP1,CLTCL1,CMTM3,COL1A1,COL1A2,COL3A1,COL5A1,COL5A2,COL6A1,COL6A2,COL6A3,CTSK,CYB5R3,DAB2,DYNLL1,FBN1,FCGRT,FN1,FSTL1,FTL,FYCO1,GHDC,GIMAP1-GIMAP5,GJA1,GRN,GSTM2,HLA-E,HSD3B7,IGFBP4,KPNA1,LAMB2,LGMN,LOC102724985,LOXL1,MEST,MTUS1,NFE2L1,OS9,PAFAH1B1,PDE2A,PDGFRB,PIEZO1,…
GO:CC	cytoplasmic vesicle	GO:0031410	6.73785e-06	5.17148	2346	250	63	18842	ACKR1,ANXA1,ANXA2,AP2M1,APOE,ARHGAP9,ARHGDIB,ATP1B3,BACE2,BCAP31,BGN,BLOC1S5-TXNDC5,CCR5,CD14,CDKN1B,CLEC3B,CLIP1,CLTCL1,CNP,COL1A1,COLEC12,CTSK,CYB5R3,DAB2,DYNLL1,FCGRT,FN1,FTL,FYCO1,GHDC,GJA1,GRN,HLA-E,LGMN,LOXL1,PDGFRB,PLA2G2A,PLEKHO2,PPIA,PPIB,RAB31,RAB8A,RABAC1,RHOG,RPN1,S100A11,SDCBP,SERPING1,SREBF1,STAB1,STEAP2,SYPL1,TCIRG1,THBS2,TIMP1,TMEM173,TMSB4X,TNIK,TSPAN14,TUBA1A,VAMP3,WAS,ZYX
GO:CC	intracellular vesicle	GO:0097708	7.07185e-06	5.15047	2349	250	63	18842	ACKR1,ANXA1,ANXA2,AP2M1,APOE,ARHGAP9,ARHGDIB,ATP1B3,BACE2,BCAP31,BGN,BLOC1S5-TXNDC5,CCR5,CD14,CDKN1B,CLEC3B,CLIP1,CLTCL1,CNP,COL1A1,COLEC12,CTSK,CYB5R3,DAB2,DYNLL1,FCGRT,FN1,FTL,FYCO1,GHDC,GJA1,GRN,HLA-E,LGMN,LOXL1,PDGFRB,PLA2G2A,PLEKHO2,PPIA,PPIB,RAB31,RAB8A,RABAC1,RHOG,RPN1,S100A11,SDCBP,SERPING1,SREBF1,STAB1,STEAP2,SYPL1,TCIRG1,THBS2,TIMP1,TMEM173,TMSB4X,TNIK,TSPAN14,TUBA1A,VAMP3,WAS,ZYX
GO:CC	blood microparticle	GO:0072562	1.44207e-05	4.84101	141	250	13	18842	ACTB,ANXA5,APOE,C1QC,C4A,CLIC1,FN1,IGHG1,IGKV1-17,MSN,PFN1,SDCBP,SERPING1
GO:CC	basement membrane	GO:0005604	1.49649e-05	4.82493	95	250	11	18842	ANXA2,CCDC80,COL5A1,FBN1,FN1,LAMB2,LOXL1,TGFBI,THBS2,THBS4,TIMP1
GO:CC	banded collagen fibril	GO:0098643	8.23945e-05	4.0841	12	250	5	18842	COL1A1,COL1A2,COL3A1,COL5A1,COL5A2
GO:CC	fibrillar collagen trimer	GO:0005583	8.23945e-05	4.0841	12	250	5	18842	COL1A1,COL1A2,COL3A1,COL5A1,COL5A2
GO:CC	endoplasmic reticulum	GO:0005783	0.000132623	3.87738	1925	250	52	18842	APOE,ARSK,BACE2,BCAP31,C4A,COL1A1,COL1A2,COL3A1,COL5A1,COL5A2,COL6A1,COL6A2,COL6A3,CYB5R3,FBN1,FN1,FSTL1,GHDC,GIMAP1-GIMAP5,GJA1,GRN,GSTM2,HLA-E,HSD3B7,IGFBP4,LAMB2,LOC102724985,MEST,NFE2L1,OS9,PDE2A,PIEZO1,PLA2G2A,PLD3,PLOD3,PLP2,PPIB,RHOG,RPN1,S100A10,SDCBP,SERPINH1,SREBF1,THBS4,THY1,TIMP1,TMEM173,TRAM1,TSPAN14,TSPO,UFSP2,VCAN
GO:CC	endoplasmic reticulum part	GO:0044432	0.000412658	3.38441	1354	250	40	18842	APOE,ARSK,BCAP31,C4A,COL1A1,COL1A2,COL3A1,COL5A1,COL5A2,COL6A1,COL6A2,COL6A3,CYB5R3,FBN1,FN1,FSTL1,GJA1,HLA-E,HSD3B7,IGFBP4,LAMB2,MEST,NFE2L1,OS9,PIEZO1,PLA2G2A,PLD3,PLOD3,PLP2,PPIB,RHOG,RPN1,SDCBP,SERPINH1,SREBF1,TIMP1,TMEM173,TRAM1,TSPAN14,VCAN
GO:CC	secretory granule	GO:0030141	0.000636812	3.19599	835	250	29	18842	ANXA2,ARHGAP9,BACE2,CD14,CLEC3B,COL1A1,CYB5R3,DYNLL1,FN1,FTL,GHDC,GRN,LOXL1,PLA2G2A,PLEKHO2,PPIA,RAB31,RHOG,S100A11,SDCBP,SERPING1,SYPL1,TCIRG1,THBS2,TIMP1,TMEM173,TMSB4X,TSPAN14,VAMP3
GO:CC	extracellular matrix component	GO:0044420	0.00173248	2.76133	53	250	7	18842	COL1A1,COL1A2,COL3A1,COL5A1,COL5A2,FBN1,LAMB2
GO:CC	complex of collagen trimers	GO:0098644	0.00191977	2.71675	21	250	5	18842	COL1A1,COL1A2,COL3A1,COL5A1,COL5A2
GO:CC	perinuclear region of cytoplasm	GO:0048471	0.00276928	2.55763	712	250	25	18842	ANXA2,ARF3,BCAP31,CLIC1,CNP,EIF4H,FAT1,FLNA,FXR1,LGMN,MSN,MT1E,MT1F,MT1G,MT1H,MT2A,PAFAH1B1,PDE2A,PLA2G2A,PPIB,PREX1,S100A4,S100A6,TMEM173,VAMP3
GO:CC	secretory vesicle	GO:0099503	0.00286905	2.54226	1001	250	31	18842	ANXA2,ARHGAP9,BACE2,CD14,CLEC3B,COL1A1,CYB5R3,DYNLL1,FN1,FTL,GHDC,GRN,LOXL1,PLA2G2A,PLEKHO2,PPIA,RAB31,RAB8A,RABAC1,RHOG,S100A11,SDCBP,SERPING1,SYPL1,TCIRG1,THBS2,TIMP1,TMEM173,TMSB4X,TSPAN14,VAMP3
GO:CC	cytoplasmic vesicle part	GO:0044433	0.00528057	2.27732	1506	250	40	18842	ANXA1,ANXA2,AP2M1,APOE,ARHGAP9,CD14,CLEC3B,CLIP1,CLTCL1,COLEC12,CTSK,CYB5R3,DAB2,DYNLL1,FCGRT,FN1,FTL,GHDC,GJA1,GRN,HLA-E,LGMN,PLEKHO2,PPIA,RAB31,RAB8A,RHOG,S100A11,SDCBP,SERPING1,SREBF1,STAB1,STEAP2,SYPL1,TCIRG1,TIMP1,TMEM173,TMSB4X,TSPAN14,VAMP3
GO:CC	vacuolar lumen	GO:0005775	0.0055096	2.25888	172	250	11	18842	ANXA2,BGN,CTSK,CYB5R3,FTL,GRN,LGMN,PDGFRB,SDC3,SDCBP,VCAN
GO:CC	cell junction	GO:0030054	0.00740206	2.13065	1312	250	36	18842	ACTB,AKT1,ALKBH6,ANXA1,ANXA2,ANXA5,ARPC1B,C4A,CD99,CFL1,DAB2,FAT1,FLNA,GJA1,HSPA9,LASP1,LIMA1,MRC2,MSN,MYADM,PDGFRB,PFN1,PPIA,PPIB,PPP1CA,RABAC1,RHOG,S100A11,SDCBP,SH3PXD2B,TGFB1I1,THY1,TNKS1BP1,VAMP3,WAS,ZYX
GO:CC	membrane-bounded organelle	GO:0043227	0.0122373	1.91232	12536	250	195	18842	ACKR1,ACTB,ADAP2,AKAP1,AKNA,AKT1,ALKBH6,ANXA1,ANXA2,ANXA5,AP2M1,APOE,ARF3,ARHGAP9,ARHGDIA,ARHGDIB,ARPC1B,ARSK,ATP1B3,BACE2,BAG3,BCAP31,BGN,BLOC1S5-TXNDC5,BRD2,C4A,CAPZA1,CCND3,CCR5,CD14,CD248,CDC25B,CDKN1B,CDKN1C,CFL1,CHSY1,CLEC3B,CLIC1,CLIP1,CLTCL1,CMTM3,CNDP2,CNP,COL1A1,COL1A2,COL3A1,COL5A1,COL5A2,COL6A1,COL6A2,COL6A3,COLEC12,COX10,COX6A1,CPNE2,CTSK,CYB5R3,DAB2,DUSP6,DYNLL1,ECI1,EFEMP1,FAT1,FBL…
GO:CC	whole membrane	GO:0098805	0.0127946	1.89297	1678	250	42	18842	AKAP1,ANXA1,ANXA2,AP2M1,APOE,ATP1B3,CD14,CLTCL1,CNP,COL6A1,COLEC12,CYB5R3,DAB2,DYNLL1,FCGRT,GJA1,GNAI2,GRN,HLA-E,LAPTM5,MAPT,MYADM,PDE2A,RAB31,RAB8A,RHOG,S100A10,SDCBP,SERPINH1,SIDT2,SREBF1,STAB1,STEAP2,SYPL1,TCIRG1,THY1,TMEM173,TSPAN14,TSPO,TUBA1A,TUBA1B,VAMP3
GO:CC	cell periphery	GO:0071944	0.0170267	1.76887	5726	250	105	18842	ACKR1,ACTB,ACVRL1,ADAP2,ADIPOR2,AKT1,ANXA1,ANXA2,ANXA5,AP2M1,APOE,ARF3,ARHGDIA,ATP1B3,BACE2,BAG3,BCAP31,BGN,C4A,CAPZA1,CCR5,CD14,CD248,CD99,CDC42EP5,CFL1,CLIC1,CLTCL1,CNP,COL6A1,COL6A2,COL6A3,COLEC12,CPNE2,CRIP2,CXCL16,DAB2,DYNLL1,EIF5,EMP3,FAT1,FCGRT,FLNA,FN1,GJA1,GNAI2,GRN,HCST,HLA-E,ICAM2,IGHG1,IGKV1-17,LAPTM5,LASP1,LIMA1,LY6E,MAPT,MARCKSL1,MMP2,MSN,MTUS1,MYADM,PAFAH1B1,PCDHGA1,PDE2A,PDGFRB,PF…
GO:CC	secretory granule lumen	GO:0034774	0.0278667	1.55491	319	250	14	18842	ANXA2,ARHGAP9,CLEC3B,CYB5R3,FN1,FTL,GHDC,GRN,PPIA,S100A11,SDCBP,SERPING1,TIMP1,TMSB4X
GO:CC	cell cortex	GO:0005938	0.0307566	1.51206	322	250	14	18842	ACTB,ANXA2,CAPZA1,CFL1,CRIP2,FLNA,LASP1,MYADM,PAFAH1B1,PFN1,RHOG,TMOD1,TNFAIP2,WAS
GO:CC	cytoplasmic vesicle lumen	GO:0060205	0.0317761	1.4979	323	250	14	18842	ANXA2,ARHGAP9,CLEC3B,CYB5R3,FN1,FTL,GHDC,GRN,PPIA,S100A11,SDCBP,SERPING1,TIMP1,TMSB4X
GO:CC	vesicle lumen	GO:0031983	0.0339033	1.46976	325	250	14	18842	ANXA2,ARHGAP9,CLEC3B,CYB5R3,FN1,FTL,GHDC,GRN,PPIA,S100A11,SDCBP,SERPING1,TIMP1,TMSB4X
GO:CC	collagen type I trimer	GO:0005584	0.0498156	1.30263	2	250	2	18842	COL1A1,COL1A2
KEGG	Focal adhesion	KEGG:04510	6.69009e-06	5.17457	198	139	17	7772	ACTB,AKT1,CCND3,COL1A1,COL1A2,COL6A1,COL6A2,COL6A3,FLNA,FN1,LAMB2,PDGFRB,PPP1CA,SHC1,THBS2,THBS4,ZYX
KEGG	Mineral absorption	KEGG:04978	6.78218e-05	4.16863	58	139	9	7772	ATP1B3,FTL,MT1E,MT1F,MT1G,MT1H,MT1HL1,MT2A,STEAP2
KEGG	Protein digestion and absorption	KEGG:04974	0.00062203	3.20619	95	139	10	7772	ATP1B3,COL1A1,COL1A2,COL3A1,COL5A1,COL5A2,COL6A1,COL6A2,COL6A3,SLC7A7
KEGG	Phagosome	KEGG:04145	0.00105274	2.97768	147	139	12	7772	ACTB,CD14,COLEC12,HLA-E,MRC2,TCIRG1,THBS2,THBS4,TUBA1A,TUBA1B,TUBB2A,VAMP3
KEGG	Human papillomavirus infection	KEGG:05165	0.00200344	2.69822	330	139	18	7772	AKT1,BCAP31,CCND3,CDKN1B,COL1A1,COL1A2,COL6A1,COL6A2,COL6A3,FN1,HLA-E,LAMB2,PDGFRB,PPP2R3A,PSMC1,TCIRG1,THBS2,THBS4
KEGG	ECM-receptor interaction	KEGG:04512	0.00231084	2.63623	88	139	9	7772	COL1A1,COL1A2,COL6A1,COL6A2,COL6A3,FN1,LAMB2,THBS2,THBS4
KEGG	Pertussis	KEGG:05133	0.0364817	1.43792	76	139	7	7772	C1QA,C1QC,C4A,CD14,CFL1,GNAI2,SERPING1
KEGG	Salmonella infection	KEGG:05132	0.0427983	1.36857	78	139	7	7772	ACTB,ARPC1B,CD14,FLNA,PFN1,PFN2,RHOG
